# Supplementary material for: MetaBakery: a Singularity implementation of bioBakery tools as a skeleton application for efficient HPC deconvolution of microbiome metagenomic sequencing data to machine learning ready information
Source: Front Microbiol. 2024 Jul 30;15:1426465. doi: 10.3389/fmicb.2024.1426465 (PMC11321593; doi:10.3389/fmicb.2024.1426465)
Supplement: Supplementary file 1 [file Table_1.XLSX]

## Sheet: Table S1
Supplementary Data 1. Studies and samples used to construct a meta-dataset composed of 4,347 human stool metagenomes.
Author (Year)	Publication Title	Journal	Study Accession	Sample Accession	Sequencing Platform	Library Layout	Subject Health Status	Phenotypea	Subject Meta-datab
									Age (Years)	Sex	BMI (kg/m²)	Fasting Blood Glucose (mmol/L)	Triglycerides (mmol/L)	LDL Cholesterol (mmol/L)	Cholesterol (mmol/L)	HDL Cholesterol (mmol/L)	Physical Exercise (Yes/No/Hours)	Smoker (Yes/No)	Dairy Product Consumption	Meat Consumption (Yes/No/Vegetarian)	Alcohol Consumption (Yes/No/Frequency)
Jie (2017)	The gut microbiome in atherosclerotic cardiovascular disease	Nature Communications	PRJEB21528	SAMEA104142287	Illumina HiSeq 2000	PAIRED	Non-healthy	ACVD	42.8274	Male	22.58	4.5	1.41	5.24	7.25	0.55	N/A	N/A	N/A	N/A	N/A
Jie (2017)	The gut microbiome in atherosclerotic cardiovascular disease	Nature Communications	PRJEB21528	SAMEA104142288	Illumina HiSeq 2000	PAIRED	Non-healthy	ACVD	76.0274	Female	24.03	7.53	1.14	1.54	2.53	0.58	N/A	N/A	N/A	N/A	N/A
Jie (2017)	The gut microbiome in atherosclerotic cardiovascular disease	Nature Communications	PRJEB21528	SAMEA104142293	Illumina HiSeq 2000	PAIRED	Non-healthy	ACVD	73	Male	27.55	7.49	N/A	N/A	N/A	N/A	N/A	N/A	N/A	N/A	N/A
Jie (2017)	The gut microbiome in atherosclerotic cardiovascular disease	Nature Communications	PRJEB21528	SAMEA104142291	Illumina HiSeq 2000	PAIRED	Non-healthy	ACVD	45.3973	Male	23.62	14.56	2.85	1.19	2.68	0.63	N/A	N/A	N/A	N/A	N/A
Jie (2017)	The gut microbiome in atherosclerotic cardiovascular disease	Nature Communications	PRJEB21528	SAMEA104142284	Illumina HiSeq 2000	PAIRED	Non-healthy	ACVD	64.589	Female	24.44	4.61	1.75	4.8	7.47	1.31	N/A	N/A	N/A	N/A	N/A
Jie (2017)	The gut microbiome in atherosclerotic cardiovascular disease	Nature Communications	PRJEB21528	SAMEA104142295	Illumina HiSeq 2000	PAIRED	Non-healthy	ACVD	47.8795	Male	23.53	4.95	0.42	2.2	3.45	0.98	N/A	N/A	N/A	N/A	N/A
Jie (2017)	The gut microbiome in atherosclerotic cardiovascular disease	Nature Communications	PRJEB21528	SAMEA104142296	Illumina HiSeq 2000	PAIRED	Non-healthy	ACVD	79.5041	Male	22.145	4.94	0.66	1.61	3.46	1.25	N/A	N/A	N/A	N/A	N/A
Jie (2017)	The gut microbiome in atherosclerotic cardiovascular disease	Nature Communications	PRJEB21528	SAMEA104142297	Illumina HiSeq 2000	PAIRED	Non-healthy	ACVD	55	Male	22.22	16.86	N/A	N/A	N/A	N/A	N/A	N/A	N/A	N/A	N/A
Jie (2017)	The gut microbiome in atherosclerotic cardiovascular disease	Nature Communications	PRJEB21528	SAMEA104142298	Illumina HiSeq 2000	PAIRED	Non-healthy	ACVD	59.1918	Male	24.22	5.34	0.76	1.59	2.84	0.8	N/A	N/A	N/A	N/A	N/A
Jie (2017)	The gut microbiome in atherosclerotic cardiovascular disease	Nature Communications	PRJEB21528	SAMEA104142285	Illumina HiSeq 2000	PAIRED	Non-healthy	ACVD	77.6548	Male	20.76	5.32	0.96	1.66	2.84	0.81	N/A	N/A	N/A	N/A	N/A
Jie (2017)	The gut microbiome in atherosclerotic cardiovascular disease	Nature Communications	PRJEB21528	SAMEA104142299	Illumina HiSeq 2000	PAIRED	Non-healthy	ACVD	69	Male	18.63	4.32	0.92	1.51	3.05	1.07	N/A	N/A	N/A	N/A	N/A
Jie (2017)	The gut microbiome in atherosclerotic cardiovascular disease	Nature Communications	PRJEB21528	SAMEA104142300	Illumina HiSeq 2000	PAIRED	Non-healthy	ACVD	55.1644	Male	24.54	5.51	1.29	1.86	3.49	0.74	N/A	N/A	N/A	N/A	N/A
Jie (2017)	The gut microbiome in atherosclerotic cardiovascular disease	Nature Communications	PRJEB21528	SAMEA104142301	Illumina HiSeq 2000	PAIRED	Non-healthy	ACVD	59	Male	21.63	5.25	N/A	N/A	N/A	N/A	N/A	N/A	N/A	N/A	N/A
Jie (2017)	The gut microbiome in atherosclerotic cardiovascular disease	Nature Communications	PRJEB21528	SAMEA104142302	Illumina HiSeq 2000	PAIRED	Non-healthy	ACVD	67	Male	23.03	11.15	0.95	3.37	4.8	1.09	N/A	N/A	N/A	N/A	N/A
Jie (2017)	The gut microbiome in atherosclerotic cardiovascular disease	Nature Communications	PRJEB21528	SAMEA104142290	Illumina HiSeq 2000	PAIRED	Non-healthy	ACVD	61	Female	20.41	5.12	0.75	2.79	4.62	1.05	N/A	N/A	N/A	N/A	N/A
Jie (2017)	The gut microbiome in atherosclerotic cardiovascular disease	Nature Communications	PRJEB21528	SAMEA104142308	Illumina HiSeq 2000	PAIRED	Non-healthy	ACVD	47.4575	Male	22.491	5.15	0.67	1.48	3.23	1.26	N/A	N/A	N/A	N/A	N/A
Jie (2017)	The gut microbiome in atherosclerotic cardiovascular disease	Nature Communications	PRJEB21528	SAMEA104142307	Illumina HiSeq 2000	PAIRED	Non-healthy	ACVD	61	Male	17.3	5.47	3.42	3.19	5.77	0.78	N/A	N/A	N/A	N/A	N/A
Jie (2017)	The gut microbiome in atherosclerotic cardiovascular disease	Nature Communications	PRJEB21528	SAMEA104142292	Illumina HiSeq 2000	PAIRED	Non-healthy	ACVD	44.3753	Male	28.37	4.91	2.13	2.05	3.82	0.83	N/A	N/A	N/A	N/A	N/A
Jie (2017)	The gut microbiome in atherosclerotic cardiovascular disease	Nature Communications	PRJEB21528	SAMEA104142283	Illumina HiSeq 2000	PAIRED	Non-healthy	ACVD	75.0027	Male	23.05	4.67	1.32	2.99	4.59	0.85	N/A	N/A	N/A	N/A	N/A
Jie (2017)	The gut microbiome in atherosclerotic cardiovascular disease	Nature Communications	PRJEB21528	SAMEA104142289	Illumina HiSeq 2000	PAIRED	Non-healthy	ACVD	78.6	Female	21.08	6.04	1.72	3.21	5.52	1.02	N/A	N/A	N/A	N/A	N/A
Jie (2017)	The gut microbiome in atherosclerotic cardiovascular disease	Nature Communications	PRJEB21528	SAMEA104142303	Illumina HiSeq 2000	PAIRED	Non-healthy	ACVD	65.4521	Male	30.11	8.34	1.65	1.41	2.75	0.84	N/A	N/A	N/A	N/A	N/A
Jie (2017)	The gut microbiome in atherosclerotic cardiovascular disease	Nature Communications	PRJEB21528	SAMEA104142278	Illumina HiSeq 2000	PAIRED	Non-healthy	ACVD	48.4411	Male	27.251	6.38	1.24	1.84	3.2	0.63	N/A	N/A	N/A	N/A	N/A
Jie (2017)	The gut microbiome in atherosclerotic cardiovascular disease	Nature Communications	PRJEB21528	SAMEA104142277	Illumina HiSeq 2000	PAIRED	Non-healthy	ACVD	68	Male	24.22	4.45	N/A	N/A	N/A	N/A	N/A	N/A	N/A	N/A	N/A
Jie (2017)	The gut microbiome in atherosclerotic cardiovascular disease	Nature Communications	PRJEB21528	SAMEA104142276	Illumina HiSeq 2000	PAIRED	Non-healthy	ACVD	47.0082	Male	20.58	N/A	0.97	2.16	3.77	0.86	N/A	N/A	N/A	N/A	N/A
Jie (2017)	The gut microbiome in atherosclerotic cardiovascular disease	Nature Communications	PRJEB21528	SAMEA104142275	Illumina HiSeq 2000	PAIRED	Non-healthy	ACVD	75.2575	Female	20	4.96	0.56	2.88	5.5	1.72	N/A	N/A	N/A	N/A	N/A
Jie (2017)	The gut microbiome in atherosclerotic cardiovascular disease	Nature Communications	PRJEB21528	SAMEA104142274	Illumina HiSeq 2000	PAIRED	Non-healthy	ACVD	70	Female	26.44	6.39	N/A	N/A	N/A	N/A	N/A	N/A	N/A	N/A	N/A
Jie (2017)	The gut microbiome in atherosclerotic cardiovascular disease	Nature Communications	PRJEB21528	SAMEA104142273	Illumina HiSeq 2000	PAIRED	Non-healthy	ACVD	44	Male	20.55	5.78	N/A	N/A	N/A	N/A	N/A	N/A	N/A	N/A	N/A
Jie (2017)	The gut microbiome in atherosclerotic cardiovascular disease	Nature Communications	PRJEB21528	SAMEA104142272	Illumina HiSeq 2000	PAIRED	Non-healthy	ACVD	76.9973	Female	23.73	12.71	2.32	4.29	6.39	0.9	N/A	N/A	N/A	N/A	N/A
Jie (2017)	The gut microbiome in atherosclerotic cardiovascular disease	Nature Communications	PRJEB21528	SAMEA104142271	Illumina HiSeq 2000	PAIRED	Non-healthy	ACVD	81.7288	Female	N/A	5.44	1.41	1.12	2.72	0.81	N/A	N/A	N/A	N/A	N/A
Jie (2017)	The gut microbiome in atherosclerotic cardiovascular disease	Nature Communications	PRJEB21528	SAMEA104142270	Illumina HiSeq 2000	PAIRED	Non-healthy	ACVD	55.063	Male	19.03	11.04	1.06	1.66	2.88	0.68	N/A	N/A	N/A	N/A	N/A
Jie (2017)	The gut microbiome in atherosclerotic cardiovascular disease	Nature Communications	PRJEB21528	SAMEA104142269	Illumina HiSeq 2000	PAIRED	Non-healthy	ACVD	71	Male	26.4	3.97	1.26	2.65	3.88	0.59	N/A	N/A	N/A	N/A	N/A
Jie (2017)	The gut microbiome in atherosclerotic cardiovascular disease	Nature Communications	PRJEB21528	SAMEA104142268	Illumina HiSeq 2000	PAIRED	Non-healthy	ACVD	52	Male	26.45	3.8	2.63	2.15	4.81	0.71	N/A	N/A	N/A	N/A	N/A
Jie (2017)	The gut microbiome in atherosclerotic cardiovascular disease	Nature Communications	PRJEB21528	SAMEA104142267	Illumina HiSeq 2000	PAIRED	Non-healthy	ACVD	47.789	Male	21.11	7.38	3.14	2.58	5.22	0.76	N/A	N/A	N/A	N/A	N/A
Jie (2017)	The gut microbiome in atherosclerotic cardiovascular disease	Nature Communications	PRJEB21528	SAMEA104142266	Illumina HiSeq 2000	PAIRED	Non-healthy	ACVD	61.6822	Male	27.01	6.03	1.28	4.72	6.67	0.65	N/A	N/A	N/A	N/A	N/A
Jie (2017)	The gut microbiome in atherosclerotic cardiovascular disease	Nature Communications	PRJEB21528	SAMEA104142265	Illumina HiSeq 2000	PAIRED	Non-healthy	ACVD	68	Female	27.59	10.69	N/A	N/A	N/A	N/A	N/A	N/A	N/A	N/A	N/A
Jie (2017)	The gut microbiome in atherosclerotic cardiovascular disease	Nature Communications	PRJEB21528	SAMEA104142264	Illumina HiSeq 2000	PAIRED	Non-healthy	ACVD	50.9534	Male	29.71	5.97	0.64	3.28	5.03	0.91	N/A	N/A	N/A	N/A	N/A
Jie (2017)	The gut microbiome in atherosclerotic cardiovascular disease	Nature Communications	PRJEB21528	SAMEA104142263	Illumina HiSeq 2000	PAIRED	Non-healthy	ACVD	45.4192	Male	23.7	5.81	1.36	2.08	3.69	0.89	N/A	N/A	N/A	N/A	N/A
Jie (2017)	The gut microbiome in atherosclerotic cardiovascular disease	Nature Communications	PRJEB21528	SAMEA104142262	Illumina HiSeq 2000	PAIRED	Non-healthy	ACVD	47	Male	25.65	5.06	0.49	1.01	2.84	1.3	N/A	N/A	N/A	N/A	N/A
Jie (2017)	The gut microbiome in atherosclerotic cardiovascular disease	Nature Communications	PRJEB21528	SAMEA104142261	Illumina HiSeq 2000	PAIRED	Non-healthy	ACVD	52	Male	23.88	4.94	0.66	1.61	3.46	1.25	N/A	N/A	N/A	N/A	N/A
Jie (2017)	The gut microbiome in atherosclerotic cardiovascular disease	Nature Communications	PRJEB21528	SAMEA104142260	Illumina HiSeq 2000	PAIRED	Non-healthy	ACVD	59	Male	25.59	6.58	1.06	3.92	5.59	1.2	N/A	N/A	N/A	N/A	N/A
Jie (2017)	The gut microbiome in atherosclerotic cardiovascular disease	Nature Communications	PRJEB21528	SAMEA104142259	Illumina HiSeq 2000	PAIRED	Non-healthy	ACVD	76.8575	Female	17.24	5.19	1.34	2.24	4.54	1.89	N/A	N/A	N/A	N/A	N/A
Jie (2017)	The gut microbiome in atherosclerotic cardiovascular disease	Nature Communications	PRJEB21528	SAMEA104142258	Illumina HiSeq 2000	PAIRED	Non-healthy	ACVD	58.9726	Male	24.3	3.8	2.63	2.15	4.81	0.71	N/A	N/A	N/A	N/A	N/A
Jie (2017)	The gut microbiome in atherosclerotic cardiovascular disease	Nature Communications	PRJEB21528	SAMEA104142257	Illumina HiSeq 2000	PAIRED	Non-healthy	ACVD	55.6521	Male	31.89	7.6	1.64	2.12	3.67	0.82	N/A	N/A	N/A	N/A	N/A
Jie (2017)	The gut microbiome in atherosclerotic cardiovascular disease	Nature Communications	PRJEB21528	SAMEA104142256	Illumina HiSeq 2000	PAIRED	Non-healthy	ACVD	66	Male	24.61	4.67	1.32	2.99	4.59	0.85	N/A	N/A	N/A	N/A	N/A
Jie (2017)	The gut microbiome in atherosclerotic cardiovascular disease	Nature Communications	PRJEB21528	SAMEA104142254	Illumina HiSeq 2000	PAIRED	Non-healthy	ACVD	65.0932	Female	22.507	7.85	1.49	3.41	5.14	0.93	N/A	N/A	N/A	N/A	N/A
Jie (2017)	The gut microbiome in atherosclerotic cardiovascular disease	Nature Communications	PRJEB21528	SAMEA104142253	Illumina HiSeq 2000	PAIRED	Non-healthy	ACVD	68	Female	29.86	6.59	6.41	2.04	5.44	0.92	N/A	N/A	N/A	N/A	N/A
Jie (2017)	The gut microbiome in atherosclerotic cardiovascular disease	Nature Communications	PRJEB21528	SAMEA104142252	Illumina HiSeq 2000	PAIRED	Non-healthy	ACVD	48.3863	Male	22.27	5.99	1.44	2.62	4.41	1.05	N/A	N/A	N/A	N/A	N/A
Jie (2017)	The gut microbiome in atherosclerotic cardiovascular disease	Nature Communications	PRJEB21528	SAMEA104142250	Illumina HiSeq 2000	PAIRED	Non-healthy	ACVD	52.2521	Male	23.67	5.61	1.09	3.83	5.59	0.84	N/A	N/A	N/A	N/A	N/A
Jie (2017)	The gut microbiome in atherosclerotic cardiovascular disease	Nature Communications	PRJEB21528	SAMEA104142249	Illumina HiSeq 2000	PAIRED	Non-healthy	ACVD	52	Male	29	5.4	1.39	1.21	2.39	0.69	N/A	N/A	N/A	N/A	N/A
Jie (2017)	The gut microbiome in atherosclerotic cardiovascular disease	Nature Communications	PRJEB21528	SAMEA104142248	Illumina HiSeq 2000	PAIRED	Non-healthy	ACVD	65	Male	27.72	8.47	N/A	N/A	N/A	N/A	N/A	N/A	N/A	N/A	N/A
Jie (2017)	The gut microbiome in atherosclerotic cardiovascular disease	Nature Communications	PRJEB21528	SAMEA104142315	Illumina HiSeq 2000	PAIRED	Non-healthy	ACVD	54	Male	22.77	13.8	1.29	3.1	4.7	0.96	N/A	N/A	N/A	N/A	N/A
Jie (2017)	The gut microbiome in atherosclerotic cardiovascular disease	Nature Communications	PRJEB21528	SAMEA104142322	Illumina HiSeq 2000	PAIRED	Non-healthy	ACVD	61.5753	Female	31.25	5.05	1.14	2.16	3.64	0.69	N/A	N/A	N/A	N/A	N/A
Jie (2017)	The gut microbiome in atherosclerotic cardiovascular disease	Nature Communications	PRJEB21528	SAMEA104142281	Illumina HiSeq 2000	PAIRED	Non-healthy	ACVD	60	Male	21.01	6.68	2.17	2.51	4.17	0.68	N/A	N/A	N/A	N/A	N/A
Jie (2017)	The gut microbiome in atherosclerotic cardiovascular disease	Nature Communications	PRJEB21528	SAMEA104142319	Illumina HiSeq 2000	PAIRED	Non-healthy	ACVD	57.2575	Male	26.57	4.98	1.53	2.09	3.31	0.86	N/A	N/A	N/A	N/A	N/A
Jie (2017)	The gut microbiome in atherosclerotic cardiovascular disease	Nature Communications	PRJEB21528	SAMEA104142282	Illumina HiSeq 2000	PAIRED	Non-healthy	ACVD	33.8986	Male	35.51	6.55	1.33	2.33	3.31	0.68	N/A	N/A	N/A	N/A	N/A
Jie (2017)	The gut microbiome in atherosclerotic cardiovascular disease	Nature Communications	PRJEB21528	SAMEA104142279	Illumina HiSeq 2000	PAIRED	Non-healthy	ACVD	49.1863	Male	27.89	3.97	1.26	2.65	3.88	0.59	N/A	N/A	N/A	N/A	N/A
Jie (2017)	The gut microbiome in atherosclerotic cardiovascular disease	Nature Communications	PRJEB21528	SAMEA104142286	Illumina HiSeq 2000	PAIRED	Non-healthy	ACVD	71.7507	Male	30.35	6.94	1.54	1.76	3.05	0.73	N/A	N/A	N/A	N/A	N/A
Jie (2017)	The gut microbiome in atherosclerotic cardiovascular disease	Nature Communications	PRJEB21528	SAMEA104142304	Illumina HiSeq 2000	PAIRED	Non-healthy	ACVD	56.5699	Male	28.13	3.79	1.32	1.84	3.11	0.58	N/A	N/A	N/A	N/A	N/A
Jie (2017)	The gut microbiome in atherosclerotic cardiovascular disease	Nature Communications	PRJEB21528	SAMEA104142305	Illumina HiSeq 2000	PAIRED	Non-healthy	ACVD	67.4438	Male	19.03	5.15	1.01	1.18	2.8	1.2	N/A	N/A	N/A	N/A	N/A
Jie (2017)	The gut microbiome in atherosclerotic cardiovascular disease	Nature Communications	PRJEB21528	SAMEA104142306	Illumina HiSeq 2000	PAIRED	Non-healthy	ACVD	82.1425	Female	22.35	6.92	0.77	1.4	3.05	1.03	N/A	N/A	N/A	N/A	N/A
Jie (2017)	The gut microbiome in atherosclerotic cardiovascular disease	Nature Communications	PRJEB21528	SAMEA104142247	Illumina HiSeq 2000	PAIRED	Non-healthy	ACVD	75.7699	Male	15.794	5.06	0.49	1.01	2.84	1.3	N/A	N/A	N/A	N/A	N/A
Jie (2017)	The gut microbiome in atherosclerotic cardiovascular disease	Nature Communications	PRJEB21528	SAMEA104142246	Illumina HiSeq 2000	PAIRED	Non-healthy	ACVD	61.0301	Male	27.38	12.91	1.27	3.08	4.92	0.81	N/A	N/A	N/A	N/A	N/A
Jie (2017)	The gut microbiome in atherosclerotic cardiovascular disease	Nature Communications	PRJEB21528	SAMEA104142245	Illumina HiSeq 2000	PAIRED	Non-healthy	ACVD	82.6466	Male	24.44	6.43	0.53	1.83	2.86	0.8	N/A	N/A	N/A	N/A	N/A
Jie (2017)	The gut microbiome in atherosclerotic cardiovascular disease	Nature Communications	PRJEB21528	SAMEA104142244	Illumina HiSeq 2000	PAIRED	Non-healthy	ACVD	54.8548	Male	23.6	5.4	1.39	1.21	2.39	0.69	N/A	N/A	N/A	N/A	N/A
Jie (2017)	The gut microbiome in atherosclerotic cardiovascular disease	Nature Communications	PRJEB21528	SAMEA104142243	Illumina HiSeq 2000	PAIRED	Non-healthy	ACVD	64.7753	Male	24.31	8.53	1.25	1.85	3.64	1.03	N/A	N/A	N/A	N/A	N/A
Jie (2017)	The gut microbiome in atherosclerotic cardiovascular disease	Nature Communications	PRJEB21528	SAMEA104142242	Illumina HiSeq 2000	PAIRED	Non-healthy	ACVD	49.926	Male	20.76	14.16	1.12	1.38	2.56	0.66	N/A	N/A	N/A	N/A	N/A
Jie (2017)	The gut microbiome in atherosclerotic cardiovascular disease	Nature Communications	PRJEB21528	SAMEA104142309	Illumina HiSeq 2000	PAIRED	Non-healthy	ACVD	75.8849	Male	22.65	4.32	0.92	1.51	3.05	1.07	N/A	N/A	N/A	N/A	N/A
Jie (2017)	The gut microbiome in atherosclerotic cardiovascular disease	Nature Communications	PRJEB21528	SAMEA104142241	Illumina HiSeq 2000	PAIRED	Non-healthy	ACVD	48.5425	Male	24.22	4.92	1.14	2.07	3.45	0.64	N/A	N/A	N/A	N/A	N/A
Jie (2017)	The gut microbiome in atherosclerotic cardiovascular disease	Nature Communications	PRJEB21528	SAMEA104142240	Illumina HiSeq 2000	PAIRED	Non-healthy	ACVD	58.5589	Female	26.99	11.31	1.49	2.71	4.21	0.82	N/A	N/A	N/A	N/A	N/A
Jie (2017)	The gut microbiome in atherosclerotic cardiovascular disease	Nature Communications	PRJEB21528	SAMEA104142311	Illumina HiSeq 2000	PAIRED	Non-healthy	ACVD	77.1397	Female	28.51	4.12	2.42	4.36	6.58	0.74	N/A	N/A	N/A	N/A	N/A
Jie (2017)	The gut microbiome in atherosclerotic cardiovascular disease	Nature Communications	PRJEB21528	SAMEA104142321	Illumina HiSeq 2000	PAIRED	Non-healthy	ACVD	58.7562	Male	23.42	6.48	0.96	1.67	2.8	0.7	N/A	N/A	N/A	N/A	N/A
Jie (2017)	The gut microbiome in atherosclerotic cardiovascular disease	Nature Communications	PRJEB21528	SAMEA104142239	Illumina HiSeq 2000	PAIRED	Non-healthy	ACVD	65.7288	Male	23.047	8.81	N/A	N/A	N/A	N/A	N/A	N/A	N/A	N/A	N/A
Jie (2017)	The gut microbiome in atherosclerotic cardiovascular disease	Nature Communications	PRJEB21528	SAMEA104142238	Illumina HiSeq 2000	PAIRED	Non-healthy	ACVD	65.074	Female	22.22	8.7	1.32	1.47	3.36	1.33	N/A	N/A	N/A	N/A	N/A
Jie (2017)	The gut microbiome in atherosclerotic cardiovascular disease	Nature Communications	PRJEB21528	SAMEA104142237	Illumina HiSeq 2000	PAIRED	Non-healthy	ACVD	69.1726	Male	24.65	6.25	3.37	3.66	6.16	0.84	N/A	N/A	N/A	N/A	N/A
Jie (2017)	The gut microbiome in atherosclerotic cardiovascular disease	Nature Communications	PRJEB21528	SAMEA104142280	Illumina HiSeq 2000	PAIRED	Non-healthy	ACVD	81.3397	Female	N/A	5.14	N/A	N/A	N/A	N/A	N/A	N/A	N/A	N/A	N/A
Jie (2017)	The gut microbiome in atherosclerotic cardiovascular disease	Nature Communications	PRJEB21528	SAMEA104142317	Illumina HiSeq 2000	PAIRED	Non-healthy	ACVD	32.4137	Male	29.34	4.46	4.48	1.76	3.93	0.53	N/A	N/A	N/A	N/A	N/A
Jie (2017)	The gut microbiome in atherosclerotic cardiovascular disease	Nature Communications	PRJEB21528	SAMEA104142209	Illumina HiSeq 2000	PAIRED	Non-healthy	ACVD	55.4438	Male	27.755	5.95	1.6	2.37	3.7	0.78	N/A	N/A	N/A	N/A	N/A
Jie (2017)	The gut microbiome in atherosclerotic cardiovascular disease	Nature Communications	PRJEB21528	SAMEA104142208	Illumina HiSeq 2000	PAIRED	Non-healthy	ACVD	42.3178	Male	30.116	5.73	5.96	3.2	6.09	0.98	N/A	N/A	N/A	N/A	N/A
Jie (2017)	The gut microbiome in atherosclerotic cardiovascular disease	Nature Communications	PRJEB21528	SAMEA104142207	Illumina HiSeq 2000	PAIRED	Non-healthy	ACVD	58.5315	Female	24.088	5.02	1.18	2.66	4.56	1	N/A	N/A	N/A	N/A	N/A
Jie (2017)	The gut microbiome in atherosclerotic cardiovascular disease	Nature Communications	PRJEB21528	SAMEA104142206	Illumina HiSeq 2000	PAIRED	Non-healthy	ACVD	74.5123	Female	26.667	5.53	1.54	5.7	8.11	1.46	N/A	N/A	N/A	N/A	N/A
Jie (2017)	The gut microbiome in atherosclerotic cardiovascular disease	Nature Communications	PRJEB21528	SAMEA104142205	Illumina HiSeq 2000	PAIRED	Non-healthy	ACVD	49.0027	Male	23.624	5.86	2.07	2.08	3.94	1.11	N/A	N/A	N/A	N/A	N/A
Jie (2017)	The gut microbiome in atherosclerotic cardiovascular disease	Nature Communications	PRJEB21528	SAMEA104142204	Illumina HiSeq 2000	PAIRED	Non-healthy	ACVD	66.1808	Male	21.453	6.94	1.74	3.36	5.29	1	N/A	N/A	N/A	N/A	N/A
Jie (2017)	The gut microbiome in atherosclerotic cardiovascular disease	Nature Communications	PRJEB21528	SAMEA104142203	Illumina HiSeq 2000	PAIRED	Non-healthy	ACVD	75.7562	Male	22.5	5.89	0.9	1.33	3.33	1.28	N/A	N/A	N/A	N/A	N/A
Jie (2017)	The gut microbiome in atherosclerotic cardiovascular disease	Nature Communications	PRJEB21528	SAMEA104142202	Illumina HiSeq 2000	PAIRED	Non-healthy	ACVD	62.463	Male	25.712	4.41	2.08	3.59	5.02	0.97	N/A	N/A	N/A	N/A	N/A
Jie (2017)	The gut microbiome in atherosclerotic cardiovascular disease	Nature Communications	PRJEB21528	SAMEA104142201	Illumina HiSeq 2000	PAIRED	Non-healthy	ACVD	60.4603	Male	30.116	4.76	2.22	2.93	4.6	1.02	N/A	N/A	N/A	N/A	N/A
Jie (2017)	The gut microbiome in atherosclerotic cardiovascular disease	Nature Communications	PRJEB21528	SAMEA104142200	Illumina HiSeq 2000	PAIRED	Non-healthy	ACVD	67.6849	Male	24.61	8.41	1.23	4	5.38	1.24	N/A	N/A	N/A	N/A	N/A
Jie (2017)	The gut microbiome in atherosclerotic cardiovascular disease	Nature Communications	PRJEB21528	SAMEA104142199	Illumina HiSeq 2000	PAIRED	Non-healthy	ACVD	46.2301	Female	23.936	5.06	7.3	1.89	6	0.85	N/A	N/A	N/A	N/A	N/A
Jie (2017)	The gut microbiome in atherosclerotic cardiovascular disease	Nature Communications	PRJEB21528	SAMEA104142086	Illumina HiSeq 2000	PAIRED	Non-healthy	ACVD	70.2658	Female	20.957	7.23	1.9	3.67	6.04	1.56	N/A	N/A	N/A	N/A	N/A
Jie (2017)	The gut microbiome in atherosclerotic cardiovascular disease	Nature Communications	PRJEB21528	SAMEA104142198	Illumina HiSeq 2000	PAIRED	Non-healthy	ACVD	48.1233	Female	22.232	7.71	1.95	3.11	4.54	0.82	N/A	N/A	N/A	N/A	N/A
Jie (2017)	The gut microbiome in atherosclerotic cardiovascular disease	Nature Communications	PRJEB21528	SAMEA104142197	Illumina HiSeq 2000	PAIRED	Non-healthy	ACVD	61.7781	Female	29.667	9.59	1.04	4.04	5.93	1.53	N/A	N/A	N/A	N/A	N/A
Jie (2017)	The gut microbiome in atherosclerotic cardiovascular disease	Nature Communications	PRJEB21528	SAMEA104142196	Illumina HiSeq 2000	PAIRED	Non-healthy	ACVD	72.7534	Male	26.906	6.78	1.56	2.02	3.56	0.9	N/A	N/A	N/A	N/A	N/A
Jie (2017)	The gut microbiome in atherosclerotic cardiovascular disease	Nature Communications	PRJEB21528	SAMEA104142195	Illumina HiSeq 2000	PAIRED	Non-healthy	ACVD	71.4658	Male	26.573	5.85	1.69	3.45	4.95	0.7	N/A	N/A	N/A	N/A	N/A
Jie (2017)	The gut microbiome in atherosclerotic cardiovascular disease	Nature Communications	PRJEB21528	SAMEA104142194	Illumina HiSeq 2000	PAIRED	Non-healthy	ACVD	66.2959	Male	21.936	6	0.57	2.57	4.36	1.16	N/A	N/A	N/A	N/A	N/A
Jie (2017)	The gut microbiome in atherosclerotic cardiovascular disease	Nature Communications	PRJEB21528	SAMEA104142193	Illumina HiSeq 2000	PAIRED	Non-healthy	ACVD	50.2438	Male	21.484	5.4	0.92	1.48	2.87	0.88	N/A	N/A	N/A	N/A	N/A
Jie (2017)	The gut microbiome in atherosclerotic cardiovascular disease	Nature Communications	PRJEB21528	SAMEA104142192	Illumina HiSeq 2000	PAIRED	Non-healthy	ACVD	46.8658	Male	27.181	4.86	3.53	2.93	5.13	0.79	N/A	N/A	N/A	N/A	N/A
Jie (2017)	The gut microbiome in atherosclerotic cardiovascular disease	Nature Communications	PRJEB21528	SAMEA104142191	Illumina HiSeq 2000	PAIRED	Non-healthy	ACVD	80.2082	Female	22.833	5.43	0.85	2.91	4.81	0.98	N/A	N/A	N/A	N/A	N/A
Jie (2017)	The gut microbiome in atherosclerotic cardiovascular disease	Nature Communications	PRJEB21528	SAMEA104142190	Illumina HiSeq 2000	PAIRED	Non-healthy	ACVD	70.8904	Female	30.043	5.1	1.18	1.97	3.69	1.09	N/A	N/A	N/A	N/A	N/A
Jie (2017)	The gut microbiome in atherosclerotic cardiovascular disease	Nature Communications	PRJEB21528	SAMEA104142189	Illumina HiSeq 2000	PAIRED	Non-healthy	ACVD	68.1233	Female	22.827	4.9	0.92	4.39	7.24	1.62	N/A	N/A	N/A	N/A	N/A
Jie (2017)	The gut microbiome in atherosclerotic cardiovascular disease	Nature Communications	PRJEB21528	SAMEA104142188	Illumina HiSeq 2000	PAIRED	Non-healthy	ACVD	68.1068	Male	23.307	11.77	1.54	2.36	4.06	0.83	N/A	N/A	N/A	N/A	N/A
Jie (2017)	The gut microbiome in atherosclerotic cardiovascular disease	Nature Communications	PRJEB21528	SAMEA104142187	Illumina HiSeq 2000	PAIRED	Non-healthy	ACVD	70.2521	Male	20.904	16.37	1.35	1.76	3.16	0.74	N/A	N/A	N/A	N/A	N/A
Jie (2017)	The gut microbiome in atherosclerotic cardiovascular disease	Nature Communications	PRJEB21528	SAMEA104142186	Illumina HiSeq 2000	PAIRED	Non-healthy	ACVD	59.4658	Female	24.97	10.65	1.11	2.7	4.73	1.21	N/A	N/A	N/A	N/A	N/A
Jie (2017)	The gut microbiome in atherosclerotic cardiovascular disease	Nature Communications	PRJEB21528	SAMEA104142185	Illumina HiSeq 2000	PAIRED	Non-healthy	ACVD	57.4904	Female	20.429	6.52	1.17	3.53	6.1	1.43	N/A	N/A	N/A	N/A	N/A
Jie (2017)	The gut microbiome in atherosclerotic cardiovascular disease	Nature Communications	PRJEB21528	SAMEA104142184	Illumina HiSeq 2000	PAIRED	Non-healthy	ACVD	54.1233	Male	17.53	5.04	1.24	2.28	3.95	0.94	N/A	N/A	N/A	N/A	N/A
Jie (2017)	The gut microbiome in atherosclerotic cardiovascular disease	Nature Communications	PRJEB21528	SAMEA104142183	Illumina HiSeq 2000	PAIRED	Non-healthy	ACVD	72.126	Male	30.37	5.89	1.62	2.81	4.83	0.84	N/A	N/A	N/A	N/A	N/A
Jie (2017)	The gut microbiome in atherosclerotic cardiovascular disease	Nature Communications	PRJEB21528	SAMEA104142182	Illumina HiSeq 2000	PAIRED	Non-healthy	ACVD	54.926	Male	25.559	7.06	1.43	2.03	3.64	0.72	N/A	N/A	N/A	N/A	N/A
Jie (2017)	The gut microbiome in atherosclerotic cardiovascular disease	Nature Communications	PRJEB21528	SAMEA104142181	Illumina HiSeq 2000	PAIRED	Non-healthy	ACVD	66.411	Female	23.24	7.93	4.06	1.85	5.17	0.9	N/A	N/A	N/A	N/A	N/A
Jie (2017)	The gut microbiome in atherosclerotic cardiovascular disease	Nature Communications	PRJEB21528	SAMEA104142180	Illumina HiSeq 2000	PAIRED	Non-healthy	ACVD	53.0247	Male	26.67	5.14	1.31	3.64	5.77	0.92	N/A	N/A	N/A	N/A	N/A
Jie (2017)	The gut microbiome in atherosclerotic cardiovascular disease	Nature Communications	PRJEB21528	SAMEA104142179	Illumina HiSeq 2000	PAIRED	Non-healthy	ACVD	55.0301	Male	26.172	5.25	2.52	1.37	3.43	0.67	N/A	N/A	N/A	N/A	N/A
Jie (2017)	The gut microbiome in atherosclerotic cardiovascular disease	Nature Communications	PRJEB21528	SAMEA104142178	Illumina HiSeq 2000	PAIRED	Non-healthy	ACVD	62.4877	Female	16.437	5.77	1.26	3.92	5.42	0.91	N/A	N/A	N/A	N/A	N/A
Jie (2017)	The gut microbiome in atherosclerotic cardiovascular disease	Nature Communications	PRJEB21528	SAMEA104142177	Illumina HiSeq 2000	PAIRED	Non-healthy	ACVD	77.4877	Male	27.54	5.1	3.08	0.93	3.11	0.69	N/A	N/A	N/A	N/A	N/A
Jie (2017)	The gut microbiome in atherosclerotic cardiovascular disease	Nature Communications	PRJEB21528	SAMEA104142176	Illumina HiSeq 2000	PAIRED	Non-healthy	ACVD	67.3068	Female	24.14	4.4	1.3	2.83	4.57	1.27	N/A	N/A	N/A	N/A	N/A
Jie (2017)	The gut microbiome in atherosclerotic cardiovascular disease	Nature Communications	PRJEB21528	SAMEA104142175	Illumina HiSeq 2000	PAIRED	Non-healthy	ACVD	63.1178	Male	29.17	5.36	0.91	2.32	4.2	0.93	N/A	N/A	N/A	N/A	N/A
Jie (2017)	The gut microbiome in atherosclerotic cardiovascular disease	Nature Communications	PRJEB21528	SAMEA104142174	Illumina HiSeq 2000	PAIRED	Non-healthy	ACVD	61.2822	Female	N/A	7	1.42	1.96	3.72	0.62	N/A	N/A	N/A	N/A	N/A
Jie (2017)	The gut microbiome in atherosclerotic cardiovascular disease	Nature Communications	PRJEB21528	SAMEA104142310	Illumina HiSeq 2000	PAIRED	Non-healthy	ACVD	59.0904	Male	31.14	4.98	1.66	1.87	3.44	0.87	N/A	N/A	N/A	N/A	N/A
Jie (2017)	The gut microbiome in atherosclerotic cardiovascular disease	Nature Communications	PRJEB21528	SAMEA104142173	Illumina HiSeq 2000	PAIRED	Non-healthy	ACVD	65.8438	Female	21.875	7.6	1.23	2.41	4.46	1.23	N/A	N/A	N/A	N/A	N/A
Jie (2017)	The gut microbiome in atherosclerotic cardiovascular disease	Nature Communications	PRJEB21528	SAMEA104142172	Illumina HiSeq 2000	PAIRED	Non-healthy	ACVD	50.6247	Male	28.01	4.38	1.61	2.61	4.4	0.96	N/A	N/A	N/A	N/A	N/A
Jie (2017)	The gut microbiome in atherosclerotic cardiovascular disease	Nature Communications	PRJEB21528	SAMEA104142171	Illumina HiSeq 2000	PAIRED	Non-healthy	ACVD	60.7178	Male	30.42	4.9	1.71	4.11	5.56	1.14	N/A	N/A	N/A	N/A	N/A
Jie (2017)	The gut microbiome in atherosclerotic cardiovascular disease	Nature Communications	PRJEB21528	SAMEA104142170	Illumina HiSeq 2000	PAIRED	Non-healthy	ACVD	60.4164	Male	25.28	4.5	2.76	1.74	3.6	0.96	N/A	N/A	N/A	N/A	N/A
Jie (2017)	The gut microbiome in atherosclerotic cardiovascular disease	Nature Communications	PRJEB21528	SAMEA104142169	Illumina HiSeq 2000	PAIRED	Non-healthy	ACVD	62.3644	Male	28.76	5.6	3.31	2.74	5.11	1.26	N/A	N/A	N/A	N/A	N/A
Jie (2017)	The gut microbiome in atherosclerotic cardiovascular disease	Nature Communications	PRJEB21528	SAMEA104142168	Illumina HiSeq 2000	PAIRED	Non-healthy	ACVD	47.6137	Female	22.51	5.05	1.71	4.08	6.04	1.48	N/A	N/A	N/A	N/A	N/A
Jie (2017)	The gut microbiome in atherosclerotic cardiovascular disease	Nature Communications	PRJEB21528	SAMEA104142167	Illumina HiSeq 2000	PAIRED	Non-healthy	ACVD	49.8493	Male	22.052	5.8	2.05	3.3	4.91	1.03	N/A	N/A	N/A	N/A	N/A
Jie (2017)	The gut microbiome in atherosclerotic cardiovascular disease	Nature Communications	PRJEB21528	SAMEA104142166	Illumina HiSeq 2000	PAIRED	Non-healthy	ACVD	56.9973	Male	26.03	5.73	0.78	1.43	3.07	1.01	N/A	N/A	N/A	N/A	N/A
Jie (2017)	The gut microbiome in atherosclerotic cardiovascular disease	Nature Communications	PRJEB21528	SAMEA104142165	Illumina HiSeq 2000	PAIRED	Non-healthy	ACVD	55.7808	Male	26.3	6.35	3	4.93	6.54	1	N/A	N/A	N/A	N/A	N/A
Jie (2017)	The gut microbiome in atherosclerotic cardiovascular disease	Nature Communications	PRJEB21528	SAMEA104142164	Illumina HiSeq 2000	PAIRED	Non-healthy	ACVD	70.5096	Female	20.69	6.71	1.4	3.05	4.54	1.03	N/A	N/A	N/A	N/A	N/A
Jie (2017)	The gut microbiome in atherosclerotic cardiovascular disease	Nature Communications	PRJEB21528	SAMEA104142163	Illumina HiSeq 2000	PAIRED	Non-healthy	ACVD	50.9123	Male	20.861	4.88	1.19	2.89	4.17	0.73	N/A	N/A	N/A	N/A	N/A
Jie (2017)	The gut microbiome in atherosclerotic cardiovascular disease	Nature Communications	PRJEB21528	SAMEA104142162	Illumina HiSeq 2000	PAIRED	Non-healthy	ACVD	56.0192	Male	25.51	10.1	1.21	2.57	4.45	1.35	N/A	N/A	N/A	N/A	N/A
Jie (2017)	The gut microbiome in atherosclerotic cardiovascular disease	Nature Communications	PRJEB21528	SAMEA104142161	Illumina HiSeq 2000	PAIRED	Non-healthy	ACVD	59.189	Male	19.835	4.72	0.74	3.17	4.1	0.75	N/A	N/A	N/A	N/A	N/A
Jie (2017)	The gut microbiome in atherosclerotic cardiovascular disease	Nature Communications	PRJEB21528	SAMEA104142160	Illumina HiSeq 2000	PAIRED	Non-healthy	ACVD	58.2329	Male	20.861	4.83	0.62	1.27	3.06	1.15	N/A	N/A	N/A	N/A	N/A
Jie (2017)	The gut microbiome in atherosclerotic cardiovascular disease	Nature Communications	PRJEB21528	SAMEA104142159	Illumina HiSeq 2000	PAIRED	Non-healthy	ACVD	59.1973	Female	28.999	5.9	1.45	2.28	4.04	1.14	N/A	N/A	N/A	N/A	N/A
Jie (2017)	The gut microbiome in atherosclerotic cardiovascular disease	Nature Communications	PRJEB21528	SAMEA104142158	Illumina HiSeq 2000	PAIRED	Non-healthy	ACVD	61.5123	Male	25.865	4.99	2.81	2.17	4	0.91	N/A	N/A	N/A	N/A	N/A
Jie (2017)	The gut microbiome in atherosclerotic cardiovascular disease	Nature Communications	PRJEB21528	SAMEA104142157	Illumina HiSeq 2000	PAIRED	Non-healthy	ACVD	45.0219	Male	29.066	5.95	2.35	3.54	5.49	1.15	N/A	N/A	N/A	N/A	N/A
Jie (2017)	The gut microbiome in atherosclerotic cardiovascular disease	Nature Communications	PRJEB21528	SAMEA104142156	Illumina HiSeq 2000	PAIRED	Non-healthy	ACVD	47.3068	Male	20.716	5	1.04	1.59	2.93	0.72	N/A	N/A	N/A	N/A	N/A
Jie (2017)	The gut microbiome in atherosclerotic cardiovascular disease	Nature Communications	PRJEB21528	SAMEA104142155	Illumina HiSeq 2000	PAIRED	Non-healthy	ACVD	49.2438	Female	27.365	4.97	2.11	2.86	5.04	0.94	N/A	N/A	N/A	N/A	N/A
Jie (2017)	The gut microbiome in atherosclerotic cardiovascular disease	Nature Communications	PRJEB21528	SAMEA104142154	Illumina HiSeq 2000	PAIRED	Non-healthy	ACVD	59.9178	Male	19.572	5.81	0.73	2.74	4.18	0.91	N/A	N/A	N/A	N/A	N/A
Jie (2017)	The gut microbiome in atherosclerotic cardiovascular disease	Nature Communications	PRJEB21528	SAMEA104142085	Illumina HiSeq 2000	PAIRED	Non-healthy	ACVD	63.0849	Female	N/A	N/A	N/A	N/A	N/A	N/A	N/A	N/A	N/A	N/A	N/A
Jie (2017)	The gut microbiome in atherosclerotic cardiovascular disease	Nature Communications	PRJEB21528	SAMEA104142084	Illumina HiSeq 2000	PAIRED	Non-healthy	ACVD	69.6548	Male	24.82	N/A	N/A	N/A	N/A	N/A	N/A	N/A	N/A	N/A	N/A
Jie (2017)	The gut microbiome in atherosclerotic cardiovascular disease	Nature Communications	PRJEB21528	SAMEA104142083	Illumina HiSeq 2000	PAIRED	Non-healthy	ACVD	58.8795	Female	N/A	N/A	N/A	N/A	N/A	N/A	N/A	N/A	N/A	N/A	N/A
Jie (2017)	The gut microbiome in atherosclerotic cardiovascular disease	Nature Communications	PRJEB21528	SAMEA104142082	Illumina HiSeq 2000	PAIRED	Non-healthy	ACVD	56.2438	Male	28.906	7.1	1.51	1.9	3.06	0.81	N/A	N/A	N/A	N/A	N/A
Jie (2017)	The gut microbiome in atherosclerotic cardiovascular disease	Nature Communications	PRJEB21528	SAMEA104142081	Illumina HiSeq 2000	PAIRED	Non-healthy	ACVD	64.5096	Male	25.712	N/A	N/A	N/A	N/A	N/A	N/A	N/A	N/A	N/A	N/A
Jie (2017)	The gut microbiome in atherosclerotic cardiovascular disease	Nature Communications	PRJEB21528	SAMEA104142080	Illumina HiSeq 2000	PAIRED	Non-healthy	ACVD	64.7945	Male	21.972	N/A	N/A	N/A	N/A	N/A	N/A	N/A	N/A	N/A	N/A
Jie (2017)	The gut microbiome in atherosclerotic cardiovascular disease	Nature Communications	PRJEB21528	SAMEA104142079	Illumina HiSeq 2000	PAIRED	Non-healthy	ACVD	65.3041	Female	21.333	N/A	N/A	N/A	N/A	N/A	N/A	N/A	N/A	N/A	N/A
Jie (2017)	The gut microbiome in atherosclerotic cardiovascular disease	Nature Communications	PRJEB21528	SAMEA104142313	Illumina HiSeq 2000	PAIRED	Non-healthy	ACVD	55.7589	Male	25.34	4.33	1.78	1.82	3.19	0.84	N/A	N/A	N/A	N/A	N/A
Jie (2017)	The gut microbiome in atherosclerotic cardiovascular disease	Nature Communications	PRJEB21528	SAMEA104142095	Illumina HiSeq 2000	PAIRED	Non-healthy	ACVD	65.7041	Male	28.374	N/A	N/A	N/A	N/A	N/A	N/A	N/A	N/A	N/A	N/A
Jie (2017)	The gut microbiome in atherosclerotic cardiovascular disease	Nature Communications	PRJEB21528	SAMEA104142094	Illumina HiSeq 2000	PAIRED	Non-healthy	ACVD	46.7945	Male	24.802	N/A	N/A	N/A	N/A	N/A	N/A	N/A	N/A	N/A	N/A
Jie (2017)	The gut microbiome in atherosclerotic cardiovascular disease	Nature Communications	PRJEB21528	SAMEA104142093	Illumina HiSeq 2000	PAIRED	Non-healthy	ACVD	46.3616	Male	29.408	10.21	0.97	2.27	4.08	1.18	N/A	N/A	N/A	N/A	N/A
Jie (2017)	The gut microbiome in atherosclerotic cardiovascular disease	Nature Communications	PRJEB21528	SAMEA104142092	Illumina HiSeq 2000	PAIRED	Non-healthy	ACVD	59.0932	Male	N/A	N/A	N/A	N/A	N/A	N/A	N/A	N/A	N/A	N/A	N/A
Jie (2017)	The gut microbiome in atherosclerotic cardiovascular disease	Nature Communications	PRJEB21528	SAMEA104142091	Illumina HiSeq 2000	PAIRED	Non-healthy	ACVD	61.4192	Male	N/A	N/A	N/A	N/A	N/A	N/A	N/A	N/A	N/A	N/A	N/A
Jie (2017)	The gut microbiome in atherosclerotic cardiovascular disease	Nature Communications	PRJEB21528	SAMEA104142090	Illumina HiSeq 2000	PAIRED	Non-healthy	ACVD	63.6219	Female	N/A	10.21	N/A	N/A	N/A	N/A	N/A	N/A	N/A	N/A	N/A
Jie (2017)	The gut microbiome in atherosclerotic cardiovascular disease	Nature Communications	PRJEB21528	SAMEA104142312	Illumina HiSeq 2000	PAIRED	Non-healthy	ACVD	57.9753	Female	22.27	8.07	1.84	2.73	4.56	0.89	N/A	N/A	N/A	N/A	N/A
Jie (2017)	The gut microbiome in atherosclerotic cardiovascular disease	Nature Communications	PRJEB21528	SAMEA104142314	Illumina HiSeq 2000	PAIRED	Non-healthy	ACVD	66.1589	Male	22.5	7.41	1.47	2.99	4.49	0.74	N/A	N/A	N/A	N/A	N/A
Jie (2017)	The gut microbiome in atherosclerotic cardiovascular disease	Nature Communications	PRJEB21528	SAMEA104142316	Illumina HiSeq 2000	PAIRED	Non-healthy	ACVD	56.1123	Male	24.91	6.8	0.87	2.38	3.72	0.78	N/A	N/A	N/A	N/A	N/A
Jie (2017)	The gut microbiome in atherosclerotic cardiovascular disease	Nature Communications	PRJEB21528	SAMEA104142324	Illumina HiSeq 2000	PAIRED	Non-healthy	ACVD	71	Male	23.94	5.2	1.42	4	5.87	0.97	N/A	N/A	N/A	N/A	N/A
Feng (2015)	Gut microbiome development along the colorectal adenoma–carcinoma sequence	Nature Communications	PRJEB7774	SAMEA3136703	Illumina HiSeq 2000	PAIRED	Non-healthy	Colorectal adenoma	70	Male	34.11	4.7	1	3.7	N/A	1.9	Yes	No	N/A	Yes	N/A
Feng (2015)	Gut microbiome development along the colorectal adenoma–carcinoma sequence	Nature Communications	PRJEB7774	SAMEA3136712	Illumina HiSeq 2000	PAIRED	Non-healthy	Colorectal adenoma	67	Male	27.14	5.1	1.5	5	N/A	1.3	Yes	Yes	N/A	Yes	N/A
Feng (2015)	Gut microbiome development along the colorectal adenoma–carcinoma sequence	Nature Communications	PRJEB7774	SAMEA3136714	Illumina HiSeq 2000	PAIRED	Non-healthy	Colorectal adenoma	62	Male	26.88	5.5	2.2	4.6	N/A	1.3	Yes	No	N/A	Yes	N/A
Feng (2015)	Gut microbiome development along the colorectal adenoma–carcinoma sequence	Nature Communications	PRJEB7774	SAMEA3136693	Illumina HiSeq 2000	PAIRED	Non-healthy	Colorectal adenoma	69	Female	24.13	5.4	1.8	4.6	N/A	1.7	Yes	No	N/A	Yes	N/A
Feng (2015)	Gut microbiome development along the colorectal adenoma–carcinoma sequence	Nature Communications	PRJEB7774	SAMEA3136707	Illumina HiSeq 2000	PAIRED	Non-healthy	Colorectal adenoma	62	Male	30.1	5.7	1.7	2.6	N/A	1.4	Yes	No	N/A	Yes	N/A
Feng (2015)	Gut microbiome development along the colorectal adenoma–carcinoma sequence	Nature Communications	PRJEB7774	SAMEA3136704	Illumina HiSeq 2000	PAIRED	Non-healthy	Colorectal adenoma	63	Male	34.08	5.4	1.1	4.5	N/A	1.9	Yes	Yes	N/A	Yes	N/A
Feng (2015)	Gut microbiome development along the colorectal adenoma–carcinoma sequence	Nature Communications	PRJEB7774	SAMEA3136680	Illumina HiSeq 2000	PAIRED	Non-healthy	Colorectal adenoma	68	Female	34.01	6.2	1.3	3.7	N/A	1.6	Yes	No	N/A	Yes	N/A
Feng (2015)	Gut microbiome development along the colorectal adenoma–carcinoma sequence	Nature Communications	PRJEB7774	SAMEA3136691	Illumina HiSeq 2000	PAIRED	Non-healthy	Colorectal adenoma	68	Female	24.84	6.1	0.8	3.6	N/A	1.9	Yes	No	N/A	Yes	N/A
Feng (2015)	Gut microbiome development along the colorectal adenoma–carcinoma sequence	Nature Communications	PRJEB7774	SAMEA3136713	Illumina HiSeq 2000	PAIRED	Non-healthy	Colorectal adenoma	71	Male	27.04	6.5	1.2	2.8	N/A	1.9	Yes	No	N/A	Yes	N/A
Feng (2015)	Gut microbiome development along the colorectal adenoma–carcinoma sequence	Nature Communications	PRJEB7774	SAMEA3136706	Illumina HiSeq 2000	PAIRED	Non-healthy	Colorectal adenoma	63	Male	30.77	5.4	7.3	4.4	N/A	1.1	Yes	No	N/A	Yes	N/A
Feng (2015)	Gut microbiome development along the colorectal adenoma–carcinoma sequence	Nature Communications	PRJEB7774	SAMEA3136689	Illumina HiSeq 2000	PAIRED	Non-healthy	Colorectal adenoma	72	Female	27.43	5.1	0.7	3.8	N/A	2.2	No	No	N/A	Yes	N/A
Feng (2015)	Gut microbiome development along the colorectal adenoma–carcinoma sequence	Nature Communications	PRJEB7774	SAMEA3136685	Illumina HiSeq 2000	PAIRED	Non-healthy	Colorectal adenoma	78	Female	31.24	5.9	0.6	2.1	N/A	2.1	Yes	No	N/A	Yes	N/A
Feng (2015)	Gut microbiome development along the colorectal adenoma–carcinoma sequence	Nature Communications	PRJEB7774	SAMEA3136716	Illumina HiSeq 2000	PAIRED	Non-healthy	Colorectal adenoma	77	Male	25.7	6.1	0.9	3.3	N/A	1.6	No	Yes	N/A	Yes	N/A
Feng (2015)	Gut microbiome development along the colorectal adenoma–carcinoma sequence	Nature Communications	PRJEB7774	SAMEA3136708	Illumina HiSeq 2000	PAIRED	Non-healthy	Colorectal adenoma	56	Male	29.41	5.6	2.3	5.1	N/A	2.4	Yes	No	N/A	Yes	N/A
Feng (2015)	Gut microbiome development along the colorectal adenoma–carcinoma sequence	Nature Communications	PRJEB7774	SAMEA3136696	Illumina HiSeq 2000	PAIRED	Non-healthy	Colorectal adenoma	83	Female	21.94	6.8	1.2	3.1	N/A	1	Yes	No	N/A	Yes	N/A
Feng (2015)	Gut microbiome development along the colorectal adenoma–carcinoma sequence	Nature Communications	PRJEB7774	SAMEA3136705	Illumina HiSeq 2000	PAIRED	Non-healthy	Colorectal adenoma	67	Male	33.23	6.3	1.5	3.3	N/A	1	Yes	No	N/A	Yes	N/A
Feng (2015)	Gut microbiome development along the colorectal adenoma–carcinoma sequence	Nature Communications	PRJEB7774	SAMEA3136687	Illumina HiSeq 2000	PAIRED	Non-healthy	Colorectal adenoma	60	Female	30	7.1	1.6	5.1	N/A	1.7	Yes	No	N/A	Yes	N/A
Feng (2015)	Gut microbiome development along the colorectal adenoma–carcinoma sequence	Nature Communications	PRJEB7774	SAMEA3136710	Illumina HiSeq 2000	PAIRED	Non-healthy	Colorectal adenoma	67	Male	28.34	6.6	1.2	1.6	N/A	1.5	Yes	No	N/A	Yes	N/A
Feng (2015)	Gut microbiome development along the colorectal adenoma–carcinoma sequence	Nature Communications	PRJEB7774	SAMEA3136721	Illumina HiSeq 2000	PAIRED	Non-healthy	Colorectal adenoma	69	Male	21.46	5.2	1.1	2.1	N/A	1.2	Yes	Yes	N/A	Yes	N/A
Feng (2015)	Gut microbiome development along the colorectal adenoma–carcinoma sequence	Nature Communications	PRJEB7774	SAMEA3136698	Illumina HiSeq 2000	PAIRED	Non-healthy	Colorectal adenoma	64	Female	20.52	4.8	0.4	3.3	N/A	1.5	Yes	No	N/A	Yes	N/A
Feng (2015)	Gut microbiome development along the colorectal adenoma–carcinoma sequence	Nature Communications	PRJEB7774	SAMEA3136695	Illumina HiSeq 2000	PAIRED	Non-healthy	Colorectal adenoma	61	Female	22.8	5.2	0.9	3.7	N/A	3.1	Yes	No	N/A	Yes	N/A
Feng (2015)	Gut microbiome development along the colorectal adenoma–carcinoma sequence	Nature Communications	PRJEB7774	SAMEA3136682	Illumina HiSeq 2000	PAIRED	Non-healthy	Colorectal adenoma	62	Female	32.8	5.6	2.4	2.9	N/A	1.2	Yes	Yes	N/A	Yes	N/A
Feng (2015)	Gut microbiome development along the colorectal adenoma–carcinoma sequence	Nature Communications	PRJEB7774	SAMEA3136711	Illumina HiSeq 2000	PAIRED	Non-healthy	Colorectal adenoma	63	Male	27.4	5.8	1	4.3	N/A	1.4	Yes	No	N/A	Yes	N/A
Feng (2015)	Gut microbiome development along the colorectal adenoma–carcinoma sequence	Nature Communications	PRJEB7774	SAMEA3136683	Illumina HiSeq 2000	PAIRED	Non-healthy	Colorectal adenoma	52	Female	32.8	5.3	1.2	4	N/A	1.8	Yes	Yes	N/A	Yes	N/A
Feng (2015)	Gut microbiome development along the colorectal adenoma–carcinoma sequence	Nature Communications	PRJEB7774	SAMEA3136709	Illumina HiSeq 2000	PAIRED	Non-healthy	Colorectal adenoma	64	Male	29.3	6.4	1.4	3.8	N/A	1.1	Yes	Yes	N/A	Yes	N/A
Feng (2015)	Gut microbiome development along the colorectal adenoma–carcinoma sequence	Nature Communications	PRJEB7774	SAMEA3136694	Illumina HiSeq 2000	PAIRED	Non-healthy	Colorectal adenoma	78	Female	24	6	1.6	3.6	N/A	1.4	Yes	No	N/A	Yes	N/A
Feng (2015)	Gut microbiome development along the colorectal adenoma–carcinoma sequence	Nature Communications	PRJEB7774	SAMEA3136719	Illumina HiSeq 2000	PAIRED	Non-healthy	Colorectal adenoma	71	Male	24.8	8.3	1	3.3	N/A	1.8	Yes	No	N/A	Yes	N/A
Feng (2015)	Gut microbiome development along the colorectal adenoma–carcinoma sequence	Nature Communications	PRJEB7774	SAMEA3136720	Illumina HiSeq 2000	PAIRED	Non-healthy	Colorectal adenoma	58	Male	21.7	5.2	5.4	2.8	N/A	1.7	Yes	Yes	N/A	Yes	N/A
Feng (2015)	Gut microbiome development along the colorectal adenoma–carcinoma sequence	Nature Communications	PRJEB7774	SAMEA3136715	Illumina HiSeq 2000	PAIRED	Non-healthy	Colorectal adenoma	80	Male	26.47	5.2	0.9	3.3	N/A	1.9	Yes	No	N/A	Yes	N/A
Feng (2015)	Gut microbiome development along the colorectal adenoma–carcinoma sequence	Nature Communications	PRJEB7774	SAMEA3136686	Illumina HiSeq 2000	PAIRED	Non-healthy	Colorectal adenoma	75	Female	30.12	6.2	2.4	4.3	N/A	1.4	Yes	No	N/A	Yes	N/A
Feng (2015)	Gut microbiome development along the colorectal adenoma–carcinoma sequence	Nature Communications	PRJEB7774	SAMEA3136717	Illumina HiSeq 2000	PAIRED	Non-healthy	Colorectal adenoma	48	Male	25.61	6.1	0.8	4.2	N/A	2.2	Yes	Yes	N/A	Yes	N/A
Feng (2015)	Gut microbiome development along the colorectal adenoma–carcinoma sequence	Nature Communications	PRJEB7774	SAMEA3136697	Illumina HiSeq 2000	PAIRED	Non-healthy	Colorectal adenoma	56	Female	22.8	7.2	0.7	3.9	N/A	1.7	Yes	Yes	N/A	Yes	N/A
Feng (2015)	Gut microbiome development along the colorectal adenoma–carcinoma sequence	Nature Communications	PRJEB7774	SAMEA3136684	Illumina HiSeq 2000	PAIRED	Non-healthy	Colorectal adenoma	70	Female	25.2	5.9	1	5.3	N/A	1.6	Yes	No	N/A	Yes	N/A
Feng (2015)	Gut microbiome development along the colorectal adenoma–carcinoma sequence	Nature Communications	PRJEB7774	SAMEA3136718	Illumina HiSeq 2000	PAIRED	Non-healthy	Colorectal adenoma	62	Male	24.3	6.1	0.7	2.8	N/A	2.1	Yes	No	N/A	Yes	N/A
Feng (2015)	Gut microbiome development along the colorectal adenoma–carcinoma sequence	Nature Communications	PRJEB7774	SAMEA3136688	Illumina HiSeq 2000	PAIRED	Non-healthy	Colorectal adenoma	63	Female	30.47	6.2	0.8	1	N/A	2.2	Yes	No	N/A	Yes	N/A
Feng (2015)	Gut microbiome development along the colorectal adenoma–carcinoma sequence	Nature Communications	PRJEB7774	SAMEA3136701	Illumina HiSeq 2000	PAIRED	Non-healthy	Colorectal adenoma	77	Male	37.56	8.1	0.8	3	N/A	1.5	Yes	Yes	N/A	Yes	N/A
Feng (2015)	Gut microbiome development along the colorectal adenoma–carcinoma sequence	Nature Communications	PRJEB7774	SAMEA3136699	Illumina HiSeq 2000	PAIRED	Non-healthy	Colorectal adenoma	66	Female	22.65	5.4	1.1	4.6	N/A	2.3	Yes	Yes	N/A	Yes	N/A
Feng (2015)	Gut microbiome development along the colorectal adenoma–carcinoma sequence	Nature Communications	PRJEB7774	SAMEA3136723	Illumina HiSeq 2000	PAIRED	Non-healthy	Colorectal adenoma	74	Female	24.13	5.6	1.8	3.2	N/A	1.3	Yes	No	N/A	Yes	N/A
Feng (2015)	Gut microbiome development along the colorectal adenoma–carcinoma sequence	Nature Communications	PRJEB7774	SAMEA3136700	Illumina HiSeq 2000	PAIRED	Non-healthy	Colorectal adenoma	58	Male	27.02	5.3	1.1	4.3	N/A	2.1	Yes	No	N/A	Yes	N/A
Feng (2015)	Gut microbiome development along the colorectal adenoma–carcinoma sequence	Nature Communications	PRJEB7774	SAMEA3178944	Illumina HiSeq 2000	PAIRED	Non-healthy	Colorectal adenoma	63	Male	25.6489	5.4	1.4	4.9	N/A	2.1	No	No	N/A	Yes	N/A
Feng (2015)	Gut microbiome development along the colorectal adenoma–carcinoma sequence	Nature Communications	PRJEB7774	SAMEA3178942	Illumina HiSeq 2000	PAIRED	Non-healthy	Colorectal adenoma	56	Female	43.5799	5.7	1.4	5.3	N/A	1.3	No	No	N/A	Yes	N/A
Feng (2015)	Gut microbiome development along the colorectal adenoma–carcinoma sequence	Nature Communications	PRJEB7774	SAMEA3178941	Illumina HiSeq 2000	PAIRED	Non-healthy	Colorectal adenoma	68	Female	27.5482	4.9	1.6	4.7	N/A	1.3	Yes	No	N/A	Yes	N/A
Zeller (2014)	Potential of fecal microbiota for early-stage detection of colorectal cancer	Mol Syst Biol	PRJEB6070	SAMEA2467005	Illumina MiSeq	PAIRED	Non-healthy	Colorectal cancer	67	Male	28	N/A	N/A	N/A	N/A	N/A	N/A	N/A	N/A	N/A	N/A
Zeller (2014)	Potential of fecal microbiota for early-stage detection of colorectal cancer	Mol Syst Biol	PRJEB6070	SAMEA2466915	Illumina MiSeq	PAIRED	Non-healthy	Colorectal cancer	58	Male	24	N/A	N/A	N/A	N/A	N/A	N/A	N/A	N/A	N/A	N/A
Zeller (2014)	Potential of fecal microbiota for early-stage detection of colorectal cancer	Mol Syst Biol	PRJEB6070	SAMEA2466919	Illumina MiSeq	PAIRED	Non-healthy	Colorectal adenoma	63	Male	26	N/A	N/A	N/A	N/A	N/A	N/A	N/A	N/A	N/A	N/A
Zeller (2014)	Potential of fecal microbiota for early-stage detection of colorectal cancer	Mol Syst Biol	PRJEB6070	SAMEA2466967	Illumina MiSeq	PAIRED	Non-healthy	Colorectal adenoma	64	Male	26	N/A	N/A	N/A	N/A	N/A	N/A	N/A	N/A	N/A	N/A
Zeller (2014)	Potential of fecal microbiota for early-stage detection of colorectal cancer	Mol Syst Biol	PRJEB6070	SAMEA2466993	Illumina MiSeq	PAIRED	Non-healthy	Colorectal cancer	62	Male	26	N/A	N/A	N/A	N/A	N/A	N/A	N/A	N/A	N/A	N/A
Zeller (2014)	Potential of fecal microbiota for early-stage detection of colorectal cancer	Mol Syst Biol	PRJEB6070	SAMEA2466962	Illumina MiSeq	PAIRED	Non-healthy	Colorectal adenoma	58	Male	22	N/A	N/A	N/A	N/A	N/A	N/A	N/A	N/A	N/A	N/A
Zeller (2014)	Potential of fecal microbiota for early-stage detection of colorectal cancer	Mol Syst Biol	PRJEB6070	SAMEA2467000	Illumina MiSeq	PAIRED	Non-healthy	Colorectal cancer	81	Female	38.71	N/A	N/A	N/A	N/A	N/A	N/A	N/A	N/A	N/A	N/A
Zeller (2014)	Potential of fecal microbiota for early-stage detection of colorectal cancer	Mol Syst Biol	PRJEB6070	SAMEA2466973	Illumina MiSeq	PAIRED	Non-healthy	Colorectal cancer	51	Male	30	N/A	N/A	N/A	N/A	N/A	N/A	N/A	N/A	N/A	N/A
Zeller (2014)	Potential of fecal microbiota for early-stage detection of colorectal cancer	Mol Syst Biol	PRJEB6070	SAMEA2466941	Illumina MiSeq	PAIRED	Non-healthy	Colorectal cancer	59	Female	20	N/A	N/A	N/A	N/A	N/A	N/A	N/A	N/A	N/A	N/A
Zeller (2014)	Potential of fecal microbiota for early-stage detection of colorectal cancer	Mol Syst Biol	PRJEB6070	SAMEA2467009	Illumina MiSeq	PAIRED	Non-healthy	Colorectal cancer	56	Female	N/A	N/A	N/A	N/A	N/A	N/A	N/A	N/A	N/A	N/A	N/A
Zeller (2014)	Potential of fecal microbiota for early-stage detection of colorectal cancer	Mol Syst Biol	PRJEB6070	SAMEA2466904	Illumina MiSeq	PAIRED	Non-healthy	Colorectal cancer	72	Female	37	N/A	N/A	N/A	N/A	N/A	N/A	N/A	N/A	N/A	N/A
Zeller (2014)	Potential of fecal microbiota for early-stage detection of colorectal cancer	Mol Syst Biol	PRJEB6070	SAMEA2466893	Illumina MiSeq	PAIRED	Non-healthy	Colorectal adenoma	68	Male	23	N/A	N/A	N/A	N/A	N/A	N/A	N/A	N/A	N/A	N/A
Zeller (2014)	Potential of fecal microbiota for early-stage detection of colorectal cancer	Mol Syst Biol	PRJEB6070	SAMEA2466942	Illumina MiSeq	PAIRED	Non-healthy	Colorectal cancer	63	Male	25	N/A	N/A	N/A	N/A	N/A	N/A	N/A	N/A	N/A	N/A
Zeller (2014)	Potential of fecal microbiota for early-stage detection of colorectal cancer	Mol Syst Biol	PRJEB6070	SAMEA2466910	Illumina MiSeq	PAIRED	Non-healthy	Colorectal adenoma	62	Male	29	N/A	N/A	N/A	N/A	N/A	N/A	N/A	N/A	N/A	N/A
Zeller (2014)	Potential of fecal microbiota for early-stage detection of colorectal cancer	Mol Syst Biol	PRJEB6070	SAMEA2466997	Illumina MiSeq	PAIRED	Non-healthy	Colorectal cancer	82	Male	24.49	N/A	N/A	N/A	N/A	N/A	N/A	N/A	N/A	N/A	N/A
Zeller (2014)	Potential of fecal microbiota for early-stage detection of colorectal cancer	Mol Syst Biol	PRJEB6070	SAMEA2467003	Illumina MiSeq	PAIRED	Non-healthy	Colorectal adenoma	77	Male	23	N/A	N/A	N/A	N/A	N/A	N/A	N/A	N/A	N/A	N/A
Zeller (2014)	Potential of fecal microbiota for early-stage detection of colorectal cancer	Mol Syst Biol	PRJEB6070	SAMEA2466957	Illumina MiSeq	PAIRED	Non-healthy	Colorectal cancer	60	Male	26	N/A	N/A	N/A	N/A	N/A	N/A	N/A	N/A	N/A	N/A
Zeller (2014)	Potential of fecal microbiota for early-stage detection of colorectal cancer	Mol Syst Biol	PRJEB6070	SAMEA2466987	Illumina MiSeq	PAIRED	Non-healthy	Colorectal cancer	69	Female	24	N/A	N/A	N/A	N/A	N/A	N/A	N/A	N/A	N/A	N/A
Zeller (2014)	Potential of fecal microbiota for early-stage detection of colorectal cancer	Mol Syst Biol	PRJEB6070	SAMEA2466929	Illumina MiSeq	PAIRED	Non-healthy	Colorectal adenoma	59	Male	31	N/A	N/A	N/A	N/A	N/A	N/A	N/A	N/A	N/A	N/A
Zeller (2014)	Potential of fecal microbiota for early-stage detection of colorectal cancer	Mol Syst Biol	PRJEB6070	SAMEA2466943	Illumina MiSeq	PAIRED	Non-healthy	Colorectal adenoma	60	Male	27	N/A	N/A	N/A	N/A	N/A	N/A	N/A	N/A	N/A	N/A
Zeller (2014)	Potential of fecal microbiota for early-stage detection of colorectal cancer	Mol Syst Biol	PRJEB6070	SAMEA2466939	Illumina MiSeq	PAIRED	Non-healthy	Colorectal adenoma	89	Male	24	N/A	N/A	N/A	N/A	N/A	N/A	N/A	N/A	N/A	N/A
Zeller (2014)	Potential of fecal microbiota for early-stage detection of colorectal cancer	Mol Syst Biol	PRJEB6070	SAMEA2466971	Illumina MiSeq	PAIRED	Non-healthy	Colorectal adenoma	66	Male	24	N/A	N/A	N/A	N/A	N/A	N/A	N/A	N/A	N/A	N/A
Zeller (2014)	Potential of fecal microbiota for early-stage detection of colorectal cancer	Mol Syst Biol	PRJEB6070	SAMEA2466959	Illumina MiSeq	PAIRED	Non-healthy	Colorectal adenoma	53	Male	30	N/A	N/A	N/A	N/A	N/A	N/A	N/A	N/A	N/A	N/A
Zeller (2014)	Potential of fecal microbiota for early-stage detection of colorectal cancer	Mol Syst Biol	PRJEB6070	SAMEA2466972	Illumina MiSeq	PAIRED	Non-healthy	Colorectal cancer	64	Male	21	N/A	N/A	N/A	N/A	N/A	N/A	N/A	N/A	N/A	N/A
Zeller (2014)	Potential of fecal microbiota for early-stage detection of colorectal cancer	Mol Syst Biol	PRJEB6070	SAMEA2466944	Illumina MiSeq	PAIRED	Non-healthy	Colorectal cancer	80	Male	29.4	N/A	N/A	N/A	N/A	N/A	N/A	N/A	N/A	N/A	N/A
Zeller (2014)	Potential of fecal microbiota for early-stage detection of colorectal cancer	Mol Syst Biol	PRJEB6070	SAMEA2466953	Illumina MiSeq	PAIRED	Non-healthy	Colorectal adenoma	62	Female	21	N/A	N/A	N/A	N/A	N/A	N/A	N/A	N/A	N/A	N/A
Zeller (2014)	Potential of fecal microbiota for early-stage detection of colorectal cancer	Mol Syst Biol	PRJEB6070	SAMEA2466996	Illumina MiSeq	PAIRED	Non-healthy	Colorectal cancer	73	Male	40	N/A	N/A	N/A	N/A	N/A	N/A	N/A	N/A	N/A	N/A
Zeller (2014)	Potential of fecal microbiota for early-stage detection of colorectal cancer	Mol Syst Biol	PRJEB6070	SAMEA2466952	Illumina MiSeq	PAIRED	Non-healthy	Colorectal adenoma	59	Female	21	N/A	N/A	N/A	N/A	N/A	N/A	N/A	N/A	N/A	N/A
Zeller (2014)	Potential of fecal microbiota for early-stage detection of colorectal cancer	Mol Syst Biol	PRJEB6070	SAMEA2466984	Illumina MiSeq	PAIRED	Non-healthy	Colorectal cancer	79	Female	22	N/A	N/A	N/A	N/A	N/A	N/A	N/A	N/A	N/A	N/A
Zeller (2014)	Potential of fecal microbiota for early-stage detection of colorectal cancer	Mol Syst Biol	PRJEB6070	SAMEA2466916	Illumina MiSeq	PAIRED	Non-healthy	Colorectal cancer	87	Female	32.42	N/A	N/A	N/A	N/A	N/A	N/A	N/A	N/A	N/A	N/A
Zeller (2014)	Potential of fecal microbiota for early-stage detection of colorectal cancer	Mol Syst Biol	PRJEB6070	SAMEA2466931	Illumina MiSeq	PAIRED	Non-healthy	Colorectal cancer	73	Female	24	N/A	N/A	N/A	N/A	N/A	N/A	N/A	N/A	N/A	N/A
Zeller (2014)	Potential of fecal microbiota for early-stage detection of colorectal cancer	Mol Syst Biol	PRJEB6070	SAMEA2466998	Illumina MiSeq	PAIRED	Non-healthy	Colorectal cancer	74	Female	19	N/A	N/A	N/A	N/A	N/A	N/A	N/A	N/A	N/A	N/A
Zeller (2014)	Potential of fecal microbiota for early-stage detection of colorectal cancer	Mol Syst Biol	PRJEB6070	SAMEA2466947	Illumina MiSeq	PAIRED	Non-healthy	Colorectal cancer	78	Male	19	N/A	N/A	N/A	N/A	N/A	N/A	N/A	N/A	N/A	N/A
Zeller (2014)	Potential of fecal microbiota for early-stage detection of colorectal cancer	Mol Syst Biol	PRJEB6070	SAMEA2466974	Illumina MiSeq	PAIRED	Non-healthy	Colorectal adenoma	59	Female	N/A	N/A	N/A	N/A	N/A	N/A	N/A	N/A	N/A	N/A	N/A
Zeller (2014)	Potential of fecal microbiota for early-stage detection of colorectal cancer	Mol Syst Biol	PRJEB6070	SAMEA2466905	Illumina MiSeq	PAIRED	Non-healthy	Colorectal adenoma	48	Female	21	N/A	N/A	N/A	N/A	N/A	N/A	N/A	N/A	N/A	N/A
Zeller (2014)	Potential of fecal microbiota for early-stage detection of colorectal cancer	Mol Syst Biol	PRJEB6070	SAMEA2466966	Illumina MiSeq	PAIRED	Non-healthy	Colorectal adenoma	66	Male	22	N/A	N/A	N/A	N/A	N/A	N/A	N/A	N/A	N/A	N/A
Zeller (2014)	Potential of fecal microbiota for early-stage detection of colorectal cancer	Mol Syst Biol	PRJEB6070	SAMEA2466989	Illumina MiSeq	PAIRED	Non-healthy	Colorectal cancer	75	Male	37	N/A	N/A	N/A	N/A	N/A	N/A	N/A	N/A	N/A	N/A
Zeller (2014)	Potential of fecal microbiota for early-stage detection of colorectal cancer	Mol Syst Biol	PRJEB6070	SAMEA2467002	Illumina MiSeq	PAIRED	Non-healthy	Colorectal cancer	65	Male	24	N/A	N/A	N/A	N/A	N/A	N/A	N/A	N/A	N/A	N/A
Zeller (2014)	Potential of fecal microbiota for early-stage detection of colorectal cancer	Mol Syst Biol	PRJEB6070	SAMEA2467007	Illumina MiSeq	PAIRED	Non-healthy	Colorectal cancer	54	Female	22	N/A	N/A	N/A	N/A	N/A	N/A	N/A	N/A	N/A	N/A
Zeller (2014)	Potential of fecal microbiota for early-stage detection of colorectal cancer	Mol Syst Biol	PRJEB6070	SAMEA2466976	Illumina MiSeq	PAIRED	Non-healthy	Colorectal cancer	67	Male	25	N/A	N/A	N/A	N/A	N/A	N/A	N/A	N/A	N/A	N/A
Zeller (2014)	Potential of fecal microbiota for early-stage detection of colorectal cancer	Mol Syst Biol	PRJEB6070	SAMEA2466895	Illumina MiSeq	PAIRED	Non-healthy	Colorectal adenoma	63	Male	27	N/A	N/A	N/A	N/A	N/A	N/A	N/A	N/A	N/A	N/A
Zeller (2014)	Potential of fecal microbiota for early-stage detection of colorectal cancer	Mol Syst Biol	PRJEB6070	SAMEA2466958	Illumina MiSeq	PAIRED	Non-healthy	Colorectal adenoma	72	Female	32	N/A	N/A	N/A	N/A	N/A	N/A	N/A	N/A	N/A	N/A
Zeller (2014)	Potential of fecal microbiota for early-stage detection of colorectal cancer	Mol Syst Biol	PRJEB6070	SAMEA2467006	Illumina MiSeq	PAIRED	Non-healthy	Colorectal adenoma	52	Female	23	N/A	N/A	N/A	N/A	N/A	N/A	N/A	N/A	N/A	N/A
Zeller (2014)	Potential of fecal microbiota for early-stage detection of colorectal cancer	Mol Syst Biol	PRJEB6070	SAMEA2466908	Illumina MiSeq	PAIRED	Non-healthy	Colorectal cancer	62	Female	21	N/A	N/A	N/A	N/A	N/A	N/A	N/A	N/A	N/A	N/A
Zeller (2014)	Potential of fecal microbiota for early-stage detection of colorectal cancer	Mol Syst Biol	PRJEB6070	SAMEA2466954	Illumina MiSeq	PAIRED	Non-healthy	Colorectal cancer	87	Female	15.15	N/A	N/A	N/A	N/A	N/A	N/A	N/A	N/A	N/A	N/A
Zeller (2014)	Potential of fecal microbiota for early-stage detection of colorectal cancer	Mol Syst Biol	PRJEB6070	SAMEA2466920	Illumina MiSeq	PAIRED	Non-healthy	Colorectal adenoma	53	Female	33	N/A	N/A	N/A	N/A	N/A	N/A	N/A	N/A	N/A	N/A
Zeller (2014)	Potential of fecal microbiota for early-stage detection of colorectal cancer	Mol Syst Biol	PRJEB6070	SAMEA2466950	Illumina MiSeq	PAIRED	Non-healthy	Colorectal adenoma	60	Female	26	N/A	N/A	N/A	N/A	N/A	N/A	N/A	N/A	N/A	N/A
Zeller (2014)	Potential of fecal microbiota for early-stage detection of colorectal cancer	Mol Syst Biol	PRJEB6070	SAMEA2466899	Illumina MiSeq	PAIRED	Non-healthy	Colorectal adenoma	63	Male	26	N/A	N/A	N/A	N/A	N/A	N/A	N/A	N/A	N/A	N/A
Zeller (2014)	Potential of fecal microbiota for early-stage detection of colorectal cancer	Mol Syst Biol	PRJEB6070	SAMEA2466949	Illumina MiSeq	PAIRED	Non-healthy	Colorectal adenoma	64	Male	28	N/A	N/A	N/A	N/A	N/A	N/A	N/A	N/A	N/A	N/A
Zeller (2014)	Potential of fecal microbiota for early-stage detection of colorectal cancer	Mol Syst Biol	PRJEB6070	SAMEA2467004	Illumina MiSeq	PAIRED	Non-healthy	Colorectal cancer	53	Male	25	N/A	N/A	N/A	N/A	N/A	N/A	N/A	N/A	N/A	N/A
Zeller (2014)	Potential of fecal microbiota for early-stage detection of colorectal cancer	Mol Syst Biol	PRJEB6070	SAMEA2466963	Illumina MiSeq	PAIRED	Non-healthy	Colorectal cancer	72	Male	22	N/A	N/A	N/A	N/A	N/A	N/A	N/A	N/A	N/A	N/A
Zeller (2014)	Potential of fecal microbiota for early-stage detection of colorectal cancer	Mol Syst Biol	PRJEB6070	SAMEA2466930	Illumina MiSeq	PAIRED	Non-healthy	Colorectal cancer	76	Male	N/A	N/A	N/A	N/A	N/A	N/A	N/A	N/A	N/A	N/A	N/A
Zeller (2014)	Potential of fecal microbiota for early-stage detection of colorectal cancer	Mol Syst Biol	PRJEB6070	SAMEA2466975	Illumina MiSeq	PAIRED	Non-healthy	Colorectal adenoma	45	Male	24	N/A	N/A	N/A	N/A	N/A	N/A	N/A	N/A	N/A	N/A
Zeller (2014)	Potential of fecal microbiota for early-stage detection of colorectal cancer	Mol Syst Biol	PRJEB6070	SAMEA2467008	Illumina MiSeq	PAIRED	Non-healthy	Colorectal adenoma	52	Male	33	N/A	N/A	N/A	N/A	N/A	N/A	N/A	N/A	N/A	N/A
Zeller (2014)	Potential of fecal microbiota for early-stage detection of colorectal cancer	Mol Syst Biol	PRJEB6070	SAMEA2466986	Illumina MiSeq	PAIRED	Non-healthy	Colorectal cancer	64	Male	30	N/A	N/A	N/A	N/A	N/A	N/A	N/A	N/A	N/A	N/A
Zeller (2014)	Potential of fecal microbiota for early-stage detection of colorectal cancer	Mol Syst Biol	PRJEB6070	SAMEA2466994	Illumina MiSeq	PAIRED	Non-healthy	Colorectal adenoma	45	Female	24	N/A	N/A	N/A	N/A	N/A	N/A	N/A	N/A	N/A	N/A
Zeller (2014)	Potential of fecal microbiota for early-stage detection of colorectal cancer	Mol Syst Biol	PRJEB6070	SAMEA2466906	Illumina MiSeq	PAIRED	Non-healthy	Colorectal adenoma	68	Male	21	N/A	N/A	N/A	N/A	N/A	N/A	N/A	N/A	N/A	N/A
Zeller (2014)	Potential of fecal microbiota for early-stage detection of colorectal cancer	Mol Syst Biol	PRJEB6070	SAMEA2466926	Illumina MiSeq	PAIRED	Non-healthy	Colorectal cancer	70	Female	26	N/A	N/A	N/A	N/A	N/A	N/A	N/A	N/A	N/A	N/A
Zeller (2014)	Potential of fecal microbiota for early-stage detection of colorectal cancer	Mol Syst Biol	PRJEB6070	SAMEA2466968	Illumina MiSeq	PAIRED	Non-healthy	Colorectal cancer	80	Female	23.19	N/A	N/A	N/A	N/A	N/A	N/A	N/A	N/A	N/A	N/A
Zeller (2014)	Potential of fecal microbiota for early-stage detection of colorectal cancer	Mol Syst Biol	PRJEB6070	SAMEA2466999	Illumina MiSeq	PAIRED	Non-healthy	Colorectal adenoma	76	Female	34	N/A	N/A	N/A	N/A	N/A	N/A	N/A	N/A	N/A	N/A
Zeller (2014)	Potential of fecal microbiota for early-stage detection of colorectal cancer	Mol Syst Biol	PRJEB6070	SAMEA2466938	Illumina MiSeq	PAIRED	Non-healthy	Colorectal cancer	76	Male	25	N/A	N/A	N/A	N/A	N/A	N/A	N/A	N/A	N/A	N/A
Zeller (2014)	Potential of fecal microbiota for early-stage detection of colorectal cancer	Mol Syst Biol	PRJEB6070	SAMEA2466991	Illumina MiSeq	PAIRED	Non-healthy	Colorectal cancer	68	Male	23	N/A	N/A	N/A	N/A	N/A	N/A	N/A	N/A	N/A	N/A
Zeller (2014)	Potential of fecal microbiota for early-stage detection of colorectal cancer	Mol Syst Biol	PRJEB6070	SAMEA2466990	Illumina MiSeq	PAIRED	Non-healthy	Colorectal cancer	69	Female	25	N/A	N/A	N/A	N/A	N/A	N/A	N/A	N/A	N/A	N/A
Zeller (2014)	Potential of fecal microbiota for early-stage detection of colorectal cancer	Mol Syst Biol	PRJEB6070	SAMEA2466995	Illumina MiSeq	PAIRED	Non-healthy	Colorectal adenoma	55	Male	24	N/A	N/A	N/A	N/A	N/A	N/A	N/A	N/A	N/A	N/A
Zeller (2014)	Potential of fecal microbiota for early-stage detection of colorectal cancer	Mol Syst Biol	PRJEB6070	SAMEA2466928	Illumina MiSeq	PAIRED	Non-healthy	Colorectal cancer	50	Female	24	N/A	N/A	N/A	N/A	N/A	N/A	N/A	N/A	N/A	N/A
Zeller (2014)	Potential of fecal microbiota for early-stage detection of colorectal cancer	Mol Syst Biol	PRJEB6070	SAMEA2467001	Illumina MiSeq	PAIRED	Non-healthy	Colorectal cancer	74	Female	26	N/A	N/A	N/A	N/A	N/A	N/A	N/A	N/A	N/A	N/A
Zeller (2014)	Potential of fecal microbiota for early-stage detection of colorectal cancer	Mol Syst Biol	PRJEB6070	SAMEA2466977	Illumina MiSeq	PAIRED	Non-healthy	Colorectal adenoma	68	Male	36	N/A	N/A	N/A	N/A	N/A	N/A	N/A	N/A	N/A	N/A
Zeller (2014)	Potential of fecal microbiota for early-stage detection of colorectal cancer	Mol Syst Biol	PRJEB6070	SAMEA2466946	Illumina MiSeq	PAIRED	Non-healthy	Colorectal cancer	44	Male	20	N/A	N/A	N/A	N/A	N/A	N/A	N/A	N/A	N/A	N/A
Zeller (2014)	Potential of fecal microbiota for early-stage detection of colorectal cancer	Mol Syst Biol	PRJEB6070	SAMEA2466918	Illumina MiSeq	PAIRED	Non-healthy	Colorectal adenoma	73	Male	26	N/A	N/A	N/A	N/A	N/A	N/A	N/A	N/A	N/A	N/A
Zeller (2014)	Potential of fecal microbiota for early-stage detection of colorectal cancer	Mol Syst Biol	PRJEB6070	SAMEA2466992	Illumina MiSeq	PAIRED	Non-healthy	Colorectal cancer	65	Male	26	N/A	N/A	N/A	N/A	N/A	N/A	N/A	N/A	N/A	N/A
Zeller (2014)	Potential of fecal microbiota for early-stage detection of colorectal cancer	Mol Syst Biol	PRJEB6070	SAMEA2466988	Illumina MiSeq	PAIRED	Non-healthy	Colorectal cancer	69	Female	30	N/A	N/A	N/A	N/A	N/A	N/A	N/A	N/A	N/A	N/A
Zeller (2014)	Potential of fecal microbiota for early-stage detection of colorectal cancer	Mol Syst Biol	PRJEB6070	SAMEA2466960	Illumina MiSeq	PAIRED	Non-healthy	Colorectal adenoma	49	Male	20	N/A	N/A	N/A	N/A	N/A	N/A	N/A	N/A	N/A	N/A
Zeller (2014)	Potential of fecal microbiota for early-stage detection of colorectal cancer	Mol Syst Biol	PRJEB6070	SAMEA2466935	Illumina MiSeq	PAIRED	Non-healthy	Colorectal adenoma	68	Male	26	N/A	N/A	N/A	N/A	N/A	N/A	N/A	N/A	N/A	N/A
Zeller (2014)	Potential of fecal microbiota for early-stage detection of colorectal cancer	Mol Syst Biol	PRJEB6070	SAMEA2466932	Illumina MiSeq	PAIRED	Non-healthy	Colorectal cancer	59	Male	27	N/A	N/A	N/A	N/A	N/A	N/A	N/A	N/A	N/A	N/A
Zeller (2014)	Potential of fecal microbiota for early-stage detection of colorectal cancer	Mol Syst Biol	PRJEB6070	SAMEA2466970	Illumina MiSeq	PAIRED	Non-healthy	Colorectal cancer	51	Male	24	N/A	N/A	N/A	N/A	N/A	N/A	N/A	N/A	N/A	N/A
Zeller (2014)	Potential of fecal microbiota for early-stage detection of colorectal cancer	Mol Syst Biol	PRJEB6070	SAMEA2466951	Illumina MiSeq	PAIRED	Non-healthy	Colorectal adenoma	66	Male	29	N/A	N/A	N/A	N/A	N/A	N/A	N/A	N/A	N/A	N/A
Zeller (2014)	Potential of fecal microbiota for early-stage detection of colorectal cancer	Mol Syst Biol	PRJEB6070	SAMEA2466924	Illumina MiSeq	PAIRED	Non-healthy	Colorectal adenoma	60	Male	24	N/A	N/A	N/A	N/A	N/A	N/A	N/A	N/A	N/A	N/A
Zeller (2014)	Potential of fecal microbiota for early-stage detection of colorectal cancer	Mol Syst Biol	PRJEB6070	SAMEA2466937	Illumina MiSeq	PAIRED	Non-healthy	Colorectal cancer	48	Female	24	N/A	N/A	N/A	N/A	N/A	N/A	N/A	N/A	N/A	N/A
Zeller (2014)	Potential of fecal microbiota for early-stage detection of colorectal cancer	Mol Syst Biol	PRJEB6070	SAMEA2466983	Illumina MiSeq	PAIRED	Non-healthy	Colorectal cancer	45	Female	28	N/A	N/A	N/A	N/A	N/A	N/A	N/A	N/A	N/A	N/A
Zeller (2014)	Potential of fecal microbiota for early-stage detection of colorectal cancer	Mol Syst Biol	PRJEB6070	SAMEA2466917	Illumina MiSeq	PAIRED	Non-healthy	Colorectal cancer	63	Male	22	N/A	N/A	N/A	N/A	N/A	N/A	N/A	N/A	N/A	N/A
Zeller (2014)	Potential of fecal microbiota for early-stage detection of colorectal cancer	Mol Syst Biol	PRJEB6070	SAMEA2466934	Illumina MiSeq	PAIRED	Non-healthy	Colorectal cancer	85	Female	20.31	N/A	N/A	N/A	N/A	N/A	N/A	N/A	N/A	N/A	N/A
Zeller (2014)	Potential of fecal microbiota for early-stage detection of colorectal cancer	Mol Syst Biol	PRJEB6070	SAMEA2466922	Illumina MiSeq	PAIRED	Non-healthy	Colorectal cancer	79	Male	30	N/A	N/A	N/A	N/A	N/A	N/A	N/A	N/A	N/A	N/A
Zeller (2014)	Potential of fecal microbiota for early-stage detection of colorectal cancer	Mol Syst Biol	PRJEB6070	SAMEA2466956	Illumina MiSeq	PAIRED	Non-healthy	Colorectal cancer	73	Male	17	N/A	N/A	N/A	N/A	N/A	N/A	N/A	N/A	N/A	N/A
Zeller (2014)	Potential of fecal microbiota for early-stage detection of colorectal cancer	Mol Syst Biol	PRJEB6070	SAMEA2466914	Illumina MiSeq	PAIRED	Non-healthy	Colorectal adenoma	71	Male	29	N/A	N/A	N/A	N/A	N/A	N/A	N/A	N/A	N/A	N/A
Zeller (2014)	Potential of fecal microbiota for early-stage detection of colorectal cancer	Mol Syst Biol	PRJEB6070	SAMEA2466936	Illumina MiSeq	PAIRED	Non-healthy	Colorectal cancer	73	Female	26	N/A	N/A	N/A	N/A	N/A	N/A	N/A	N/A	N/A	N/A
Zeller (2014)	Potential of fecal microbiota for early-stage detection of colorectal cancer	Mol Syst Biol	PRJEB6070	SAMEA2466945	Illumina MiSeq	PAIRED	Non-healthy	Colorectal adenoma	78	Female	23	N/A	N/A	N/A	N/A	N/A	N/A	N/A	N/A	N/A	N/A
Zeller (2014)	Potential of fecal microbiota for early-stage detection of colorectal cancer	Mol Syst Biol	PRJEB6070	SAMEA2466925	Illumina MiSeq	PAIRED	Non-healthy	Colorectal adenoma	63	Male	30	N/A	N/A	N/A	N/A	N/A	N/A	N/A	N/A	N/A	N/A
Zeller (2014)	Potential of fecal microbiota for early-stage detection of colorectal cancer	Mol Syst Biol	PRJEB6070	SAMEA2466921	Illumina MiSeq	PAIRED	Non-healthy	Colorectal adenoma	71	Female	22	N/A	N/A	N/A	N/A	N/A	N/A	N/A	N/A	N/A	N/A
Zeller (2014)	Potential of fecal microbiota for early-stage detection of colorectal cancer	Mol Syst Biol	PRJEB6070	SAMEA2466927	Illumina MiSeq	PAIRED	Non-healthy	Colorectal cancer	63	Male	31	N/A	N/A	N/A	N/A	N/A	N/A	N/A	N/A	N/A	N/A
Zeller (2014)	Potential of fecal microbiota for early-stage detection of colorectal cancer	Mol Syst Biol	PRJEB6070	SAMEA2466923	Illumina MiSeq	PAIRED	Non-healthy	Colorectal adenoma	64	Male	28	N/A	N/A	N/A	N/A	N/A	N/A	N/A	N/A	N/A	N/A
Zeller (2014)	Potential of fecal microbiota for early-stage detection of colorectal cancer	Mol Syst Biol	PRJEB6070	SAMEA2466969	Illumina MiSeq	PAIRED	Non-healthy	Colorectal adenoma	66	Male	20	N/A	N/A	N/A	N/A	N/A	N/A	N/A	N/A	N/A	N/A
Zeller (2014)	Potential of fecal microbiota for early-stage detection of colorectal cancer	Mol Syst Biol	PRJEB6070	SAMEA2466948	Illumina MiSeq	PAIRED	Non-healthy	Colorectal cancer	63	Male	29	N/A	N/A	N/A	N/A	N/A	N/A	N/A	N/A	N/A	N/A
Zeller (2014)	Potential of fecal microbiota for early-stage detection of colorectal cancer	Mol Syst Biol	PRJEB6070	SAMEA2466964	Illumina MiSeq	PAIRED	Non-healthy	Colorectal cancer	55	Female	25	N/A	N/A	N/A	N/A	N/A	N/A	N/A	N/A	N/A	N/A
Zeller (2014)	Potential of fecal microbiota for early-stage detection of colorectal cancer	Mol Syst Biol	PRJEB6070	SAMEA2467066	Illumina MiSeq	PAIRED	Non-healthy	Colorectal cancer	42	Female	34.8	N/A	N/A	N/A	N/A	N/A	N/A	N/A	N/A	N/A	N/A
Zeller (2014)	Potential of fecal microbiota for early-stage detection of colorectal cancer	Mol Syst Biol	PRJEB6070	SAMEA2467077	Illumina MiSeq	PAIRED	Non-healthy	Colorectal cancer	75	Male	27.8	N/A	N/A	N/A	N/A	N/A	N/A	N/A	N/A	N/A	N/A
Zeller (2014)	Potential of fecal microbiota for early-stage detection of colorectal cancer	Mol Syst Biol	PRJEB6070	SAMEA2467065	Illumina MiSeq	PAIRED	Non-healthy	Colorectal cancer	66	Female	23	N/A	N/A	N/A	N/A	N/A	N/A	N/A	N/A	N/A	N/A
Zeller (2014)	Potential of fecal microbiota for early-stage detection of colorectal cancer	Mol Syst Biol	PRJEB6070	SAMEA2467064	Illumina MiSeq	PAIRED	Non-healthy	Colorectal cancer	56	Male	26.8	N/A	N/A	N/A	N/A	N/A	N/A	N/A	N/A	N/A	N/A
Zeller (2014)	Potential of fecal microbiota for early-stage detection of colorectal cancer	Mol Syst Biol	PRJEB6070	SAMEA2467063	Illumina MiSeq	PAIRED	Non-healthy	Colorectal cancer	74	Male	25.5	N/A	N/A	N/A	N/A	N/A	N/A	N/A	N/A	N/A	N/A
Zeller (2014)	Potential of fecal microbiota for early-stage detection of colorectal cancer	Mol Syst Biol	PRJEB6070	SAMEA2467078	Illumina MiSeq	PAIRED	Non-healthy	Colorectal cancer	63	Male	25.3	N/A	N/A	N/A	N/A	N/A	N/A	N/A	N/A	N/A	N/A
Zeller (2014)	Potential of fecal microbiota for early-stage detection of colorectal cancer	Mol Syst Biol	PRJEB6070	SAMEA2467062	Illumina MiSeq	PAIRED	Non-healthy	Colorectal cancer	53	Female	32	N/A	N/A	N/A	N/A	N/A	N/A	N/A	N/A	N/A	N/A
Zeller (2014)	Potential of fecal microbiota for early-stage detection of colorectal cancer	Mol Syst Biol	PRJEB6070	SAMEA2467061	Illumina MiSeq	PAIRED	Non-healthy	Colorectal cancer	69	Male	27.8	N/A	N/A	N/A	N/A	N/A	N/A	N/A	N/A	N/A	N/A
Zeller (2014)	Potential of fecal microbiota for early-stage detection of colorectal cancer	Mol Syst Biol	PRJEB6070	SAMEA2467060	Illumina MiSeq	PAIRED	Non-healthy	Colorectal cancer	72	Female	24.3	N/A	N/A	N/A	N/A	N/A	N/A	N/A	N/A	N/A	N/A
Zeller (2014)	Potential of fecal microbiota for early-stage detection of colorectal cancer	Mol Syst Biol	PRJEB6070	SAMEA2467072	Illumina MiSeq	PAIRED	Non-healthy	Colorectal cancer	62	Male	21.7	N/A	N/A	N/A	N/A	N/A	N/A	N/A	N/A	N/A	N/A
Zeller (2014)	Potential of fecal microbiota for early-stage detection of colorectal cancer	Mol Syst Biol	PRJEB6070	SAMEA2467059	Illumina MiSeq	PAIRED	Non-healthy	Colorectal cancer	66	Male	25.5	N/A	N/A	N/A	N/A	N/A	N/A	N/A	N/A	N/A	N/A
Zeller (2014)	Potential of fecal microbiota for early-stage detection of colorectal cancer	Mol Syst Biol	PRJEB6070	SAMEA2467058	Illumina MiSeq	PAIRED	Non-healthy	Colorectal cancer	42	Male	27.4	N/A	N/A	N/A	N/A	N/A	N/A	N/A	N/A	N/A	N/A
Zeller (2014)	Potential of fecal microbiota for early-stage detection of colorectal cancer	Mol Syst Biol	PRJEB6070	SAMEA2467057	Illumina MiSeq	PAIRED	Non-healthy	Colorectal cancer	41	Male	21.9	N/A	N/A	N/A	N/A	N/A	N/A	N/A	N/A	N/A	N/A
Zeller (2014)	Potential of fecal microbiota for early-stage detection of colorectal cancer	Mol Syst Biol	PRJEB6070	SAMEA2467056	Illumina MiSeq	PAIRED	Non-healthy	Colorectal cancer	71	Male	29.7	N/A	N/A	N/A	N/A	N/A	N/A	N/A	N/A	N/A	N/A
Zeller (2014)	Potential of fecal microbiota for early-stage detection of colorectal cancer	Mol Syst Biol	PRJEB6070	SAMEA2467068	Illumina MiSeq	PAIRED	Non-healthy	Colorectal cancer	65	Male	27.7	N/A	N/A	N/A	N/A	N/A	N/A	N/A	N/A	N/A	N/A
Zeller (2014)	Potential of fecal microbiota for early-stage detection of colorectal cancer	Mol Syst Biol	PRJEB6070	SAMEA2467055	Illumina MiSeq	PAIRED	Non-healthy	Colorectal cancer	87	Male	22	N/A	N/A	N/A	N/A	N/A	N/A	N/A	N/A	N/A	N/A
Zeller (2014)	Potential of fecal microbiota for early-stage detection of colorectal cancer	Mol Syst Biol	PRJEB6070	SAMEA2467073	Illumina MiSeq	PAIRED	Non-healthy	Colorectal cancer	62	Female	26.6	N/A	N/A	N/A	N/A	N/A	N/A	N/A	N/A	N/A	N/A
Zeller (2014)	Potential of fecal microbiota for early-stage detection of colorectal cancer	Mol Syst Biol	PRJEB6070	SAMEA2467054	Illumina MiSeq	PAIRED	Non-healthy	Colorectal cancer	59	Male	23.7	N/A	N/A	N/A	N/A	N/A	N/A	N/A	N/A	N/A	N/A
Zeller (2014)	Potential of fecal microbiota for early-stage detection of colorectal cancer	Mol Syst Biol	PRJEB6070	SAMEA2467080	Illumina MiSeq	PAIRED	Non-healthy	Colorectal cancer	69	Male	24.3072	N/A	N/A	N/A	N/A	N/A	N/A	N/A	N/A	N/A	N/A
Zeller (2014)	Potential of fecal microbiota for early-stage detection of colorectal cancer	Mol Syst Biol	PRJEB6070	SAMEA2467053	Illumina MiSeq	PAIRED	Non-healthy	Colorectal cancer	58	Female	32.4	N/A	N/A	N/A	N/A	N/A	N/A	N/A	N/A	N/A	N/A
Zeller (2014)	Potential of fecal microbiota for early-stage detection of colorectal cancer	Mol Syst Biol	PRJEB6070	SAMEA2467076	Illumina MiSeq	PAIRED	Non-healthy	Colorectal cancer	35	Female	22.3	N/A	N/A	N/A	N/A	N/A	N/A	N/A	N/A	N/A	N/A
Zeller (2014)	Potential of fecal microbiota for early-stage detection of colorectal cancer	Mol Syst Biol	PRJEB6070	SAMEA2467070	Illumina MiSeq	PAIRED	Non-healthy	Colorectal cancer	58	Male	25.2	N/A	N/A	N/A	N/A	N/A	N/A	N/A	N/A	N/A	N/A
Zeller (2014)	Potential of fecal microbiota for early-stage detection of colorectal cancer	Mol Syst Biol	PRJEB6070	SAMEA2467052	Illumina MiSeq	PAIRED	Non-healthy	Colorectal cancer	73	Female	22.4	N/A	N/A	N/A	N/A	N/A	N/A	N/A	N/A	N/A	N/A
Zeller (2014)	Potential of fecal microbiota for early-stage detection of colorectal cancer	Mol Syst Biol	PRJEB6070	SAMEA2467067	Illumina MiSeq	PAIRED	Non-healthy	Colorectal cancer	51	Male	27.7489	N/A	N/A	N/A	N/A	N/A	N/A	N/A	N/A	N/A	N/A
Zeller (2014)	Potential of fecal microbiota for early-stage detection of colorectal cancer	Mol Syst Biol	PRJEB6070	SAMEA2467051	Illumina MiSeq	PAIRED	Non-healthy	Colorectal cancer	66	Male	31.1	N/A	N/A	N/A	N/A	N/A	N/A	N/A	N/A	N/A	N/A
Zeller (2014)	Potential of fecal microbiota for early-stage detection of colorectal cancer	Mol Syst Biol	PRJEB6070	SAMEA2467050	Illumina MiSeq	PAIRED	Non-healthy	Colorectal cancer	79	Female	26.4	N/A	N/A	N/A	N/A	N/A	N/A	N/A	N/A	N/A	N/A
Zeller (2014)	Potential of fecal microbiota for early-stage detection of colorectal cancer	Mol Syst Biol	PRJEB6070	SAMEA2467049	Illumina MiSeq	PAIRED	Non-healthy	Colorectal cancer	34	Male	26.8	N/A	N/A	N/A	N/A	N/A	N/A	N/A	N/A	N/A	N/A
Zeller (2014)	Potential of fecal microbiota for early-stage detection of colorectal cancer	Mol Syst Biol	PRJEB6070	SAMEA2467048	Illumina MiSeq	PAIRED	Non-healthy	Colorectal cancer	67	Male	30.1	N/A	N/A	N/A	N/A	N/A	N/A	N/A	N/A	N/A	N/A
Zeller (2014)	Potential of fecal microbiota for early-stage detection of colorectal cancer	Mol Syst Biol	PRJEB6070	SAMEA2467047	Illumina MiSeq	PAIRED	Non-healthy	Colorectal cancer	70	Male	25.2	N/A	N/A	N/A	N/A	N/A	N/A	N/A	N/A	N/A	N/A
Zeller (2014)	Potential of fecal microbiota for early-stage detection of colorectal cancer	Mol Syst Biol	PRJEB6070	SAMEA2467046	Illumina MiSeq	PAIRED	Non-healthy	Colorectal cancer	77	Female	26.2	N/A	N/A	N/A	N/A	N/A	N/A	N/A	N/A	N/A	N/A
Zeller (2014)	Potential of fecal microbiota for early-stage detection of colorectal cancer	Mol Syst Biol	PRJEB6070	SAMEA2467074	Illumina MiSeq	PAIRED	Non-healthy	Colorectal cancer	68	Male	22.7	N/A	N/A	N/A	N/A	N/A	N/A	N/A	N/A	N/A	N/A
Zeller (2014)	Potential of fecal microbiota for early-stage detection of colorectal cancer	Mol Syst Biol	PRJEB6070	SAMEA2467045	Illumina MiSeq	PAIRED	Non-healthy	Colorectal cancer	53	Female	30.5	N/A	N/A	N/A	N/A	N/A	N/A	N/A	N/A	N/A	N/A
Zeller (2014)	Potential of fecal microbiota for early-stage detection of colorectal cancer	Mol Syst Biol	PRJEB6070	SAMEA2467044	Illumina MiSeq	PAIRED	Non-healthy	Colorectal cancer	55	Male	27.5	N/A	N/A	N/A	N/A	N/A	N/A	N/A	N/A	N/A	N/A
Zeller (2014)	Potential of fecal microbiota for early-stage detection of colorectal cancer	Mol Syst Biol	PRJEB6070	SAMEA2467043	Illumina MiSeq	PAIRED	Non-healthy	Colorectal cancer	72	Male	27.7	N/A	N/A	N/A	N/A	N/A	N/A	N/A	N/A	N/A	N/A
Zeller (2014)	Potential of fecal microbiota for early-stage detection of colorectal cancer	Mol Syst Biol	PRJEB6070	SAMEA2467075	Illumina MiSeq	PAIRED	Non-healthy	Colorectal cancer	43	Female	22.1	N/A	N/A	N/A	N/A	N/A	N/A	N/A	N/A	N/A	N/A
Zeller (2014)	Potential of fecal microbiota for early-stage detection of colorectal cancer	Mol Syst Biol	PRJEB6070	SAMEA2467069	Illumina MiSeq	PAIRED	Non-healthy	Colorectal cancer	51	Male	29.7	N/A	N/A	N/A	N/A	N/A	N/A	N/A	N/A	N/A	N/A
Zeller (2014)	Potential of fecal microbiota for early-stage detection of colorectal cancer	Mol Syst Biol	PRJEB6070	SAMEA2467071	Illumina MiSeq	PAIRED	Non-healthy	Colorectal cancer	49	Female	30.3	N/A	N/A	N/A	N/A	N/A	N/A	N/A	N/A	N/A	N/A
Zeller (2014)	Potential of fecal microbiota for early-stage detection of colorectal cancer	Mol Syst Biol	PRJEB6070	SAMEA2467079	Illumina MiSeq	PAIRED	Non-healthy	Colorectal cancer	90	Male	27.7	N/A	N/A	N/A	N/A	N/A	N/A	N/A	N/A	N/A	N/A
Zeller (2014)	Potential of fecal microbiota for early-stage detection of colorectal cancer	Mol Syst Biol	PRJEB6070	SAMEA2467082	Illumina MiSeq	PAIRED	Non-healthy	Colorectal cancer	34	Male	23.3	N/A	N/A	N/A	N/A	N/A	N/A	N/A	N/A	N/A	N/A
Zeller (2014)	Potential of fecal microbiota for early-stage detection of colorectal cancer	Mol Syst Biol	PRJEB6070	SAMEA2467083	Illumina MiSeq	PAIRED	Non-healthy	Colorectal cancer	30	Male	31.2	N/A	N/A	N/A	N/A	N/A	N/A	N/A	N/A	N/A	N/A
Zeller (2014)	Potential of fecal microbiota for early-stage detection of colorectal cancer	Mol Syst Biol	PRJEB6070	SAMEA2467085	Illumina MiSeq	PAIRED	Non-healthy	Colorectal cancer	34	Male	21.1	N/A	N/A	N/A	N/A	N/A	N/A	N/A	N/A	N/A	N/A
Zeller (2014)	Potential of fecal microbiota for early-stage detection of colorectal cancer	Mol Syst Biol	PRJEB6070	SAMEA2467084	Illumina MiSeq	PAIRED	Non-healthy	Colorectal cancer	37	Male	25	N/A	N/A	N/A	N/A	N/A	N/A	N/A	N/A	N/A	N/A
Zeller (2014)	Potential of fecal microbiota for early-stage detection of colorectal cancer	Mol Syst Biol	PRJEB6070	SAMEA2467081	Illumina MiSeq	PAIRED	Non-healthy	Colorectal cancer	49	Male	26.3	N/A	N/A	N/A	N/A	N/A	N/A	N/A	N/A	N/A	N/A
Feng (2015)	Gut microbiome development along the colorectal adenoma–carcinoma sequence	Nature Communications	PRJEB7774	SAMEA3136769	Illumina HiSeq 2000	PAIRED	Non-healthy	Colorectal cancer	73	Male	17.9902	5.2	1	1.8	N/A	1.3	No	Yes	N/A	Yes	N/A
Feng (2015)	Gut microbiome development along the colorectal adenoma–carcinoma sequence	Nature Communications	PRJEB7774	SAMEA3136751	Illumina HiSeq 2000	PAIRED	Non-healthy	Colorectal cancer	65	Male	28.0277	5.1	1.1	1.8	N/A	1.9	Yes	Yes	N/A	Yes	N/A
Feng (2015)	Gut microbiome development along the colorectal adenoma–carcinoma sequence	Nature Communications	PRJEB7774	SAMEA3136738	Illumina HiSeq 2000	PAIRED	Non-healthy	Colorectal cancer	65	Female	23.3067	5.6	0.9	5.2	N/A	1.9	Yes	No	N/A	Yes	N/A
Feng (2015)	Gut microbiome development along the colorectal adenoma–carcinoma sequence	Nature Communications	PRJEB7774	SAMEA3136747	Illumina HiSeq 2000	PAIRED	Non-healthy	Colorectal cancer	67	Male	29.4029	5.4	1	2.5	N/A	1.5	Yes	No	N/A	Yes	N/A
Feng (2015)	Gut microbiome development along the colorectal adenoma–carcinoma sequence	Nature Communications	PRJEB7774	SAMEA3136743	Illumina HiSeq 2000	PAIRED	Non-healthy	Colorectal cancer	82	Male	30.4705	6.4	3.8	4	N/A	1.2	Yes	Yes	N/A	Yes	N/A
Feng (2015)	Gut microbiome development along the colorectal adenoma–carcinoma sequence	Nature Communications	PRJEB7774	SAMEA3136754	Illumina HiSeq 2000	PAIRED	Non-healthy	Colorectal cancer	84	Male	27.2817	9.6	2.6	4.5	N/A	1.1	Yes	Yes	N/A	No	N/A
Feng (2015)	Gut microbiome development along the colorectal adenoma–carcinoma sequence	Nature Communications	PRJEB7774	SAMEA3136765	Illumina HiSeq 2000	PAIRED	Non-healthy	Colorectal cancer	86	Female	20.5049	6.4	1	2.3	N/A	1.1	Yes	Yes	N/A	Yes	N/A
Feng (2015)	Gut microbiome development along the colorectal adenoma–carcinoma sequence	Nature Communications	PRJEB7774	SAMEA3136724	Illumina HiSeq 2000	PAIRED	Non-healthy	Colorectal cancer	84	Female	31.2175	N/A	1.8	3.3	N/A	1.4	Yes	No	N/A	Yes	N/A
Feng (2015)	Gut microbiome development along the colorectal adenoma–carcinoma sequence	Nature Communications	PRJEB7774	SAMEA3136755	Illumina HiSeq 2000	PAIRED	Non-healthy	Colorectal cancer	60	Male	26.6436	5	0.8	3.3	N/A	1.8	Yes	No	N/A	Yes	N/A
Feng (2015)	Gut microbiome development along the colorectal adenoma–carcinoma sequence	Nature Communications	PRJEB7774	SAMEA3136766	Illumina HiSeq 2000	PAIRED	Non-healthy	Colorectal cancer	68	Male	32.2494	5.7	1.8	4.1	N/A	1.5	Yes	No	N/A	Yes	N/A
Feng (2015)	Gut microbiome development along the colorectal adenoma–carcinoma sequence	Nature Communications	PRJEB7774	SAMEA3136728	Illumina HiSeq 2000	PAIRED	Non-healthy	Colorectal cancer	84	Female	27.7671	5.2	1.8	3.3	N/A	1.5	No	No	N/A	Yes	N/A
Feng (2015)	Gut microbiome development along the colorectal adenoma–carcinoma sequence	Nature Communications	PRJEB7774	SAMEA3136756	Illumina HiSeq 2000	PAIRED	Non-healthy	Colorectal cancer	74	Male	26.3656	5.7	2.3	4.8	N/A	1.3	Yes	Yes	N/A	Yes	N/A
Feng (2015)	Gut microbiome development along the colorectal adenoma–carcinoma sequence	Nature Communications	PRJEB7774	SAMEA3136753	Illumina HiSeq 2000	PAIRED	Non-healthy	Colorectal cancer	54	Male	27.3356	5.6	1.9	4.5	N/A	1.2	Yes	Yes	N/A	Yes	N/A
Feng (2015)	Gut microbiome development along the colorectal adenoma–carcinoma sequence	Nature Communications	PRJEB7774	SAMEA3136737	Illumina HiSeq 2000	PAIRED	Non-healthy	Colorectal cancer	55	Female	23.3355	5.1	1.2	2.6	N/A	1.6	No	No	N/A	No	N/A
Feng (2015)	Gut microbiome development along the colorectal adenoma–carcinoma sequence	Nature Communications	PRJEB7774	SAMEA3136726	Illumina HiSeq 2000	PAIRED	Non-healthy	Colorectal cancer	73	Female	29.7521	6	0.9	3.6	N/A	1.5	Yes	Yes	N/A	Yes	N/A
Feng (2015)	Gut microbiome development along the colorectal adenoma–carcinoma sequence	Nature Communications	PRJEB7774	SAMEA3136734	Illumina HiSeq 2000	PAIRED	Non-healthy	Colorectal cancer	64	Female	24.0882	5.8	0.7	2.7	N/A	1.8	No	No	N/A	No	N/A
Feng (2015)	Gut microbiome development along the colorectal adenoma–carcinoma sequence	Nature Communications	PRJEB7774	SAMEA3136758	Illumina HiSeq 2000	PAIRED	Non-healthy	Colorectal cancer	63	Male	25.8806	5.9	2	3.3	N/A	1.4	Yes	Yes	N/A	Yes	N/A
Feng (2015)	Gut microbiome development along the colorectal adenoma–carcinoma sequence	Nature Communications	PRJEB7774	SAMEA3136750	Illumina HiSeq 2000	PAIRED	Non-healthy	Colorectal cancer	72	Male	28.4082	6.9	1.8	4.4	N/A	2	Yes	No	N/A	Yes	N/A
Feng (2015)	Gut microbiome development along the colorectal adenoma–carcinoma sequence	Nature Communications	PRJEB7774	SAMEA3136742	Illumina HiSeq 2000	PAIRED	Non-healthy	Colorectal cancer	46	Male	30.8642	5.6	1.5	2.3	N/A	1.4	Yes	Yes	N/A	Yes	N/A
Feng (2015)	Gut microbiome development along the colorectal adenoma–carcinoma sequence	Nature Communications	PRJEB7774	SAMEA3136760	Illumina HiSeq 2000	PAIRED	Non-healthy	Colorectal cancer	73	Male	24.8163	6.1	0.6	2.6	N/A	1.7	No	No	N/A	Yes	N/A
Feng (2015)	Gut microbiome development along the colorectal adenoma–carcinoma sequence	Nature Communications	PRJEB7774	SAMEA3136727	Illumina HiSeq 2000	PAIRED	Non-healthy	Colorectal cancer	74	Female	29.1749	7.1	1	3.3	N/A	1.3	No	No	N/A	No	N/A
Feng (2015)	Gut microbiome development along the colorectal adenoma–carcinoma sequence	Nature Communications	PRJEB7774	SAMEA3136752	Illumina HiSeq 2000	PAIRED	Non-healthy	Colorectal cancer	58	Male	27.7575	6.2	1.6	4.6	N/A	1.8	Yes	No	N/A	Yes	N/A
Feng (2015)	Gut microbiome development along the colorectal adenoma–carcinoma sequence	Nature Communications	PRJEB7774	SAMEA3136740	Illumina HiSeq 2000	PAIRED	Non-healthy	Colorectal cancer	56	Female	20.0692	5.1	2	2.5	N/A	1.7	No	Yes	N/A	Yes	N/A
Feng (2015)	Gut microbiome development along the colorectal adenoma–carcinoma sequence	Nature Communications	PRJEB7774	SAMEA3136731	Illumina HiSeq 2000	PAIRED	Non-healthy	Colorectal cancer	72	Female	26.6728	5.4	0.9	2	N/A	1.8	No	Yes	N/A	Yes	N/A
Feng (2015)	Gut microbiome development along the colorectal adenoma–carcinoma sequence	Nature Communications	PRJEB7774	SAMEA3136729	Illumina HiSeq 2000	PAIRED	Non-healthy	Colorectal cancer	52	Female	27.1416	6.3	1.5	4.7	N/A	1.8	Yes	No	N/A	Yes	N/A
Feng (2015)	Gut microbiome development along the colorectal adenoma–carcinoma sequence	Nature Communications	PRJEB7774	SAMEA3136767	Illumina HiSeq 2000	PAIRED	Non-healthy	Colorectal cancer	71	Male	29.737	5.3	1.1	5	N/A	1.7	Yes	Yes	N/A	Yes	N/A
Feng (2015)	Gut microbiome development along the colorectal adenoma–carcinoma sequence	Nature Communications	PRJEB7774	SAMEA3136761	Illumina HiSeq 2000	PAIRED	Non-healthy	Colorectal cancer	74	Male	24.3375	7.1	0.6	3	N/A	1.2	Yes	No	N/A	Yes	N/A
Feng (2015)	Gut microbiome development along the colorectal adenoma–carcinoma sequence	Nature Communications	PRJEB7774	SAMEA3136725	Illumina HiSeq 2000	PAIRED	Non-healthy	Colorectal cancer	60	Female	30.0781	4.6	1.8	4.7	N/A	1.6	Yes	Yes	N/A	Yes	N/A
Feng (2015)	Gut microbiome development along the colorectal adenoma–carcinoma sequence	Nature Communications	PRJEB7774	SAMEA3136763	Illumina HiSeq 2000	PAIRED	Non-healthy	Colorectal cancer	43	Male	22.68	5.1	1.7	5.7	N/A	1.1	No	Yes	N/A	No	N/A
Feng (2015)	Gut microbiome development along the colorectal adenoma–carcinoma sequence	Nature Communications	PRJEB7774	SAMEA3136732	Illumina HiSeq 2000	PAIRED	Non-healthy	Colorectal cancer	47	Female	25.7812	4.7	0.4	2.9	N/A	1.8	Yes	Yes	N/A	Yes	N/A
Feng (2015)	Gut microbiome development along the colorectal adenoma–carcinoma sequence	Nature Communications	PRJEB7774	SAMEA3136746	Illumina HiSeq 2000	PAIRED	Non-healthy	Colorectal cancer	77	Male	29.4118	5.8	0.9	4.1	N/A	1.4	No	No	N/A	No	N/A
Feng (2015)	Gut microbiome development along the colorectal adenoma–carcinoma sequence	Nature Communications	PRJEB7774	SAMEA3136733	Illumina HiSeq 2000	PAIRED	Non-healthy	Colorectal cancer	72	Female	24.2188	4.4	1.3	4	N/A	1.5	Yes	No	N/A	Yes	N/A
Feng (2015)	Gut microbiome development along the colorectal adenoma–carcinoma sequence	Nature Communications	PRJEB7774	SAMEA3136757	Illumina HiSeq 2000	PAIRED	Non-healthy	Colorectal cancer	79	Male	26.2976	6.7	1.2	3.4	N/A	1.1	Yes	No	N/A	Yes	N/A
Feng (2015)	Gut microbiome development along the colorectal adenoma–carcinoma sequence	Nature Communications	PRJEB7774	SAMEA3136749	Illumina HiSeq 2000	PAIRED	Non-healthy	Colorectal cancer	64	Male	29.0688	5.8	1.5	4.3	N/A	1.4	Yes	No	N/A	Yes	N/A
Feng (2015)	Gut microbiome development along the colorectal adenoma–carcinoma sequence	Nature Communications	PRJEB7774	SAMEA3136730	Illumina HiSeq 2000	PAIRED	Non-healthy	Colorectal cancer	72	Female	27.1203	5.7	1.2	3.4	N/A	1.4	Yes	No	N/A	Yes	N/A
Feng (2015)	Gut microbiome development along the colorectal adenoma–carcinoma sequence	Nature Communications	PRJEB7774	SAMEA3136744	Illumina HiSeq 2000	PAIRED	Non-healthy	Colorectal cancer	69	Male	29.9383	6.1	1.4	2.9	N/A	1	Yes	No	N/A	Yes	N/A
Feng (2015)	Gut microbiome development along the colorectal adenoma–carcinoma sequence	Nature Communications	PRJEB7774	SAMEA3136764	Illumina HiSeq 2000	PAIRED	Non-healthy	Colorectal cancer	66	Male	22.5981	5.8	1.6	4.4	N/A	1.6	Yes	Yes	N/A	No	N/A
Feng (2015)	Gut microbiome development along the colorectal adenoma–carcinoma sequence	Nature Communications	PRJEB7774	SAMEA3136735	Illumina HiSeq 2000	PAIRED	Non-healthy	Colorectal cancer	72	Female	23.8281	5.4	2.6	4.7	N/A	1.4	No	No	N/A	Yes	N/A
Feng (2015)	Gut microbiome development along the colorectal adenoma–carcinoma sequence	Nature Communications	PRJEB7774	SAMEA3136745	Illumina HiSeq 2000	PAIRED	Non-healthy	Colorectal cancer	65	Male	29.7406	3.9	1.2	3.9	N/A	1	Yes	Yes	N/A	Yes	N/A
Feng (2015)	Gut microbiome development along the colorectal adenoma–carcinoma sequence	Nature Communications	PRJEB7774	SAMEA3136741	Illumina HiSeq 2000	PAIRED	Non-healthy	Colorectal cancer	63	Male	33.564	6.4	1.7	2.7	N/A	2	Yes	Yes	N/A	Yes	N/A
Feng (2015)	Gut microbiome development along the colorectal adenoma–carcinoma sequence	Nature Communications	PRJEB7774	SAMEA3136739	Illumina HiSeq 2000	PAIRED	Non-healthy	Colorectal cancer	45	Female	22.1453	5.2	0.6	3.9	N/A	1.7	Yes	No	N/A	Yes	N/A
Feng (2015)	Gut microbiome development along the colorectal adenoma–carcinoma sequence	Nature Communications	PRJEB7774	SAMEA3136762	Illumina HiSeq 2000	PAIRED	Non-healthy	Colorectal cancer	72	Male	24.3375	4.9	0.6	1.9	N/A	1.2	Yes	Yes	N/A	Yes	N/A
Feng (2015)	Gut microbiome development along the colorectal adenoma–carcinoma sequence	Nature Communications	PRJEB7774	SAMEA3136736	Illumina HiSeq 2000	PAIRED	Non-healthy	Colorectal cancer	77	Female	23.4952	5.5	0.8	4	N/A	2.3	Yes	No	N/A	Yes	N/A
Vogtmann (2016)	Colorectal Cancer and the Human Gut Microbiome: Reproducibility with Whole-Genome Shotgun Sequencing	PLoS One	PRJEB12449	SAMEA3879501	Illumina HiSeq 2000	PAIRED	Non-healthy	Colorectal cancer	67	Female	30.0354	N/A	N/A	N/A	N/A	N/A	N/A	N/A	N/A	N/A	N/A
Vogtmann (2016)	Colorectal Cancer and the Human Gut Microbiome: Reproducibility with Whole-Genome Shotgun Sequencing	PLoS One	PRJEB12449	SAMEA3879505	Illumina HiSeq 2000	PAIRED	Non-healthy	Colorectal cancer	31	Male	19.6419	N/A	N/A	N/A	N/A	N/A	N/A	N/A	N/A	N/A	N/A
Vogtmann (2016)	Colorectal Cancer and the Human Gut Microbiome: Reproducibility with Whole-Genome Shotgun Sequencing	PLoS One	PRJEB12449	SAMEA3879506	Illumina HiSeq 2000	PAIRED	Non-healthy	Colorectal cancer	65	Male	25.1022	N/A	N/A	N/A	N/A	N/A	N/A	N/A	N/A	N/A	N/A
Vogtmann (2016)	Colorectal Cancer and the Human Gut Microbiome: Reproducibility with Whole-Genome Shotgun Sequencing	PLoS One	PRJEB12449	SAMEA3879508	Illumina HiSeq 2000	PAIRED	Non-healthy	Colorectal cancer	89	Female	22.6717	N/A	N/A	N/A	N/A	N/A	N/A	N/A	N/A	N/A	N/A
Vogtmann (2016)	Colorectal Cancer and the Human Gut Microbiome: Reproducibility with Whole-Genome Shotgun Sequencing	PLoS One	PRJEB12449	SAMEA3879510	Illumina HiSeq 2000	PAIRED	Non-healthy	Colorectal cancer	69	Female	20.7988	N/A	N/A	N/A	N/A	N/A	N/A	N/A	N/A	N/A	N/A
Vogtmann (2016)	Colorectal Cancer and the Human Gut Microbiome: Reproducibility with Whole-Genome Shotgun Sequencing	PLoS One	PRJEB12449	SAMEA3879516	Illumina HiSeq 2000	PAIRED	Non-healthy	Colorectal cancer	69	Female	27.7597	N/A	N/A	N/A	N/A	N/A	N/A	N/A	N/A	N/A	N/A
Vogtmann (2016)	Colorectal Cancer and the Human Gut Microbiome: Reproducibility with Whole-Genome Shotgun Sequencing	PLoS One	PRJEB12449	SAMEA3879517	Illumina HiSeq 2000	PAIRED	Non-healthy	Colorectal cancer	42	Male	22.0341	N/A	N/A	N/A	N/A	N/A	N/A	N/A	N/A	N/A	N/A
Vogtmann (2016)	Colorectal Cancer and the Human Gut Microbiome: Reproducibility with Whole-Genome Shotgun Sequencing	PLoS One	PRJEB12449	SAMEA3879518	Illumina HiSeq 2000	PAIRED	Non-healthy	Colorectal cancer	74	Male	N/A	N/A	N/A	N/A	N/A	N/A	N/A	N/A	N/A	N/A	N/A
Vogtmann (2016)	Colorectal Cancer and the Human Gut Microbiome: Reproducibility with Whole-Genome Shotgun Sequencing	PLoS One	PRJEB12449	SAMEA3879519	Illumina HiSeq 2000	PAIRED	Non-healthy	Colorectal cancer	85	Male	22.8049	N/A	N/A	N/A	N/A	N/A	N/A	N/A	N/A	N/A	N/A
Vogtmann (2016)	Colorectal Cancer and the Human Gut Microbiome: Reproducibility with Whole-Genome Shotgun Sequencing	PLoS One	PRJEB12449	SAMEA3879520	Illumina HiSeq 2000	PAIRED	Non-healthy	Colorectal cancer	74	Male	23.5961	N/A	N/A	N/A	N/A	N/A	N/A	N/A	N/A	N/A	N/A
Vogtmann (2016)	Colorectal Cancer and the Human Gut Microbiome: Reproducibility with Whole-Genome Shotgun Sequencing	PLoS One	PRJEB12449	SAMEA3879521	Illumina HiSeq 2000	PAIRED	Non-healthy	Colorectal cancer	70	Male	25.0568	N/A	N/A	N/A	N/A	N/A	N/A	N/A	N/A	N/A	N/A
Vogtmann (2016)	Colorectal Cancer and the Human Gut Microbiome: Reproducibility with Whole-Genome Shotgun Sequencing	PLoS One	PRJEB12449	SAMEA3879527	Illumina HiSeq 2000	PAIRED	Non-healthy	Colorectal cancer	44	Male	23.3649	N/A	N/A	N/A	N/A	N/A	N/A	N/A	N/A	N/A	N/A
Vogtmann (2016)	Colorectal Cancer and the Human Gut Microbiome: Reproducibility with Whole-Genome Shotgun Sequencing	PLoS One	PRJEB12449	SAMEA3879529	Illumina HiSeq 2000	PAIRED	Non-healthy	Colorectal cancer	65	Male	21.1417	N/A	N/A	N/A	N/A	N/A	N/A	N/A	N/A	N/A	N/A
Vogtmann (2016)	Colorectal Cancer and the Human Gut Microbiome: Reproducibility with Whole-Genome Shotgun Sequencing	PLoS One	PRJEB12449	SAMEA3879531	Illumina HiSeq 2000	PAIRED	Non-healthy	Colorectal cancer	59	Female	20.3691	N/A	N/A	N/A	N/A	N/A	N/A	N/A	N/A	N/A	N/A
Vogtmann (2016)	Colorectal Cancer and the Human Gut Microbiome: Reproducibility with Whole-Genome Shotgun Sequencing	PLoS One	PRJEB12449	SAMEA3879533	Illumina HiSeq 2000	PAIRED	Non-healthy	Colorectal cancer	83	Female	16.8252	N/A	N/A	N/A	N/A	N/A	N/A	N/A	N/A	N/A	N/A
Vogtmann (2016)	Colorectal Cancer and the Human Gut Microbiome: Reproducibility with Whole-Genome Shotgun Sequencing	PLoS One	PRJEB12449	SAMEA3879534	Illumina HiSeq 2000	PAIRED	Non-healthy	Colorectal cancer	55	Male	29.6464	N/A	N/A	N/A	N/A	N/A	N/A	N/A	N/A	N/A	N/A
Vogtmann (2016)	Colorectal Cancer and the Human Gut Microbiome: Reproducibility with Whole-Genome Shotgun Sequencing	PLoS One	PRJEB12449	SAMEA3879535	Illumina HiSeq 2000	PAIRED	Non-healthy	Colorectal cancer	71	Female	N/A	N/A	N/A	N/A	N/A	N/A	N/A	N/A	N/A	N/A	N/A
Vogtmann (2016)	Colorectal Cancer and the Human Gut Microbiome: Reproducibility with Whole-Genome Shotgun Sequencing	PLoS One	PRJEB12449	SAMEA3879537	Illumina HiSeq 2000	PAIRED	Non-healthy	Colorectal cancer	31	Male	19.5756	N/A	N/A	N/A	N/A	N/A	N/A	N/A	N/A	N/A	N/A
Vogtmann (2016)	Colorectal Cancer and the Human Gut Microbiome: Reproducibility with Whole-Genome Shotgun Sequencing	PLoS One	PRJEB12449	SAMEA3879539	Illumina HiSeq 2000	PAIRED	Non-healthy	Colorectal cancer	53	Male	25.3941	N/A	N/A	N/A	N/A	N/A	N/A	N/A	N/A	N/A	N/A
Vogtmann (2016)	Colorectal Cancer and the Human Gut Microbiome: Reproducibility with Whole-Genome Shotgun Sequencing	PLoS One	PRJEB12449	SAMEA3879540	Illumina HiSeq 2000	PAIRED	Non-healthy	Colorectal cancer	40	Male	23.7344	N/A	N/A	N/A	N/A	N/A	N/A	N/A	N/A	N/A	N/A
Vogtmann (2016)	Colorectal Cancer and the Human Gut Microbiome: Reproducibility with Whole-Genome Shotgun Sequencing	PLoS One	PRJEB12449	SAMEA3879544	Illumina HiSeq 2000	PAIRED	Non-healthy	Colorectal cancer	73	Male	25.8219	N/A	N/A	N/A	N/A	N/A	N/A	N/A	N/A	N/A	N/A
Vogtmann (2016)	Colorectal Cancer and the Human Gut Microbiome: Reproducibility with Whole-Genome Shotgun Sequencing	PLoS One	PRJEB12449	SAMEA3879545	Illumina HiSeq 2000	PAIRED	Non-healthy	Colorectal cancer	58	Male	21.1071	N/A	N/A	N/A	N/A	N/A	N/A	N/A	N/A	N/A	N/A
Vogtmann (2016)	Colorectal Cancer and the Human Gut Microbiome: Reproducibility with Whole-Genome Shotgun Sequencing	PLoS One	PRJEB12449	SAMEA3879548	Illumina HiSeq 2000	PAIRED	Non-healthy	Colorectal cancer	65	Male	32.075	N/A	N/A	N/A	N/A	N/A	N/A	N/A	N/A	N/A	N/A
Vogtmann (2016)	Colorectal Cancer and the Human Gut Microbiome: Reproducibility with Whole-Genome Shotgun Sequencing	PLoS One	PRJEB12449	SAMEA3879555	Illumina HiSeq 2000	PAIRED	Non-healthy	Colorectal cancer	55	Female	31.6142	N/A	N/A	N/A	N/A	N/A	N/A	N/A	N/A	N/A	N/A
Vogtmann (2016)	Colorectal Cancer and the Human Gut Microbiome: Reproducibility with Whole-Genome Shotgun Sequencing	PLoS One	PRJEB12449	SAMEA3879556	Illumina HiSeq 2000	PAIRED	Non-healthy	Colorectal cancer	43	Male	32.0256	N/A	N/A	N/A	N/A	N/A	N/A	N/A	N/A	N/A	N/A
Vogtmann (2016)	Colorectal Cancer and the Human Gut Microbiome: Reproducibility with Whole-Genome Shotgun Sequencing	PLoS One	PRJEB12449	SAMEA3879557	Illumina HiSeq 2000	PAIRED	Non-healthy	Colorectal cancer	63	Female	25.6828	N/A	N/A	N/A	N/A	N/A	N/A	N/A	N/A	N/A	N/A
Vogtmann (2016)	Colorectal Cancer and the Human Gut Microbiome: Reproducibility with Whole-Genome Shotgun Sequencing	PLoS One	PRJEB12449	SAMEA3879558	Illumina HiSeq 2000	PAIRED	Non-healthy	Colorectal cancer	40	Male	17.4321	N/A	N/A	N/A	N/A	N/A	N/A	N/A	N/A	N/A	N/A
Vogtmann (2016)	Colorectal Cancer and the Human Gut Microbiome: Reproducibility with Whole-Genome Shotgun Sequencing	PLoS One	PRJEB12449	SAMEA3879559	Illumina HiSeq 2000	PAIRED	Non-healthy	Colorectal cancer	66	Male	21.5676	N/A	N/A	N/A	N/A	N/A	N/A	N/A	N/A	N/A	N/A
Vogtmann (2016)	Colorectal Cancer and the Human Gut Microbiome: Reproducibility with Whole-Genome Shotgun Sequencing	PLoS One	PRJEB12449	SAMEA3879560	Illumina HiSeq 2000	PAIRED	Non-healthy	Colorectal cancer	53	Male	27.8913	N/A	N/A	N/A	N/A	N/A	N/A	N/A	N/A	N/A	N/A
Vogtmann (2016)	Colorectal Cancer and the Human Gut Microbiome: Reproducibility with Whole-Genome Shotgun Sequencing	PLoS One	PRJEB12449	SAMEA3879562	Illumina HiSeq 2000	PAIRED	Non-healthy	Colorectal cancer	67	Male	33.1972	N/A	N/A	N/A	N/A	N/A	N/A	N/A	N/A	N/A	N/A
Vogtmann (2016)	Colorectal Cancer and the Human Gut Microbiome: Reproducibility with Whole-Genome Shotgun Sequencing	PLoS One	PRJEB12449	SAMEA3879563	Illumina HiSeq 2000	PAIRED	Non-healthy	Colorectal cancer	54	Female	23.4908	N/A	N/A	N/A	N/A	N/A	N/A	N/A	N/A	N/A	N/A
Vogtmann (2016)	Colorectal Cancer and the Human Gut Microbiome: Reproducibility with Whole-Genome Shotgun Sequencing	PLoS One	PRJEB12449	SAMEA3879567	Illumina HiSeq 2000	PAIRED	Non-healthy	Colorectal cancer	63	Male	21.2547	N/A	N/A	N/A	N/A	N/A	N/A	N/A	N/A	N/A	N/A
Vogtmann (2016)	Colorectal Cancer and the Human Gut Microbiome: Reproducibility with Whole-Genome Shotgun Sequencing	PLoS One	PRJEB12449	SAMEA3879569	Illumina HiSeq 2000	PAIRED	Non-healthy	Colorectal cancer	37	Male	22.5009	N/A	N/A	N/A	N/A	N/A	N/A	N/A	N/A	N/A	N/A
Vogtmann (2016)	Colorectal Cancer and the Human Gut Microbiome: Reproducibility with Whole-Genome Shotgun Sequencing	PLoS One	PRJEB12449	SAMEA3879572	Illumina HiSeq 2000	PAIRED	Non-healthy	Colorectal cancer	78	Male	22.5511	N/A	N/A	N/A	N/A	N/A	N/A	N/A	N/A	N/A	N/A
Vogtmann (2016)	Colorectal Cancer and the Human Gut Microbiome: Reproducibility with Whole-Genome Shotgun Sequencing	PLoS One	PRJEB12449	SAMEA3879573	Illumina HiSeq 2000	PAIRED	Non-healthy	Colorectal cancer	71	Male	24.7436	N/A	N/A	N/A	N/A	N/A	N/A	N/A	N/A	N/A	N/A
Vogtmann (2016)	Colorectal Cancer and the Human Gut Microbiome: Reproducibility with Whole-Genome Shotgun Sequencing	PLoS One	PRJEB12449	SAMEA3879575	Illumina HiSeq 2000	PAIRED	Non-healthy	Colorectal cancer	54	Female	24.0212	N/A	N/A	N/A	N/A	N/A	N/A	N/A	N/A	N/A	N/A
Vogtmann (2016)	Colorectal Cancer and the Human Gut Microbiome: Reproducibility with Whole-Genome Shotgun Sequencing	PLoS One	PRJEB12449	SAMEA3879578	Illumina HiSeq 2000	PAIRED	Non-healthy	Colorectal cancer	84	Female	N/A	N/A	N/A	N/A	N/A	N/A	N/A	N/A	N/A	N/A	N/A
Vogtmann (2016)	Colorectal Cancer and the Human Gut Microbiome: Reproducibility with Whole-Genome Shotgun Sequencing	PLoS One	PRJEB12449	SAMEA3879581	Illumina HiSeq 2000	PAIRED	Non-healthy	Colorectal cancer	66	Male	22.313	N/A	N/A	N/A	N/A	N/A	N/A	N/A	N/A	N/A	N/A
Vogtmann (2016)	Colorectal Cancer and the Human Gut Microbiome: Reproducibility with Whole-Genome Shotgun Sequencing	PLoS One	PRJEB12449	SAMEA3879582	Illumina HiSeq 2000	PAIRED	Non-healthy	Colorectal cancer	66	Female	31.4704	N/A	N/A	N/A	N/A	N/A	N/A	N/A	N/A	N/A	N/A
Vogtmann (2016)	Colorectal Cancer and the Human Gut Microbiome: Reproducibility with Whole-Genome Shotgun Sequencing	PLoS One	PRJEB12449	SAMEA3879583	Illumina HiSeq 2000	PAIRED	Non-healthy	Colorectal cancer	65	Male	24.3253	N/A	N/A	N/A	N/A	N/A	N/A	N/A	N/A	N/A	N/A
Vogtmann (2016)	Colorectal Cancer and the Human Gut Microbiome: Reproducibility with Whole-Genome Shotgun Sequencing	PLoS One	PRJEB12449	SAMEA3879586	Illumina HiSeq 2000	PAIRED	Non-healthy	Colorectal cancer	72	Female	27.7981	N/A	N/A	N/A	N/A	N/A	N/A	N/A	N/A	N/A	N/A
Vogtmann (2016)	Colorectal Cancer and the Human Gut Microbiome: Reproducibility with Whole-Genome Shotgun Sequencing	PLoS One	PRJEB12449	SAMEA3879594	Illumina HiSeq 2000	PAIRED	Non-healthy	Colorectal cancer	51	Male	25.8219	N/A	N/A	N/A	N/A	N/A	N/A	N/A	N/A	N/A	N/A
Vogtmann (2016)	Colorectal Cancer and the Human Gut Microbiome: Reproducibility with Whole-Genome Shotgun Sequencing	PLoS One	PRJEB12449	SAMEA3879596	Illumina HiSeq 2000	PAIRED	Non-healthy	Colorectal cancer	54	Male	18.5595	N/A	N/A	N/A	N/A	N/A	N/A	N/A	N/A	N/A	N/A
Vogtmann (2016)	Colorectal Cancer and the Human Gut Microbiome: Reproducibility with Whole-Genome Shotgun Sequencing	PLoS One	PRJEB12449	SAMEA3879597	Illumina HiSeq 2000	PAIRED	Non-healthy	Colorectal cancer	57	Male	26.3839	N/A	N/A	N/A	N/A	N/A	N/A	N/A	N/A	N/A	N/A
Vogtmann (2016)	Colorectal Cancer and the Human Gut Microbiome: Reproducibility with Whole-Genome Shotgun Sequencing	PLoS One	PRJEB12449	SAMEA3879599	Illumina HiSeq 2000	PAIRED	Non-healthy	Colorectal cancer	65	Male	31.3777	N/A	N/A	N/A	N/A	N/A	N/A	N/A	N/A	N/A	N/A
Vogtmann (2016)	Colorectal Cancer and the Human Gut Microbiome: Reproducibility with Whole-Genome Shotgun Sequencing	PLoS One	PRJEB12449	SAMEA3879601	Illumina HiSeq 2000	PAIRED	Non-healthy	Colorectal cancer	56	Male	25.8219	N/A	N/A	N/A	N/A	N/A	N/A	N/A	N/A	N/A	N/A
Vogtmann (2016)	Colorectal Cancer and the Human Gut Microbiome: Reproducibility with Whole-Genome Shotgun Sequencing	PLoS One	PRJEB12449	SAMEA3879602	Illumina HiSeq 2000	PAIRED	Non-healthy	Colorectal cancer	71	Male	22.5917	N/A	N/A	N/A	N/A	N/A	N/A	N/A	N/A	N/A	N/A
Vogtmann (2016)	Colorectal Cancer and the Human Gut Microbiome: Reproducibility with Whole-Genome Shotgun Sequencing	PLoS One	PRJEB12449	SAMEA3879604	Illumina HiSeq 2000	PAIRED	Non-healthy	Colorectal cancer	64	Female	35.6992	N/A	N/A	N/A	N/A	N/A	N/A	N/A	N/A	N/A	N/A
Vogtmann (2016)	Colorectal Cancer and the Human Gut Microbiome: Reproducibility with Whole-Genome Shotgun Sequencing	PLoS One	PRJEB12449	SAMEA3879609	Illumina HiSeq 2000	PAIRED	Non-healthy	Colorectal cancer	84	Male	23.4776	N/A	N/A	N/A	N/A	N/A	N/A	N/A	N/A	N/A	N/A
Yu (2015)	Metagenomic analysis of faecal microbiome as a tool towards targeted non-invasive biomarkers for colorectal cancer	Gut	PRJEB10878	SAMEA3541469	Illumina HiSeq 2000	PAIRED	Non-healthy	Colorectal cancer	Adult	N/A	N/A	N/A	N/A	N/A	N/A	N/A	N/A	N/A	N/A	N/A	N/A
Yu (2015)	Metagenomic analysis of faecal microbiome as a tool towards targeted non-invasive biomarkers for colorectal cancer	Gut	PRJEB10878	SAMEA3541470	Illumina HiSeq 2000	PAIRED	Non-healthy	Colorectal cancer	Adult	N/A	N/A	N/A	N/A	N/A	N/A	N/A	N/A	N/A	N/A	N/A	N/A
Yu (2015)	Metagenomic analysis of faecal microbiome as a tool towards targeted non-invasive biomarkers for colorectal cancer	Gut	PRJEB10878	SAMEA3541471	Illumina HiSeq 2000	PAIRED	Non-healthy	Colorectal cancer	Adult	N/A	N/A	N/A	N/A	N/A	N/A	N/A	N/A	N/A	N/A	N/A	N/A
Yu (2015)	Metagenomic analysis of faecal microbiome as a tool towards targeted non-invasive biomarkers for colorectal cancer	Gut	PRJEB10878	SAMEA3541472	Illumina HiSeq 2000	PAIRED	Non-healthy	Colorectal cancer	Adult	N/A	N/A	N/A	N/A	N/A	N/A	N/A	N/A	N/A	N/A	N/A	N/A
Yu (2015)	Metagenomic analysis of faecal microbiome as a tool towards targeted non-invasive biomarkers for colorectal cancer	Gut	PRJEB10878	SAMEA3541473	Illumina HiSeq 2000	PAIRED	Non-healthy	Colorectal cancer	Adult	N/A	N/A	N/A	N/A	N/A	N/A	N/A	N/A	N/A	N/A	N/A	N/A
Yu (2015)	Metagenomic analysis of faecal microbiome as a tool towards targeted non-invasive biomarkers for colorectal cancer	Gut	PRJEB10878	SAMEA3541475	Illumina HiSeq 2000	PAIRED	Non-healthy	Colorectal cancer	Adult	N/A	N/A	N/A	N/A	N/A	N/A	N/A	N/A	N/A	N/A	N/A	N/A
Yu (2015)	Metagenomic analysis of faecal microbiome as a tool towards targeted non-invasive biomarkers for colorectal cancer	Gut	PRJEB10878	SAMEA3541476	Illumina HiSeq 2000	PAIRED	Non-healthy	Colorectal cancer	Adult	N/A	N/A	N/A	N/A	N/A	N/A	N/A	N/A	N/A	N/A	N/A	N/A
Yu (2015)	Metagenomic analysis of faecal microbiome as a tool towards targeted non-invasive biomarkers for colorectal cancer	Gut	PRJEB10878	SAMEA3541478	Illumina HiSeq 2000	PAIRED	Non-healthy	Colorectal cancer	Adult	N/A	N/A	N/A	N/A	N/A	N/A	N/A	N/A	N/A	N/A	N/A	N/A
Yu (2015)	Metagenomic analysis of faecal microbiome as a tool towards targeted non-invasive biomarkers for colorectal cancer	Gut	PRJEB10878	SAMEA3541480	Illumina HiSeq 2000	PAIRED	Non-healthy	Colorectal cancer	Adult	N/A	N/A	N/A	N/A	N/A	N/A	N/A	N/A	N/A	N/A	N/A	N/A
Yu (2015)	Metagenomic analysis of faecal microbiome as a tool towards targeted non-invasive biomarkers for colorectal cancer	Gut	PRJEB10878	SAMEA3541481	Illumina HiSeq 2000	PAIRED	Non-healthy	Colorectal cancer	Adult	N/A	N/A	N/A	N/A	N/A	N/A	N/A	N/A	N/A	N/A	N/A	N/A
Yu (2015)	Metagenomic analysis of faecal microbiome as a tool towards targeted non-invasive biomarkers for colorectal cancer	Gut	PRJEB10878	SAMEA3541482	Illumina HiSeq 2000	PAIRED	Non-healthy	Colorectal cancer	Adult	N/A	N/A	N/A	N/A	N/A	N/A	N/A	N/A	N/A	N/A	N/A	N/A
Yu (2015)	Metagenomic analysis of faecal microbiome as a tool towards targeted non-invasive biomarkers for colorectal cancer	Gut	PRJEB10878	SAMEA3541483	Illumina HiSeq 2000	PAIRED	Non-healthy	Colorectal cancer	Adult	N/A	N/A	N/A	N/A	N/A	N/A	N/A	N/A	N/A	N/A	N/A	N/A
Yu (2015)	Metagenomic analysis of faecal microbiome as a tool towards targeted non-invasive biomarkers for colorectal cancer	Gut	PRJEB10878	SAMEA3541484	Illumina HiSeq 2000	PAIRED	Non-healthy	Colorectal cancer	Adult	N/A	N/A	N/A	N/A	N/A	N/A	N/A	N/A	N/A	N/A	N/A	N/A
Yu (2015)	Metagenomic analysis of faecal microbiome as a tool towards targeted non-invasive biomarkers for colorectal cancer	Gut	PRJEB10878	SAMEA3541487	Illumina HiSeq 2000	PAIRED	Non-healthy	Colorectal cancer	Adult	N/A	N/A	N/A	N/A	N/A	N/A	N/A	N/A	N/A	N/A	N/A	N/A
Yu (2015)	Metagenomic analysis of faecal microbiome as a tool towards targeted non-invasive biomarkers for colorectal cancer	Gut	PRJEB10878	SAMEA3541488	Illumina HiSeq 2000	PAIRED	Non-healthy	Colorectal cancer	Adult	N/A	N/A	N/A	N/A	N/A	N/A	N/A	N/A	N/A	N/A	N/A	N/A
Yu (2015)	Metagenomic analysis of faecal microbiome as a tool towards targeted non-invasive biomarkers for colorectal cancer	Gut	PRJEB10878	SAMEA3541490	Illumina HiSeq 2000	PAIRED	Non-healthy	Colorectal cancer	Adult	N/A	N/A	N/A	N/A	N/A	N/A	N/A	N/A	N/A	N/A	N/A	N/A
Yu (2015)	Metagenomic analysis of faecal microbiome as a tool towards targeted non-invasive biomarkers for colorectal cancer	Gut	PRJEB10878	SAMEA3541491	Illumina HiSeq 2000	PAIRED	Non-healthy	Colorectal cancer	Adult	N/A	N/A	N/A	N/A	N/A	N/A	N/A	N/A	N/A	N/A	N/A	N/A
Yu (2015)	Metagenomic analysis of faecal microbiome as a tool towards targeted non-invasive biomarkers for colorectal cancer	Gut	PRJEB10878	SAMEA3541492	Illumina HiSeq 2000	PAIRED	Non-healthy	Colorectal cancer	Adult	N/A	N/A	N/A	N/A	N/A	N/A	N/A	N/A	N/A	N/A	N/A	N/A
Yu (2015)	Metagenomic analysis of faecal microbiome as a tool towards targeted non-invasive biomarkers for colorectal cancer	Gut	PRJEB10878	SAMEA3541494	Illumina HiSeq 2000	PAIRED	Non-healthy	Colorectal cancer	Adult	N/A	N/A	N/A	N/A	N/A	N/A	N/A	N/A	N/A	N/A	N/A	N/A
Yu (2015)	Metagenomic analysis of faecal microbiome as a tool towards targeted non-invasive biomarkers for colorectal cancer	Gut	PRJEB10878	SAMEA3541495	Illumina HiSeq 2000	PAIRED	Non-healthy	Colorectal cancer	Adult	N/A	N/A	N/A	N/A	N/A	N/A	N/A	N/A	N/A	N/A	N/A	N/A
Yu (2015)	Metagenomic analysis of faecal microbiome as a tool towards targeted non-invasive biomarkers for colorectal cancer	Gut	PRJEB10878	SAMEA3541496	Illumina HiSeq 2000	PAIRED	Non-healthy	Colorectal cancer	Adult	N/A	N/A	N/A	N/A	N/A	N/A	N/A	N/A	N/A	N/A	N/A	N/A
Yu (2015)	Metagenomic analysis of faecal microbiome as a tool towards targeted non-invasive biomarkers for colorectal cancer	Gut	PRJEB10878	SAMEA3541497	Illumina HiSeq 2000	PAIRED	Non-healthy	Colorectal cancer	Adult	N/A	N/A	N/A	N/A	N/A	N/A	N/A	N/A	N/A	N/A	N/A	N/A
Yu (2015)	Metagenomic analysis of faecal microbiome as a tool towards targeted non-invasive biomarkers for colorectal cancer	Gut	PRJEB10878	SAMEA3541498	Illumina HiSeq 2000	PAIRED	Non-healthy	Colorectal cancer	Adult	N/A	N/A	N/A	N/A	N/A	N/A	N/A	N/A	N/A	N/A	N/A	N/A
Yu (2015)	Metagenomic analysis of faecal microbiome as a tool towards targeted non-invasive biomarkers for colorectal cancer	Gut	PRJEB10878	SAMEA3541499	Illumina HiSeq 2000	PAIRED	Non-healthy	Colorectal cancer	Adult	N/A	N/A	N/A	N/A	N/A	N/A	N/A	N/A	N/A	N/A	N/A	N/A
Yu (2015)	Metagenomic analysis of faecal microbiome as a tool towards targeted non-invasive biomarkers for colorectal cancer	Gut	PRJEB10878	SAMEA3541500	Illumina HiSeq 2000	PAIRED	Non-healthy	Colorectal cancer	Adult	N/A	N/A	N/A	N/A	N/A	N/A	N/A	N/A	N/A	N/A	N/A	N/A
Yu (2015)	Metagenomic analysis of faecal microbiome as a tool towards targeted non-invasive biomarkers for colorectal cancer	Gut	PRJEB10878	SAMEA3541502	Illumina HiSeq 2000	PAIRED	Non-healthy	Colorectal cancer	Adult	N/A	N/A	N/A	N/A	N/A	N/A	N/A	N/A	N/A	N/A	N/A	N/A
Yu (2015)	Metagenomic analysis of faecal microbiome as a tool towards targeted non-invasive biomarkers for colorectal cancer	Gut	PRJEB10878	SAMEA3541503	Illumina HiSeq 2000	PAIRED	Non-healthy	Colorectal cancer	Adult	N/A	N/A	N/A	N/A	N/A	N/A	N/A	N/A	N/A	N/A	N/A	N/A
Yu (2015)	Metagenomic analysis of faecal microbiome as a tool towards targeted non-invasive biomarkers for colorectal cancer	Gut	PRJEB10878	SAMEA3541504	Illumina HiSeq 2000	PAIRED	Non-healthy	Colorectal cancer	Adult	N/A	N/A	N/A	N/A	N/A	N/A	N/A	N/A	N/A	N/A	N/A	N/A
Yu (2015)	Metagenomic analysis of faecal microbiome as a tool towards targeted non-invasive biomarkers for colorectal cancer	Gut	PRJEB10878	SAMEA3541505	Illumina HiSeq 2000	PAIRED	Non-healthy	Colorectal cancer	Adult	N/A	N/A	N/A	N/A	N/A	N/A	N/A	N/A	N/A	N/A	N/A	N/A
Yu (2015)	Metagenomic analysis of faecal microbiome as a tool towards targeted non-invasive biomarkers for colorectal cancer	Gut	PRJEB10878	SAMEA3541506	Illumina HiSeq 2000	PAIRED	Non-healthy	Colorectal cancer	Adult	N/A	N/A	N/A	N/A	N/A	N/A	N/A	N/A	N/A	N/A	N/A	N/A
Yu (2015)	Metagenomic analysis of faecal microbiome as a tool towards targeted non-invasive biomarkers for colorectal cancer	Gut	PRJEB10878	SAMEA3541507	Illumina HiSeq 2000	PAIRED	Non-healthy	Colorectal cancer	Adult	N/A	N/A	N/A	N/A	N/A	N/A	N/A	N/A	N/A	N/A	N/A	N/A
Yu (2015)	Metagenomic analysis of faecal microbiome as a tool towards targeted non-invasive biomarkers for colorectal cancer	Gut	PRJEB10878	SAMEA3541508	Illumina HiSeq 2000	PAIRED	Non-healthy	Colorectal cancer	Adult	N/A	N/A	N/A	N/A	N/A	N/A	N/A	N/A	N/A	N/A	N/A	N/A
Yu (2015)	Metagenomic analysis of faecal microbiome as a tool towards targeted non-invasive biomarkers for colorectal cancer	Gut	PRJEB10878	SAMEA3541509	Illumina HiSeq 2000	PAIRED	Non-healthy	Colorectal cancer	Adult	N/A	N/A	N/A	N/A	N/A	N/A	N/A	N/A	N/A	N/A	N/A	N/A
Yu (2015)	Metagenomic analysis of faecal microbiome as a tool towards targeted non-invasive biomarkers for colorectal cancer	Gut	PRJEB10878	SAMEA3541510	Illumina HiSeq 2000	PAIRED	Non-healthy	Colorectal cancer	Adult	N/A	N/A	N/A	N/A	N/A	N/A	N/A	N/A	N/A	N/A	N/A	N/A
Yu (2015)	Metagenomic analysis of faecal microbiome as a tool towards targeted non-invasive biomarkers for colorectal cancer	Gut	PRJEB10878	SAMEA3541511	Illumina HiSeq 2000	PAIRED	Non-healthy	Colorectal cancer	Adult	N/A	N/A	N/A	N/A	N/A	N/A	N/A	N/A	N/A	N/A	N/A	N/A
Yu (2015)	Metagenomic analysis of faecal microbiome as a tool towards targeted non-invasive biomarkers for colorectal cancer	Gut	PRJEB10878	SAMEA3541512	Illumina HiSeq 2000	PAIRED	Non-healthy	Colorectal cancer	Adult	N/A	N/A	N/A	N/A	N/A	N/A	N/A	N/A	N/A	N/A	N/A	N/A
Yu (2015)	Metagenomic analysis of faecal microbiome as a tool towards targeted non-invasive biomarkers for colorectal cancer	Gut	PRJEB10878	SAMEA3541513	Illumina HiSeq 2000	PAIRED	Non-healthy	Colorectal cancer	Adult	N/A	N/A	N/A	N/A	N/A	N/A	N/A	N/A	N/A	N/A	N/A	N/A
Yu (2015)	Metagenomic analysis of faecal microbiome as a tool towards targeted non-invasive biomarkers for colorectal cancer	Gut	PRJEB10878	SAMEA3541514	Illumina HiSeq 2000	PAIRED	Non-healthy	Colorectal cancer	Adult	N/A	N/A	N/A	N/A	N/A	N/A	N/A	N/A	N/A	N/A	N/A	N/A
Yu (2015)	Metagenomic analysis of faecal microbiome as a tool towards targeted non-invasive biomarkers for colorectal cancer	Gut	PRJEB10878	SAMEA3541515	Illumina HiSeq 2000	PAIRED	Non-healthy	Colorectal cancer	Adult	N/A	N/A	N/A	N/A	N/A	N/A	N/A	N/A	N/A	N/A	N/A	N/A
Yu (2015)	Metagenomic analysis of faecal microbiome as a tool towards targeted non-invasive biomarkers for colorectal cancer	Gut	PRJEB10878	SAMEA3541525	Illumina HiSeq 2000	PAIRED	Non-healthy	Colorectal cancer	Adult	N/A	N/A	N/A	N/A	N/A	N/A	N/A	N/A	N/A	N/A	N/A	N/A
Yu (2015)	Metagenomic analysis of faecal microbiome as a tool towards targeted non-invasive biomarkers for colorectal cancer	Gut	PRJEB10878	SAMEA3541564	Illumina HiSeq 2000	PAIRED	Non-healthy	Colorectal cancer	Adult	N/A	N/A	N/A	N/A	N/A	N/A	N/A	N/A	N/A	N/A	N/A	N/A
Yu (2015)	Metagenomic analysis of faecal microbiome as a tool towards targeted non-invasive biomarkers for colorectal cancer	Gut	PRJEB10878	SAMEA3541565	Illumina HiSeq 2000	PAIRED	Non-healthy	Colorectal cancer	Adult	N/A	N/A	N/A	N/A	N/A	N/A	N/A	N/A	N/A	N/A	N/A	N/A
Yu (2015)	Metagenomic analysis of faecal microbiome as a tool towards targeted non-invasive biomarkers for colorectal cancer	Gut	PRJEB10878	SAMEA3541567	Illumina HiSeq 2000	PAIRED	Non-healthy	Colorectal cancer	Adult	N/A	N/A	N/A	N/A	N/A	N/A	N/A	N/A	N/A	N/A	N/A	N/A
Yu (2015)	Metagenomic analysis of faecal microbiome as a tool towards targeted non-invasive biomarkers for colorectal cancer	Gut	PRJEB10878	SAMEA3541568	Illumina HiSeq 2000	PAIRED	Non-healthy	Colorectal cancer	Adult	N/A	N/A	N/A	N/A	N/A	N/A	N/A	N/A	N/A	N/A	N/A	N/A
Yu (2015)	Metagenomic analysis of faecal microbiome as a tool towards targeted non-invasive biomarkers for colorectal cancer	Gut	PRJEB10878	SAMEA3541569	Illumina HiSeq 2000	PAIRED	Non-healthy	Colorectal cancer	Adult	N/A	N/A	N/A	N/A	N/A	N/A	N/A	N/A	N/A	N/A	N/A	N/A
Yu (2015)	Metagenomic analysis of faecal microbiome as a tool towards targeted non-invasive biomarkers for colorectal cancer	Gut	PRJEB10878	SAMEA3541570	Illumina HiSeq 2000	PAIRED	Non-healthy	Colorectal cancer	Adult	N/A	N/A	N/A	N/A	N/A	N/A	N/A	N/A	N/A	N/A	N/A	N/A
Yu (2015)	Metagenomic analysis of faecal microbiome as a tool towards targeted non-invasive biomarkers for colorectal cancer	Gut	PRJEB10878	SAMEA3541571	Illumina HiSeq 2000	PAIRED	Non-healthy	Colorectal cancer	Adult	N/A	N/A	N/A	N/A	N/A	N/A	N/A	N/A	N/A	N/A	N/A	N/A
Yu (2015)	Metagenomic analysis of faecal microbiome as a tool towards targeted non-invasive biomarkers for colorectal cancer	Gut	PRJEB10878	SAMEA3541572	Illumina HiSeq 2000	PAIRED	Non-healthy	Colorectal cancer	Adult	N/A	N/A	N/A	N/A	N/A	N/A	N/A	N/A	N/A	N/A	N/A	N/A
Yu (2015)	Metagenomic analysis of faecal microbiome as a tool towards targeted non-invasive biomarkers for colorectal cancer	Gut	PRJEB10878	SAMEA3541573	Illumina HiSeq 2000	PAIRED	Non-healthy	Colorectal cancer	Adult	N/A	N/A	N/A	N/A	N/A	N/A	N/A	N/A	N/A	N/A	N/A	N/A
Yu (2015)	Metagenomic analysis of faecal microbiome as a tool towards targeted non-invasive biomarkers for colorectal cancer	Gut	PRJEB10878	SAMEA3541574	Illumina HiSeq 2000	PAIRED	Non-healthy	Colorectal cancer	Adult	N/A	N/A	N/A	N/A	N/A	N/A	N/A	N/A	N/A	N/A	N/A	N/A
Yu (2015)	Metagenomic analysis of faecal microbiome as a tool towards targeted non-invasive biomarkers for colorectal cancer	Gut	PRJEB10878	SAMEA3541575	Illumina HiSeq 2000	PAIRED	Non-healthy	Colorectal cancer	Adult	N/A	N/A	N/A	N/A	N/A	N/A	N/A	N/A	N/A	N/A	N/A	N/A
Yu (2015)	Metagenomic analysis of faecal microbiome as a tool towards targeted non-invasive biomarkers for colorectal cancer	Gut	PRJEB10878	SAMEA3541576	Illumina HiSeq 2000	PAIRED	Non-healthy	Colorectal cancer	Adult	N/A	N/A	N/A	N/A	N/A	N/A	N/A	N/A	N/A	N/A	N/A	N/A
Yu (2015)	Metagenomic analysis of faecal microbiome as a tool towards targeted non-invasive biomarkers for colorectal cancer	Gut	PRJEB10878	SAMEA3541577	Illumina HiSeq 2000	PAIRED	Non-healthy	Colorectal cancer	Adult	N/A	N/A	N/A	N/A	N/A	N/A	N/A	N/A	N/A	N/A	N/A	N/A
Yu (2015)	Metagenomic analysis of faecal microbiome as a tool towards targeted non-invasive biomarkers for colorectal cancer	Gut	PRJEB10878	SAMEA3541578	Illumina HiSeq 2000	PAIRED	Non-healthy	Colorectal cancer	Adult	N/A	N/A	N/A	N/A	N/A	N/A	N/A	N/A	N/A	N/A	N/A	N/A
Yu (2015)	Metagenomic analysis of faecal microbiome as a tool towards targeted non-invasive biomarkers for colorectal cancer	Gut	PRJEB10878	SAMEA3541579	Illumina HiSeq 2000	PAIRED	Non-healthy	Colorectal cancer	Adult	N/A	N/A	N/A	N/A	N/A	N/A	N/A	N/A	N/A	N/A	N/A	N/A
Yu (2015)	Metagenomic analysis of faecal microbiome as a tool towards targeted non-invasive biomarkers for colorectal cancer	Gut	PRJEB10878	SAMEA3541580	Illumina HiSeq 2000	PAIRED	Non-healthy	Colorectal cancer	Adult	N/A	N/A	N/A	N/A	N/A	N/A	N/A	N/A	N/A	N/A	N/A	N/A
Yu (2015)	Metagenomic analysis of faecal microbiome as a tool towards targeted non-invasive biomarkers for colorectal cancer	Gut	PRJEB10878	SAMEA3541581	Illumina HiSeq 2000	PAIRED	Non-healthy	Colorectal cancer	Adult	N/A	N/A	N/A	N/A	N/A	N/A	N/A	N/A	N/A	N/A	N/A	N/A
Yu (2015)	Metagenomic analysis of faecal microbiome as a tool towards targeted non-invasive biomarkers for colorectal cancer	Gut	PRJEB10878	SAMEA3541582	Illumina HiSeq 2000	PAIRED	Non-healthy	Colorectal cancer	Adult	N/A	N/A	N/A	N/A	N/A	N/A	N/A	N/A	N/A	N/A	N/A	N/A
Yu (2015)	Metagenomic analysis of faecal microbiome as a tool towards targeted non-invasive biomarkers for colorectal cancer	Gut	PRJEB10878	SAMEA3541583	Illumina HiSeq 2000	PAIRED	Non-healthy	Colorectal cancer	Adult	N/A	N/A	N/A	N/A	N/A	N/A	N/A	N/A	N/A	N/A	N/A	N/A
Yu (2015)	Metagenomic analysis of faecal microbiome as a tool towards targeted non-invasive biomarkers for colorectal cancer	Gut	PRJEB10878	SAMEA3541584	Illumina HiSeq 2000	PAIRED	Non-healthy	Colorectal cancer	Adult	N/A	N/A	N/A	N/A	N/A	N/A	N/A	N/A	N/A	N/A	N/A	N/A
Yu (2015)	Metagenomic analysis of faecal microbiome as a tool towards targeted non-invasive biomarkers for colorectal cancer	Gut	PRJEB10878	SAMEA3541585	Illumina HiSeq 2000	PAIRED	Non-healthy	Colorectal cancer	Adult	N/A	N/A	N/A	N/A	N/A	N/A	N/A	N/A	N/A	N/A	N/A	N/A
Yu (2015)	Metagenomic analysis of faecal microbiome as a tool towards targeted non-invasive biomarkers for colorectal cancer	Gut	PRJEB10878	SAMEA3541586	Illumina HiSeq 2000	PAIRED	Non-healthy	Colorectal cancer	Adult	N/A	N/A	N/A	N/A	N/A	N/A	N/A	N/A	N/A	N/A	N/A	N/A
Yu (2015)	Metagenomic analysis of faecal microbiome as a tool towards targeted non-invasive biomarkers for colorectal cancer	Gut	PRJEB10878	SAMEA3541587	Illumina HiSeq 2000	PAIRED	Non-healthy	Colorectal cancer	Adult	N/A	N/A	N/A	N/A	N/A	N/A	N/A	N/A	N/A	N/A	N/A	N/A
Yu (2015)	Metagenomic analysis of faecal microbiome as a tool towards targeted non-invasive biomarkers for colorectal cancer	Gut	PRJEB10878	SAMEA3541588	Illumina HiSeq 2000	PAIRED	Non-healthy	Colorectal cancer	Adult	N/A	N/A	N/A	N/A	N/A	N/A	N/A	N/A	N/A	N/A	N/A	N/A
Yu (2015)	Metagenomic analysis of faecal microbiome as a tool towards targeted non-invasive biomarkers for colorectal cancer	Gut	PRJEB10878	SAMEA3541589	Illumina HiSeq 2000	PAIRED	Non-healthy	Colorectal cancer	Adult	N/A	N/A	N/A	N/A	N/A	N/A	N/A	N/A	N/A	N/A	N/A	N/A
Yu (2015)	Metagenomic analysis of faecal microbiome as a tool towards targeted non-invasive biomarkers for colorectal cancer	Gut	PRJEB10878	SAMEA3541590	Illumina HiSeq 2000	PAIRED	Non-healthy	Colorectal cancer	Adult	N/A	N/A	N/A	N/A	N/A	N/A	N/A	N/A	N/A	N/A	N/A	N/A
Yu (2015)	Metagenomic analysis of faecal microbiome as a tool towards targeted non-invasive biomarkers for colorectal cancer	Gut	PRJEB10878	SAMEA3541591	Illumina HiSeq 2000	PAIRED	Non-healthy	Colorectal cancer	Adult	N/A	N/A	N/A	N/A	N/A	N/A	N/A	N/A	N/A	N/A	N/A	N/A
Yu (2015)	Metagenomic analysis of faecal microbiome as a tool towards targeted non-invasive biomarkers for colorectal cancer	Gut	PRJEB10878	SAMEA3541594	Illumina HiSeq 2000	PAIRED	Non-healthy	Colorectal cancer	Adult	N/A	N/A	N/A	N/A	N/A	N/A	N/A	N/A	N/A	N/A	N/A	N/A
Yu (2015)	Metagenomic analysis of faecal microbiome as a tool towards targeted non-invasive biomarkers for colorectal cancer	Gut	PRJEB10878	SAMEA3541595	Illumina HiSeq 2000	PAIRED	Non-healthy	Colorectal cancer	Adult	N/A	N/A	N/A	N/A	N/A	N/A	N/A	N/A	N/A	N/A	N/A	N/A
Yu (2015)	Metagenomic analysis of faecal microbiome as a tool towards targeted non-invasive biomarkers for colorectal cancer	Gut	PRJEB10878	SAMEA3541596	Illumina HiSeq 2000	PAIRED	Non-healthy	Colorectal cancer	Adult	N/A	N/A	N/A	N/A	N/A	N/A	N/A	N/A	N/A	N/A	N/A	N/A
Nielsen (2014)	Identification and assembly of genomes and genetic elements in complex metagenomic samples without using reference genomes	Nature Biotechnology	PRJEB1220	SAMEA1968151	Illumina Genome Analyzer IIx	PAIRED	Non-healthy	Crohn's disease	38	Female	29.3848	N/A	N/A	N/A	N/A	N/A	N/A	N/A	N/A	N/A	N/A
Nielsen (2014)	Identification and assembly of genomes and genetic elements in complex metagenomic samples without using reference genomes	Nature Biotechnology	PRJEB1220	SAMEA2042014	Illumina Genome Analyzer IIx	PAIRED	Non-healthy	Crohn's disease	41	Female	20.202	N/A	N/A	N/A	N/A	N/A	N/A	N/A	N/A	N/A	N/A
Nielsen (2014)	Identification and assembly of genomes and genetic elements in complex metagenomic samples without using reference genomes	Nature Biotechnology	PRJEB1220	SAMEA2042103	Illumina Genome Analyzer IIx	PAIRED	Non-healthy	Crohn's disease	N/A	Female	N/A	N/A	N/A	N/A	N/A	N/A	N/A	N/A	N/A	N/A	N/A
Nielsen (2014)	Identification and assembly of genomes and genetic elements in complex metagenomic samples without using reference genomes	Nature Biotechnology	PRJEB1220	SAMEA2042106	Illumina Genome Analyzer IIx	PAIRED	Non-healthy	Crohn's disease	21	Male	23.4131	N/A	N/A	N/A	N/A	N/A	N/A	N/A	N/A	N/A	N/A
Nielsen (2014)	Identification and assembly of genomes and genetic elements in complex metagenomic samples without using reference genomes	Nature Biotechnology	PRJEB1220	SAMEA2042108	Illumina Genome Analyzer IIx	PAIRED	Non-healthy	Crohn's disease	18	Male	17.9634	N/A	N/A	N/A	N/A	N/A	N/A	N/A	N/A	N/A	N/A
Nielsen (2014)	Identification and assembly of genomes and genetic elements in complex metagenomic samples without using reference genomes	Nature Biotechnology	PRJEB1220	SAMEA2042111	Illumina Genome Analyzer IIx	PAIRED	Non-healthy	Crohn's disease	26	Male	21.5559	N/A	N/A	N/A	N/A	N/A	N/A	N/A	N/A	N/A	N/A
Nielsen (2014)	Identification and assembly of genomes and genetic elements in complex metagenomic samples without using reference genomes	Nature Biotechnology	PRJEB1220	SAMEA2042113	Illumina Genome Analyzer IIx	PAIRED	Non-healthy	Crohn's disease	34	Female	19.052	N/A	N/A	N/A	N/A	N/A	N/A	N/A	N/A	N/A	N/A
Nielsen (2014)	Identification and assembly of genomes and genetic elements in complex metagenomic samples without using reference genomes	Nature Biotechnology	PRJEB1220	SAMEA2042216	Illumina Genome Analyzer IIx	PAIRED	Non-healthy	Crohn's disease	41	Female	17.3134	N/A	N/A	N/A	N/A	N/A	N/A	N/A	N/A	N/A	N/A
Nielsen (2014)	Identification and assembly of genomes and genetic elements in complex metagenomic samples without using reference genomes	Nature Biotechnology	PRJEB1220	SAMEA2042225	Illumina Genome Analyzer IIx	PAIRED	Non-healthy	Crohn's disease	27	Female	29.4118	N/A	N/A	N/A	N/A	N/A	N/A	N/A	N/A	N/A	N/A
Nielsen (2014)	Identification and assembly of genomes and genetic elements in complex metagenomic samples without using reference genomes	Nature Biotechnology	PRJEB1220	SAMEA2042395	Illumina Genome Analyzer IIx	PAIRED	Non-healthy	Crohn's disease	25	Female	19.0443	N/A	N/A	N/A	N/A	N/A	N/A	N/A	N/A	N/A	N/A
Nielsen (2014)	Identification and assembly of genomes and genetic elements in complex metagenomic samples without using reference genomes	Nature Biotechnology	PRJEB1220	SAMEA1963786	Illumina Genome Analyzer IIx	PAIRED	Non-healthy	Crohn's disease	36	Female	19.7711	N/A	N/A	N/A	N/A	N/A	N/A	N/A	N/A	N/A	N/A
Nielsen (2014)	Identification and assembly of genomes and genetic elements in complex metagenomic samples without using reference genomes	Nature Biotechnology	PRJEB1220	SAMEA2042399	Illumina Genome Analyzer IIx	PAIRED	Non-healthy	Crohn's disease	22	Male	19.4874	N/A	N/A	N/A	N/A	N/A	N/A	N/A	N/A	N/A	N/A
Hall (2017)	A novel Ruminococcus gnavus clade enriched in inflammatory bowel disease patients	Genome Medicine	PRJNA385949	SAMN07199873	Illumina HiSeq 2000	PAIRED	Non-healthy	Crohn's disease	Adult	N/A	N/A	N/A	N/A	N/A	N/A	N/A	N/A	N/A	N/A	N/A	N/A
Hall (2017)	A novel Ruminococcus gnavus clade enriched in inflammatory bowel disease patients	Genome Medicine	PRJNA385949	SAMN07199931	Illumina HiSeq 2000	PAIRED	Non-healthy	Crohn's disease	Adult	N/A	N/A	N/A	N/A	N/A	N/A	N/A	N/A	N/A	N/A	N/A	N/A
Hall (2017)	A novel Ruminococcus gnavus clade enriched in inflammatory bowel disease patients	Genome Medicine	PRJNA385949	SAMN07199841	Illumina HiSeq 2000	PAIRED	Non-healthy	Crohn's disease	Adult	N/A	N/A	N/A	N/A	N/A	N/A	N/A	N/A	N/A	N/A	N/A	N/A
Hall (2017)	A novel Ruminococcus gnavus clade enriched in inflammatory bowel disease patients	Genome Medicine	PRJNA385949	SAMN07199828	Illumina HiSeq 2000	PAIRED	Non-healthy	Crohn's disease	Adult	N/A	N/A	N/A	N/A	N/A	N/A	N/A	N/A	N/A	N/A	N/A	N/A
Hall (2017)	A novel Ruminococcus gnavus clade enriched in inflammatory bowel disease patients	Genome Medicine	PRJNA385949	SAMN07199909	Illumina HiSeq 2000	PAIRED	Non-healthy	Crohn's disease	Adult	N/A	N/A	N/A	N/A	N/A	N/A	N/A	N/A	N/A	N/A	N/A	N/A
Hall (2017)	A novel Ruminococcus gnavus clade enriched in inflammatory bowel disease patients	Genome Medicine	PRJNA385949	SAMN07199974	Illumina HiSeq 2000	PAIRED	Non-healthy	Crohn's disease	Adult	N/A	N/A	N/A	N/A	N/A	N/A	N/A	N/A	N/A	N/A	N/A	N/A
Schirmer (2018)	Dynamics of metatranscription in the inflammatory bowel disease gut microbiome	Nature Microbiology	PRJNA389280	SAMN07424252	Illumina HiSeq 2000	PAIRED	Non-healthy	Crohn's disease	30	Male	N/A	N/A	N/A	N/A	N/A	N/A	N/A	N/A	Yes	N/A	Yes
Schirmer (2018)	Dynamics of metatranscription in the inflammatory bowel disease gut microbiome	Nature Microbiology	PRJNA389280	SAMN07424251	Illumina HiSeq 2000	PAIRED	Non-healthy	Crohn's disease	26	Male	N/A	N/A	N/A	N/A	N/A	N/A	N/A	N/A	Yes	N/A	Yes
Schirmer (2018)	Dynamics of metatranscription in the inflammatory bowel disease gut microbiome	Nature Microbiology	PRJNA389280	SAMN07424253	Illumina HiSeq 2000	PAIRED	Non-healthy	Crohn's disease	30	Female	N/A	N/A	N/A	N/A	N/A	N/A	N/A	N/A	Yes	N/A	Yes
Schirmer (2018)	Dynamics of metatranscription in the inflammatory bowel disease gut microbiome	Nature Microbiology	PRJNA389280	SAMN07424259	Illumina HiSeq 2000	PAIRED	Non-healthy	Crohn's disease	43	Female	N/A	N/A	N/A	N/A	N/A	N/A	N/A	N/A	N/A	N/A	N/A
Schirmer (2018)	Dynamics of metatranscription in the inflammatory bowel disease gut microbiome	Nature Microbiology	PRJNA389280	SAMN07424287	Illumina HiSeq 2000	PAIRED	Non-healthy	Crohn's disease	14	Male	N/A	N/A	N/A	N/A	N/A	N/A	N/A	N/A	Yes	N/A	N/A
Schirmer (2018)	Dynamics of metatranscription in the inflammatory bowel disease gut microbiome	Nature Microbiology	PRJNA389280	SAMN07424263	Illumina HiSeq 2000	PAIRED	Non-healthy	Crohn's disease	76	Female	N/A	N/A	N/A	N/A	N/A	N/A	N/A	N/A	Yes	N/A	Yes
Schirmer (2018)	Dynamics of metatranscription in the inflammatory bowel disease gut microbiome	Nature Microbiology	PRJNA389280	SAMN07424267	Illumina HiSeq 2000	PAIRED	Non-healthy	Crohn's disease	41	Male	N/A	N/A	N/A	N/A	N/A	N/A	N/A	N/A	Yes	N/A	N/A
Schirmer (2018)	Dynamics of metatranscription in the inflammatory bowel disease gut microbiome	Nature Microbiology	PRJNA389280	SAMN07424265	Illumina HiSeq 2000	PAIRED	Non-healthy	Crohn's disease	24	Female	N/A	N/A	N/A	N/A	N/A	N/A	N/A	N/A	Yes	N/A	Yes
Schirmer (2018)	Dynamics of metatranscription in the inflammatory bowel disease gut microbiome	Nature Microbiology	PRJNA389280	SAMN07424309	Illumina HiSeq 2000	PAIRED	Non-healthy	Crohn's disease	53	Female	N/A	N/A	N/A	N/A	N/A	N/A	N/A	N/A	Yes	N/A	Yes
Schirmer (2018)	Dynamics of metatranscription in the inflammatory bowel disease gut microbiome	Nature Microbiology	PRJNA389280	SAMN07424524	Illumina HiSeq 2000	PAIRED	Non-healthy	Crohn's disease	15	Male	N/A	N/A	N/A	N/A	N/A	N/A	N/A	N/A	Yes	N/A	N/A
Schirmer (2018)	Dynamics of metatranscription in the inflammatory bowel disease gut microbiome	Nature Microbiology	PRJNA389280	SAMN07424387	Illumina HiSeq 2000	PAIRED	Non-healthy	Crohn's disease	15	Female	N/A	N/A	N/A	N/A	N/A	N/A	N/A	N/A	N/A	N/A	N/A
Schirmer (2018)	Dynamics of metatranscription in the inflammatory bowel disease gut microbiome	Nature Microbiology	PRJNA389280	SAMN07424384	Illumina HiSeq 2000	PAIRED	Non-healthy	Crohn's disease	17	Female	N/A	N/A	N/A	N/A	N/A	N/A	N/A	N/A	Yes	N/A	N/A
Schirmer (2018)	Dynamics of metatranscription in the inflammatory bowel disease gut microbiome	Nature Microbiology	PRJNA389280	SAMN07424382	Illumina HiSeq 2000	PAIRED	Non-healthy	Crohn's disease	37	Female	N/A	N/A	N/A	N/A	N/A	N/A	N/A	N/A	N/A	N/A	Yes
Schirmer (2018)	Dynamics of metatranscription in the inflammatory bowel disease gut microbiome	Nature Microbiology	PRJNA389280	SAMN07424440	Illumina HiSeq 2000	PAIRED	Non-healthy	Crohn's disease	12	Male	N/A	N/A	N/A	N/A	N/A	N/A	N/A	N/A	Yes	N/A	N/A
Schirmer (2018)	Dynamics of metatranscription in the inflammatory bowel disease gut microbiome	Nature Microbiology	PRJNA389280	SAMN07424503	Illumina HiSeq 2000	PAIRED	Non-healthy	Crohn's disease	12	Male	N/A	N/A	N/A	N/A	N/A	N/A	N/A	N/A	Yes	N/A	N/A
Schirmer (2018)	Dynamics of metatranscription in the inflammatory bowel disease gut microbiome	Nature Microbiology	PRJNA389280	SAMN07424501	Illumina HiSeq 2000	PAIRED	Non-healthy	Crohn's disease	16	Male	N/A	N/A	N/A	N/A	N/A	N/A	N/A	N/A	Yes	N/A	N/A
Schirmer (2018)	Dynamics of metatranscription in the inflammatory bowel disease gut microbiome	Nature Microbiology	PRJNA389280	SAMN07424398	Illumina HiSeq 2000	PAIRED	Non-healthy	Crohn's disease	45	Male	N/A	N/A	N/A	N/A	N/A	N/A	N/A	N/A	Yes	N/A	Yes
Schirmer (2018)	Dynamics of metatranscription in the inflammatory bowel disease gut microbiome	Nature Microbiology	PRJNA389280	SAMN07424508	Illumina HiSeq 2000	PAIRED	Non-healthy	Crohn's disease	13	Female	N/A	N/A	N/A	N/A	N/A	N/A	N/A	N/A	Yes	N/A	N/A
Schirmer (2018)	Dynamics of metatranscription in the inflammatory bowel disease gut microbiome	Nature Microbiology	PRJNA389280	SAMN07424367	Illumina HiSeq 2000	PAIRED	Non-healthy	Crohn's disease	15	Female	N/A	N/A	N/A	N/A	N/A	N/A	N/A	N/A	Yes	N/A	N/A
Schirmer (2018)	Dynamics of metatranscription in the inflammatory bowel disease gut microbiome	Nature Microbiology	PRJNA389280	SAMN07424437	Illumina HiSeq 2000	PAIRED	Non-healthy	Crohn's disease	19	Female	N/A	N/A	N/A	N/A	N/A	N/A	N/A	N/A	Yes	N/A	N/A
Schirmer (2018)	Dynamics of metatranscription in the inflammatory bowel disease gut microbiome	Nature Microbiology	PRJNA389280	SAMN07424492	Illumina HiSeq 2000	PAIRED	Non-healthy	Crohn's disease	60	Male	N/A	N/A	N/A	N/A	N/A	N/A	N/A	N/A	Yes	N/A	Yes
Schirmer (2018)	Dynamics of metatranscription in the inflammatory bowel disease gut microbiome	Nature Microbiology	PRJNA389280	SAMN07424493	Illumina HiSeq 2000	PAIRED	Non-healthy	Crohn's disease	44	Male	N/A	N/A	N/A	N/A	N/A	N/A	N/A	N/A	Yes	N/A	Yes
Schirmer (2018)	Dynamics of metatranscription in the inflammatory bowel disease gut microbiome	Nature Microbiology	PRJNA389280	SAMN07424417	Illumina HiSeq 2000	PAIRED	Non-healthy	Crohn's disease	40	Female	N/A	N/A	N/A	N/A	N/A	N/A	N/A	N/A	Yes	N/A	N/A
Schirmer (2018)	Dynamics of metatranscription in the inflammatory bowel disease gut microbiome	Nature Microbiology	PRJNA389280	SAMN07424416	Illumina HiSeq 2000	PAIRED	Non-healthy	Crohn's disease	10	Male	N/A	N/A	N/A	N/A	N/A	N/A	N/A	N/A	Yes	N/A	N/A
Schirmer (2018)	Dynamics of metatranscription in the inflammatory bowel disease gut microbiome	Nature Microbiology	PRJNA389280	SAMN07424404	Illumina HiSeq 2000	PAIRED	Non-healthy	Crohn's disease	39	Female	N/A	N/A	N/A	N/A	N/A	N/A	N/A	N/A	Yes	N/A	Yes
Schirmer (2018)	Dynamics of metatranscription in the inflammatory bowel disease gut microbiome	Nature Microbiology	PRJNA389280	SAMN07424419	Illumina HiSeq 2000	PAIRED	Non-healthy	Crohn's disease	16	Male	N/A	N/A	N/A	N/A	N/A	N/A	N/A	N/A	Yes	N/A	N/A
Schirmer (2018)	Dynamics of metatranscription in the inflammatory bowel disease gut microbiome	Nature Microbiology	PRJNA389280	SAMN07424423	Illumina HiSeq 2000	PAIRED	Non-healthy	Crohn's disease	16	Male	N/A	N/A	N/A	N/A	N/A	N/A	N/A	N/A	Yes	N/A	N/A
Schirmer (2018)	Dynamics of metatranscription in the inflammatory bowel disease gut microbiome	Nature Microbiology	PRJNA389280	SAMN07424329	Illumina HiSeq 2000	PAIRED	Non-healthy	Crohn's disease	18	Male	N/A	N/A	N/A	N/A	N/A	N/A	N/A	N/A	N/A	N/A	N/A
Schirmer (2018)	Dynamics of metatranscription in the inflammatory bowel disease gut microbiome	Nature Microbiology	PRJNA389280	SAMN07424330	Illumina HiSeq 2000	PAIRED	Non-healthy	Crohn's disease	43	Female	N/A	N/A	N/A	N/A	N/A	N/A	N/A	N/A	Yes	N/A	N/A
Schirmer (2018)	Dynamics of metatranscription in the inflammatory bowel disease gut microbiome	Nature Microbiology	PRJNA389280	SAMN07424338	Illumina HiSeq 2000	PAIRED	Non-healthy	Crohn's disease	15	Male	N/A	N/A	N/A	N/A	N/A	N/A	N/A	N/A	Yes	N/A	N/A
Schirmer (2018)	Dynamics of metatranscription in the inflammatory bowel disease gut microbiome	Nature Microbiology	PRJNA389280	SAMN07424394	Illumina HiSeq 2000	PAIRED	Non-healthy	Crohn's disease	32	Female	N/A	N/A	N/A	N/A	N/A	N/A	N/A	N/A	Yes	N/A	Yes
Schirmer (2018)	Dynamics of metatranscription in the inflammatory bowel disease gut microbiome	Nature Microbiology	PRJNA389280	SAMN07424485	Illumina HiSeq 2000	PAIRED	Non-healthy	Crohn's disease	25	Female	N/A	N/A	N/A	N/A	N/A	N/A	N/A	N/A	N/A	N/A	N/A
Schirmer (2018)	Dynamics of metatranscription in the inflammatory bowel disease gut microbiome	Nature Microbiology	PRJNA389280	SAMN07424479	Illumina HiSeq 2000	PAIRED	Non-healthy	Crohn's disease	11	Male	N/A	N/A	N/A	N/A	N/A	N/A	N/A	N/A	Yes	N/A	N/A
Schirmer (2018)	Dynamics of metatranscription in the inflammatory bowel disease gut microbiome	Nature Microbiology	PRJNA389280	SAMN07424399	Illumina HiSeq 2000	PAIRED	Non-healthy	Crohn's disease	13	Male	N/A	N/A	N/A	N/A	N/A	N/A	N/A	N/A	Yes	N/A	N/A
Schirmer (2018)	Dynamics of metatranscription in the inflammatory bowel disease gut microbiome	Nature Microbiology	PRJNA389280	SAMN07424472	Illumina HiSeq 2000	PAIRED	Non-healthy	Crohn's disease	22	Male	N/A	N/A	N/A	N/A	N/A	N/A	N/A	N/A	Yes	N/A	Yes
Schirmer (2018)	Dynamics of metatranscription in the inflammatory bowel disease gut microbiome	Nature Microbiology	PRJNA389280	SAMN07424536	Illumina HiSeq 2000	PAIRED	Non-healthy	Crohn's disease	47	Female	N/A	N/A	N/A	N/A	N/A	N/A	N/A	N/A	Yes	N/A	Yes
Schirmer (2018)	Dynamics of metatranscription in the inflammatory bowel disease gut microbiome	Nature Microbiology	PRJNA389280	SAMN07424378	Illumina HiSeq 2000	PAIRED	Non-healthy	Crohn's disease	16	Female	N/A	N/A	N/A	N/A	N/A	N/A	N/A	N/A	Yes	N/A	N/A
Schirmer (2018)	Dynamics of metatranscription in the inflammatory bowel disease gut microbiome	Nature Microbiology	PRJNA389280	SAMN07424369	Illumina HiSeq 2000	PAIRED	Non-healthy	Crohn's disease	51	Female	N/A	N/A	N/A	N/A	N/A	N/A	N/A	N/A	Yes	N/A	Yes
Schirmer (2018)	Dynamics of metatranscription in the inflammatory bowel disease gut microbiome	Nature Microbiology	PRJNA389280	SAMN07424372	Illumina HiSeq 2000	PAIRED	Non-healthy	Crohn's disease	10	Female	N/A	N/A	N/A	N/A	N/A	N/A	N/A	N/A	Yes	N/A	N/A
Schirmer (2018)	Dynamics of metatranscription in the inflammatory bowel disease gut microbiome	Nature Microbiology	PRJNA389280	SAMN07424467	Illumina HiSeq 2000	PAIRED	Non-healthy	Crohn's disease	56	Male	N/A	N/A	N/A	N/A	N/A	N/A	N/A	N/A	N/A	N/A	N/A
Schirmer (2018)	Dynamics of metatranscription in the inflammatory bowel disease gut microbiome	Nature Microbiology	PRJNA389280	SAMN07424460	Illumina HiSeq 2000	PAIRED	Non-healthy	Crohn's disease	15	Male	N/A	N/A	N/A	N/A	N/A	N/A	N/A	N/A	Yes	N/A	N/A
Schirmer (2018)	Dynamics of metatranscription in the inflammatory bowel disease gut microbiome	Nature Microbiology	PRJNA389280	SAMN07424464	Illumina HiSeq 2000	PAIRED	Non-healthy	Crohn's disease	22	Female	N/A	N/A	N/A	N/A	N/A	N/A	N/A	N/A	N/A	N/A	N/A
Schirmer (2018)	Dynamics of metatranscription in the inflammatory bowel disease gut microbiome	Nature Microbiology	PRJNA389280	SAMN07424465	Illumina HiSeq 2000	PAIRED	Non-healthy	Crohn's disease	15	Male	N/A	N/A	N/A	N/A	N/A	N/A	N/A	N/A	Yes	N/A	N/A
He (2017)	Two distinct metacommunities characterize the gut microbiota in Crohn's disease patients	Gigascience	PRJEB15371	SAMEA4431868	Illumina Hiseq 2000	PAIRED	Non-healthy	Crohn's disease	48	Male	22.3183	N/A	N/A	N/A	N/A	N/A	N/A	N/A	N/A	N/A	N/A
He (2017)	Two distinct metacommunities characterize the gut microbiota in Crohn's disease patients	Gigascience	PRJEB15371	SAMEA4431869	Illumina Hiseq 2000	PAIRED	Non-healthy	Crohn's disease	22	Male	18.2183	N/A	N/A	N/A	N/A	N/A	N/A	N/A	N/A	N/A	N/A
He (2017)	Two distinct metacommunities characterize the gut microbiota in Crohn's disease patients	Gigascience	PRJEB15371	SAMEA4431870	Illumina Hiseq 2000	PAIRED	Non-healthy	Crohn's disease	27	Female	16.1833	N/A	N/A	N/A	N/A	N/A	N/A	N/A	N/A	N/A	N/A
He (2017)	Two distinct metacommunities characterize the gut microbiota in Crohn's disease patients	Gigascience	PRJEB15371	SAMEA4431871	Illumina Hiseq 2000	PAIRED	Non-healthy	Crohn's disease	16	Male	16.4014	N/A	N/A	N/A	N/A	N/A	N/A	N/A	N/A	N/A	N/A
He (2017)	Two distinct metacommunities characterize the gut microbiota in Crohn's disease patients	Gigascience	PRJEB15371	SAMEA4431872	Illumina Hiseq 2000	PAIRED	Non-healthy	Crohn's disease	22	Female	13.219	N/A	N/A	N/A	N/A	N/A	N/A	N/A	N/A	N/A	N/A
He (2017)	Two distinct metacommunities characterize the gut microbiota in Crohn's disease patients	Gigascience	PRJEB15371	SAMEA4431873	Illumina Hiseq 2000	PAIRED	Non-healthy	Crohn's disease	39	Female	17.6483	N/A	N/A	N/A	N/A	N/A	N/A	N/A	N/A	N/A	N/A
He (2017)	Two distinct metacommunities characterize the gut microbiota in Crohn's disease patients	Gigascience	PRJEB15371	SAMEA4431875	Illumina Hiseq 2000	PAIRED	Non-healthy	Crohn's disease	43	Female	14.6211	N/A	N/A	N/A	N/A	N/A	N/A	N/A	N/A	N/A	N/A
He (2017)	Two distinct metacommunities characterize the gut microbiota in Crohn's disease patients	Gigascience	PRJEB15371	SAMEA4431876	Illumina Hiseq 2000	PAIRED	Non-healthy	Crohn's disease	27	Male	18.5078	N/A	N/A	N/A	N/A	N/A	N/A	N/A	N/A	N/A	N/A
He (2017)	Two distinct metacommunities characterize the gut microbiota in Crohn's disease patients	Gigascience	PRJEB15371	SAMEA4431877	Illumina Hiseq 2000	PAIRED	Non-healthy	Crohn's disease	27	Male	16.038	N/A	N/A	N/A	N/A	N/A	N/A	N/A	N/A	N/A	N/A
He (2017)	Two distinct metacommunities characterize the gut microbiota in Crohn's disease patients	Gigascience	PRJEB15371	SAMEA4431878	Illumina Hiseq 2000	PAIRED	Non-healthy	Crohn's disease	22	Male	18.3642	N/A	N/A	N/A	N/A	N/A	N/A	N/A	N/A	N/A	N/A
He (2017)	Two distinct metacommunities characterize the gut microbiota in Crohn's disease patients	Gigascience	PRJEB15371	SAMEA4431879	Illumina Hiseq 2000	PAIRED	Non-healthy	Crohn's disease	42	Female	24.905	N/A	N/A	N/A	N/A	N/A	N/A	N/A	N/A	N/A	N/A
He (2017)	Two distinct metacommunities characterize the gut microbiota in Crohn's disease patients	Gigascience	PRJEB15371	SAMEA4431880	Illumina Hiseq 2000	PAIRED	Non-healthy	Crohn's disease	29	Male	16.5298	N/A	N/A	N/A	N/A	N/A	N/A	N/A	N/A	N/A	N/A
He (2017)	Two distinct metacommunities characterize the gut microbiota in Crohn's disease patients	Gigascience	PRJEB15371	SAMEA4431881	Illumina Hiseq 2000	PAIRED	Non-healthy	Crohn's disease	21	Male	19.6235	N/A	N/A	N/A	N/A	N/A	N/A	N/A	N/A	N/A	N/A
He (2017)	Two distinct metacommunities characterize the gut microbiota in Crohn's disease patients	Gigascience	PRJEB15371	SAMEA4431883	Illumina Hiseq 2000	PAIRED	Non-healthy	Crohn's disease	31	Male	17.8915	N/A	N/A	N/A	N/A	N/A	N/A	N/A	N/A	N/A	N/A
He (2017)	Two distinct metacommunities characterize the gut microbiota in Crohn's disease patients	Gigascience	PRJEB15371	SAMEA4431884	Illumina Hiseq 2000	PAIRED	Non-healthy	Crohn's disease	28	Female	16.7578	N/A	N/A	N/A	N/A	N/A	N/A	N/A	N/A	N/A	N/A
He (2017)	Two distinct metacommunities characterize the gut microbiota in Crohn's disease patients	Gigascience	PRJEB15371	SAMEA4431885	Illumina Hiseq 2000	PAIRED	Non-healthy	Crohn's disease	33	Male	23.2197	N/A	N/A	N/A	N/A	N/A	N/A	N/A	N/A	N/A	N/A
He (2017)	Two distinct metacommunities characterize the gut microbiota in Crohn's disease patients	Gigascience	PRJEB15371	SAMEA4431887	Illumina Hiseq 2000	PAIRED	Non-healthy	Crohn's disease	29	Male	20.9306	N/A	N/A	N/A	N/A	N/A	N/A	N/A	N/A	N/A	N/A
He (2017)	Two distinct metacommunities characterize the gut microbiota in Crohn's disease patients	Gigascience	PRJEB15371	SAMEA4431888	Illumina Hiseq 2000	PAIRED	Non-healthy	Crohn's disease	29	Male	15.427	N/A	N/A	N/A	N/A	N/A	N/A	N/A	N/A	N/A	N/A
He (2017)	Two distinct metacommunities characterize the gut microbiota in Crohn's disease patients	Gigascience	PRJEB15371	SAMEA4431889	Illumina Hiseq 2000	PAIRED	Non-healthy	Crohn's disease	23	Male	22.8571	N/A	N/A	N/A	N/A	N/A	N/A	N/A	N/A	N/A	N/A
He (2017)	Two distinct metacommunities characterize the gut microbiota in Crohn's disease patients	Gigascience	PRJEB15371	SAMEA4431891	Illumina Hiseq 2000	PAIRED	Non-healthy	Crohn's disease	44	Female	20.9042	N/A	N/A	N/A	N/A	N/A	N/A	N/A	N/A	N/A	N/A
He (2017)	Two distinct metacommunities characterize the gut microbiota in Crohn's disease patients	Gigascience	PRJEB15371	SAMEA4431893	Illumina Hiseq 2000	PAIRED	Non-healthy	Crohn's disease	36	Male	17.4674	N/A	N/A	N/A	N/A	N/A	N/A	N/A	N/A	N/A	N/A
He (2017)	Two distinct metacommunities characterize the gut microbiota in Crohn's disease patients	Gigascience	PRJEB15371	SAMEA4431895	Illumina Hiseq 2000	PAIRED	Non-healthy	Crohn's disease	31	Male	21.9713	N/A	N/A	N/A	N/A	N/A	N/A	N/A	N/A	N/A	N/A
He (2017)	Two distinct metacommunities characterize the gut microbiota in Crohn's disease patients	Gigascience	PRJEB15371	SAMEA4431896	Illumina Hiseq 2000	PAIRED	Non-healthy	Crohn's disease	25	Male	19.0117	N/A	N/A	N/A	N/A	N/A	N/A	N/A	N/A	N/A	N/A
He (2017)	Two distinct metacommunities characterize the gut microbiota in Crohn's disease patients	Gigascience	PRJEB15371	SAMEA4431898	Illumina Hiseq 2000	PAIRED	Non-healthy	Crohn's disease	23	Male	22.4913	N/A	N/A	N/A	N/A	N/A	N/A	N/A	N/A	N/A	N/A
He (2017)	Two distinct metacommunities characterize the gut microbiota in Crohn's disease patients	Gigascience	PRJEB15371	SAMEA4431899	Illumina Hiseq 2000	PAIRED	Non-healthy	Crohn's disease	40	Female	21.8264	N/A	N/A	N/A	N/A	N/A	N/A	N/A	N/A	N/A	N/A
He (2017)	Two distinct metacommunities characterize the gut microbiota in Crohn's disease patients	Gigascience	PRJEB15371	SAMEA4431901	Illumina Hiseq 2000	PAIRED	Non-healthy	Crohn's disease	30	Male	19.487	N/A	N/A	N/A	N/A	N/A	N/A	N/A	N/A	N/A	N/A
He (2017)	Two distinct metacommunities characterize the gut microbiota in Crohn's disease patients	Gigascience	PRJEB15371	SAMEA4431902	Illumina Hiseq 2000	PAIRED	Non-healthy	Crohn's disease	39	Female	20	N/A	N/A	N/A	N/A	N/A	N/A	N/A	N/A	N/A	N/A
He (2017)	Two distinct metacommunities characterize the gut microbiota in Crohn's disease patients	Gigascience	PRJEB15371	SAMEA4431903	Illumina Hiseq 2000	PAIRED	Non-healthy	Crohn's disease	27	Male	19.3625	N/A	N/A	N/A	N/A	N/A	N/A	N/A	N/A	N/A	N/A
He (2017)	Two distinct metacommunities characterize the gut microbiota in Crohn's disease patients	Gigascience	PRJEB15371	SAMEA4431904	Illumina Hiseq 2000	PAIRED	Non-healthy	Crohn's disease	30	Male	22.0343	N/A	N/A	N/A	N/A	N/A	N/A	N/A	N/A	N/A	N/A
He (2017)	Two distinct metacommunities characterize the gut microbiota in Crohn's disease patients	Gigascience	PRJEB15371	SAMEA4431905	Illumina Hiseq 2000	PAIRED	Non-healthy	Crohn's disease	35	Male	20.5714	N/A	N/A	N/A	N/A	N/A	N/A	N/A	N/A	N/A	N/A
He (2017)	Two distinct metacommunities characterize the gut microbiota in Crohn's disease patients	Gigascience	PRJEB15371	SAMEA4431906	Illumina Hiseq 2000	PAIRED	Non-healthy	Crohn's disease	28	Male	18.0344	N/A	N/A	N/A	N/A	N/A	N/A	N/A	N/A	N/A	N/A
He (2017)	Two distinct metacommunities characterize the gut microbiota in Crohn's disease patients	Gigascience	PRJEB15371	SAMEA4431907	Illumina Hiseq 2000	PAIRED	Non-healthy	Crohn's disease	24	Male	23.261	N/A	N/A	N/A	N/A	N/A	N/A	N/A	N/A	N/A	N/A
He (2017)	Two distinct metacommunities characterize the gut microbiota in Crohn's disease patients	Gigascience	PRJEB15371	SAMEA4431908	Illumina Hiseq 2000	PAIRED	Non-healthy	Crohn's disease	25	Male	18.8268	N/A	N/A	N/A	N/A	N/A	N/A	N/A	N/A	N/A	N/A
He (2017)	Two distinct metacommunities characterize the gut microbiota in Crohn's disease patients	Gigascience	PRJEB15371	SAMEA4431909	Illumina Hiseq 2000	PAIRED	Non-healthy	Crohn's disease	18	Male	23.7253	N/A	N/A	N/A	N/A	N/A	N/A	N/A	N/A	N/A	N/A
He (2017)	Two distinct metacommunities characterize the gut microbiota in Crohn's disease patients	Gigascience	PRJEB15371	SAMEA4431910	Illumina Hiseq 2000	PAIRED	Non-healthy	Crohn's disease	N/A	N/A	N/A	N/A	N/A	N/A	N/A	N/A	N/A	N/A	N/A	N/A	N/A
He (2017)	Two distinct metacommunities characterize the gut microbiota in Crohn's disease patients	Gigascience	PRJEB15371	SAMEA4431913	Illumina Hiseq 2000	PAIRED	Non-healthy	Crohn's disease	15	Male	18.3299	N/A	N/A	N/A	N/A	N/A	N/A	N/A	N/A	N/A	N/A
He (2017)	Two distinct metacommunities characterize the gut microbiota in Crohn's disease patients	Gigascience	PRJEB15371	SAMEA4431914	Illumina Hiseq 2000	PAIRED	Non-healthy	Crohn's disease	40	Male	18.2857	N/A	N/A	N/A	N/A	N/A	N/A	N/A	N/A	N/A	N/A
He (2017)	Two distinct metacommunities characterize the gut microbiota in Crohn's disease patients	Gigascience	PRJEB15371	SAMEA4431915	Illumina Hiseq 2000	PAIRED	Non-healthy	Crohn's disease	35	Male	24.423	N/A	N/A	N/A	N/A	N/A	N/A	N/A	N/A	N/A	N/A
He (2017)	Two distinct metacommunities characterize the gut microbiota in Crohn's disease patients	Gigascience	PRJEB15371	SAMEA4431916	Illumina Hiseq 2000	PAIRED	Non-healthy	Crohn's disease	42	Male	16.9967	N/A	N/A	N/A	N/A	N/A	N/A	N/A	N/A	N/A	N/A
He (2017)	Two distinct metacommunities characterize the gut microbiota in Crohn's disease patients	Gigascience	PRJEB15371	SAMEA4431917	Illumina Hiseq 2000	PAIRED	Non-healthy	Crohn's disease	25	Male	13.9844	N/A	N/A	N/A	N/A	N/A	N/A	N/A	N/A	N/A	N/A
He (2017)	Two distinct metacommunities characterize the gut microbiota in Crohn's disease patients	Gigascience	PRJEB15371	SAMEA4431919	Illumina Hiseq 2000	PAIRED	Non-healthy	Crohn's disease	23	Male	16.7488	N/A	N/A	N/A	N/A	N/A	N/A	N/A	N/A	N/A	N/A
He (2017)	Two distinct metacommunities characterize the gut microbiota in Crohn's disease patients	Gigascience	PRJEB15371	SAMEA4431921	Illumina Hiseq 2000	PAIRED	Non-healthy	Crohn's disease	24	Male	16.456	N/A	N/A	N/A	N/A	N/A	N/A	N/A	N/A	N/A	N/A
He (2017)	Two distinct metacommunities characterize the gut microbiota in Crohn's disease patients	Gigascience	PRJEB15371	SAMEA4431926	Illumina Hiseq 2000	PAIRED	Non-healthy	Crohn's disease	23	Female	15.7778	N/A	N/A	N/A	N/A	N/A	N/A	N/A	N/A	N/A	N/A
He (2017)	Two distinct metacommunities characterize the gut microbiota in Crohn's disease patients	Gigascience	PRJEB15371	SAMEA4431928	Illumina Hiseq 2000	PAIRED	Non-healthy	Crohn's disease	36	Female	18.2726	N/A	N/A	N/A	N/A	N/A	N/A	N/A	N/A	N/A	N/A
He (2017)	Two distinct metacommunities characterize the gut microbiota in Crohn's disease patients	Gigascience	PRJEB15371	SAMEA4431929	Illumina Hiseq 2000	PAIRED	Non-healthy	Crohn's disease	22	Male	19.3959	N/A	N/A	N/A	N/A	N/A	N/A	N/A	N/A	N/A	N/A
He (2017)	Two distinct metacommunities characterize the gut microbiota in Crohn's disease patients	Gigascience	PRJEB15371	SAMEA4431931	Illumina Hiseq 2000	PAIRED	Non-healthy	Crohn's disease	31	Male	21.0498	N/A	N/A	N/A	N/A	N/A	N/A	N/A	N/A	N/A	N/A
He (2017)	Two distinct metacommunities characterize the gut microbiota in Crohn's disease patients	Gigascience	PRJEB15371	SAMEA4431933	Illumina Hiseq 2000	PAIRED	Non-healthy	Crohn's disease	21	Female	15.264	N/A	N/A	N/A	N/A	N/A	N/A	N/A	N/A	N/A	N/A
Rampeli (2015)	Metagenome Sequencing of the Hadza Hunter-Gatherer Gut Microbiota	Current Biology	PRJNA278393	SAMN03418252	Illumina Genome Analyzer IIx	PAIRED	Healthy	Healthy	43	Female	N/A	N/A	N/A	N/A	N/A	N/A	N/A	N/A	N/A	Yes	N/A
Rampeli (2015)	Metagenome Sequencing of the Hadza Hunter-Gatherer Gut Microbiota	Current Biology	PRJNA278393	SAMN03418256	Illumina Genome Analyzer IIx	PAIRED	Healthy	Healthy	34	Male	N/A	N/A	N/A	N/A	N/A	N/A	N/A	N/A	N/A	Yes	N/A
Rampeli (2015)	Metagenome Sequencing of the Hadza Hunter-Gatherer Gut Microbiota	Current Biology	PRJNA278393	SAMN03418258	Illumina Genome Analyzer IIx	PAIRED	Healthy	Healthy	30	Male	N/A	N/A	N/A	N/A	N/A	N/A	N/A	N/A	N/A	Yes	N/A
Rampeli (2015)	Metagenome Sequencing of the Hadza Hunter-Gatherer Gut Microbiota	Current Biology	PRJNA278393	SAMN03418257	Illumina Genome Analyzer IIx	PAIRED	Healthy	Healthy	16	Male	N/A	N/A	N/A	N/A	N/A	N/A	N/A	N/A	N/A	Yes	N/A
Rampeli (2015)	Metagenome Sequencing of the Hadza Hunter-Gatherer Gut Microbiota	Current Biology	PRJNA278393	SAMN03418259	Illumina Genome Analyzer IIx	PAIRED	Healthy	Healthy	21	Male	N/A	N/A	N/A	N/A	N/A	N/A	N/A	N/A	N/A	Yes	N/A
Rampeli (2015)	Metagenome Sequencing of the Hadza Hunter-Gatherer Gut Microbiota	Current Biology	PRJNA278393	SAMN03418260	Illumina Genome Analyzer IIx	PAIRED	Healthy	Healthy	23	Male	N/A	N/A	N/A	N/A	N/A	N/A	N/A	N/A	N/A	Yes	N/A
Rampeli (2015)	Metagenome Sequencing of the Hadza Hunter-Gatherer Gut Microbiota	Current Biology	PRJNA278393	SAMN03418261	Illumina Genome Analyzer IIx	PAIRED	Healthy	Healthy	17	Male	N/A	N/A	N/A	N/A	N/A	N/A	N/A	N/A	N/A	Yes	N/A
Rampeli (2015)	Metagenome Sequencing of the Hadza Hunter-Gatherer Gut Microbiota	Current Biology	PRJNA278393	SAMN03418264	Illumina Genome Analyzer IIx	PAIRED	Healthy	Healthy	13	Male	N/A	N/A	N/A	N/A	N/A	N/A	N/A	N/A	N/A	Yes	N/A
Rampeli (2015)	Metagenome Sequencing of the Hadza Hunter-Gatherer Gut Microbiota	Current Biology	PRJNA278393	SAMN03418265	Illumina Genome Analyzer IIx	PAIRED	Healthy	Healthy	43	Male	N/A	N/A	N/A	N/A	N/A	N/A	N/A	N/A	N/A	Yes	N/A
Rampeli (2015)	Metagenome Sequencing of the Hadza Hunter-Gatherer Gut Microbiota	Current Biology	PRJNA278393	SAMN03418266	Illumina Genome Analyzer IIx	PAIRED	Healthy	Healthy	38	Male	N/A	N/A	N/A	N/A	N/A	N/A	N/A	N/A	N/A	Yes	N/A
Rampeli (2015)	Metagenome Sequencing of the Hadza Hunter-Gatherer Gut Microbiota	Current Biology	PRJNA278393	SAMN03418267	Illumina Genome Analyzer IIx	PAIRED	Healthy	Healthy	24	Male	N/A	N/A	N/A	N/A	N/A	N/A	N/A	N/A	N/A	Yes	N/A
Rampeli (2015)	Metagenome Sequencing of the Hadza Hunter-Gatherer Gut Microbiota	Current Biology	PRJNA278393	SAMN03418268	Illumina Genome Analyzer IIx	PAIRED	Healthy	Healthy	65	Male	N/A	N/A	N/A	N/A	N/A	N/A	N/A	N/A	N/A	Yes	N/A
Rampeli (2015)	Metagenome Sequencing of the Hadza Hunter-Gatherer Gut Microbiota	Current Biology	PRJNA278393	SAMN03418269	Illumina Genome Analyzer IIx	PAIRED	Healthy	Healthy	40	Male	N/A	N/A	N/A	N/A	N/A	N/A	N/A	N/A	N/A	Yes	N/A
Rampeli (2015)	Metagenome Sequencing of the Hadza Hunter-Gatherer Gut Microbiota	Current Biology	PRJNA278393	SAMN03418270	Illumina Genome Analyzer IIx	PAIRED	Healthy	Healthy	48	Male	N/A	N/A	N/A	N/A	N/A	N/A	N/A	N/A	N/A	Yes	N/A
Rampeli (2015)	Metagenome Sequencing of the Hadza Hunter-Gatherer Gut Microbiota	Current Biology	PRJNA278393	SAMN03418271	Illumina Genome Analyzer IIx	PAIRED	Healthy	Healthy	29	Female	N/A	N/A	N/A	N/A	N/A	N/A	N/A	N/A	N/A	Yes	N/A
Rampeli (2015)	Metagenome Sequencing of the Hadza Hunter-Gatherer Gut Microbiota	Current Biology	PRJNA278393	SAMN03418272	Illumina Genome Analyzer IIx	PAIRED	Healthy	Healthy	22	Male	N/A	N/A	N/A	N/A	N/A	N/A	N/A	N/A	N/A	Yes	N/A
Rampeli (2015)	Metagenome Sequencing of the Hadza Hunter-Gatherer Gut Microbiota	Current Biology	PRJNA278393	SAMN03418273	Illumina Genome Analyzer IIx	PAIRED	Healthy	Healthy	24	Male	N/A	N/A	N/A	N/A	N/A	N/A	N/A	N/A	N/A	Yes	N/A
Rampeli (2015)	Metagenome Sequencing of the Hadza Hunter-Gatherer Gut Microbiota	Current Biology	PRJNA278393	SAMN03418275	Illumina Genome Analyzer IIx	PAIRED	Healthy	Healthy	30	Male	N/A	N/A	N/A	N/A	N/A	N/A	N/A	N/A	N/A	Yes	N/A
Rampeli (2015)	Metagenome Sequencing of the Hadza Hunter-Gatherer Gut Microbiota	Current Biology	PRJNA278393	SAMN03418277	Illumina Genome Analyzer IIx	PAIRED	Healthy	Healthy	20	Female	N/A	N/A	N/A	N/A	N/A	N/A	N/A	N/A	N/A	Yes	N/A
Rampeli (2015)	Metagenome Sequencing of the Hadza Hunter-Gatherer Gut Microbiota	Current Biology	PRJNA278393	SAMN03418278	Illumina Genome Analyzer IIx	PAIRED	Healthy	Healthy	47	Female	N/A	N/A	N/A	N/A	N/A	N/A	N/A	N/A	N/A	Yes	N/A
Rampeli (2015)	Metagenome Sequencing of the Hadza Hunter-Gatherer Gut Microbiota	Current Biology	PRJNA278393	SAMN03418279	Illumina Genome Analyzer IIx	PAIRED	Healthy	Healthy	38	Male	N/A	N/A	N/A	N/A	N/A	N/A	N/A	N/A	Yes	Yes	N/A
Rampeli (2015)	Metagenome Sequencing of the Hadza Hunter-Gatherer Gut Microbiota	Current Biology	PRJNA278393	SAMN03418280	Illumina Genome Analyzer IIx	PAIRED	Healthy	Healthy	40	Female	N/A	N/A	N/A	N/A	N/A	N/A	N/A	N/A	Yes	Yes	N/A
Rampeli (2015)	Metagenome Sequencing of the Hadza Hunter-Gatherer Gut Microbiota	Current Biology	PRJNA278393	SAMN03418281	Illumina Genome Analyzer IIx	PAIRED	Healthy	Healthy	30	Female	N/A	N/A	N/A	N/A	N/A	N/A	N/A	N/A	Yes	Yes	N/A
Rampeli (2015)	Metagenome Sequencing of the Hadza Hunter-Gatherer Gut Microbiota	Current Biology	PRJNA278393	SAMN03418283	Illumina Genome Analyzer IIx	PAIRED	Healthy	Healthy	34	Female	N/A	N/A	N/A	N/A	N/A	N/A	N/A	N/A	Yes	Yes	N/A
Rampeli (2015)	Metagenome Sequencing of the Hadza Hunter-Gatherer Gut Microbiota	Current Biology	PRJNA278393	SAMN03418284	Illumina Genome Analyzer IIx	PAIRED	Healthy	Healthy	29	Female	N/A	N/A	N/A	N/A	N/A	N/A	N/A	N/A	Yes	Yes	N/A
Rampeli (2015)	Metagenome Sequencing of the Hadza Hunter-Gatherer Gut Microbiota	Current Biology	PRJNA278393	SAMN03418285	Illumina Genome Analyzer IIx	PAIRED	Healthy	Healthy	27	Male	N/A	N/A	N/A	N/A	N/A	N/A	N/A	N/A	Yes	Yes	N/A
Rampeli (2015)	Metagenome Sequencing of the Hadza Hunter-Gatherer Gut Microbiota	Current Biology	PRJNA278393	SAMN03418286	Illumina Genome Analyzer IIx	PAIRED	Healthy	Healthy	30	Male	N/A	N/A	N/A	N/A	N/A	N/A	N/A	N/A	Yes	Yes	N/A
Rampeli (2015)	Metagenome Sequencing of the Hadza Hunter-Gatherer Gut Microbiota	Current Biology	PRJNA278393	SAMN03418287	Illumina Genome Analyzer IIx	PAIRED	Healthy	Healthy	32	Female	N/A	N/A	N/A	N/A	N/A	N/A	N/A	N/A	Yes	Yes	N/A
Rampeli (2015)	Metagenome Sequencing of the Hadza Hunter-Gatherer Gut Microbiota	Current Biology	PRJNA278393	SAMN03418288	Illumina Genome Analyzer IIx	PAIRED	Healthy	Healthy	25	Female	N/A	N/A	N/A	N/A	N/A	N/A	N/A	N/A	Yes	Yes	N/A
Rampeli (2015)	Metagenome Sequencing of the Hadza Hunter-Gatherer Gut Microbiota	Current Biology	PRJNA278393	SAMN03418289	Illumina Genome Analyzer IIx	PAIRED	Healthy	Healthy	34	Male	N/A	N/A	N/A	N/A	N/A	N/A	N/A	N/A	Yes	Yes	N/A
Jie (2017)	The gut microbiome in atherosclerotic cardiovascular disease	Nature Communications	PRJEB21528	SAMEA104142374	Illumina HiSeq 2000	PAIRED	Healthy	Healthy	52	Male	23.88	8.97	N/A	N/A	N/A	N/A	N/A	N/A	N/A	N/A	N/A
Jie (2017)	The gut microbiome in atherosclerotic cardiovascular disease	Nature Communications	PRJEB21528	SAMEA104142373	Illumina HiSeq 2000	PAIRED	Healthy	Healthy	53	Male	24.61	4.46	1.88	2.89	4.58	0.97	N/A	Yes	N/A	N/A	N/A
Jie (2017)	The gut microbiome in atherosclerotic cardiovascular disease	Nature Communications	PRJEB21528	SAMEA104142371	Illumina HiSeq 2000	PAIRED	Healthy	Healthy	53	Female	23.03	5.19	2.2	0.72	4.67	1.23	N/A	N/A	N/A	N/A	N/A
Jie (2017)	The gut microbiome in atherosclerotic cardiovascular disease	Nature Communications	PRJEB21528	SAMEA104142369	Illumina HiSeq 2000	PAIRED	Healthy	Healthy	60	Male	22.34	5.99	2.88	3.68	5.74	0.94	N/A	Yes	N/A	N/A	N/A
Jie (2017)	The gut microbiome in atherosclerotic cardiovascular disease	Nature Communications	PRJEB21528	SAMEA104142368	Illumina HiSeq 2000	PAIRED	Healthy	Healthy	69	Male	20.76	5.66	0.93	3.22	5.25	1.28	N/A	N/A	N/A	N/A	N/A
Jie (2017)	The gut microbiome in atherosclerotic cardiovascular disease	Nature Communications	PRJEB21528	SAMEA104142366	Illumina HiSeq 2000	PAIRED	Healthy	Healthy	44	Female	24.97	4.79	0.97	2.87	4.21	0.89	N/A	N/A	N/A	N/A	N/A
Jie (2017)	The gut microbiome in atherosclerotic cardiovascular disease	Nature Communications	PRJEB21528	SAMEA104142365	Illumina HiSeq 2000	PAIRED	Healthy	Healthy	56	Female	19.23	4.34	0.42	2.36	4.32	1.45	N/A	N/A	N/A	N/A	N/A
Jie (2017)	The gut microbiome in atherosclerotic cardiovascular disease	Nature Communications	PRJEB21528	SAMEA104142364	Illumina HiSeq 2000	PAIRED	Healthy	Healthy	54	Female	19.48	5.69	0.59	3.39	5.75	1.45	N/A	no	N/A	N/A	N/A
Jie (2017)	The gut microbiome in atherosclerotic cardiovascular disease	Nature Communications	PRJEB21528	SAMEA104142361	Illumina HiSeq 2000	PAIRED	Healthy	Healthy	50	Female	21.08	4.23	0.45	2.25	4.95	2	N/A	no	N/A	N/A	N/A
Jie (2017)	The gut microbiome in atherosclerotic cardiovascular disease	Nature Communications	PRJEB21528	SAMEA104142358	Illumina HiSeq 2000	PAIRED	Healthy	Healthy	55	Female	21.56	9.13	1.2	3.14	5.2	1.19	N/A	N/A	N/A	N/A	N/A
Jie (2017)	The gut microbiome in atherosclerotic cardiovascular disease	Nature Communications	PRJEB21528	SAMEA104142355	Illumina HiSeq 2000	PAIRED	Healthy	Healthy	67	Male	24.02	5.29	1.02	3.03	4.67	1.1	N/A	Yes	N/A	N/A	N/A
Jie (2017)	The gut microbiome in atherosclerotic cardiovascular disease	Nature Communications	PRJEB21528	SAMEA104142354	Illumina HiSeq 2000	PAIRED	Healthy	Healthy	38	Male	22.68	4.11	0.88	2.27	3.87	0.98	N/A	N/A	N/A	N/A	N/A
Jie (2017)	The gut microbiome in atherosclerotic cardiovascular disease	Nature Communications	PRJEB21528	SAMEA104142353	Illumina HiSeq 2000	PAIRED	Healthy	Healthy	45	Female	21.08	6.54	0.55	2.52	4.49	1.63	N/A	N/A	N/A	N/A	N/A
Jie (2017)	The gut microbiome in atherosclerotic cardiovascular disease	Nature Communications	PRJEB21528	SAMEA104142352	Illumina HiSeq 2000	PAIRED	Healthy	Healthy	56	Male	23.88	4.73	0.79	3.93	5.47	1.31	N/A	N/A	N/A	N/A	N/A
Jie (2017)	The gut microbiome in atherosclerotic cardiovascular disease	Nature Communications	PRJEB21528	SAMEA104142349	Illumina HiSeq 2000	PAIRED	Healthy	Healthy	55	Male	21.55	6.73	0.94	3.89	5.6	1.2	N/A	N/A	N/A	N/A	N/A
Jie (2017)	The gut microbiome in atherosclerotic cardiovascular disease	Nature Communications	PRJEB21528	SAMEA104142348	Illumina HiSeq 2000	PAIRED	Healthy	Healthy	52	Female	23.81	5.47	0.9	2.89	4.7	1.6	N/A	N/A	N/A	N/A	N/A
Jie (2017)	The gut microbiome in atherosclerotic cardiovascular disease	Nature Communications	PRJEB21528	SAMEA104142347	Illumina HiSeq 2000	PAIRED	Healthy	Healthy	47	Male	24.68	4.54	2.81	2.07	4.6	1.12	N/A	N/A	N/A	N/A	N/A
Jie (2017)	The gut microbiome in atherosclerotic cardiovascular disease	Nature Communications	PRJEB21528	SAMEA104142345	Illumina HiSeq 2000	PAIRED	Healthy	Healthy	50	Male	24.22	5.45	0.87	3.07	4.92	1.11	N/A	N/A	N/A	N/A	N/A
Jie (2017)	The gut microbiome in atherosclerotic cardiovascular disease	Nature Communications	PRJEB21528	SAMEA104142343	Illumina HiSeq 2000	PAIRED	Healthy	Healthy	58	Female	22.06	4.95	0.73	1.89	4.09	1.46	N/A	N/A	N/A	N/A	N/A
Jie (2017)	The gut microbiome in atherosclerotic cardiovascular disease	Nature Communications	PRJEB21528	SAMEA104142342	Illumina HiSeq 2000	PAIRED	Healthy	Healthy	70	Male	24.46	5.95	0.58	3.29	4.77	N/A	N/A	N/A	N/A	N/A	N/A
Jie (2017)	The gut microbiome in atherosclerotic cardiovascular disease	Nature Communications	PRJEB21528	SAMEA104142340	Illumina HiSeq 2000	PAIRED	Healthy	Healthy	60	Female	20.2	4.82	1.47	2.76	5.04	1.36	N/A	N/A	N/A	N/A	N/A
Jie (2017)	The gut microbiome in atherosclerotic cardiovascular disease	Nature Communications	PRJEB21528	SAMEA104142325	Illumina HiSeq 2000	PAIRED	Healthy	Healthy	40	Male	20.02	4.63	1.27	2.63	4.78	1.33	N/A	Yes	N/A	N/A	N/A
Jie (2017)	The gut microbiome in atherosclerotic cardiovascular disease	Nature Communications	PRJEB21528	SAMEA104142326	Illumina HiSeq 2000	PAIRED	Healthy	Healthy	60	Female	21.33	4.52	2.68	4.25	7.15	1.11	N/A	N/A	N/A	N/A	N/A
Jie (2017)	The gut microbiome in atherosclerotic cardiovascular disease	Nature Communications	PRJEB21528	SAMEA104142331	Illumina HiSeq 2000	PAIRED	Healthy	Healthy	52	Female	24.84	6	1.36	2.96	4.9	0.84	N/A	N/A	N/A	N/A	N/A
Jie (2017)	The gut microbiome in atherosclerotic cardiovascular disease	Nature Communications	PRJEB21528	SAMEA104142337	Illumina HiSeq 2000	PAIRED	Healthy	Healthy	56	Female	20.81	5.06	0.45	3.26	5.88	1.92	N/A	N/A	N/A	N/A	N/A
Jie (2017)	The gut microbiome in atherosclerotic cardiovascular disease	Nature Communications	PRJEB21528	SAMEA104142339	Illumina HiSeq 2000	PAIRED	Healthy	Healthy	59	Male	20.45	4.26	1.11	4.12	6.13	1.28	N/A	Yes	N/A	N/A	N/A
Jie (2017)	The gut microbiome in atherosclerotic cardiovascular disease	Nature Communications	PRJEB21528	SAMEA104142328	Illumina HiSeq 2000	PAIRED	Healthy	Healthy	57	Male	24.62	5.19	3.36	3.86	7.01	1.22	N/A	no	N/A	N/A	N/A
Jie (2017)	The gut microbiome in atherosclerotic cardiovascular disease	Nature Communications	PRJEB21528	SAMEA104142333	Illumina HiSeq 2000	PAIRED	Healthy	Healthy	62	Male	23.43	5.22	1.73	1.71	3.62	0.68	N/A	N/A	N/A	N/A	N/A
Jie (2017)	The gut microbiome in atherosclerotic cardiovascular disease	Nature Communications	PRJEB21528	SAMEA104142334	Illumina HiSeq 2000	PAIRED	Healthy	Healthy	55	Male	23.36	4.82	1.29	3.36	5.56	1.71	N/A	N/A	N/A	N/A	N/A
Jie (2017)	The gut microbiome in atherosclerotic cardiovascular disease	Nature Communications	PRJEB21528	SAMEA104142222	Illumina HiSeq 2000	PAIRED	Healthy	Healthy	74	Male	21.72	N/A	N/A	N/A	N/A	N/A	N/A	Yes	N/A	N/A	N/A
Jie (2017)	The gut microbiome in atherosclerotic cardiovascular disease	Nature Communications	PRJEB21528	SAMEA104142235	Illumina HiSeq 2000	PAIRED	Healthy	Healthy	72	Female	21.08	N/A	N/A	N/A	N/A	N/A	N/A	no	N/A	N/A	N/A
Jie (2017)	The gut microbiome in atherosclerotic cardiovascular disease	Nature Communications	PRJEB21528	SAMEA104142232	Illumina HiSeq 2000	PAIRED	Healthy	Healthy	84	Male	21.48	N/A	1.04	3.62	5.81	1.38	N/A	Yes	N/A	N/A	N/A
Jie (2017)	The gut microbiome in atherosclerotic cardiovascular disease	Nature Communications	PRJEB21528	SAMEA104142231	Illumina HiSeq 2000	PAIRED	Healthy	Healthy	74	Female	22.86	N/A	0.52	2.36	4.87	1.54	N/A	no	N/A	N/A	N/A
Jie (2017)	The gut microbiome in atherosclerotic cardiovascular disease	Nature Communications	PRJEB21528	SAMEA104142229	Illumina HiSeq 2000	PAIRED	Healthy	Healthy	65	Female	19.56	N/A	2.57	4.36	7.81	1.1	N/A	no	N/A	N/A	N/A
Jie (2017)	The gut microbiome in atherosclerotic cardiovascular disease	Nature Communications	PRJEB21528	SAMEA104142228	Illumina HiSeq 2000	PAIRED	Healthy	Healthy	67	Male	23.88	N/A	2.24	2.85	5.41	1.07	N/A	no	N/A	N/A	N/A
Jie (2017)	The gut microbiome in atherosclerotic cardiovascular disease	Nature Communications	PRJEB21528	SAMEA104142223	Illumina HiSeq 2000	PAIRED	Healthy	Healthy	68	Male	24.01	N/A	6.27	1.38	4.86	0.83	N/A	no	N/A	N/A	N/A
Jie (2017)	The gut microbiome in atherosclerotic cardiovascular disease	Nature Communications	PRJEB21528	SAMEA104142221	Illumina HiSeq 2000	PAIRED	Healthy	Healthy	71	Male	21.88	N/A	N/A	N/A	N/A	N/A	N/A	no	N/A	N/A	N/A
Jie (2017)	The gut microbiome in atherosclerotic cardiovascular disease	Nature Communications	PRJEB21528	SAMEA104142217	Illumina HiSeq 2000	PAIRED	Healthy	Healthy	74	Male	23.88	N/A	1.76	4.99	7.07	1.09	N/A	Yes	N/A	N/A	N/A
Jie (2017)	The gut microbiome in atherosclerotic cardiovascular disease	Nature Communications	PRJEB21528	SAMEA104142215	Illumina HiSeq 2000	PAIRED	Healthy	Healthy	65	Female	24.97	N/A	1.48	4.88	7.21	1.18	N/A	no	N/A	N/A	N/A
Jie (2017)	The gut microbiome in atherosclerotic cardiovascular disease	Nature Communications	PRJEB21528	SAMEA104142213	Illumina HiSeq 2000	PAIRED	Healthy	Healthy	70	Female	19.56	N/A	1.83	3.56	6.55	1.38	N/A	no	N/A	N/A	N/A
Jie (2017)	The gut microbiome in atherosclerotic cardiovascular disease	Nature Communications	PRJEB21528	SAMEA104142219	Illumina HiSeq 2000	PAIRED	Healthy	Healthy	66	Female	24.12	N/A	5.11	1.34	4.37	0.8	N/A	no	N/A	N/A	N/A
Jie (2017)	The gut microbiome in atherosclerotic cardiovascular disease	Nature Communications	PRJEB21528	SAMEA104142211	Illumina HiSeq 2000	PAIRED	Healthy	Healthy	79	Male	20	N/A	N/A	N/A	N/A	N/A	N/A	no	N/A	N/A	N/A
Jie (2017)	The gut microbiome in atherosclerotic cardiovascular disease	Nature Communications	PRJEB21528	SAMEA104142210	Illumina HiSeq 2000	PAIRED	Healthy	Healthy	69	Female	20.7	N/A	0.75	2.43	4.46	1.3	N/A	no	N/A	N/A	N/A
Jie (2017)	The gut microbiome in atherosclerotic cardiovascular disease	Nature Communications	PRJEB21528	SAMEA104142078	Illumina HiSeq 2000	PAIRED	Healthy	Healthy	107	Male	23.03	N/A	N/A	N/A	N/A	N/A	N/A	N/A	N/A	N/A	N/A
Jie (2017)	The gut microbiome in atherosclerotic cardiovascular disease	Nature Communications	PRJEB21528	SAMEA104142153	Illumina HiSeq 2000	PAIRED	Healthy	Healthy	63	Female	20.96	N/A	0.96	2.93	5.79	1.67	N/A	N/A	N/A	N/A	N/A
Jie (2017)	The gut microbiome in atherosclerotic cardiovascular disease	Nature Communications	PRJEB21528	SAMEA104142150	Illumina HiSeq 2000	PAIRED	Healthy	Healthy	65	Male	24.39	N/A	1.81	3.41	5.63	0.89	N/A	N/A	N/A	N/A	N/A
Jie (2017)	The gut microbiome in atherosclerotic cardiovascular disease	Nature Communications	PRJEB21528	SAMEA104142148	Illumina HiSeq 2000	PAIRED	Healthy	Healthy	N/A	Female	18.83	N/A	N/A	N/A	N/A	N/A	N/A	N/A	N/A	N/A	N/A
Jie (2017)	The gut microbiome in atherosclerotic cardiovascular disease	Nature Communications	PRJEB21528	SAMEA104142145	Illumina HiSeq 2000	PAIRED	Healthy	Healthy	56	Female	22.04	N/A	0.93	2.09	3.87	1.31	N/A	N/A	N/A	N/A	N/A
Jie (2017)	The gut microbiome in atherosclerotic cardiovascular disease	Nature Communications	PRJEB21528	SAMEA104142144	Illumina HiSeq 2000	PAIRED	Healthy	Healthy	58	Male	23.99	N/A	3.49	4.04	7.06	1.16	N/A	N/A	N/A	N/A	N/A
Jie (2017)	The gut microbiome in atherosclerotic cardiovascular disease	Nature Communications	PRJEB21528	SAMEA104142142	Illumina HiSeq 2000	PAIRED	Healthy	Healthy	56	Female	19.48	N/A	0.9	2.93	5.85	2.31	N/A	N/A	N/A	N/A	N/A
Jie (2017)	The gut microbiome in atherosclerotic cardiovascular disease	Nature Communications	PRJEB21528	SAMEA104142141	Illumina HiSeq 2000	PAIRED	Healthy	Healthy	66	Male	22.5	N/A	1.96	1.47	3.13	0.79	N/A	N/A	N/A	N/A	N/A
Jie (2017)	The gut microbiome in atherosclerotic cardiovascular disease	Nature Communications	PRJEB21528	SAMEA104142140	Illumina HiSeq 2000	PAIRED	Healthy	Healthy	66	Male	20.8	N/A	1.32	2.47	3.99	0.89	N/A	N/A	N/A	N/A	N/A
Jie (2017)	The gut microbiome in atherosclerotic cardiovascular disease	Nature Communications	PRJEB21528	SAMEA104142139	Illumina HiSeq 2000	PAIRED	Healthy	Healthy	57	Female	23.65	N/A	1.11	2.61	4.94	1.91	N/A	N/A	N/A	N/A	N/A
Jie (2017)	The gut microbiome in atherosclerotic cardiovascular disease	Nature Communications	PRJEB21528	SAMEA104142137	Illumina HiSeq 2000	PAIRED	Healthy	Healthy	57	Female	21.1	N/A	0.79	4.25	5.9	1.3	N/A	N/A	N/A	N/A	N/A
Jie (2017)	The gut microbiome in atherosclerotic cardiovascular disease	Nature Communications	PRJEB21528	SAMEA104142134	Illumina HiSeq 2000	PAIRED	Healthy	Healthy	69	Male	22.76	N/A	0.92	2.6	4.26	1.17	N/A	N/A	N/A	N/A	N/A
Jie (2017)	The gut microbiome in atherosclerotic cardiovascular disease	Nature Communications	PRJEB21528	SAMEA104142133	Illumina HiSeq 2000	PAIRED	Healthy	Healthy	68	Female	22.15	N/A	0.8	2.96	5.01	1.53	N/A	N/A	N/A	N/A	N/A
Jie (2017)	The gut microbiome in atherosclerotic cardiovascular disease	Nature Communications	PRJEB21528	SAMEA104142132	Illumina HiSeq 2000	PAIRED	Healthy	Healthy	63	Female	20	N/A	1.47	5.62	7.73	1.37	N/A	N/A	N/A	N/A	N/A
Jie (2017)	The gut microbiome in atherosclerotic cardiovascular disease	Nature Communications	PRJEB21528	SAMEA104142131	Illumina HiSeq 2000	PAIRED	Healthy	Healthy	62	Male	22.41	N/A	0.77	2.49	4.07	1.17	N/A	N/A	N/A	N/A	N/A
Jie (2017)	The gut microbiome in atherosclerotic cardiovascular disease	Nature Communications	PRJEB21528	SAMEA104142129	Illumina HiSeq 2000	PAIRED	Healthy	Healthy	61	Female	23.42	N/A	1.5	3.57	5.35	1.19	N/A	N/A	N/A	N/A	N/A
Jie (2017)	The gut microbiome in atherosclerotic cardiovascular disease	Nature Communications	PRJEB21528	SAMEA104142125	Illumina HiSeq 2000	PAIRED	Healthy	Healthy	55	Female	22.68	N/A	1.28	3.24	5.69	1.51	N/A	N/A	N/A	N/A	N/A
Jie (2017)	The gut microbiome in atherosclerotic cardiovascular disease	Nature Communications	PRJEB21528	SAMEA104142124	Illumina HiSeq 2000	PAIRED	Healthy	Healthy	56	Female	21.26	N/A	1.31	2.56	5.07	1.78	N/A	N/A	N/A	N/A	N/A
Jie (2017)	The gut microbiome in atherosclerotic cardiovascular disease	Nature Communications	PRJEB21528	SAMEA104142076	Illumina HiSeq 2000	PAIRED	Healthy	Healthy	62	Male	24.8	N/A	0.45	3.94	5.49	1.13	N/A	N/A	N/A	N/A	N/A
Jie (2017)	The gut microbiome in atherosclerotic cardiovascular disease	Nature Communications	PRJEB21528	SAMEA104142119	Illumina HiSeq 2000	PAIRED	Healthy	Healthy	62	Female	21.08	N/A	1.61	4.31	7	1.23	N/A	N/A	N/A	N/A	N/A
Jie (2017)	The gut microbiome in atherosclerotic cardiovascular disease	Nature Communications	PRJEB21528	SAMEA104142117	Illumina HiSeq 2000	PAIRED	Healthy	Healthy	61	Male	21.48	N/A	0.84	4.32	6.55	1.29	N/A	N/A	N/A	N/A	N/A
Jie (2017)	The gut microbiome in atherosclerotic cardiovascular disease	Nature Communications	PRJEB21528	SAMEA104142115	Illumina HiSeq 2000	PAIRED	Healthy	Healthy	63	Male	21.01	N/A	0.37	4.07	5.6	1.11	N/A	N/A	N/A	N/A	N/A
Jie (2017)	The gut microbiome in atherosclerotic cardiovascular disease	Nature Communications	PRJEB21528	SAMEA104142111	Illumina HiSeq 2000	PAIRED	Healthy	Healthy	65	Male	18.82	N/A	0.87	3.28	6.11	1.83	N/A	N/A	N/A	N/A	N/A
Jie (2017)	The gut microbiome in atherosclerotic cardiovascular disease	Nature Communications	PRJEB21528	SAMEA104142102	Illumina HiSeq 2000	PAIRED	Healthy	Healthy	56	Female	20	N/A	1.36	3.9	6.36	1.51	N/A	N/A	N/A	N/A	N/A
Jie (2017)	The gut microbiome in atherosclerotic cardiovascular disease	Nature Communications	PRJEB21528	SAMEA104142107	Illumina HiSeq 2000	PAIRED	Healthy	Healthy	58	Female	22.19	N/A	N/A	N/A	N/A	N/A	N/A	N/A	N/A	N/A	N/A
Jie (2017)	The gut microbiome in atherosclerotic cardiovascular disease	Nature Communications	PRJEB21528	SAMEA104142104	Illumina HiSeq 2000	PAIRED	Healthy	Healthy	61	Male	19.36	N/A	1	3.53	5.71	1.48	N/A	N/A	N/A	N/A	N/A
Jie (2017)	The gut microbiome in atherosclerotic cardiovascular disease	Nature Communications	PRJEB21528	SAMEA104142103	Illumina HiSeq 2000	PAIRED	Healthy	Healthy	59	Female	22.41	N/A	0.85	2.92	5.05	1.48	N/A	N/A	N/A	N/A	N/A
Jie (2017)	The gut microbiome in atherosclerotic cardiovascular disease	Nature Communications	PRJEB21528	SAMEA104142099	Illumina HiSeq 2000	PAIRED	Healthy	Healthy	59	Female	20.31	N/A	N/A	N/A	N/A	N/A	N/A	N/A	N/A	N/A	N/A
Jie (2017)	The gut microbiome in atherosclerotic cardiovascular disease	Nature Communications	PRJEB21528	SAMEA104142097	Illumina HiSeq 2000	PAIRED	Healthy	Healthy	62	Female	21.21	N/A	1.48	4.96	7.32	1.23	N/A	N/A	N/A	N/A	N/A
Jie (2017)	The gut microbiome in atherosclerotic cardiovascular disease	Nature Communications	PRJEB21528	SAMEA104142089	Illumina HiSeq 2000	PAIRED	Healthy	Healthy	63	Female	22.21	N/A	N/A	N/A	N/A	N/A	N/A	N/A	N/A	N/A	N/A
Jie (2017)	The gut microbiome in atherosclerotic cardiovascular disease	Nature Communications	PRJEB21528	SAMEA104142088	Illumina HiSeq 2000	PAIRED	Healthy	Healthy	60	Female	21.93	N/A	N/A	N/A	N/A	N/A	N/A	N/A	N/A	N/A	N/A
Jie (2017)	The gut microbiome in atherosclerotic cardiovascular disease	Nature Communications	PRJEB21528	SAMEA104142087	Illumina HiSeq 2000	PAIRED	Healthy	Healthy	62	Male	23.18	N/A	N/A	N/A	N/A	N/A	N/A	N/A	N/A	N/A	N/A
Zeller (2014)	Potential of fecal microbiota for early-stage detection of colorectal cancer	Mol Syst Biol	PRJEB6070	SAMEA2467039	Illumina MiSeq	PAIRED	Healthy	Healthy	72	Female	25	N/A	N/A	N/A	N/A	N/A	N/A	N/A	N/A	N/A	N/A
Zeller (2014)	Potential of fecal microbiota for early-stage detection of colorectal cancer	Mol Syst Biol	PRJEB6070	SAMEA2466965	Illumina MiSeq	PAIRED	Healthy	Healthy	35	Male	23	N/A	N/A	N/A	N/A	N/A	N/A	N/A	N/A	N/A	N/A
Zeller (2014)	Potential of fecal microbiota for early-stage detection of colorectal cancer	Mol Syst Biol	PRJEB6070	SAMEA2466911	Illumina MiSeq	PAIRED	Healthy	Healthy	29	Male	24.49	N/A	N/A	N/A	N/A	N/A	N/A	N/A	N/A	N/A	N/A
Zeller (2014)	Potential of fecal microbiota for early-stage detection of colorectal cancer	Mol Syst Biol	PRJEB6070	SAMEA2467031	Illumina MiSeq	PAIRED	Healthy	Healthy	61	Male	23	N/A	N/A	N/A	N/A	N/A	N/A	N/A	N/A	N/A	N/A
Zeller (2014)	Potential of fecal microbiota for early-stage detection of colorectal cancer	Mol Syst Biol	PRJEB6070	SAMEA2467021	Illumina MiSeq	PAIRED	Healthy	Healthy	65	Female	24	N/A	N/A	N/A	N/A	N/A	N/A	N/A	N/A	N/A	N/A
Zeller (2014)	Potential of fecal microbiota for early-stage detection of colorectal cancer	Mol Syst Biol	PRJEB6070	SAMEA2467028	Illumina MiSeq	PAIRED	Healthy	Healthy	63	Male	N/A	N/A	N/A	N/A	N/A	N/A	N/A	N/A	N/A	N/A	N/A
Zeller (2014)	Potential of fecal microbiota for early-stage detection of colorectal cancer	Mol Syst Biol	PRJEB6070	SAMEA2467036	Illumina MiSeq	PAIRED	Healthy	Healthy	77	Female	22	N/A	N/A	N/A	N/A	N/A	N/A	N/A	N/A	N/A	N/A
Zeller (2014)	Potential of fecal microbiota for early-stage detection of colorectal cancer	Mol Syst Biol	PRJEB6070	SAMEA2467014	Illumina MiSeq	PAIRED	Healthy	Healthy	62	Female	21	N/A	N/A	N/A	N/A	N/A	N/A	N/A	N/A	N/A	N/A
Zeller (2014)	Potential of fecal microbiota for early-stage detection of colorectal cancer	Mol Syst Biol	PRJEB6070	SAMEA2467035	Illumina MiSeq	PAIRED	Healthy	Healthy	67	Male	21	N/A	N/A	N/A	N/A	N/A	N/A	N/A	N/A	N/A	N/A
Zeller (2014)	Potential of fecal microbiota for early-stage detection of colorectal cancer	Mol Syst Biol	PRJEB6070	SAMEA2466912	Illumina MiSeq	PAIRED	Healthy	Healthy	25	Male	24.15	N/A	N/A	N/A	N/A	N/A	N/A	N/A	N/A	N/A	N/A
Zeller (2014)	Potential of fecal microbiota for early-stage detection of colorectal cancer	Mol Syst Biol	PRJEB6070	SAMEA2467010	Illumina MiSeq	PAIRED	Healthy	Healthy	56	Female	N/A	N/A	N/A	N/A	N/A	N/A	N/A	N/A	N/A	N/A	N/A
Zeller (2014)	Potential of fecal microbiota for early-stage detection of colorectal cancer	Mol Syst Biol	PRJEB6070	SAMEA2467011	Illumina MiSeq	PAIRED	Healthy	Healthy	70	Male	22	N/A	N/A	N/A	N/A	N/A	N/A	N/A	N/A	N/A	N/A
Zeller (2014)	Potential of fecal microbiota for early-stage detection of colorectal cancer	Mol Syst Biol	PRJEB6070	SAMEA2467017	Illumina MiSeq	PAIRED	Healthy	Healthy	61	Female	24	N/A	N/A	N/A	N/A	N/A	N/A	N/A	N/A	N/A	N/A
Zeller (2014)	Potential of fecal microbiota for early-stage detection of colorectal cancer	Mol Syst Biol	PRJEB6070	SAMEA2467027	Illumina MiSeq	PAIRED	Healthy	Healthy	71	Female	23	N/A	N/A	N/A	N/A	N/A	N/A	N/A	N/A	N/A	N/A
Zeller (2014)	Potential of fecal microbiota for early-stage detection of colorectal cancer	Mol Syst Biol	PRJEB6070	SAMEA2466903	Illumina MiSeq	PAIRED	Healthy	Healthy	59	Male	25	N/A	N/A	N/A	N/A	N/A	N/A	N/A	N/A	N/A	N/A
Zeller (2014)	Potential of fecal microbiota for early-stage detection of colorectal cancer	Mol Syst Biol	PRJEB6070	SAMEA2467030	Illumina MiSeq	PAIRED	Healthy	Healthy	62	Male	23	N/A	N/A	N/A	N/A	N/A	N/A	N/A	N/A	N/A	N/A
Zeller (2014)	Potential of fecal microbiota for early-stage detection of colorectal cancer	Mol Syst Biol	PRJEB6070	SAMEA2466887	Illumina MiSeq	PAIRED	Healthy	Healthy	52	Female	20	N/A	N/A	N/A	N/A	N/A	N/A	N/A	N/A	N/A	N/A
Zeller (2014)	Potential of fecal microbiota for early-stage detection of colorectal cancer	Mol Syst Biol	PRJEB6070	SAMEA2466900	Illumina MiSeq	PAIRED	Healthy	Healthy	72	Male	24	N/A	N/A	N/A	N/A	N/A	N/A	N/A	N/A	N/A	N/A
Zeller (2014)	Potential of fecal microbiota for early-stage detection of colorectal cancer	Mol Syst Biol	PRJEB6070	SAMEA2466933	Illumina MiSeq	PAIRED	Healthy	Healthy	50	Male	25	N/A	N/A	N/A	N/A	N/A	N/A	N/A	N/A	N/A	N/A
Zeller (2014)	Potential of fecal microbiota for early-stage detection of colorectal cancer	Mol Syst Biol	PRJEB6070	SAMEA2467018	Illumina MiSeq	PAIRED	Healthy	Healthy	68	Female	25	N/A	N/A	N/A	N/A	N/A	N/A	N/A	N/A	N/A	N/A
Zeller (2014)	Potential of fecal microbiota for early-stage detection of colorectal cancer	Mol Syst Biol	PRJEB6070	SAMEA2467024	Illumina MiSeq	PAIRED	Healthy	Healthy	63	Male	25	N/A	N/A	N/A	N/A	N/A	N/A	N/A	N/A	N/A	N/A
Zeller (2014)	Potential of fecal microbiota for early-stage detection of colorectal cancer	Mol Syst Biol	PRJEB6070	SAMEA2467038	Illumina MiSeq	PAIRED	Healthy	Healthy	62	Female	20	N/A	N/A	N/A	N/A	N/A	N/A	N/A	N/A	N/A	N/A
Zeller (2014)	Potential of fecal microbiota for early-stage detection of colorectal cancer	Mol Syst Biol	PRJEB6070	SAMEA2466901	Illumina MiSeq	PAIRED	Healthy	Healthy	55	Female	20	N/A	N/A	N/A	N/A	N/A	N/A	N/A	N/A	N/A	N/A
Zeller (2014)	Potential of fecal microbiota for early-stage detection of colorectal cancer	Mol Syst Biol	PRJEB6070	SAMEA2466979	Illumina MiSeq	PAIRED	Healthy	Healthy	67	Male	25	N/A	N/A	N/A	N/A	N/A	N/A	N/A	N/A	N/A	N/A
Zeller (2014)	Potential of fecal microbiota for early-stage detection of colorectal cancer	Mol Syst Biol	PRJEB6070	SAMEA2467041	Illumina MiSeq	PAIRED	Healthy	Healthy	66	Male	25	N/A	N/A	N/A	N/A	N/A	N/A	N/A	N/A	N/A	N/A
Zeller (2014)	Potential of fecal microbiota for early-stage detection of colorectal cancer	Mol Syst Biol	PRJEB6070	SAMEA2467026	Illumina MiSeq	PAIRED	Healthy	Healthy	61	Female	23	N/A	N/A	N/A	N/A	N/A	N/A	N/A	N/A	N/A	N/A
Zeller (2014)	Potential of fecal microbiota for early-stage detection of colorectal cancer	Mol Syst Biol	PRJEB6070	SAMEA2467034	Illumina MiSeq	PAIRED	Healthy	Healthy	63	Female	22	N/A	N/A	N/A	N/A	N/A	N/A	N/A	N/A	N/A	N/A
Zeller (2014)	Potential of fecal microbiota for early-stage detection of colorectal cancer	Mol Syst Biol	PRJEB6070	SAMEA2467016	Illumina MiSeq	PAIRED	Healthy	Healthy	69	Female	25	N/A	N/A	N/A	N/A	N/A	N/A	N/A	N/A	N/A	N/A
Zeller (2014)	Potential of fecal microbiota for early-stage detection of colorectal cancer	Mol Syst Biol	PRJEB6070	SAMEA2466982	Illumina MiSeq	PAIRED	Healthy	Healthy	49	Female	23	N/A	N/A	N/A	N/A	N/A	N/A	N/A	N/A	N/A	N/A
Zeller (2014)	Potential of fecal microbiota for early-stage detection of colorectal cancer	Mol Syst Biol	PRJEB6070	SAMEA2466913	Illumina MiSeq	PAIRED	Healthy	Healthy	63	Female	23	N/A	N/A	N/A	N/A	N/A	N/A	N/A	N/A	N/A	N/A
Zeller (2014)	Potential of fecal microbiota for early-stage detection of colorectal cancer	Mol Syst Biol	PRJEB6070	SAMEA2466909	Illumina MiSeq	PAIRED	Healthy	Healthy	59	Female	25	N/A	N/A	N/A	N/A	N/A	N/A	N/A	N/A	N/A	N/A
Zeller (2014)	Potential of fecal microbiota for early-stage detection of colorectal cancer	Mol Syst Biol	PRJEB6070	SAMEA2467022	Illumina MiSeq	PAIRED	Healthy	Healthy	70	Male	25	N/A	N/A	N/A	N/A	N/A	N/A	N/A	N/A	N/A	N/A
Zeller (2014)	Potential of fecal microbiota for early-stage detection of colorectal cancer	Mol Syst Biol	PRJEB6070	SAMEA2467020	Illumina MiSeq	PAIRED	Healthy	Healthy	62	Male	24	N/A	N/A	N/A	N/A	N/A	N/A	N/A	N/A	N/A	N/A
Zeller (2014)	Potential of fecal microbiota for early-stage detection of colorectal cancer	Mol Syst Biol	PRJEB6070	SAMEA2466902	Illumina MiSeq	PAIRED	Healthy	Healthy	64	Female	20	N/A	N/A	N/A	N/A	N/A	N/A	N/A	N/A	N/A	N/A
Zeller (2014)	Potential of fecal microbiota for early-stage detection of colorectal cancer	Mol Syst Biol	PRJEB6070	SAMEA2466892	Illumina MiSeq	PAIRED	Healthy	Healthy	57	Male	24	N/A	N/A	N/A	N/A	N/A	N/A	N/A	N/A	N/A	N/A
Zeller (2014)	Potential of fecal microbiota for early-stage detection of colorectal cancer	Mol Syst Biol	PRJEB6070	SAMEA2466985	Illumina MiSeq	PAIRED	Healthy	Healthy	38	Female	22	N/A	N/A	N/A	N/A	N/A	N/A	N/A	N/A	N/A	N/A
Zeller (2014)	Potential of fecal microbiota for early-stage detection of colorectal cancer	Mol Syst Biol	PRJEB6070	SAMEA2467033	Illumina MiSeq	PAIRED	Healthy	Healthy	67	Female	23	N/A	N/A	N/A	N/A	N/A	N/A	N/A	N/A	N/A	N/A
Zeller (2014)	Potential of fecal microbiota for early-stage detection of colorectal cancer	Mol Syst Biol	PRJEB6070	SAMEA2467029	Illumina MiSeq	PAIRED	Healthy	Healthy	84	Male	23	N/A	N/A	N/A	N/A	N/A	N/A	N/A	N/A	N/A	N/A
Zeller (2014)	Potential of fecal microbiota for early-stage detection of colorectal cancer	Mol Syst Biol	PRJEB6070	SAMEA2466898	Illumina MiSeq	PAIRED	Healthy	Healthy	59	Female	25	N/A	N/A	N/A	N/A	N/A	N/A	N/A	N/A	N/A	N/A
Zeller (2014)	Potential of fecal microbiota for early-stage detection of colorectal cancer	Mol Syst Biol	PRJEB6070	SAMEA2467012	Illumina MiSeq	PAIRED	Healthy	Healthy	80	Female	21	N/A	N/A	N/A	N/A	N/A	N/A	N/A	N/A	N/A	N/A
Zeller (2014)	Potential of fecal microbiota for early-stage detection of colorectal cancer	Mol Syst Biol	PRJEB6070	SAMEA2466980	Illumina MiSeq	PAIRED	Healthy	Healthy	52	Male	24	N/A	N/A	N/A	N/A	N/A	N/A	N/A	N/A	N/A	N/A
Zeller (2014)	Potential of fecal microbiota for early-stage detection of colorectal cancer	Mol Syst Biol	PRJEB6070	SAMEA2467019	Illumina MiSeq	PAIRED	Healthy	Healthy	63	Female	21	N/A	N/A	N/A	N/A	N/A	N/A	N/A	N/A	N/A	N/A
Qin (2012)	A metagenome-wide association study of gut microbiota in type 2 diabetes	Nature	PRJNA422434	SAMN00715168	Illumina Genome Analyzer II	PAIRED	Healthy	Healthy	44	Female	19.33	5.31	0.65	3.06	N/A	1.4	N/A	N/A	N/A	N/A	N/A
Qin (2012)	A metagenome-wide association study of gut microbiota in type 2 diabetes	Nature	PRJNA422434	SAMN00715170	Illumina Genome Analyzer II	PAIRED	Healthy	Healthy	39	Female	20.57	5.09	1.31	2.91	N/A	1.07	N/A	N/A	N/A	N/A	N/A
Qin (2012)	A metagenome-wide association study of gut microbiota in type 2 diabetes	Nature	PRJNA422434	SAMN00715171	Illumina Genome Analyzer II	PAIRED	Healthy	Healthy	27	Female	18.99	5.05	1.96	4.14	N/A	1.11	N/A	N/A	N/A	N/A	N/A
Qin (2012)	A metagenome-wide association study of gut microbiota in type 2 diabetes	Nature	PRJNA422434	SAMN00715172	Illumina Genome Analyzer II	PAIRED	Healthy	Healthy	35	Female	20.17	5.41	1.99	2.89	N/A	0.89	N/A	N/A	N/A	N/A	N/A
Qin (2012)	A metagenome-wide association study of gut microbiota in type 2 diabetes	Nature	PRJNA422434	SAMN00715173	Illumina Genome Analyzer II	PAIRED	Healthy	Healthy	25	Female	18.52	5.53	1.17	3.61	N/A	1.38	N/A	N/A	N/A	N/A	N/A
Qin (2012)	A metagenome-wide association study of gut microbiota in type 2 diabetes	Nature	PRJNA422434	SAMN00715175	Illumina Genome Analyzer II	PAIRED	Healthy	Healthy	32	Male	19.14	5.54	0.81	2.41	N/A	1.23	N/A	N/A	N/A	N/A	N/A
Qin (2012)	A metagenome-wide association study of gut microbiota in type 2 diabetes	Nature	PRJNA422434	SAMN00715176	Illumina Genome Analyzer II	PAIRED	Healthy	Healthy	23	Male	19.49	5.7	0.96	2.38	N/A	1.09	N/A	N/A	N/A	N/A	N/A
Qin (2012)	A metagenome-wide association study of gut microbiota in type 2 diabetes	Nature	PRJNA422434	SAMN00715177	Illumina Genome Analyzer II	PAIRED	Healthy	Healthy	42	Male	19.13	5.83	2	3.94	N/A	1.16	N/A	N/A	N/A	N/A	N/A
Qin (2012)	A metagenome-wide association study of gut microbiota in type 2 diabetes	Nature	PRJNA422434	SAMN00715178	Illumina Genome Analyzer II	PAIRED	Healthy	Healthy	22	Male	19.57	5.25	1.24	4.27	N/A	1.47	N/A	N/A	N/A	N/A	N/A
Qin (2012)	A metagenome-wide association study of gut microbiota in type 2 diabetes	Nature	PRJNA422434	SAMN00715181	Illumina Genome Analyzer II	PAIRED	Healthy	Healthy	23	Male	19.47	5.14	1.26	3.64	N/A	1.49	N/A	N/A	N/A	N/A	N/A
Qin (2012)	A metagenome-wide association study of gut microbiota in type 2 diabetes	Nature	PRJNA422434	SAMN00715182	Illumina Genome Analyzer II	PAIRED	Healthy	Healthy	23	Male	19.16	5.8	1.8	3.73	N/A	1.05	N/A	N/A	N/A	N/A	N/A
Qin (2012)	A metagenome-wide association study of gut microbiota in type 2 diabetes	Nature	PRJNA422434	SAMN00715183	Illumina Genome Analyzer II	PAIRED	Healthy	Healthy	38	Male	19.38	5.05	1.49	4.14	N/A	1.16	N/A	N/A	N/A	N/A	N/A
Qin (2012)	A metagenome-wide association study of gut microbiota in type 2 diabetes	Nature	PRJNA422434	SAMN00715189	Illumina Genome Analyzer II	PAIRED	Healthy	Healthy	32	Female	24.89	5.66	1.32	3.07	N/A	1.24	N/A	N/A	N/A	N/A	N/A
Qin (2012)	A metagenome-wide association study of gut microbiota in type 2 diabetes	Nature	PRJNA422434	SAMN00715195	Illumina Genome Analyzer II	PAIRED	Healthy	Healthy	72	Male	23.66	5.62	2	3.33	N/A	0.96	N/A	N/A	N/A	N/A	N/A
Qin (2012)	A metagenome-wide association study of gut microbiota in type 2 diabetes	Nature	PRJNA422434	SAMN00715199	Illumina Genome Analyzer II	PAIRED	Healthy	Healthy	43	Male	25	5.57	1.37	2.7	N/A	1.78	N/A	N/A	N/A	N/A	N/A
Qin (2012)	A metagenome-wide association study of gut microbiota in type 2 diabetes	Nature	PRJNA422434	SAMN00715241	Illumina Genome Analyzer II	PAIRED	Healthy	Healthy	27	Female	19.53	5.51	1.97	4.81	N/A	1.48	N/A	N/A	N/A	N/A	N/A
Qin (2012)	A metagenome-wide association study of gut microbiota in type 2 diabetes	Nature	PRJNA422434	SAMN00715243	Illumina Genome Analyzer II	PAIRED	Healthy	Healthy	59	Female	19.15	4.66	1.44	3.31	N/A	1.02	N/A	N/A	N/A	N/A	N/A
Qin (2012)	A metagenome-wide association study of gut microbiota in type 2 diabetes	Nature	PRJNA422434	SAMN00715245	Illumina Genome Analyzer II	PAIRED	Healthy	Healthy	24	Male	19.35	4.83	2.08	3.99	N/A	1.08	N/A	N/A	N/A	N/A	N/A
Qin (2012)	A metagenome-wide association study of gut microbiota in type 2 diabetes	Nature	PRJNA422434	SAMN00715246	Illumina Genome Analyzer II	PAIRED	Healthy	Healthy	24	Male	19.03	5.61	1.36	3.53	N/A	1.37	N/A	N/A	N/A	N/A	N/A
Qin (2012)	A metagenome-wide association study of gut microbiota in type 2 diabetes	Nature	PRJNA422434	SAMN00715247	Illumina Genome Analyzer II	PAIRED	Healthy	Healthy	22	Male	19.92	5.43	1.47	3.6	N/A	1.15	N/A	N/A	N/A	N/A	N/A
Qin (2012)	A metagenome-wide association study of gut microbiota in type 2 diabetes	Nature	PRJNA422434	SAMN00715248	Illumina Genome Analyzer II	PAIRED	Healthy	Healthy	23	Male	19.96	5.71	1.59	2.81	N/A	0.97	N/A	N/A	N/A	N/A	N/A
Qin (2012)	A metagenome-wide association study of gut microbiota in type 2 diabetes	Nature	PRJNA422434	SAMN00715249	Illumina Genome Analyzer II	PAIRED	Healthy	Healthy	25	Male	18.59	5.08	0.86	2.46	N/A	2.03	N/A	N/A	N/A	N/A	N/A
Qin (2012)	A metagenome-wide association study of gut microbiota in type 2 diabetes	Nature	PRJNA422434	SAMN00715250	Illumina Genome Analyzer II	PAIRED	Healthy	Healthy	29	Male	19.84	4.74	2.35	3.29	N/A	0.99	N/A	N/A	N/A	N/A	N/A
Qin (2012)	A metagenome-wide association study of gut microbiota in type 2 diabetes	Nature	PRJNA422434	SAMN00715252	Illumina Genome Analyzer II	PAIRED	Healthy	Healthy	24	Male	20.66	5.51	2.12	3.91	N/A	0.92	N/A	N/A	N/A	N/A	N/A
Qin (2012)	A metagenome-wide association study of gut microbiota in type 2 diabetes	Nature	PRJNA422434	SAMN00715254	Illumina Genome Analyzer II	PAIRED	Healthy	Healthy	21	Male	19.05	4.91	1.47	4.62	N/A	1.68	N/A	N/A	N/A	N/A	N/A
Qin (2012)	A metagenome-wide association study of gut microbiota in type 2 diabetes	Nature	PRJNA422434	SAMN00715255	Illumina Genome Analyzer II	PAIRED	Healthy	Healthy	25	Male	19.44	4.97	2.65	4.31	N/A	0.82	N/A	N/A	N/A	N/A	N/A
Qin (2012)	A metagenome-wide association study of gut microbiota in type 2 diabetes	Nature	PRJNA422434	SAMN00715256	Illumina Genome Analyzer II	PAIRED	Healthy	Healthy	33	Male	20.31	5.02	2.08	3.5	N/A	1.13	N/A	N/A	N/A	N/A	N/A
Qin (2012)	A metagenome-wide association study of gut microbiota in type 2 diabetes	Nature	PRJNA422434	SAMN00715257	Illumina Genome Analyzer II	PAIRED	Healthy	Healthy	39	Male	19.49	5.4	1.35	2.9	N/A	1.2	N/A	N/A	N/A	N/A	N/A
Qin (2012)	A metagenome-wide association study of gut microbiota in type 2 diabetes	Nature	PRJNA422434	SAMN00715260	Illumina Genome Analyzer II	PAIRED	Healthy	Healthy	40	Female	24.89	5.81	1.36	3.74	N/A	1.28	N/A	N/A	N/A	N/A	N/A
Qin (2012)	A metagenome-wide association study of gut microbiota in type 2 diabetes	Nature	PRJNA422434	SAMN00715269	Illumina Genome Analyzer II	PAIRED	Healthy	Healthy	37	Male	24.77	5.02	0.81	3.26	N/A	1.29	N/A	N/A	N/A	N/A	N/A
Qin (2012)	A metagenome-wide association study of gut microbiota in type 2 diabetes	Nature	PRJNA422434	SAMN00791932	Illumina Genome Analyzer II	PAIRED	Healthy	Healthy	N/A	N/A	N/A	N/A	N/A	N/A	N/A	N/A	N/A	N/A	N/A	N/A	N/A
Qin (2012)	A metagenome-wide association study of gut microbiota in type 2 diabetes	Nature	PRJNA422434	SAMN00791933	Illumina Genome Analyzer II	PAIRED	Healthy	Healthy	N/A	N/A	N/A	N/A	N/A	N/A	N/A	N/A	N/A	N/A	N/A	N/A	N/A
Qin (2012)	A metagenome-wide association study of gut microbiota in type 2 diabetes	Nature	PRJNA422434	SAMN00791940	Illumina Genome Analyzer II	PAIRED	Healthy	Healthy	27	Female	23.92	4.01	0.97	3.02	N/A	1.51	N/A	N/A	N/A	N/A	N/A
Qin (2012)	A metagenome-wide association study of gut microbiota in type 2 diabetes	Nature	PRJNA422434	SAMN00791944	Illumina Genome Analyzer II	PAIRED	Healthy	Healthy	27	Female	18.75	4.5	0.88	2.21	N/A	1.7	N/A	N/A	N/A	N/A	N/A
Qin (2012)	A metagenome-wide association study of gut microbiota in type 2 diabetes	Nature	PRJNA422434	SAMN00791945	Illumina Genome Analyzer II	PAIRED	Healthy	Healthy	53	Female	23.03	5.19	2.2	0.72	N/A	1.23	N/A	N/A	N/A	N/A	N/A
Qin (2012)	A metagenome-wide association study of gut microbiota in type 2 diabetes	Nature	PRJNA422434	SAMN00791946	Illumina Genome Analyzer II	PAIRED	Healthy	Healthy	44	Female	24.97	4.79	0.97	2.87	N/A	0.89	N/A	N/A	N/A	N/A	N/A
Qin (2012)	A metagenome-wide association study of gut microbiota in type 2 diabetes	Nature	PRJNA422434	SAMN00791947	Illumina Genome Analyzer II	PAIRED	Healthy	Healthy	54	Female	19.48	5.69	0.59	3.39	N/A	1.45	N/A	N/A	N/A	N/A	N/A
Qin (2012)	A metagenome-wide association study of gut microbiota in type 2 diabetes	Nature	PRJNA422434	SAMN00791949	Illumina Genome Analyzer II	PAIRED	Healthy	Healthy	50	Female	21.08	4.23	0.45	2.25	N/A	2	N/A	N/A	N/A	N/A	N/A
Qin (2012)	A metagenome-wide association study of gut microbiota in type 2 diabetes	Nature	PRJNA422434	SAMN00791950	Illumina Genome Analyzer II	PAIRED	Healthy	Healthy	67	Female	24.34	4.96	0.8	4.39	N/A	1.94	N/A	N/A	N/A	N/A	N/A
Qin (2012)	A metagenome-wide association study of gut microbiota in type 2 diabetes	Nature	PRJNA422434	SAMN00791951	Illumina Genome Analyzer II	PAIRED	Healthy	Healthy	45	Female	21.08	6.54	0.55	2.52	N/A	1.63	N/A	N/A	N/A	N/A	N/A
Qin (2012)	A metagenome-wide association study of gut microbiota in type 2 diabetes	Nature	PRJNA422434	SAMN00791952	Illumina Genome Analyzer II	PAIRED	Healthy	Healthy	58	Female	22.06	4.95	0.73	1.89	N/A	1.46	N/A	N/A	N/A	N/A	N/A
Qin (2012)	A metagenome-wide association study of gut microbiota in type 2 diabetes	Nature	PRJNA422434	SAMN00791953	Illumina Genome Analyzer II	PAIRED	Healthy	Healthy	61	Female	23.73	7.15	1.55	2.93	N/A	1.11	N/A	N/A	N/A	N/A	N/A
Qin (2012)	A metagenome-wide association study of gut microbiota in type 2 diabetes	Nature	PRJNA422434	SAMN00791956	Illumina Genome Analyzer II	PAIRED	Healthy	Healthy	47	Female	21.64	4.71	2.02	3.03	N/A	1.12	N/A	N/A	N/A	N/A	N/A
Qin (2012)	A metagenome-wide association study of gut microbiota in type 2 diabetes	Nature	PRJNA422434	SAMN00791957	Illumina Genome Analyzer II	PAIRED	Healthy	Healthy	46	Female	22.6	6.14	1.06	3.18	N/A	1.72	N/A	N/A	N/A	N/A	N/A
Qin (2012)	A metagenome-wide association study of gut microbiota in type 2 diabetes	Nature	PRJNA422434	SAMN00791958	Illumina Genome Analyzer II	PAIRED	Healthy	Healthy	45	Female	22.22	4.51	0.96	2.76	N/A	1.5	N/A	N/A	N/A	N/A	N/A
Qin (2012)	A metagenome-wide association study of gut microbiota in type 2 diabetes	Nature	PRJNA422434	SAMN00791959	Illumina Genome Analyzer II	PAIRED	Healthy	Healthy	41	Female	23.28	4.58	1.46	2.74	N/A	1.02	N/A	N/A	N/A	N/A	N/A
Qin (2012)	A metagenome-wide association study of gut microbiota in type 2 diabetes	Nature	PRJNA422434	SAMN00791960	Illumina Genome Analyzer II	PAIRED	Healthy	Healthy	34	Female	22.72	4.55	0.71	3.01	N/A	1.24	N/A	N/A	N/A	N/A	N/A
Qin (2012)	A metagenome-wide association study of gut microbiota in type 2 diabetes	Nature	PRJNA422434	SAMN00791962	Illumina Genome Analyzer II	PAIRED	Healthy	Healthy	53	Male	24.61	4.46	1.88	2.89	N/A	0.97	N/A	N/A	N/A	N/A	N/A
Qin (2012)	A metagenome-wide association study of gut microbiota in type 2 diabetes	Nature	PRJNA422434	SAMN00791963	Illumina Genome Analyzer II	PAIRED	Healthy	Healthy	60	Male	22.34	5.99	2.88	3.68	N/A	0.94	N/A	N/A	N/A	N/A	N/A
Qin (2012)	A metagenome-wide association study of gut microbiota in type 2 diabetes	Nature	PRJNA422434	SAMN00791964	Illumina Genome Analyzer II	PAIRED	Healthy	Healthy	69	Male	20.76	5.66	0.93	3.22	N/A	1.28	N/A	N/A	N/A	N/A	N/A
Qin (2012)	A metagenome-wide association study of gut microbiota in type 2 diabetes	Nature	PRJNA422434	SAMN00791966	Illumina Genome Analyzer II	PAIRED	Healthy	Healthy	67	Male	24.02	5.29	1.02	3.03	N/A	1.1	N/A	N/A	N/A	N/A	N/A
Qin (2012)	A metagenome-wide association study of gut microbiota in type 2 diabetes	Nature	PRJNA422434	SAMN00791967	Illumina Genome Analyzer II	PAIRED	Healthy	Healthy	38	Male	22.68	4.11	0.88	2.27	N/A	0.98	N/A	N/A	N/A	N/A	N/A
Qin (2012)	A metagenome-wide association study of gut microbiota in type 2 diabetes	Nature	PRJNA422434	SAMN00791968	Illumina Genome Analyzer II	PAIRED	Healthy	Healthy	56	Male	23.88	4.73	0.79	3.93	N/A	1.31	N/A	N/A	N/A	N/A	N/A
Qin (2012)	A metagenome-wide association study of gut microbiota in type 2 diabetes	Nature	PRJNA422434	SAMN00791969	Illumina Genome Analyzer II	PAIRED	Healthy	Healthy	55	Male	21.55	6.73	0.94	3.89	N/A	1.2	N/A	N/A	N/A	N/A	N/A
Qin (2012)	A metagenome-wide association study of gut microbiota in type 2 diabetes	Nature	PRJNA422434	SAMN00791970	Illumina Genome Analyzer II	PAIRED	Healthy	Healthy	N/A	N/A	N/A	N/A	N/A	N/A	N/A	N/A	N/A	N/A	N/A	N/A	N/A
Qin (2012)	A metagenome-wide association study of gut microbiota in type 2 diabetes	Nature	PRJNA422434	SAMN00791971	Illumina Genome Analyzer II	PAIRED	Healthy	Healthy	55	Male	24.61	4.32	2.58	3.37	N/A	0.9	N/A	N/A	N/A	N/A	N/A
Qin (2012)	A metagenome-wide association study of gut microbiota in type 2 diabetes	Nature	PRJNA422434	SAMN00791978	Illumina Genome Analyzer II	PAIRED	Healthy	Healthy	50	Male	23.07	5.67	0.79	2.26	N/A	0.96	N/A	N/A	N/A	N/A	N/A
Qin (2012)	A metagenome-wide association study of gut microbiota in type 2 diabetes	Nature	PRJNA422434	SAMN00791979	Illumina Genome Analyzer II	PAIRED	Healthy	Healthy	60	Male	21.79	5.45	0.67	1.45	N/A	1.53	N/A	N/A	N/A	N/A	N/A
Qin (2012)	A metagenome-wide association study of gut microbiota in type 2 diabetes	Nature	PRJNA422434	SAMN00792014	Illumina Genome Analyzer II	PAIRED	Healthy	Healthy	49	Male	24.57	4.95	0.71	2.33	N/A	1.08	N/A	N/A	N/A	N/A	N/A
Qin (2012)	A metagenome-wide association study of gut microbiota in type 2 diabetes	Nature	PRJNA422434	SAMN00792016	Illumina Genome Analyzer II	PAIRED	Healthy	Healthy	46	Male	20.9	4.92	0.65	3.12	N/A	1.48	N/A	N/A	N/A	N/A	N/A
Qin (2012)	A metagenome-wide association study of gut microbiota in type 2 diabetes	Nature	PRJNA422434	SAMN00792017	Illumina Genome Analyzer II	PAIRED	Healthy	Healthy	46	Male	22.76	4.96	0.85	2.11	N/A	1.41	N/A	N/A	N/A	N/A	N/A
Karlsson (2013)	Gut metagenome in European women with normal, impaired and diabetic glucose control	Nature	PRJEB1786	SAMEA1906490	Illumina HiSeq 2000	PAIRED	Healthy	Healthy	71.3945	N/A	24.8	5.8	0.91	2.86	5.66	2.39	N/A	N/A	N/A	N/A	N/A
Karlsson (2013)	Gut metagenome in European women with normal, impaired and diabetic glucose control	Nature	PRJEB1786	SAMEA1906441	Illumina HiSeq 2000	PAIRED	Healthy	Healthy	71.1096	N/A	20.4	4.8	0.49	1.71	3.72	1.79	N/A	N/A	N/A	N/A	N/A
Karlsson (2013)	Gut metagenome in European women with normal, impaired and diabetic glucose control	Nature	PRJEB1786	SAMEA1906568	Illumina HiSeq 2000	PAIRED	Healthy	Healthy	70.5452	N/A	23.7	4.7	0.63	3.57	6.39	2.53	N/A	N/A	N/A	N/A	N/A
Karlsson (2013)	Gut metagenome in European women with normal, impaired and diabetic glucose control	Nature	PRJEB1786	SAMEA1906539	Illumina HiSeq 2000	PAIRED	Healthy	Healthy	70.2521	N/A	21.3	4.2	1.03	3.27	5.37	1.63	N/A	N/A	N/A	N/A	N/A
Karlsson (2013)	Gut metagenome in European women with normal, impaired and diabetic glucose control	Nature	PRJEB1786	SAMEA1906565	Illumina HiSeq 2000	PAIRED	Healthy	Healthy	70.6301	N/A	21.6	4.7	1.23	3.28	5.91	2.07	N/A	N/A	N/A	N/A	N/A
Karlsson (2013)	Gut metagenome in European women with normal, impaired and diabetic glucose control	Nature	PRJEB1786	SAMEA1906432	Illumina HiSeq 2000	PAIRED	Healthy	Healthy	71.263	N/A	20.6	5.3	0.91	3.7	6.74	2.62	N/A	N/A	N/A	N/A	N/A
Karlsson (2013)	Gut metagenome in European women with normal, impaired and diabetic glucose control	Nature	PRJEB1786	SAMEA1906433	Illumina HiSeq 2000	PAIRED	Healthy	Healthy	71.8438	N/A	23.1	5.9	0.92	3.9	5.85	1.53	N/A	N/A	N/A	N/A	N/A
Karlsson (2013)	Gut metagenome in European women with normal, impaired and diabetic glucose control	Nature	PRJEB1786	SAMEA1906420	Illumina HiSeq 2000	PAIRED	Healthy	Healthy	71.5288	N/A	21.8	5.2	1.15	3.5	5.73	1.71	N/A	N/A	N/A	N/A	N/A
Karlsson (2013)	Gut metagenome in European women with normal, impaired and diabetic glucose control	Nature	PRJEB1786	SAMEA1906569	Illumina HiSeq 2000	PAIRED	Healthy	Healthy	69.7041	N/A	21.1	5.7	0.78	3	5.55	2.2	N/A	N/A	N/A	N/A	N/A
Karlsson (2013)	Gut metagenome in European women with normal, impaired and diabetic glucose control	Nature	PRJEB1786	SAMEA1906576	Illumina HiSeq 2000	PAIRED	Healthy	Healthy	69.737	N/A	22.6	5	1.03	3.73	6.1	1.9	N/A	N/A	N/A	N/A	N/A
Karlsson (2013)	Gut metagenome in European women with normal, impaired and diabetic glucose control	Nature	PRJEB1786	SAMEA1906491	Illumina HiSeq 2000	PAIRED	Healthy	Healthy	69.7808	N/A	24	5	0.83	2.9	5.39	2.12	N/A	N/A	N/A	N/A	N/A
Karlsson (2013)	Gut metagenome in European women with normal, impaired and diabetic glucose control	Nature	PRJEB1786	SAMEA1906474	Illumina HiSeq 2000	PAIRED	Healthy	Healthy	69.4849	N/A	18.6	4.5	0.99	3.5	6.67	2.72	N/A	N/A	N/A	N/A	N/A
Karlsson (2013)	Gut metagenome in European women with normal, impaired and diabetic glucose control	Nature	PRJEB1786	SAMEA1906459	Illumina HiSeq 2000	PAIRED	Healthy	Healthy	70.2438	N/A	21.6	5.6	0.42	4.16	6.88	2.53	N/A	N/A	N/A	N/A	N/A
Karlsson (2013)	Gut metagenome in European women with normal, impaired and diabetic glucose control	Nature	PRJEB1786	SAMEA1906481	Illumina HiSeq 2000	PAIRED	Healthy	Healthy	70.3397	N/A	21.5	5	0.83	2.83	5.56	2.35	N/A	N/A	N/A	N/A	N/A
Karlsson (2013)	Gut metagenome in European women with normal, impaired and diabetic glucose control	Nature	PRJEB1786	SAMEA1906443	Illumina HiSeq 2000	PAIRED	Healthy	Healthy	70.0603	N/A	24.6	5.3	1.18	4.07	6.35	1.74	N/A	N/A	N/A	N/A	N/A
Karlsson (2013)	Gut metagenome in European women with normal, impaired and diabetic glucose control	Nature	PRJEB1786	SAMEA1906427	Illumina HiSeq 2000	PAIRED	Healthy	Healthy	70.2137	N/A	24.2	5.8	1.68	3.45	6.51	2.3	N/A	N/A	N/A	N/A	N/A
Karlsson (2013)	Gut metagenome in European women with normal, impaired and diabetic glucose control	Nature	PRJEB1786	SAMEA1906563	Illumina HiSeq 2000	PAIRED	Healthy	Healthy	70.8466	N/A	21.9	5.7	0.9	1.96	4.15	1.78	N/A	N/A	N/A	N/A	N/A
Karlsson (2013)	Gut metagenome in European women with normal, impaired and diabetic glucose control	Nature	PRJEB1786	SAMEA1906453	Illumina HiSeq 2000	PAIRED	Healthy	Healthy	70.0466	N/A	23.2	5	0.92	4.99	7.62	2.21	N/A	N/A	N/A	N/A	N/A
Qin (2014)	Alterations of the human gut microbiome in liver cirrhosis	Nature	PRJEB6337	SAMEA2581875	Illumina HiSeq 2000	PAIRED	Healthy	Healthy	40	Female	20.0288	N/A	N/A	N/A	N/A	N/A	N/A	N/A	N/A	N/A	N/A
Qin (2014)	Alterations of the human gut microbiome in liver cirrhosis	Nature	PRJEB6337	SAMEA2581978	Illumina HiSeq 2000	PAIRED	Healthy	Healthy	43	Male	20.9375	N/A	N/A	N/A	N/A	N/A	N/A	N/A	N/A	N/A	N/A
Qin (2014)	Alterations of the human gut microbiome in liver cirrhosis	Nature	PRJEB6337	SAMEA2581979	Illumina HiSeq 2000	PAIRED	Healthy	Healthy	45	Female	20.0692	N/A	N/A	N/A	N/A	N/A	N/A	N/A	N/A	N/A	N/A
Qin (2014)	Alterations of the human gut microbiome in liver cirrhosis	Nature	PRJEB6337	SAMEA2581980	Illumina HiSeq 2000	PAIRED	Healthy	Healthy	34	Male	22.8624	N/A	N/A	N/A	N/A	N/A	N/A	N/A	N/A	N/A	N/A
Qin (2014)	Alterations of the human gut microbiome in liver cirrhosis	Nature	PRJEB6337	SAMEA2581982	Illumina HiSeq 2000	PAIRED	Healthy	Healthy	60	Male	23.3564	N/A	N/A	N/A	N/A	N/A	N/A	N/A	N/A	N/A	N/A
Qin (2014)	Alterations of the human gut microbiome in liver cirrhosis	Nature	PRJEB6337	SAMEA2581987	Illumina HiSeq 2000	PAIRED	Healthy	Healthy	52	Male	23.3323	N/A	N/A	N/A	N/A	N/A	N/A	N/A	N/A	N/A	N/A
Qin (2014)	Alterations of the human gut microbiome in liver cirrhosis	Nature	PRJEB6337	SAMEA2581989	Illumina HiSeq 2000	PAIRED	Healthy	Healthy	34	Female	20.202	N/A	N/A	N/A	N/A	N/A	N/A	N/A	N/A	N/A	N/A
Qin (2014)	Alterations of the human gut microbiome in liver cirrhosis	Nature	PRJEB6337	SAMEA2581990	Illumina HiSeq 2000	PAIRED	Healthy	Healthy	45	Female	19.052	N/A	N/A	N/A	N/A	N/A	N/A	N/A	N/A	N/A	N/A
Qin (2014)	Alterations of the human gut microbiome in liver cirrhosis	Nature	PRJEB6337	SAMEA2581998	Illumina HiSeq 2000	PAIRED	Healthy	Healthy	27	Male	20.984	N/A	N/A	N/A	N/A	N/A	N/A	N/A	N/A	N/A	N/A
Qin (2014)	Alterations of the human gut microbiome in liver cirrhosis	Nature	PRJEB6337	SAMEA2581999	Illumina HiSeq 2000	PAIRED	Healthy	Healthy	32	Male	23.1834	N/A	N/A	N/A	N/A	N/A	N/A	N/A	N/A	N/A	N/A
Qin (2014)	Alterations of the human gut microbiome in liver cirrhosis	Nature	PRJEB6337	SAMEA2582000	Illumina HiSeq 2000	PAIRED	Healthy	Healthy	38	Male	24.1633	N/A	N/A	N/A	N/A	N/A	N/A	N/A	N/A	N/A	N/A
Qin (2014)	Alterations of the human gut microbiome in liver cirrhosis	Nature	PRJEB6337	SAMEA2582002	Illumina HiSeq 2000	PAIRED	Healthy	Healthy	32	Male	22.9417	N/A	N/A	N/A	N/A	N/A	N/A	N/A	N/A	N/A	N/A
Qin (2014)	Alterations of the human gut microbiome in liver cirrhosis	Nature	PRJEB6337	SAMEA2582003	Illumina HiSeq 2000	PAIRED	Healthy	Healthy	32	Female	20.4201	N/A	N/A	N/A	N/A	N/A	N/A	N/A	N/A	N/A	N/A
Qin (2014)	Alterations of the human gut microbiome in liver cirrhosis	Nature	PRJEB6337	SAMEA2582005	Illumina HiSeq 2000	PAIRED	Healthy	Healthy	51	Male	19.764	N/A	N/A	N/A	N/A	N/A	N/A	N/A	N/A	N/A	N/A
Qin (2014)	Alterations of the human gut microbiome in liver cirrhosis	Nature	PRJEB6337	SAMEA2582006	Illumina HiSeq 2000	PAIRED	Healthy	Healthy	54	Male	22.9568	N/A	N/A	N/A	N/A	N/A	N/A	N/A	N/A	N/A	N/A
Qin (2014)	Alterations of the human gut microbiome in liver cirrhosis	Nature	PRJEB6337	SAMEA2582007	Illumina HiSeq 2000	PAIRED	Healthy	Healthy	46	Female	21.3039	N/A	N/A	N/A	N/A	N/A	N/A	N/A	N/A	N/A	N/A
Qin (2014)	Alterations of the human gut microbiome in liver cirrhosis	Nature	PRJEB6337	SAMEA2582008	Illumina HiSeq 2000	PAIRED	Healthy	Healthy	39	Male	24.2665	N/A	N/A	N/A	N/A	N/A	N/A	N/A	N/A	N/A	N/A
Qin (2014)	Alterations of the human gut microbiome in liver cirrhosis	Nature	PRJEB6337	SAMEA2582009	Illumina HiSeq 2000	PAIRED	Healthy	Healthy	47	Male	20.0474	N/A	N/A	N/A	N/A	N/A	N/A	N/A	N/A	N/A	N/A
Qin (2014)	Alterations of the human gut microbiome in liver cirrhosis	Nature	PRJEB6337	SAMEA2582013	Illumina HiSeq 2000	PAIRED	Healthy	Healthy	45	Male	23.939	N/A	N/A	N/A	N/A	N/A	N/A	N/A	N/A	N/A	N/A
Qin (2014)	Alterations of the human gut microbiome in liver cirrhosis	Nature	PRJEB6337	SAMEA2582014	Illumina HiSeq 2000	PAIRED	Healthy	Healthy	69	Male	22.7732	N/A	N/A	N/A	N/A	N/A	N/A	N/A	N/A	N/A	N/A
Qin (2014)	Alterations of the human gut microbiome in liver cirrhosis	Nature	PRJEB6337	SAMEA2582017	Illumina HiSeq 2000	PAIRED	Healthy	Healthy	37	Male	21.0077	N/A	N/A	N/A	N/A	N/A	N/A	N/A	N/A	N/A	N/A
Qin (2014)	Alterations of the human gut microbiome in liver cirrhosis	Nature	PRJEB6337	SAMEA2581876	Illumina HiSeq 2000	PAIRED	Healthy	Healthy	40	Female	20.1951	N/A	N/A	N/A	N/A	N/A	N/A	N/A	N/A	N/A	N/A
Qin (2014)	Alterations of the human gut microbiome in liver cirrhosis	Nature	PRJEB6337	SAMEA2581877	Illumina HiSeq 2000	PAIRED	Healthy	Healthy	38	Female	19.9481	N/A	N/A	N/A	N/A	N/A	N/A	N/A	N/A	N/A	N/A
Qin (2014)	Alterations of the human gut microbiome in liver cirrhosis	Nature	PRJEB6337	SAMEA2581878	Illumina HiSeq 2000	PAIRED	Healthy	Healthy	40	Male	22.546	N/A	N/A	N/A	N/A	N/A	N/A	N/A	N/A	N/A	N/A
Qin (2014)	Alterations of the human gut microbiome in liver cirrhosis	Nature	PRJEB6337	SAMEA2581879	Illumina HiSeq 2000	PAIRED	Healthy	Healthy	56	Female	21.4844	N/A	N/A	N/A	N/A	N/A	N/A	N/A	N/A	N/A	N/A
Qin (2014)	Alterations of the human gut microbiome in liver cirrhosis	Nature	PRJEB6337	SAMEA2581881	Illumina HiSeq 2000	PAIRED	Healthy	Healthy	51	Male	22.5827	N/A	N/A	N/A	N/A	N/A	N/A	N/A	N/A	N/A	N/A
Qin (2014)	Alterations of the human gut microbiome in liver cirrhosis	Nature	PRJEB6337	SAMEA2581884	Illumina HiSeq 2000	PAIRED	Healthy	Healthy	41	Female	24.4352	N/A	N/A	N/A	N/A	N/A	N/A	N/A	N/A	N/A	N/A
Qin (2014)	Alterations of the human gut microbiome in liver cirrhosis	Nature	PRJEB6337	SAMEA2581886	Illumina HiSeq 2000	PAIRED	Healthy	Healthy	46	Male	23.0518	N/A	N/A	N/A	N/A	N/A	N/A	N/A	N/A	N/A	N/A
Qin (2014)	Alterations of the human gut microbiome in liver cirrhosis	Nature	PRJEB6337	SAMEA2581888	Illumina HiSeq 2000	PAIRED	Healthy	Healthy	43	Male	22.3094	N/A	N/A	N/A	N/A	N/A	N/A	N/A	N/A	N/A	N/A
Qin (2014)	Alterations of the human gut microbiome in liver cirrhosis	Nature	PRJEB6337	SAMEA2581890	Illumina HiSeq 2000	PAIRED	Healthy	Healthy	57	Male	21.875	N/A	N/A	N/A	N/A	N/A	N/A	N/A	N/A	N/A	N/A
Qin (2014)	Alterations of the human gut microbiome in liver cirrhosis	Nature	PRJEB6337	SAMEA2581892	Illumina HiSeq 2000	PAIRED	Healthy	Healthy	46	Female	20.83	N/A	N/A	N/A	N/A	N/A	N/A	N/A	N/A	N/A	N/A
Qin (2014)	Alterations of the human gut microbiome in liver cirrhosis	Nature	PRJEB6337	SAMEA2581893	Illumina HiSeq 2000	PAIRED	Healthy	Healthy	45	Male	22.7903	N/A	N/A	N/A	N/A	N/A	N/A	N/A	N/A	N/A	N/A
Qin (2014)	Alterations of the human gut microbiome in liver cirrhosis	Nature	PRJEB6337	SAMEA2581894	Illumina HiSeq 2000	PAIRED	Healthy	Healthy	37	Male	22.6627	N/A	N/A	N/A	N/A	N/A	N/A	N/A	N/A	N/A	N/A
Qin (2014)	Alterations of the human gut microbiome in liver cirrhosis	Nature	PRJEB6337	SAMEA2581895	Illumina HiSeq 2000	PAIRED	Healthy	Healthy	41	Female	24.4352	N/A	N/A	N/A	N/A	N/A	N/A	N/A	N/A	N/A	N/A
Qin (2014)	Alterations of the human gut microbiome in liver cirrhosis	Nature	PRJEB6337	SAMEA2581896	Illumina HiSeq 2000	PAIRED	Healthy	Healthy	35	Female	19.2234	N/A	N/A	N/A	N/A	N/A	N/A	N/A	N/A	N/A	N/A
Qin (2014)	Alterations of the human gut microbiome in liver cirrhosis	Nature	PRJEB6337	SAMEA2581897	Illumina HiSeq 2000	PAIRED	Healthy	Healthy	36	Male	20.7008	N/A	N/A	N/A	N/A	N/A	N/A	N/A	N/A	N/A	N/A
Qin (2014)	Alterations of the human gut microbiome in liver cirrhosis	Nature	PRJEB6337	SAMEA2581900	Illumina HiSeq 2000	PAIRED	Healthy	Healthy	40	Female	20.3244	N/A	N/A	N/A	N/A	N/A	N/A	N/A	N/A	N/A	N/A
Qin (2014)	Alterations of the human gut microbiome in liver cirrhosis	Nature	PRJEB6337	SAMEA2581901	Illumina HiSeq 2000	PAIRED	Healthy	Healthy	45	Male	19.9432	N/A	N/A	N/A	N/A	N/A	N/A	N/A	N/A	N/A	N/A
Qin (2014)	Alterations of the human gut microbiome in liver cirrhosis	Nature	PRJEB6337	SAMEA2581902	Illumina HiSeq 2000	PAIRED	Healthy	Healthy	33	Male	21.2852	N/A	N/A	N/A	N/A	N/A	N/A	N/A	N/A	N/A	N/A
Qin (2014)	Alterations of the human gut microbiome in liver cirrhosis	Nature	PRJEB6337	SAMEA2581903	Illumina HiSeq 2000	PAIRED	Healthy	Healthy	33	Female	20.3125	N/A	N/A	N/A	N/A	N/A	N/A	N/A	N/A	N/A	N/A
Qin (2014)	Alterations of the human gut microbiome in liver cirrhosis	Nature	PRJEB6337	SAMEA2581904	Illumina HiSeq 2000	PAIRED	Healthy	Healthy	45	Male	19.5797	N/A	N/A	N/A	N/A	N/A	N/A	N/A	N/A	N/A	N/A
Qin (2014)	Alterations of the human gut microbiome in liver cirrhosis	Nature	PRJEB6337	SAMEA2581906	Illumina HiSeq 2000	PAIRED	Healthy	Healthy	54	Female	23.4375	N/A	N/A	N/A	N/A	N/A	N/A	N/A	N/A	N/A	N/A
Qin (2014)	Alterations of the human gut microbiome in liver cirrhosis	Nature	PRJEB6337	SAMEA2581907	Illumina HiSeq 2000	PAIRED	Healthy	Healthy	43	Male	22.4913	N/A	N/A	N/A	N/A	N/A	N/A	N/A	N/A	N/A	N/A
Qin (2014)	Alterations of the human gut microbiome in liver cirrhosis	Nature	PRJEB6337	SAMEA2581908	Illumina HiSeq 2000	PAIRED	Healthy	Healthy	54	Female	22.719	N/A	N/A	N/A	N/A	N/A	N/A	N/A	N/A	N/A	N/A
Qin (2014)	Alterations of the human gut microbiome in liver cirrhosis	Nature	PRJEB6337	SAMEA2581909	Illumina HiSeq 2000	PAIRED	Healthy	Healthy	34	Female	20.5688	N/A	N/A	N/A	N/A	N/A	N/A	N/A	N/A	N/A	N/A
Qin (2014)	Alterations of the human gut microbiome in liver cirrhosis	Nature	PRJEB6337	SAMEA2581910	Illumina HiSeq 2000	PAIRED	Healthy	Healthy	40	Female	18.5901	N/A	N/A	N/A	N/A	N/A	N/A	N/A	N/A	N/A	N/A
Qin (2014)	Alterations of the human gut microbiome in liver cirrhosis	Nature	PRJEB6337	SAMEA2581911	Illumina HiSeq 2000	PAIRED	Healthy	Healthy	48	Male	23.8895	N/A	N/A	N/A	N/A	N/A	N/A	N/A	N/A	N/A	N/A
Qin (2014)	Alterations of the human gut microbiome in liver cirrhosis	Nature	PRJEB6337	SAMEA2581912	Illumina HiSeq 2000	PAIRED	Healthy	Healthy	32	Female	20.3223	N/A	N/A	N/A	N/A	N/A	N/A	N/A	N/A	N/A	N/A
Qin (2014)	Alterations of the human gut microbiome in liver cirrhosis	Nature	PRJEB6337	SAMEA2581913	Illumina HiSeq 2000	PAIRED	Healthy	Healthy	45	Female	20.1733	N/A	N/A	N/A	N/A	N/A	N/A	N/A	N/A	N/A	N/A
Qin (2014)	Alterations of the human gut microbiome in liver cirrhosis	Nature	PRJEB6337	SAMEA2581915	Illumina HiSeq 2000	PAIRED	Healthy	Healthy	40	Male	20.0474	N/A	N/A	N/A	N/A	N/A	N/A	N/A	N/A	N/A	N/A
Qin (2014)	Alterations of the human gut microbiome in liver cirrhosis	Nature	PRJEB6337	SAMEA2581916	Illumina HiSeq 2000	PAIRED	Healthy	Healthy	51	Female	22.8624	N/A	N/A	N/A	N/A	N/A	N/A	N/A	N/A	N/A	N/A
Qin (2014)	Alterations of the human gut microbiome in liver cirrhosis	Nature	PRJEB6337	SAMEA2581918	Illumina HiSeq 2000	PAIRED	Healthy	Healthy	38	Male	20.0474	N/A	N/A	N/A	N/A	N/A	N/A	N/A	N/A	N/A	N/A
Qin (2014)	Alterations of the human gut microbiome in liver cirrhosis	Nature	PRJEB6337	SAMEA2581919	Illumina HiSeq 2000	PAIRED	Healthy	Healthy	41	Male	20.5693	N/A	N/A	N/A	N/A	N/A	N/A	N/A	N/A	N/A	N/A
Qin (2014)	Alterations of the human gut microbiome in liver cirrhosis	Nature	PRJEB6337	SAMEA2581920	Illumina HiSeq 2000	PAIRED	Healthy	Healthy	52	Male	19.9184	N/A	N/A	N/A	N/A	N/A	N/A	N/A	N/A	N/A	N/A
Qin (2014)	Alterations of the human gut microbiome in liver cirrhosis	Nature	PRJEB6337	SAMEA2581922	Illumina HiSeq 2000	PAIRED	Healthy	Healthy	36	Male	19.7133	N/A	N/A	N/A	N/A	N/A	N/A	N/A	N/A	N/A	N/A
Qin (2014)	Alterations of the human gut microbiome in liver cirrhosis	Nature	PRJEB6337	SAMEA2581924	Illumina HiSeq 2000	PAIRED	Healthy	Healthy	41	Male	23.9198	N/A	N/A	N/A	N/A	N/A	N/A	N/A	N/A	N/A	N/A
Qin (2014)	Alterations of the human gut microbiome in liver cirrhosis	Nature	PRJEB6337	SAMEA2581926	Illumina HiSeq 2000	PAIRED	Healthy	Healthy	37	Male	22.3954	N/A	N/A	N/A	N/A	N/A	N/A	N/A	N/A	N/A	N/A
Qin (2014)	Alterations of the human gut microbiome in liver cirrhosis	Nature	PRJEB6337	SAMEA2581928	Illumina HiSeq 2000	PAIRED	Healthy	Healthy	35	Male	24.0569	N/A	N/A	N/A	N/A	N/A	N/A	N/A	N/A	N/A	N/A
Qin (2014)	Alterations of the human gut microbiome in liver cirrhosis	Nature	PRJEB6337	SAMEA2581929	Illumina HiSeq 2000	PAIRED	Healthy	Healthy	58	Male	23.6244	N/A	N/A	N/A	N/A	N/A	N/A	N/A	N/A	N/A	N/A
Qin (2014)	Alterations of the human gut microbiome in liver cirrhosis	Nature	PRJEB6337	SAMEA2581931	Illumina HiSeq 2000	PAIRED	Healthy	Healthy	31	Male	22.7583	N/A	N/A	N/A	N/A	N/A	N/A	N/A	N/A	N/A	N/A
Qin (2014)	Alterations of the human gut microbiome in liver cirrhosis	Nature	PRJEB6337	SAMEA2581934	Illumina HiSeq 2000	PAIRED	Healthy	Healthy	43	Female	22.3757	N/A	N/A	N/A	N/A	N/A	N/A	N/A	N/A	N/A	N/A
Qin (2014)	Alterations of the human gut microbiome in liver cirrhosis	Nature	PRJEB6337	SAMEA2581936	Illumina HiSeq 2000	PAIRED	Healthy	Healthy	37	Male	22.8571	N/A	N/A	N/A	N/A	N/A	N/A	N/A	N/A	N/A	N/A
Qin (2014)	Alterations of the human gut microbiome in liver cirrhosis	Nature	PRJEB6337	SAMEA2581937	Illumina HiSeq 2000	PAIRED	Healthy	Healthy	50	Female	19.5312	N/A	N/A	N/A	N/A	N/A	N/A	N/A	N/A	N/A	N/A
Qin (2014)	Alterations of the human gut microbiome in liver cirrhosis	Nature	PRJEB6337	SAMEA2581938	Illumina HiSeq 2000	PAIRED	Healthy	Healthy	50	Female	20.5499	N/A	N/A	N/A	N/A	N/A	N/A	N/A	N/A	N/A	N/A
Qin (2014)	Alterations of the human gut microbiome in liver cirrhosis	Nature	PRJEB6337	SAMEA2581939	Illumina HiSeq 2000	PAIRED	Healthy	Healthy	47	Male	20.7612	N/A	N/A	N/A	N/A	N/A	N/A	N/A	N/A	N/A	N/A
Qin (2014)	Alterations of the human gut microbiome in liver cirrhosis	Nature	PRJEB6337	SAMEA2581941	Illumina HiSeq 2000	PAIRED	Healthy	Healthy	37	Male	22.0386	N/A	N/A	N/A	N/A	N/A	N/A	N/A	N/A	N/A	N/A
Qin (2014)	Alterations of the human gut microbiome in liver cirrhosis	Nature	PRJEB6337	SAMEA2581943	Illumina HiSeq 2000	PAIRED	Healthy	Healthy	31	Male	19.0311	N/A	N/A	N/A	N/A	N/A	N/A	N/A	N/A	N/A	N/A
Qin (2014)	Alterations of the human gut microbiome in liver cirrhosis	Nature	PRJEB6337	SAMEA2581944	Illumina HiSeq 2000	PAIRED	Healthy	Healthy	32	Male	20.9042	N/A	N/A	N/A	N/A	N/A	N/A	N/A	N/A	N/A	N/A
Qin (2014)	Alterations of the human gut microbiome in liver cirrhosis	Nature	PRJEB6337	SAMEA2581946	Illumina HiSeq 2000	PAIRED	Healthy	Healthy	52	Male	19.0311	N/A	N/A	N/A	N/A	N/A	N/A	N/A	N/A	N/A	N/A
Qin (2014)	Alterations of the human gut microbiome in liver cirrhosis	Nature	PRJEB6337	SAMEA2581949	Illumina HiSeq 2000	PAIRED	Healthy	Healthy	38	Female	21.4844	N/A	N/A	N/A	N/A	N/A	N/A	N/A	N/A	N/A	N/A
Qin (2014)	Alterations of the human gut microbiome in liver cirrhosis	Nature	PRJEB6337	SAMEA2581951	Illumina HiSeq 2000	PAIRED	Healthy	Healthy	34	Male	20.5151	N/A	N/A	N/A	N/A	N/A	N/A	N/A	N/A	N/A	N/A
Qin (2014)	Alterations of the human gut microbiome in liver cirrhosis	Nature	PRJEB6337	SAMEA2581952	Illumina HiSeq 2000	PAIRED	Healthy	Healthy	31	Male	20.1771	N/A	N/A	N/A	N/A	N/A	N/A	N/A	N/A	N/A	N/A
Qin (2014)	Alterations of the human gut microbiome in liver cirrhosis	Nature	PRJEB6337	SAMEA2581953	Illumina HiSeq 2000	PAIRED	Healthy	Healthy	62	Male	20.5761	N/A	N/A	N/A	N/A	N/A	N/A	N/A	N/A	N/A	N/A
Qin (2014)	Alterations of the human gut microbiome in liver cirrhosis	Nature	PRJEB6337	SAMEA2581954	Illumina HiSeq 2000	PAIRED	Healthy	Healthy	42	Female	19.9219	N/A	N/A	N/A	N/A	N/A	N/A	N/A	N/A	N/A	N/A
Qin (2014)	Alterations of the human gut microbiome in liver cirrhosis	Nature	PRJEB6337	SAMEA2581956	Illumina HiSeq 2000	PAIRED	Healthy	Healthy	43	Female	24.977	N/A	N/A	N/A	N/A	N/A	N/A	N/A	N/A	N/A	N/A
Qin (2014)	Alterations of the human gut microbiome in liver cirrhosis	Nature	PRJEB6337	SAMEA2581957	Illumina HiSeq 2000	PAIRED	Healthy	Healthy	42	Male	21.7498	N/A	N/A	N/A	N/A	N/A	N/A	N/A	N/A	N/A	N/A
Qin (2014)	Alterations of the human gut microbiome in liver cirrhosis	Nature	PRJEB6337	SAMEA2581958	Illumina HiSeq 2000	PAIRED	Healthy	Healthy	32	Male	19.2374	N/A	N/A	N/A	N/A	N/A	N/A	N/A	N/A	N/A	N/A
Qin (2014)	Alterations of the human gut microbiome in liver cirrhosis	Nature	PRJEB6337	SAMEA2581959	Illumina HiSeq 2000	PAIRED	Healthy	Healthy	33	Male	19.5918	N/A	N/A	N/A	N/A	N/A	N/A	N/A	N/A	N/A	N/A
Qin (2014)	Alterations of the human gut microbiome in liver cirrhosis	Nature	PRJEB6337	SAMEA2581960	Illumina HiSeq 2000	PAIRED	Healthy	Healthy	26	Male	22.7269	N/A	N/A	N/A	N/A	N/A	N/A	N/A	N/A	N/A	N/A
Qin (2014)	Alterations of the human gut microbiome in liver cirrhosis	Nature	PRJEB6337	SAMEA2581963	Illumina HiSeq 2000	PAIRED	Healthy	Healthy	36	Female	20.0856	N/A	N/A	N/A	N/A	N/A	N/A	N/A	N/A	N/A	N/A
Qin (2014)	Alterations of the human gut microbiome in liver cirrhosis	Nature	PRJEB6337	SAMEA2581964	Illumina HiSeq 2000	PAIRED	Healthy	Healthy	47	Male	22.4551	N/A	N/A	N/A	N/A	N/A	N/A	N/A	N/A	N/A	N/A
Qin (2014)	Alterations of the human gut microbiome in liver cirrhosis	Nature	PRJEB6337	SAMEA2581965	Illumina HiSeq 2000	PAIRED	Healthy	Healthy	45	Female	22.6347	N/A	N/A	N/A	N/A	N/A	N/A	N/A	N/A	N/A	N/A
Qin (2014)	Alterations of the human gut microbiome in liver cirrhosis	Nature	PRJEB6337	SAMEA2581966	Illumina HiSeq 2000	PAIRED	Healthy	Healthy	40	Female	19.9219	N/A	N/A	N/A	N/A	N/A	N/A	N/A	N/A	N/A	N/A
Qin (2014)	Alterations of the human gut microbiome in liver cirrhosis	Nature	PRJEB6337	SAMEA2581967	Illumina HiSeq 2000	PAIRED	Healthy	Healthy	35	Male	21.5543	N/A	N/A	N/A	N/A	N/A	N/A	N/A	N/A	N/A	N/A
Qin (2014)	Alterations of the human gut microbiome in liver cirrhosis	Nature	PRJEB6337	SAMEA2581969	Illumina HiSeq 2000	PAIRED	Healthy	Healthy	35	Male	24.0449	N/A	N/A	N/A	N/A	N/A	N/A	N/A	N/A	N/A	N/A
Qin (2014)	Alterations of the human gut microbiome in liver cirrhosis	Nature	PRJEB6337	SAMEA2581961	Illumina HiSeq 2000	PAIRED	Healthy	Healthy	37	Female	21.9899	N/A	N/A	N/A	N/A	N/A	N/A	N/A	N/A	N/A	N/A
Qin (2014)	Alterations of the human gut microbiome in liver cirrhosis	Nature	PRJEB6337	SAMEA2581971	Illumina HiSeq 2000	PAIRED	Healthy	Healthy	25	Male	20.9256	N/A	N/A	N/A	N/A	N/A	N/A	N/A	N/A	N/A	N/A
Qin (2014)	Alterations of the human gut microbiome in liver cirrhosis	Nature	PRJEB6337	SAMEA2581973	Illumina HiSeq 2000	PAIRED	Healthy	Healthy	43	Male	22.9459	N/A	N/A	N/A	N/A	N/A	N/A	N/A	N/A	N/A	N/A
Qin (2014)	Alterations of the human gut microbiome in liver cirrhosis	Nature	PRJEB6337	SAMEA2581974	Illumina HiSeq 2000	PAIRED	Healthy	Healthy	45	Male	20.0474	N/A	N/A	N/A	N/A	N/A	N/A	N/A	N/A	N/A	N/A
Qin (2014)	Alterations of the human gut microbiome in liver cirrhosis	Nature	PRJEB6337	SAMEA2581975	Illumina HiSeq 2000	PAIRED	Healthy	Healthy	58	Male	21.9713	N/A	N/A	N/A	N/A	N/A	N/A	N/A	N/A	N/A	N/A
Qin (2014)	Alterations of the human gut microbiome in liver cirrhosis	Nature	PRJEB6337	SAMEA2581976	Illumina HiSeq 2000	PAIRED	Healthy	Healthy	42	Male	21.6209	N/A	N/A	N/A	N/A	N/A	N/A	N/A	N/A	N/A	N/A
Qin (2014)	Alterations of the human gut microbiome in liver cirrhosis	Nature	PRJEB6337	SAMEA2581977	Illumina HiSeq 2000	PAIRED	Healthy	Healthy	39	Female	18.7305	N/A	N/A	N/A	N/A	N/A	N/A	N/A	N/A	N/A	N/A
Liu (2017)	Gut microbiome and serum metabolome alterations in obesity and after weight-loss intervention	Nature Medicine	PRJEB12123	SAMEA3708547	Illumina HiSeq 2500	PAIRED	Healthy	Healthy	Adult	N/A	<23	N/A	N/A	N/A	N/A	N/A	N/A	N/A	N/A	N/A	N/A
Liu (2017)	Gut microbiome and serum metabolome alterations in obesity and after weight-loss intervention	Nature Medicine	PRJEB12123	SAMEA3708548	Illumina HiSeq 2500	PAIRED	Healthy	Healthy	Adult	N/A	<23	N/A	N/A	N/A	N/A	N/A	N/A	N/A	N/A	N/A	N/A
Liu (2017)	Gut microbiome and serum metabolome alterations in obesity and after weight-loss intervention	Nature Medicine	PRJEB12123	SAMEA3708549	Illumina HiSeq 2500	PAIRED	Healthy	Healthy	Adult	N/A	<23	N/A	N/A	N/A	N/A	N/A	N/A	N/A	N/A	N/A	N/A
Liu (2017)	Gut microbiome and serum metabolome alterations in obesity and after weight-loss intervention	Nature Medicine	PRJEB12123	SAMEA3708550	Illumina HiSeq 2500	PAIRED	Healthy	Healthy	Adult	N/A	<23	N/A	N/A	N/A	N/A	N/A	N/A	N/A	N/A	N/A	N/A
Liu (2017)	Gut microbiome and serum metabolome alterations in obesity and after weight-loss intervention	Nature Medicine	PRJEB12123	SAMEA3708551	Illumina HiSeq 2500	PAIRED	Healthy	Healthy	Adult	N/A	<23	N/A	N/A	N/A	N/A	N/A	N/A	N/A	N/A	N/A	N/A
Liu (2017)	Gut microbiome and serum metabolome alterations in obesity and after weight-loss intervention	Nature Medicine	PRJEB12123	SAMEA3708552	Illumina HiSeq 2500	PAIRED	Healthy	Healthy	Adult	N/A	<23	N/A	N/A	N/A	N/A	N/A	N/A	N/A	N/A	N/A	N/A
Liu (2017)	Gut microbiome and serum metabolome alterations in obesity and after weight-loss intervention	Nature Medicine	PRJEB12123	SAMEA3708553	Illumina HiSeq 2500	PAIRED	Healthy	Healthy	Adult	N/A	<23	N/A	N/A	N/A	N/A	N/A	N/A	N/A	N/A	N/A	N/A
Liu (2017)	Gut microbiome and serum metabolome alterations in obesity and after weight-loss intervention	Nature Medicine	PRJEB12123	SAMEA3708554	Illumina HiSeq 2500	PAIRED	Healthy	Healthy	Adult	N/A	<23	N/A	N/A	N/A	N/A	N/A	N/A	N/A	N/A	N/A	N/A
Liu (2017)	Gut microbiome and serum metabolome alterations in obesity and after weight-loss intervention	Nature Medicine	PRJEB12123	SAMEA3708555	Illumina HiSeq 2500	PAIRED	Healthy	Healthy	Adult	N/A	<23	N/A	N/A	N/A	N/A	N/A	N/A	N/A	N/A	N/A	N/A
Liu (2017)	Gut microbiome and serum metabolome alterations in obesity and after weight-loss intervention	Nature Medicine	PRJEB12123	SAMEA3708556	Illumina HiSeq 2500	PAIRED	Healthy	Healthy	Adult	N/A	<23	N/A	N/A	N/A	N/A	N/A	N/A	N/A	N/A	N/A	N/A
Liu (2017)	Gut microbiome and serum metabolome alterations in obesity and after weight-loss intervention	Nature Medicine	PRJEB12123	SAMEA3708557	Illumina HiSeq 2500	PAIRED	Healthy	Healthy	Adult	N/A	<23	N/A	N/A	N/A	N/A	N/A	N/A	N/A	N/A	N/A	N/A
Liu (2017)	Gut microbiome and serum metabolome alterations in obesity and after weight-loss intervention	Nature Medicine	PRJEB12123	SAMEA3708558	Illumina HiSeq 2500	PAIRED	Healthy	Healthy	Adult	N/A	<23	N/A	N/A	N/A	N/A	N/A	N/A	N/A	N/A	N/A	N/A
Liu (2017)	Gut microbiome and serum metabolome alterations in obesity and after weight-loss intervention	Nature Medicine	PRJEB12123	SAMEA3708559	Illumina HiSeq 2500	PAIRED	Healthy	Healthy	Adult	N/A	<23	N/A	N/A	N/A	N/A	N/A	N/A	N/A	N/A	N/A	N/A
Liu (2017)	Gut microbiome and serum metabolome alterations in obesity and after weight-loss intervention	Nature Medicine	PRJEB12123	SAMEA3708560	Illumina HiSeq 2500	PAIRED	Healthy	Healthy	Adult	N/A	<23	N/A	N/A	N/A	N/A	N/A	N/A	N/A	N/A	N/A	N/A
Liu (2017)	Gut microbiome and serum metabolome alterations in obesity and after weight-loss intervention	Nature Medicine	PRJEB12123	SAMEA3708561	Illumina HiSeq 2500	PAIRED	Healthy	Healthy	Adult	N/A	<23	N/A	N/A	N/A	N/A	N/A	N/A	N/A	N/A	N/A	N/A
Liu (2017)	Gut microbiome and serum metabolome alterations in obesity and after weight-loss intervention	Nature Medicine	PRJEB12123	SAMEA3708562	Illumina HiSeq 2500	PAIRED	Healthy	Healthy	Adult	N/A	<23	N/A	N/A	N/A	N/A	N/A	N/A	N/A	N/A	N/A	N/A
Liu (2017)	Gut microbiome and serum metabolome alterations in obesity and after weight-loss intervention	Nature Medicine	PRJEB12123	SAMEA3708563	Illumina HiSeq 2500	PAIRED	Healthy	Healthy	Adult	N/A	<23	N/A	N/A	N/A	N/A	N/A	N/A	N/A	N/A	N/A	N/A
Liu (2017)	Gut microbiome and serum metabolome alterations in obesity and after weight-loss intervention	Nature Medicine	PRJEB12123	SAMEA3708564	Illumina HiSeq 2500	PAIRED	Healthy	Healthy	Adult	N/A	<23	N/A	N/A	N/A	N/A	N/A	N/A	N/A	N/A	N/A	N/A
Liu (2017)	Gut microbiome and serum metabolome alterations in obesity and after weight-loss intervention	Nature Medicine	PRJEB12123	SAMEA3708565	Illumina HiSeq 2500	PAIRED	Healthy	Healthy	Adult	N/A	<23	N/A	N/A	N/A	N/A	N/A	N/A	N/A	N/A	N/A	N/A
Liu (2017)	Gut microbiome and serum metabolome alterations in obesity and after weight-loss intervention	Nature Medicine	PRJEB12123	SAMEA3708566	Illumina HiSeq 2500	PAIRED	Healthy	Healthy	Adult	N/A	<23	N/A	N/A	N/A	N/A	N/A	N/A	N/A	N/A	N/A	N/A
Liu (2017)	Gut microbiome and serum metabolome alterations in obesity and after weight-loss intervention	Nature Medicine	PRJEB12123	SAMEA3708567	Illumina HiSeq 2500	PAIRED	Healthy	Healthy	Adult	N/A	<23	N/A	N/A	N/A	N/A	N/A	N/A	N/A	N/A	N/A	N/A
Liu (2017)	Gut microbiome and serum metabolome alterations in obesity and after weight-loss intervention	Nature Medicine	PRJEB12123	SAMEA3708568	Illumina HiSeq 2500	PAIRED	Healthy	Healthy	Adult	N/A	<23	N/A	N/A	N/A	N/A	N/A	N/A	N/A	N/A	N/A	N/A
Liu (2017)	Gut microbiome and serum metabolome alterations in obesity and after weight-loss intervention	Nature Medicine	PRJEB12123	SAMEA3708569	Illumina HiSeq 2500	PAIRED	Healthy	Healthy	Adult	N/A	<23	N/A	N/A	N/A	N/A	N/A	N/A	N/A	N/A	N/A	N/A
Liu (2017)	Gut microbiome and serum metabolome alterations in obesity and after weight-loss intervention	Nature Medicine	PRJEB12123	SAMEA3708570	Illumina HiSeq 2500	PAIRED	Healthy	Healthy	Adult	N/A	<23	N/A	N/A	N/A	N/A	N/A	N/A	N/A	N/A	N/A	N/A
Liu (2017)	Gut microbiome and serum metabolome alterations in obesity and after weight-loss intervention	Nature Medicine	PRJEB12123	SAMEA3708571	Illumina HiSeq 2500	PAIRED	Healthy	Healthy	Adult	N/A	<23	N/A	N/A	N/A	N/A	N/A	N/A	N/A	N/A	N/A	N/A
Liu (2017)	Gut microbiome and serum metabolome alterations in obesity and after weight-loss intervention	Nature Medicine	PRJEB12123	SAMEA3708572	Illumina HiSeq 2500	PAIRED	Healthy	Healthy	Adult	N/A	<23	N/A	N/A	N/A	N/A	N/A	N/A	N/A	N/A	N/A	N/A
Liu (2017)	Gut microbiome and serum metabolome alterations in obesity and after weight-loss intervention	Nature Medicine	PRJEB12123	SAMEA3708573	Illumina HiSeq 2500	PAIRED	Healthy	Healthy	Adult	N/A	<23	N/A	N/A	N/A	N/A	N/A	N/A	N/A	N/A	N/A	N/A
Liu (2017)	Gut microbiome and serum metabolome alterations in obesity and after weight-loss intervention	Nature Medicine	PRJEB12123	SAMEA3708574	Illumina HiSeq 2500	PAIRED	Healthy	Healthy	Adult	N/A	<23	N/A	N/A	N/A	N/A	N/A	N/A	N/A	N/A	N/A	N/A
Liu (2017)	Gut microbiome and serum metabolome alterations in obesity and after weight-loss intervention	Nature Medicine	PRJEB12123	SAMEA3708575	Illumina HiSeq 2500	PAIRED	Healthy	Healthy	Adult	N/A	<23	N/A	N/A	N/A	N/A	N/A	N/A	N/A	N/A	N/A	N/A
Liu (2017)	Gut microbiome and serum metabolome alterations in obesity and after weight-loss intervention	Nature Medicine	PRJEB12123	SAMEA3708576	Illumina HiSeq 2500	PAIRED	Healthy	Healthy	Adult	N/A	<23	N/A	N/A	N/A	N/A	N/A	N/A	N/A	N/A	N/A	N/A
Liu (2017)	Gut microbiome and serum metabolome alterations in obesity and after weight-loss intervention	Nature Medicine	PRJEB12123	SAMEA3708577	Illumina HiSeq 2500	PAIRED	Healthy	Healthy	Adult	N/A	<23	N/A	N/A	N/A	N/A	N/A	N/A	N/A	N/A	N/A	N/A
Liu (2017)	Gut microbiome and serum metabolome alterations in obesity and after weight-loss intervention	Nature Medicine	PRJEB12123	SAMEA3708578	Illumina HiSeq 2500	PAIRED	Healthy	Healthy	Adult	N/A	<23	N/A	N/A	N/A	N/A	N/A	N/A	N/A	N/A	N/A	N/A
Liu (2017)	Gut microbiome and serum metabolome alterations in obesity and after weight-loss intervention	Nature Medicine	PRJEB12123	SAMEA3708579	Illumina HiSeq 2500	PAIRED	Healthy	Healthy	Adult	N/A	<23	N/A	N/A	N/A	N/A	N/A	N/A	N/A	N/A	N/A	N/A
Liu (2017)	Gut microbiome and serum metabolome alterations in obesity and after weight-loss intervention	Nature Medicine	PRJEB12123	SAMEA3708581	Illumina HiSeq 2500	PAIRED	Healthy	Healthy	Adult	N/A	<23	N/A	N/A	N/A	N/A	N/A	N/A	N/A	N/A	N/A	N/A
Liu (2017)	Gut microbiome and serum metabolome alterations in obesity and after weight-loss intervention	Nature Medicine	PRJEB12123	SAMEA3708582	Illumina HiSeq 2500	PAIRED	Healthy	Healthy	Adult	N/A	<23	N/A	N/A	N/A	N/A	N/A	N/A	N/A	N/A	N/A	N/A
Liu (2017)	Gut microbiome and serum metabolome alterations in obesity and after weight-loss intervention	Nature Medicine	PRJEB12123	SAMEA3708583	Illumina HiSeq 2500	PAIRED	Healthy	Healthy	Adult	N/A	<23	N/A	N/A	N/A	N/A	N/A	N/A	N/A	N/A	N/A	N/A
Liu (2017)	Gut microbiome and serum metabolome alterations in obesity and after weight-loss intervention	Nature Medicine	PRJEB12123	SAMEA3708584	Illumina HiSeq 2500	PAIRED	Healthy	Healthy	Adult	N/A	<23	N/A	N/A	N/A	N/A	N/A	N/A	N/A	N/A	N/A	N/A
Liu (2017)	Gut microbiome and serum metabolome alterations in obesity and after weight-loss intervention	Nature Medicine	PRJEB12123	SAMEA3708585	Illumina HiSeq 2500	PAIRED	Healthy	Healthy	Adult	N/A	<23	N/A	N/A	N/A	N/A	N/A	N/A	N/A	N/A	N/A	N/A
Liu (2017)	Gut microbiome and serum metabolome alterations in obesity and after weight-loss intervention	Nature Medicine	PRJEB12123	SAMEA3708586	Illumina HiSeq 2500	PAIRED	Healthy	Healthy	Adult	N/A	<23	N/A	N/A	N/A	N/A	N/A	N/A	N/A	N/A	N/A	N/A
Liu (2017)	Gut microbiome and serum metabolome alterations in obesity and after weight-loss intervention	Nature Medicine	PRJEB12123	SAMEA3708587	Illumina HiSeq 2500	PAIRED	Healthy	Healthy	Adult	N/A	<23	N/A	N/A	N/A	N/A	N/A	N/A	N/A	N/A	N/A	N/A
Liu (2017)	Gut microbiome and serum metabolome alterations in obesity and after weight-loss intervention	Nature Medicine	PRJEB12123	SAMEA3708588	Illumina HiSeq 2500	PAIRED	Healthy	Healthy	Adult	N/A	<23	N/A	N/A	N/A	N/A	N/A	N/A	N/A	N/A	N/A	N/A
Liu (2017)	Gut microbiome and serum metabolome alterations in obesity and after weight-loss intervention	Nature Medicine	PRJEB12123	SAMEA3708589	Illumina HiSeq 2500	PAIRED	Healthy	Healthy	Adult	N/A	<23	N/A	N/A	N/A	N/A	N/A	N/A	N/A	N/A	N/A	N/A
Liu (2017)	Gut microbiome and serum metabolome alterations in obesity and after weight-loss intervention	Nature Medicine	PRJEB12123	SAMEA3708590	Illumina HiSeq 2500	PAIRED	Healthy	Healthy	Adult	N/A	<23	N/A	N/A	N/A	N/A	N/A	N/A	N/A	N/A	N/A	N/A
Liu (2017)	Gut microbiome and serum metabolome alterations in obesity and after weight-loss intervention	Nature Medicine	PRJEB12123	SAMEA3708591	Illumina HiSeq 2500	PAIRED	Healthy	Healthy	Adult	N/A	<23	N/A	N/A	N/A	N/A	N/A	N/A	N/A	N/A	N/A	N/A
Liu (2017)	Gut microbiome and serum metabolome alterations in obesity and after weight-loss intervention	Nature Medicine	PRJEB12123	SAMEA3708592	Illumina HiSeq 2500	PAIRED	Healthy	Healthy	Adult	N/A	<23	N/A	N/A	N/A	N/A	N/A	N/A	N/A	N/A	N/A	N/A
Liu (2017)	Gut microbiome and serum metabolome alterations in obesity and after weight-loss intervention	Nature Medicine	PRJEB12123	SAMEA3708593	Illumina HiSeq 2500	PAIRED	Healthy	Healthy	Adult	N/A	<23	N/A	N/A	N/A	N/A	N/A	N/A	N/A	N/A	N/A	N/A
Liu (2017)	Gut microbiome and serum metabolome alterations in obesity and after weight-loss intervention	Nature Medicine	PRJEB12123	SAMEA3708594	Illumina HiSeq 2500	PAIRED	Healthy	Healthy	Adult	N/A	<23	N/A	N/A	N/A	N/A	N/A	N/A	N/A	N/A	N/A	N/A
Liu (2017)	Gut microbiome and serum metabolome alterations in obesity and after weight-loss intervention	Nature Medicine	PRJEB12123	SAMEA3708595	Illumina HiSeq 2500	PAIRED	Healthy	Healthy	Adult	N/A	<23	N/A	N/A	N/A	N/A	N/A	N/A	N/A	N/A	N/A	N/A
Liu (2017)	Gut microbiome and serum metabolome alterations in obesity and after weight-loss intervention	Nature Medicine	PRJEB12123	SAMEA3708596	Illumina HiSeq 2500	PAIRED	Healthy	Healthy	Adult	N/A	<23	N/A	N/A	N/A	N/A	N/A	N/A	N/A	N/A	N/A	N/A
Liu (2017)	Gut microbiome and serum metabolome alterations in obesity and after weight-loss intervention	Nature Medicine	PRJEB12123	SAMEA3708597	Illumina HiSeq 2500	PAIRED	Healthy	Healthy	Adult	N/A	<23	N/A	N/A	N/A	N/A	N/A	N/A	N/A	N/A	N/A	N/A
Liu (2017)	Gut microbiome and serum metabolome alterations in obesity and after weight-loss intervention	Nature Medicine	PRJEB12123	SAMEA3708598	Illumina HiSeq 2500	PAIRED	Healthy	Healthy	Adult	N/A	<23	N/A	N/A	N/A	N/A	N/A	N/A	N/A	N/A	N/A	N/A
Liu (2017)	Gut microbiome and serum metabolome alterations in obesity and after weight-loss intervention	Nature Medicine	PRJEB12123	SAMEA3708599	Illumina HiSeq 2500	PAIRED	Healthy	Healthy	Adult	N/A	<23	N/A	N/A	N/A	N/A	N/A	N/A	N/A	N/A	N/A	N/A
Liu (2017)	Gut microbiome and serum metabolome alterations in obesity and after weight-loss intervention	Nature Medicine	PRJEB12123	SAMEA3708600	Illumina HiSeq 2500	PAIRED	Healthy	Healthy	Adult	N/A	<23	N/A	N/A	N/A	N/A	N/A	N/A	N/A	N/A	N/A	N/A
Liu (2017)	Gut microbiome and serum metabolome alterations in obesity and after weight-loss intervention	Nature Medicine	PRJEB12123	SAMEA3708601	Illumina HiSeq 2500	PAIRED	Healthy	Healthy	Adult	N/A	<23	N/A	N/A	N/A	N/A	N/A	N/A	N/A	N/A	N/A	N/A
Liu (2017)	Gut microbiome and serum metabolome alterations in obesity and after weight-loss intervention	Nature Medicine	PRJEB12123	SAMEA3708602	Illumina HiSeq 2500	PAIRED	Healthy	Healthy	Adult	N/A	<23	N/A	N/A	N/A	N/A	N/A	N/A	N/A	N/A	N/A	N/A
Liu (2017)	Gut microbiome and serum metabolome alterations in obesity and after weight-loss intervention	Nature Medicine	PRJEB12123	SAMEA3708603	Illumina HiSeq 2500	PAIRED	Healthy	Healthy	Adult	N/A	<23	N/A	N/A	N/A	N/A	N/A	N/A	N/A	N/A	N/A	N/A
Liu (2017)	Gut microbiome and serum metabolome alterations in obesity and after weight-loss intervention	Nature Medicine	PRJEB12123	SAMEA3708604	Illumina HiSeq 2500	PAIRED	Healthy	Healthy	Adult	N/A	<23	N/A	N/A	N/A	N/A	N/A	N/A	N/A	N/A	N/A	N/A
Liu (2017)	Gut microbiome and serum metabolome alterations in obesity and after weight-loss intervention	Nature Medicine	PRJEB12123	SAMEA3708605	Illumina HiSeq 2500	PAIRED	Healthy	Healthy	Adult	N/A	<23	N/A	N/A	N/A	N/A	N/A	N/A	N/A	N/A	N/A	N/A
Liu (2017)	Gut microbiome and serum metabolome alterations in obesity and after weight-loss intervention	Nature Medicine	PRJEB12123	SAMEA3708606	Illumina HiSeq 2500	PAIRED	Healthy	Healthy	Adult	N/A	<23	N/A	N/A	N/A	N/A	N/A	N/A	N/A	N/A	N/A	N/A
Liu (2017)	Gut microbiome and serum metabolome alterations in obesity and after weight-loss intervention	Nature Medicine	PRJEB12123	SAMEA3708607	Illumina HiSeq 2500	PAIRED	Healthy	Healthy	Adult	N/A	<23	N/A	N/A	N/A	N/A	N/A	N/A	N/A	N/A	N/A	N/A
Liu (2017)	Gut microbiome and serum metabolome alterations in obesity and after weight-loss intervention	Nature Medicine	PRJEB12123	SAMEA3708608	Illumina HiSeq 2500	PAIRED	Healthy	Healthy	Adult	N/A	<23	N/A	N/A	N/A	N/A	N/A	N/A	N/A	N/A	N/A	N/A
Liu (2017)	Gut microbiome and serum metabolome alterations in obesity and after weight-loss intervention	Nature Medicine	PRJEB12123	SAMEA3708609	Illumina HiSeq 2500	PAIRED	Healthy	Healthy	Adult	N/A	<23	N/A	N/A	N/A	N/A	N/A	N/A	N/A	N/A	N/A	N/A
Liu (2017)	Gut microbiome and serum metabolome alterations in obesity and after weight-loss intervention	Nature Medicine	PRJEB12123	SAMEA3708610	Illumina HiSeq 2500	PAIRED	Healthy	Healthy	Adult	N/A	<23	N/A	N/A	N/A	N/A	N/A	N/A	N/A	N/A	N/A	N/A
Liu (2017)	Gut microbiome and serum metabolome alterations in obesity and after weight-loss intervention	Nature Medicine	PRJEB12123	SAMEA3708611	Illumina HiSeq 2500	PAIRED	Healthy	Healthy	Adult	N/A	<23	N/A	N/A	N/A	N/A	N/A	N/A	N/A	N/A	N/A	N/A
Liu (2017)	Gut microbiome and serum metabolome alterations in obesity and after weight-loss intervention	Nature Medicine	PRJEB12123	SAMEA3708612	Illumina HiSeq 2500	PAIRED	Healthy	Healthy	Adult	N/A	<23	N/A	N/A	N/A	N/A	N/A	N/A	N/A	N/A	N/A	N/A
Liu (2017)	Gut microbiome and serum metabolome alterations in obesity and after weight-loss intervention	Nature Medicine	PRJEB12123	SAMEA3708613	Illumina HiSeq 2500	PAIRED	Healthy	Healthy	Adult	N/A	<23	N/A	N/A	N/A	N/A	N/A	N/A	N/A	N/A	N/A	N/A
Liu (2017)	Gut microbiome and serum metabolome alterations in obesity and after weight-loss intervention	Nature Medicine	PRJEB12123	SAMEA3708614	Illumina HiSeq 2500	PAIRED	Healthy	Healthy	Adult	N/A	<23	N/A	N/A	N/A	N/A	N/A	N/A	N/A	N/A	N/A	N/A
Liu (2017)	Gut microbiome and serum metabolome alterations in obesity and after weight-loss intervention	Nature Medicine	PRJEB12123	SAMEA3708615	Illumina HiSeq 2500	PAIRED	Healthy	Healthy	Adult	N/A	<23	N/A	N/A	N/A	N/A	N/A	N/A	N/A	N/A	N/A	N/A
Liu (2017)	Gut microbiome and serum metabolome alterations in obesity and after weight-loss intervention	Nature Medicine	PRJEB12123	SAMEA3708616	Illumina HiSeq 2500	PAIRED	Healthy	Healthy	Adult	N/A	<23	N/A	N/A	N/A	N/A	N/A	N/A	N/A	N/A	N/A	N/A
Liu (2017)	Gut microbiome and serum metabolome alterations in obesity and after weight-loss intervention	Nature Medicine	PRJEB12123	SAMEA3708617	Illumina HiSeq 2500	PAIRED	Healthy	Healthy	Adult	N/A	<23	N/A	N/A	N/A	N/A	N/A	N/A	N/A	N/A	N/A	N/A
Liu (2017)	Gut microbiome and serum metabolome alterations in obesity and after weight-loss intervention	Nature Medicine	PRJEB12123	SAMEA3708618	Illumina HiSeq 2500	PAIRED	Healthy	Healthy	Adult	N/A	<23	N/A	N/A	N/A	N/A	N/A	N/A	N/A	N/A	N/A	N/A
Liu (2017)	Gut microbiome and serum metabolome alterations in obesity and after weight-loss intervention	Nature Medicine	PRJEB12123	SAMEA3708619	Illumina HiSeq 2500	PAIRED	Healthy	Healthy	Adult	N/A	<23	N/A	N/A	N/A	N/A	N/A	N/A	N/A	N/A	N/A	N/A
Liu (2017)	Gut microbiome and serum metabolome alterations in obesity and after weight-loss intervention	Nature Medicine	PRJEB12123	SAMEA3708620	Illumina HiSeq 2500	PAIRED	Healthy	Healthy	Adult	N/A	<23	N/A	N/A	N/A	N/A	N/A	N/A	N/A	N/A	N/A	N/A
Liu (2017)	Gut microbiome and serum metabolome alterations in obesity and after weight-loss intervention	Nature Medicine	PRJEB12123	SAMEA3708621	Illumina HiSeq 2500	PAIRED	Healthy	Healthy	Adult	N/A	<23	N/A	N/A	N/A	N/A	N/A	N/A	N/A	N/A	N/A	N/A
Liu (2017)	Gut microbiome and serum metabolome alterations in obesity and after weight-loss intervention	Nature Medicine	PRJEB12123	SAMEA3708622	Illumina HiSeq 2500	PAIRED	Healthy	Healthy	Adult	N/A	<23	N/A	N/A	N/A	N/A	N/A	N/A	N/A	N/A	N/A	N/A
Liu (2017)	Gut microbiome and serum metabolome alterations in obesity and after weight-loss intervention	Nature Medicine	PRJEB12123	SAMEA3708624	Illumina HiSeq 2500	PAIRED	Healthy	Healthy	Adult	N/A	<23	N/A	N/A	N/A	N/A	N/A	N/A	N/A	N/A	N/A	N/A
Liu (2017)	Gut microbiome and serum metabolome alterations in obesity and after weight-loss intervention	Nature Medicine	PRJEB12123	SAMEA3708625	Illumina HiSeq 2500	PAIRED	Healthy	Healthy	Adult	N/A	<23	N/A	N/A	N/A	N/A	N/A	N/A	N/A	N/A	N/A	N/A
Liu (2017)	Gut microbiome and serum metabolome alterations in obesity and after weight-loss intervention	Nature Medicine	PRJEB12123	SAMEA3708626	Illumina HiSeq 2500	PAIRED	Healthy	Healthy	Adult	N/A	<23	N/A	N/A	N/A	N/A	N/A	N/A	N/A	N/A	N/A	N/A
Liu (2017)	Gut microbiome and serum metabolome alterations in obesity and after weight-loss intervention	Nature Medicine	PRJEB12123	SAMEA3708627	Illumina HiSeq 2500	PAIRED	Healthy	Healthy	Adult	N/A	<23	N/A	N/A	N/A	N/A	N/A	N/A	N/A	N/A	N/A	N/A
Liu (2017)	Gut microbiome and serum metabolome alterations in obesity and after weight-loss intervention	Nature Medicine	PRJEB12123	SAMEA3708628	Illumina HiSeq 2500	PAIRED	Healthy	Healthy	Adult	N/A	<23	N/A	N/A	N/A	N/A	N/A	N/A	N/A	N/A	N/A	N/A
Liu (2017)	Gut microbiome and serum metabolome alterations in obesity and after weight-loss intervention	Nature Medicine	PRJEB12123	SAMEA3708629	Illumina HiSeq 2500	PAIRED	Healthy	Healthy	Adult	N/A	<23	N/A	N/A	N/A	N/A	N/A	N/A	N/A	N/A	N/A	N/A
Liu (2017)	Gut microbiome and serum metabolome alterations in obesity and after weight-loss intervention	Nature Medicine	PRJEB12123	SAMEA3708630	Illumina HiSeq 2500	PAIRED	Healthy	Healthy	Adult	N/A	<23	N/A	N/A	N/A	N/A	N/A	N/A	N/A	N/A	N/A	N/A
Liu (2017)	Gut microbiome and serum metabolome alterations in obesity and after weight-loss intervention	Nature Medicine	PRJEB12123	SAMEA3708631	Illumina HiSeq 2500	PAIRED	Healthy	Healthy	Adult	N/A	<23	N/A	N/A	N/A	N/A	N/A	N/A	N/A	N/A	N/A	N/A
Liu (2017)	Gut microbiome and serum metabolome alterations in obesity and after weight-loss intervention	Nature Medicine	PRJEB12123	SAMEA3708695	Illumina HiSeq 2500	PAIRED	Healthy	Healthy	Adult	N/A	<23	N/A	N/A	N/A	N/A	N/A	N/A	N/A	N/A	N/A	N/A
Liu (2017)	Gut microbiome and serum metabolome alterations in obesity and after weight-loss intervention	Nature Medicine	PRJEB12123	SAMEA3708696	Illumina HiSeq 2500	PAIRED	Healthy	Healthy	Adult	N/A	<23	N/A	N/A	N/A	N/A	N/A	N/A	N/A	N/A	N/A	N/A
Liu (2017)	Gut microbiome and serum metabolome alterations in obesity and after weight-loss intervention	Nature Medicine	PRJEB12123	SAMEA3708697	Illumina HiSeq 2500	PAIRED	Healthy	Healthy	Adult	N/A	<23	N/A	N/A	N/A	N/A	N/A	N/A	N/A	N/A	N/A	N/A
Liu (2017)	Gut microbiome and serum metabolome alterations in obesity and after weight-loss intervention	Nature Medicine	PRJEB12123	SAMEA3708698	Illumina HiSeq 2500	PAIRED	Healthy	Healthy	Adult	N/A	<23	N/A	N/A	N/A	N/A	N/A	N/A	N/A	N/A	N/A	N/A
Liu (2017)	Gut microbiome and serum metabolome alterations in obesity and after weight-loss intervention	Nature Medicine	PRJEB12123	SAMEA3708699	Illumina HiSeq 2500	PAIRED	Healthy	Healthy	Adult	N/A	<23	N/A	N/A	N/A	N/A	N/A	N/A	N/A	N/A	N/A	N/A
Liu (2017)	Gut microbiome and serum metabolome alterations in obesity and after weight-loss intervention	Nature Medicine	PRJEB12123	SAMEA3708700	Illumina HiSeq 2500	PAIRED	Healthy	Healthy	Adult	N/A	<23	N/A	N/A	N/A	N/A	N/A	N/A	N/A	N/A	N/A	N/A
Liu (2017)	Gut microbiome and serum metabolome alterations in obesity and after weight-loss intervention	Nature Medicine	PRJEB12123	SAMEA3708701	Illumina HiSeq 2500	PAIRED	Healthy	Healthy	Adult	N/A	<23	N/A	N/A	N/A	N/A	N/A	N/A	N/A	N/A	N/A	N/A
Liu (2017)	Gut microbiome and serum metabolome alterations in obesity and after weight-loss intervention	Nature Medicine	PRJEB12123	SAMEA3708702	Illumina HiSeq 2500	PAIRED	Healthy	Healthy	Adult	N/A	<23	N/A	N/A	N/A	N/A	N/A	N/A	N/A	N/A	N/A	N/A
Liu (2017)	Gut microbiome and serum metabolome alterations in obesity and after weight-loss intervention	Nature Medicine	PRJEB12123	SAMEA3708704	Illumina HiSeq 2500	PAIRED	Healthy	Healthy	Adult	N/A	<23	N/A	N/A	N/A	N/A	N/A	N/A	N/A	N/A	N/A	N/A
Liu (2017)	Gut microbiome and serum metabolome alterations in obesity and after weight-loss intervention	Nature Medicine	PRJEB12123	SAMEA3708706	Illumina HiSeq 2500	PAIRED	Healthy	Healthy	Adult	N/A	<23	N/A	N/A	N/A	N/A	N/A	N/A	N/A	N/A	N/A	N/A
Liu (2017)	Gut microbiome and serum metabolome alterations in obesity and after weight-loss intervention	Nature Medicine	PRJEB12123	SAMEA3708707	Illumina HiSeq 2500	PAIRED	Healthy	Healthy	Adult	N/A	<23	N/A	N/A	N/A	N/A	N/A	N/A	N/A	N/A	N/A	N/A
Liu (2017)	Gut microbiome and serum metabolome alterations in obesity and after weight-loss intervention	Nature Medicine	PRJEB12123	SAMEA3708708	Illumina HiSeq 2500	PAIRED	Healthy	Healthy	Adult	N/A	<23	N/A	N/A	N/A	N/A	N/A	N/A	N/A	N/A	N/A	N/A
Liu (2017)	Gut microbiome and serum metabolome alterations in obesity and after weight-loss intervention	Nature Medicine	PRJEB12123	SAMEA3708709	Illumina HiSeq 2500	PAIRED	Healthy	Healthy	Adult	N/A	<23	N/A	N/A	N/A	N/A	N/A	N/A	N/A	N/A	N/A	N/A
Liu (2017)	Gut microbiome and serum metabolome alterations in obesity and after weight-loss intervention	Nature Medicine	PRJEB12123	SAMEA3708710	Illumina HiSeq 2500	PAIRED	Healthy	Healthy	Adult	N/A	<23	N/A	N/A	N/A	N/A	N/A	N/A	N/A	N/A	N/A	N/A
Liu (2017)	Gut microbiome and serum metabolome alterations in obesity and after weight-loss intervention	Nature Medicine	PRJEB12123	SAMEA3708711	Illumina HiSeq 2500	PAIRED	Healthy	Healthy	Adult	N/A	<23	N/A	N/A	N/A	N/A	N/A	N/A	N/A	N/A	N/A	N/A
Liu (2017)	Gut microbiome and serum metabolome alterations in obesity and after weight-loss intervention	Nature Medicine	PRJEB12123	SAMEA3708712	Illumina HiSeq 2500	PAIRED	Healthy	Healthy	Adult	N/A	<23	N/A	N/A	N/A	N/A	N/A	N/A	N/A	N/A	N/A	N/A
Liu (2017)	Gut microbiome and serum metabolome alterations in obesity and after weight-loss intervention	Nature Medicine	PRJEB12123	SAMEA3708713	Illumina HiSeq 2500	PAIRED	Healthy	Healthy	Adult	N/A	<23	N/A	N/A	N/A	N/A	N/A	N/A	N/A	N/A	N/A	N/A
Liu (2017)	Gut microbiome and serum metabolome alterations in obesity and after weight-loss intervention	Nature Medicine	PRJEB12123	SAMEA3708714	Illumina HiSeq 2500	PAIRED	Healthy	Healthy	Adult	N/A	<23	N/A	N/A	N/A	N/A	N/A	N/A	N/A	N/A	N/A	N/A
Tanca (2017)	Potential and active functions in the gut microbiota of a healthy human cohort	Microbiome	PRJEB19090	SAMEA53400418	Illimina HiScanSQ	PAIRED	Healthy	Healthy	Adult	N/A	N/A	N/A	N/A	N/A	N/A	N/A	N/A	N/A	N/A	N/A	N/A
Tanca (2017)	Potential and active functions in the gut microbiota of a healthy human cohort	Microbiome	PRJEB19090	SAMEA53401918	Illimina HiScanSQ	PAIRED	Healthy	Healthy	Adult	N/A	N/A	N/A	N/A	N/A	N/A	N/A	N/A	N/A	N/A	N/A	N/A
Tanca (2017)	Potential and active functions in the gut microbiota of a healthy human cohort	Microbiome	PRJEB19090	SAMEA53402668	Illimina HiScanSQ	PAIRED	Healthy	Healthy	Adult	N/A	N/A	N/A	N/A	N/A	N/A	N/A	N/A	N/A	N/A	N/A	N/A
Tanca (2017)	Potential and active functions in the gut microbiota of a healthy human cohort	Microbiome	PRJEB19090	SAMEA53403418	Illimina HiScanSQ	PAIRED	Healthy	Healthy	Adult	N/A	N/A	N/A	N/A	N/A	N/A	N/A	N/A	N/A	N/A	N/A	N/A
Tanca (2017)	Potential and active functions in the gut microbiota of a healthy human cohort	Microbiome	PRJEB19090	SAMEA53404168	Illimina HiScanSQ	PAIRED	Healthy	Healthy	Adult	N/A	N/A	N/A	N/A	N/A	N/A	N/A	N/A	N/A	N/A	N/A	N/A
Tanca (2017)	Potential and active functions in the gut microbiota of a healthy human cohort	Microbiome	PRJEB19090	SAMEA53404918	Illimina HiScanSQ	PAIRED	Healthy	Healthy	Adult	N/A	N/A	N/A	N/A	N/A	N/A	N/A	N/A	N/A	N/A	N/A	N/A
Tanca (2017)	Potential and active functions in the gut microbiota of a healthy human cohort	Microbiome	PRJEB19090	SAMEA53405668	Illimina HiScanSQ	PAIRED	Healthy	Healthy	Adult	N/A	N/A	N/A	N/A	N/A	N/A	N/A	N/A	N/A	N/A	N/A	N/A
Tanca (2017)	Potential and active functions in the gut microbiota of a healthy human cohort	Microbiome	PRJEB19090	SAMEA53406418	Illimina HiScanSQ	PAIRED	Healthy	Healthy	Adult	N/A	N/A	N/A	N/A	N/A	N/A	N/A	N/A	N/A	N/A	N/A	N/A
Tanca (2017)	Potential and active functions in the gut microbiota of a healthy human cohort	Microbiome	PRJEB19090	SAMEA53407168	Illimina HiScanSQ	PAIRED	Healthy	Healthy	Adult	N/A	N/A	N/A	N/A	N/A	N/A	N/A	N/A	N/A	N/A	N/A	N/A
Tanca (2017)	Potential and active functions in the gut microbiota of a healthy human cohort	Microbiome	PRJEB19090	SAMEA53408668	Illimina HiScanSQ	PAIRED	Healthy	Healthy	Adult	N/A	N/A	N/A	N/A	N/A	N/A	N/A	N/A	N/A	N/A	N/A	N/A
Tanca (2017)	Potential and active functions in the gut microbiota of a healthy human cohort	Microbiome	PRJEB19090	SAMEA53409418	Illimina HiScanSQ	PAIRED	Healthy	Healthy	Adult	N/A	N/A	N/A	N/A	N/A	N/A	N/A	N/A	N/A	N/A	N/A	N/A
Tanca (2017)	Potential and active functions in the gut microbiota of a healthy human cohort	Microbiome	PRJEB19090	SAMEA53410168	Illimina HiScanSQ	PAIRED	Healthy	Healthy	Adult	N/A	N/A	N/A	N/A	N/A	N/A	N/A	N/A	N/A	N/A	N/A	N/A
Tanca (2017)	Potential and active functions in the gut microbiota of a healthy human cohort	Microbiome	PRJEB19090	SAMEA53410918	Illimina HiScanSQ	PAIRED	Healthy	Healthy	Adult	N/A	N/A	N/A	N/A	N/A	N/A	N/A	N/A	N/A	N/A	N/A	N/A
Petersen (2017)	Community characteristics of the gut microbiomes of competitive cyclists	Microbiome	PRJNA305507	SAMN04329762	Illumina NextSeq 500	PAIRED	Healthy	Healthy	Adult	Female	N/A	N/A	N/A	N/A	N/A	N/A	11–15 (h/week)	N/A	N/A	N/A	1–5 (alcohol beverages per week)
Petersen (2017)	Community characteristics of the gut microbiomes of competitive cyclists	Microbiome	PRJNA305507	SAMN04329763	Illumina NextSeq 500	PAIRED	Healthy	Healthy	Adult	Male	N/A	N/A	N/A	N/A	N/A	N/A	16–20 (h/week)	N/A	N/A	N/A	6–10 (alcohol beverages per week)
Petersen (2017)	Community characteristics of the gut microbiomes of competitive cyclists	Microbiome	PRJNA305507	SAMN04329764	Illumina NextSeq 500	PAIRED	Healthy	Healthy	Adult	Male	N/A	N/A	N/A	N/A	N/A	N/A	20+ (h/week)	N/A	N/A	N/A	1–5 (alcohol beverages per week)
Petersen (2017)	Community characteristics of the gut microbiomes of competitive cyclists	Microbiome	PRJNA305507	SAMN04329765	Illumina NextSeq 500	PAIRED	Healthy	Healthy	Adult	Female	N/A	N/A	N/A	N/A	N/A	N/A	11–15 (h/week)	N/A	N/A	N/A	No
Petersen (2017)	Community characteristics of the gut microbiomes of competitive cyclists	Microbiome	PRJNA305507	SAMN04329766	Illumina NextSeq 500	PAIRED	Healthy	Healthy	Adult	Male	N/A	N/A	N/A	N/A	N/A	N/A	16–20 (h/week)	N/A	N/A	N/A	1–5 (alcohol beverages per week)
Petersen (2017)	Community characteristics of the gut microbiomes of competitive cyclists	Microbiome	PRJNA305507	SAMN04329767	Illumina NextSeq 500	PAIRED	Healthy	Healthy	Adult	Female	N/A	N/A	N/A	N/A	N/A	N/A	20+ (h/week)	N/A	N/A	N/A	No
Petersen (2017)	Community characteristics of the gut microbiomes of competitive cyclists	Microbiome	PRJNA305507	SAMN04329768	Illumina NextSeq 500	PAIRED	Healthy	Healthy	Adult	Male	N/A	N/A	N/A	N/A	N/A	N/A	11–15 (h/week)	N/A	N/A	N/A	1–5 (alcohol beverages per week)
Petersen (2017)	Community characteristics of the gut microbiomes of competitive cyclists	Microbiome	PRJNA305507	SAMN04329769	Illumina NextSeq 500	PAIRED	Healthy	Healthy	Adult	Male	N/A	N/A	N/A	N/A	N/A	N/A	20+ (h/week)	N/A	N/A	N/A	1–5 (alcohol beverages per week)
Petersen (2017)	Community characteristics of the gut microbiomes of competitive cyclists	Microbiome	PRJNA305507	SAMN04329770	Illumina NextSeq 500	PAIRED	Healthy	Healthy	Adult	Male	N/A	N/A	N/A	N/A	N/A	N/A	16–20 (h/week)	N/A	N/A	N/A	1–5 (alcohol beverages per week)
Petersen (2017)	Community characteristics of the gut microbiomes of competitive cyclists	Microbiome	PRJNA305507	SAMN04329771	Illumina NextSeq 500	PAIRED	Healthy	Healthy	Adult	Female	N/A	N/A	N/A	N/A	N/A	N/A	11–15 (h/week)	N/A	N/A	N/A	No
Petersen (2017)	Community characteristics of the gut microbiomes of competitive cyclists	Microbiome	PRJNA305507	SAMN04329772	Illumina NextSeq 500	PAIRED	Healthy	Healthy	Adult	Male	N/A	N/A	N/A	N/A	N/A	N/A	6–10 (h/week)	N/A	N/A	N/A	1–5 (alcohol beverages per week)
Petersen (2017)	Community characteristics of the gut microbiomes of competitive cyclists	Microbiome	PRJNA305507	SAMN04329773	Illumina NextSeq 500	PAIRED	Healthy	Healthy	Adult	Male	N/A	N/A	N/A	N/A	N/A	N/A	11–15 (h/week)	N/A	N/A	N/A	No
Petersen (2017)	Community characteristics of the gut microbiomes of competitive cyclists	Microbiome	PRJNA305507	SAMN04329774	Illumina NextSeq 500	PAIRED	Healthy	Healthy	Adult	Male	N/A	N/A	N/A	N/A	N/A	N/A	11–15 (h/week)	N/A	N/A	N/A	1–5 (alcohol beverages per week)
Petersen (2017)	Community characteristics of the gut microbiomes of competitive cyclists	Microbiome	PRJNA305507	SAMN04329775	Illumina NextSeq 500	PAIRED	Healthy	Healthy	Adult	Male	N/A	N/A	N/A	N/A	N/A	N/A	11–15 (h/week)	N/A	N/A	N/A	15+ (alcohol beverages per week)
Petersen (2017)	Community characteristics of the gut microbiomes of competitive cyclists	Microbiome	PRJNA305507	SAMN04329776	Illumina NextSeq 500	PAIRED	Healthy	Healthy	Adult	Female	N/A	N/A	N/A	N/A	N/A	N/A	6–10 (h/week)	N/A	N/A	N/A	No
Petersen (2017)	Community characteristics of the gut microbiomes of competitive cyclists	Microbiome	PRJNA305507	SAMN04329777	Illumina NextSeq 500	PAIRED	Healthy	Healthy	Adult	Male	N/A	N/A	N/A	N/A	N/A	N/A	11–15 (h/week)	N/A	N/A	N/A	1–5 (alcohol beverages per week)
Petersen (2017)	Community characteristics of the gut microbiomes of competitive cyclists	Microbiome	PRJNA305507	SAMN04329778	Illumina NextSeq 500	PAIRED	Healthy	Healthy	Adult	Female	N/A	N/A	N/A	N/A	N/A	N/A	11–15 (h/week)	N/A	N/A	N/A	No
Petersen (2017)	Community characteristics of the gut microbiomes of competitive cyclists	Microbiome	PRJNA305507	SAMN04329779	Illumina NextSeq 500	PAIRED	Healthy	Healthy	Adult	Male	N/A	N/A	N/A	N/A	N/A	N/A	11–15 (h/week)	N/A	N/A	N/A	1–5 (alcohol beverages per week)
Petersen (2017)	Community characteristics of the gut microbiomes of competitive cyclists	Microbiome	PRJNA305507	SAMN04329780	Illumina NextSeq 500	PAIRED	Healthy	Healthy	Adult	Male	N/A	N/A	N/A	N/A	N/A	N/A	11–15 (h/week)	N/A	N/A	N/A	1–5 (alcohol beverages per week)
Petersen (2017)	Community characteristics of the gut microbiomes of competitive cyclists	Microbiome	PRJNA305507	SAMN04329781	Illumina NextSeq 500	PAIRED	Healthy	Healthy	Adult	Female	N/A	N/A	N/A	N/A	N/A	N/A	6–10 (h/week)	N/A	N/A	N/A	6–10 (alcohol beverages per week)
Petersen (2017)	Community characteristics of the gut microbiomes of competitive cyclists	Microbiome	PRJNA305507	SAMN04329786	Illumina NextSeq 500	PAIRED	Healthy	Healthy	Adult	Male	N/A	N/A	N/A	N/A	N/A	N/A	6–10 (h/week)	N/A	N/A	N/A	1–5 (alcohol beverages per week)
Petersen (2017)	Community characteristics of the gut microbiomes of competitive cyclists	Microbiome	PRJNA305507	SAMN04329791	Illumina NextSeq 500	PAIRED	Healthy	Healthy	Adult	Male	N/A	N/A	N/A	N/A	N/A	N/A	11–15 (h/week)	N/A	N/A	N/A	1–5 (alcohol beverages per week)
Petersen (2017)	Community characteristics of the gut microbiomes of competitive cyclists	Microbiome	PRJNA305507	SAMN04329796	Illumina NextSeq 500	PAIRED	Healthy	Healthy	Adult	Female	N/A	N/A	N/A	N/A	N/A	N/A	6–10 (h/week)	N/A	N/A	Vegetarian	1–5 (alcohol beverages per week)
Petersen (2017)	Community characteristics of the gut microbiomes of competitive cyclists	Microbiome	PRJNA305507	SAMN04329801	Illumina NextSeq 500	PAIRED	Healthy	Healthy	Adult	Male	N/A	N/A	N/A	N/A	N/A	N/A	6–10 (h/week)	N/A	N/A	N/A	1–5 (alcohol beverages per week)
Petersen (2017)	Community characteristics of the gut microbiomes of competitive cyclists	Microbiome	PRJNA305507	SAMN04329806	Illumina NextSeq 500	PAIRED	Healthy	Healthy	Adult	Female	N/A	N/A	N/A	N/A	N/A	N/A	6–10 (h/week)	N/A	N/A	N/A	1–5 (alcohol beverages per week)
Petersen (2017)	Community characteristics of the gut microbiomes of competitive cyclists	Microbiome	PRJNA305507	SAMN04329811	Illumina NextSeq 500	PAIRED	Healthy	Healthy	Adult	Male	N/A	N/A	N/A	N/A	N/A	N/A	11–15 (h/week)	N/A	N/A	N/A	1–5 (alcohol beverages per week)
Petersen (2017)	Community characteristics of the gut microbiomes of competitive cyclists	Microbiome	PRJNA305507	SAMN04329816	Illumina NextSeq 500	PAIRED	Healthy	Healthy	Adult	Female	N/A	N/A	N/A	N/A	N/A	N/A	16–20 (h/week)	N/A	N/A	N/A	1–5 (alcohol beverages per week)
Petersen (2017)	Community characteristics of the gut microbiomes of competitive cyclists	Microbiome	PRJNA305507	SAMN04329821	Illumina NextSeq 500	PAIRED	Healthy	Healthy	Adult	Male	N/A	N/A	N/A	N/A	N/A	N/A	11–15 (h/week)	N/A	N/A	N/A	No
Petersen (2017)	Community characteristics of the gut microbiomes of competitive cyclists	Microbiome	PRJNA305507	SAMN04329826	Illumina NextSeq 500	PAIRED	Healthy	Healthy	Adult	Male	N/A	N/A	N/A	N/A	N/A	N/A	6–10 (h/week)	N/A	N/A	N/A	No
Petersen (2017)	Community characteristics of the gut microbiomes of competitive cyclists	Microbiome	PRJNA305507	SAMN04329831	Illumina NextSeq 500	PAIRED	Healthy	Healthy	Adult	Male	N/A	N/A	N/A	N/A	N/A	N/A	11–15 (h/week)	N/A	N/A	N/A	No
Petersen (2017)	Community characteristics of the gut microbiomes of competitive cyclists	Microbiome	PRJNA305507	SAMN04329836	Illumina NextSeq 500	PAIRED	Healthy	Healthy	Adult	Male	N/A	N/A	N/A	N/A	N/A	N/A	11–15 (h/week)	N/A	N/A	N/A	1–5 (alcohol beverages per week)
Petersen (2017)	Community characteristics of the gut microbiomes of competitive cyclists	Microbiome	PRJNA305507	SAMN04329841	Illumina NextSeq 500	PAIRED	Healthy	Healthy	Adult	Male	N/A	N/A	N/A	N/A	N/A	N/A	16–20 (h/week)	N/A	N/A	N/A	1–5 (alcohol beverages per week)
Petersen (2017)	Community characteristics of the gut microbiomes of competitive cyclists	Microbiome	PRJNA305507	SAMN04329846	Illumina NextSeq 500	PAIRED	Healthy	Healthy	Adult	Female	N/A	N/A	N/A	N/A	N/A	N/A	11–15 (h/week)	N/A	N/A	N/A	1–5 (alcohol beverages per week)
Nielsen (2014)	Identification and assembly of genomes and genetic elements in complex metagenomic samples without using reference genomes	Nature Biotechnology	PRJEB1220	SAMEA2042285	Illumina Genome Analyzer IIx	PAIRED	Healthy	Healthy	59	Female	22.4	N/A	N/A	N/A	N/A	N/A	N/A	N/A	N/A	N/A	N/A
Nielsen (2014)	Identification and assembly of genomes and genetic elements in complex metagenomic samples without using reference genomes	Nature Biotechnology	PRJEB1220	SAMEA2042362	Illumina Genome Analyzer IIx	PAIRED	Healthy	Healthy	59	Female	22.3	N/A	N/A	N/A	N/A	N/A	N/A	N/A	N/A	N/A	N/A
Nielsen (2014)	Identification and assembly of genomes and genetic elements in complex metagenomic samples without using reference genomes	Nature Biotechnology	PRJEB1220	SAMEA2042199	Illumina Genome Analyzer IIx	PAIRED	Healthy	Healthy	54	Female	19.4	N/A	N/A	N/A	N/A	N/A	N/A	N/A	N/A	N/A	N/A
Nielsen (2014)	Identification and assembly of genomes and genetic elements in complex metagenomic samples without using reference genomes	Nature Biotechnology	PRJEB1220	SAMEA2042202	Illumina Genome Analyzer IIx	PAIRED	Healthy	Healthy	69	Female	23.2	N/A	N/A	N/A	N/A	N/A	N/A	N/A	N/A	N/A	N/A
Nielsen (2014)	Identification and assembly of genomes and genetic elements in complex metagenomic samples without using reference genomes	Nature Biotechnology	PRJEB1220	SAMEA2042205	Illumina Genome Analyzer IIx	PAIRED	Healthy	Healthy	49	Male	20.3	N/A	N/A	N/A	N/A	N/A	N/A	N/A	N/A	N/A	N/A
Nielsen (2014)	Identification and assembly of genomes and genetic elements in complex metagenomic samples without using reference genomes	Nature Biotechnology	PRJEB1220	SAMEA2042292	Illumina Genome Analyzer IIx	PAIRED	Healthy	Healthy	64	Male	23.5	N/A	N/A	N/A	N/A	N/A	N/A	N/A	N/A	N/A	N/A
Nielsen (2014)	Identification and assembly of genomes and genetic elements in complex metagenomic samples without using reference genomes	Nature Biotechnology	PRJEB1220	SAMEA2042384	Illumina Genome Analyzer IIx	PAIRED	Healthy	Healthy	65	Female	20	N/A	N/A	N/A	N/A	N/A	N/A	N/A	N/A	N/A	N/A
Nielsen (2014)	Identification and assembly of genomes and genetic elements in complex metagenomic samples without using reference genomes	Nature Biotechnology	PRJEB1220	SAMEA2042392	Illumina Genome Analyzer IIx	PAIRED	Healthy	Healthy	60	Female	21.6	N/A	N/A	N/A	N/A	N/A	N/A	N/A	N/A	N/A	N/A
Nielsen (2014)	Identification and assembly of genomes and genetic elements in complex metagenomic samples without using reference genomes	Nature Biotechnology	PRJEB1220	SAMEA2042425	Illumina Genome Analyzer IIx	PAIRED	Healthy	Healthy	55	Female	22.5	N/A	N/A	N/A	N/A	N/A	N/A	N/A	N/A	N/A	N/A
Nielsen (2014)	Identification and assembly of genomes and genetic elements in complex metagenomic samples without using reference genomes	Nature Biotechnology	PRJEB1220	SAMEA2042491	Illumina Genome Analyzer IIx	PAIRED	Healthy	Healthy	60	Female	19.6	N/A	N/A	N/A	N/A	N/A	N/A	N/A	N/A	N/A	N/A
Nielsen (2014)	Identification and assembly of genomes and genetic elements in complex metagenomic samples without using reference genomes	Nature Biotechnology	PRJEB1220	SAMEA2042495	Illumina Genome Analyzer IIx	PAIRED	Healthy	Healthy	55	Male	23.1	N/A	N/A	N/A	N/A	N/A	N/A	N/A	N/A	N/A	N/A
Nielsen (2014)	Identification and assembly of genomes and genetic elements in complex metagenomic samples without using reference genomes	Nature Biotechnology	PRJEB1220	SAMEA2042497	Illumina Genome Analyzer IIx	PAIRED	Healthy	Healthy	59	Female	23.9	N/A	N/A	N/A	N/A	N/A	N/A	N/A	N/A	N/A	N/A
Nielsen (2014)	Identification and assembly of genomes and genetic elements in complex metagenomic samples without using reference genomes	Nature Biotechnology	PRJEB1220	SAMEA2042555	Illumina Genome Analyzer IIx	PAIRED	Healthy	Healthy	65	Female	22.1	N/A	N/A	N/A	N/A	N/A	N/A	N/A	N/A	N/A	N/A
Nielsen (2014)	Identification and assembly of genomes and genetic elements in complex metagenomic samples without using reference genomes	Nature Biotechnology	PRJEB1220	SAMEA2042556	Illumina Genome Analyzer IIx	PAIRED	Healthy	Healthy	60	Female	21.2	N/A	N/A	N/A	N/A	N/A	N/A	N/A	N/A	N/A	N/A
Nielsen (2014)	Identification and assembly of genomes and genetic elements in complex metagenomic samples without using reference genomes	Nature Biotechnology	PRJEB1220	SAMEA2042561	Illumina Genome Analyzer IIx	PAIRED	Healthy	Healthy	55	Male	24	N/A	N/A	N/A	N/A	N/A	N/A	N/A	N/A	N/A	N/A
Nielsen (2014)	Identification and assembly of genomes and genetic elements in complex metagenomic samples without using reference genomes	Nature Biotechnology	PRJEB1220	SAMEA2042562	Illumina Genome Analyzer IIx	PAIRED	Healthy	Healthy	45	Female	22.7	N/A	N/A	N/A	N/A	N/A	N/A	N/A	N/A	N/A	N/A
Nielsen (2014)	Identification and assembly of genomes and genetic elements in complex metagenomic samples without using reference genomes	Nature Biotechnology	PRJEB1220	SAMEA2042564	Illumina Genome Analyzer IIx	PAIRED	Healthy	Healthy	70	Male	22.6	N/A	N/A	N/A	N/A	N/A	N/A	N/A	N/A	N/A	N/A
Nielsen (2014)	Identification and assembly of genomes and genetic elements in complex metagenomic samples without using reference genomes	Nature Biotechnology	PRJEB1220	SAMEA1973207	Illumina Genome Analyzer IIx	PAIRED	Healthy	Healthy	45	Male	23	N/A	N/A	N/A	N/A	N/A	N/A	N/A	N/A	N/A	N/A
Nielsen (2014)	Identification and assembly of genomes and genetic elements in complex metagenomic samples without using reference genomes	Nature Biotechnology	PRJEB1220	SAMEA2042729	Illumina Genome Analyzer IIx	PAIRED	Healthy	Healthy	50	Female	24.5	N/A	N/A	N/A	N/A	N/A	N/A	N/A	N/A	N/A	N/A
Nielsen (2014)	Identification and assembly of genomes and genetic elements in complex metagenomic samples without using reference genomes	Nature Biotechnology	PRJEB1220	SAMEA2042731	Illumina Genome Analyzer IIx	PAIRED	Healthy	Healthy	59	Female	21.9	N/A	N/A	N/A	N/A	N/A	N/A	N/A	N/A	N/A	N/A
Nielsen (2014)	Identification and assembly of genomes and genetic elements in complex metagenomic samples without using reference genomes	Nature Biotechnology	PRJEB1220	SAMEA2042732	Illumina Genome Analyzer IIx	PAIRED	Healthy	Healthy	60	Female	24.4	N/A	N/A	N/A	N/A	N/A	N/A	N/A	N/A	N/A	N/A
Nielsen (2014)	Identification and assembly of genomes and genetic elements in complex metagenomic samples without using reference genomes	Nature Biotechnology	PRJEB1220	SAMEA2042734	Illumina Genome Analyzer IIx	PAIRED	Healthy	Healthy	55	Female	22.7	N/A	N/A	N/A	N/A	N/A	N/A	N/A	N/A	N/A	N/A
Nielsen (2014)	Identification and assembly of genomes and genetic elements in complex metagenomic samples without using reference genomes	Nature Biotechnology	PRJEB1220	SAMEA2042737	Illumina Genome Analyzer IIx	PAIRED	Healthy	Healthy	55	Female	23.3	N/A	N/A	N/A	N/A	N/A	N/A	N/A	N/A	N/A	N/A
Nielsen (2014)	Identification and assembly of genomes and genetic elements in complex metagenomic samples without using reference genomes	Nature Biotechnology	PRJEB1220	SAMEA2041924	Illumina Genome Analyzer IIx	PAIRED	Healthy	Healthy	22	Female	N/A	N/A	N/A	N/A	N/A	N/A	N/A	N/A	N/A	N/A	N/A
Nielsen (2014)	Identification and assembly of genomes and genetic elements in complex metagenomic samples without using reference genomes	Nature Biotechnology	PRJEB1220	SAMEA2041928	Illumina Genome Analyzer IIx	PAIRED	Healthy	Healthy	24	Male	N/A	N/A	N/A	N/A	N/A	N/A	N/A	N/A	N/A	N/A	N/A
Nielsen (2014)	Identification and assembly of genomes and genetic elements in complex metagenomic samples without using reference genomes	Nature Biotechnology	PRJEB1220	SAMEA2041931	Illumina Genome Analyzer IIx	PAIRED	Healthy	Healthy	32	Female	N/A	N/A	N/A	N/A	N/A	N/A	N/A	N/A	N/A	N/A	N/A
Nielsen (2014)	Identification and assembly of genomes and genetic elements in complex metagenomic samples without using reference genomes	Nature Biotechnology	PRJEB1220	SAMEA2041933	Illumina Genome Analyzer IIx	PAIRED	Healthy	Healthy	N/A	Female	N/A	N/A	N/A	N/A	N/A	N/A	N/A	N/A	N/A	N/A	N/A
Nielsen (2014)	Identification and assembly of genomes and genetic elements in complex metagenomic samples without using reference genomes	Nature Biotechnology	PRJEB1220	SAMEA2041935	Illumina Genome Analyzer IIx	PAIRED	Healthy	Healthy	21	Male	N/A	N/A	N/A	N/A	N/A	N/A	N/A	N/A	N/A	N/A	N/A
Nielsen (2014)	Identification and assembly of genomes and genetic elements in complex metagenomic samples without using reference genomes	Nature Biotechnology	PRJEB1220	SAMEA2041937	Illumina Genome Analyzer IIx	PAIRED	Healthy	Healthy	20	Male	N/A	N/A	N/A	N/A	N/A	N/A	N/A	N/A	N/A	N/A	N/A
Nielsen (2014)	Identification and assembly of genomes and genetic elements in complex metagenomic samples without using reference genomes	Nature Biotechnology	PRJEB1220	SAMEA2041939	Illumina Genome Analyzer IIx	PAIRED	Healthy	Healthy	44	Female	N/A	N/A	N/A	N/A	N/A	N/A	N/A	N/A	N/A	N/A	N/A
Nielsen (2014)	Identification and assembly of genomes and genetic elements in complex metagenomic samples without using reference genomes	Nature Biotechnology	PRJEB1220	SAMEA2042000	Illumina Genome Analyzer IIx	PAIRED	Healthy	Healthy	29	Male	N/A	N/A	N/A	N/A	N/A	N/A	N/A	N/A	N/A	N/A	N/A
Nielsen (2014)	Identification and assembly of genomes and genetic elements in complex metagenomic samples without using reference genomes	Nature Biotechnology	PRJEB1220	SAMEA2042002	Illumina Genome Analyzer IIx	PAIRED	Healthy	Healthy	29	Male	N/A	N/A	N/A	N/A	N/A	N/A	N/A	N/A	N/A	N/A	N/A
Nielsen (2014)	Identification and assembly of genomes and genetic elements in complex metagenomic samples without using reference genomes	Nature Biotechnology	PRJEB1220	SAMEA2042006	Illumina Genome Analyzer IIx	PAIRED	Healthy	Healthy	41	Male	N/A	N/A	N/A	N/A	N/A	N/A	N/A	N/A	N/A	N/A	N/A
Nielsen (2014)	Identification and assembly of genomes and genetic elements in complex metagenomic samples without using reference genomes	Nature Biotechnology	PRJEB1220	SAMEA2042009	Illumina Genome Analyzer IIx	PAIRED	Healthy	Healthy	35	Male	N/A	N/A	N/A	N/A	N/A	N/A	N/A	N/A	N/A	N/A	N/A
Nielsen (2014)	Identification and assembly of genomes and genetic elements in complex metagenomic samples without using reference genomes	Nature Biotechnology	PRJEB1220	SAMEA2042104	Illumina Genome Analyzer IIx	PAIRED	Healthy	Healthy	68	Female	21.6128	N/A	N/A	N/A	N/A	N/A	N/A	N/A	N/A	N/A	N/A
Nielsen (2014)	Identification and assembly of genomes and genetic elements in complex metagenomic samples without using reference genomes	Nature Biotechnology	PRJEB1220	SAMEA2042114	Illumina Genome Analyzer IIx	PAIRED	Healthy	Healthy	68	Male	24.2424	N/A	N/A	N/A	N/A	N/A	N/A	N/A	N/A	N/A	N/A
Nielsen (2014)	Identification and assembly of genomes and genetic elements in complex metagenomic samples without using reference genomes	Nature Biotechnology	PRJEB1220	SAMEA2042115	Illumina Genome Analyzer IIx	PAIRED	Healthy	Healthy	41	Female	20.5761	N/A	N/A	N/A	N/A	N/A	N/A	N/A	N/A	N/A	N/A
Nielsen (2014)	Identification and assembly of genomes and genetic elements in complex metagenomic samples without using reference genomes	Nature Biotechnology	PRJEB1220	SAMEA2042217	Illumina Genome Analyzer IIx	PAIRED	Healthy	Healthy	36	Male	24.811	N/A	N/A	N/A	N/A	N/A	N/A	N/A	N/A	N/A	N/A
Nielsen (2014)	Identification and assembly of genomes and genetic elements in complex metagenomic samples without using reference genomes	Nature Biotechnology	PRJEB1220	SAMEA2042218	Illumina Genome Analyzer IIx	PAIRED	Healthy	Healthy	24	Male	21.4619	N/A	N/A	N/A	N/A	N/A	N/A	N/A	N/A	N/A	N/A
Nielsen (2014)	Identification and assembly of genomes and genetic elements in complex metagenomic samples without using reference genomes	Nature Biotechnology	PRJEB1220	SAMEA2042221	Illumina Genome Analyzer IIx	PAIRED	Healthy	Healthy	59	Female	19.8177	N/A	N/A	N/A	N/A	N/A	N/A	N/A	N/A	N/A	N/A
Nielsen (2014)	Identification and assembly of genomes and genetic elements in complex metagenomic samples without using reference genomes	Nature Biotechnology	PRJEB1220	SAMEA2042222	Illumina Genome Analyzer IIx	PAIRED	Healthy	Healthy	28	Female	22.5981	N/A	N/A	N/A	N/A	N/A	N/A	N/A	N/A	N/A	N/A
Nielsen (2014)	Identification and assembly of genomes and genetic elements in complex metagenomic samples without using reference genomes	Nature Biotechnology	PRJEB1220	SAMEA2042223	Illumina Genome Analyzer IIx	PAIRED	Healthy	Healthy	54	Female	23.6128	N/A	N/A	N/A	N/A	N/A	N/A	N/A	N/A	N/A	N/A
Nielsen (2014)	Identification and assembly of genomes and genetic elements in complex metagenomic samples without using reference genomes	Nature Biotechnology	PRJEB1220	SAMEA2042226	Illumina Genome Analyzer IIx	PAIRED	Healthy	Healthy	20	Male	22.0384	N/A	N/A	N/A	N/A	N/A	N/A	N/A	N/A	N/A	N/A
Nielsen (2014)	Identification and assembly of genomes and genetic elements in complex metagenomic samples without using reference genomes	Nature Biotechnology	PRJEB1220	SAMEA2042396	Illumina Genome Analyzer IIx	PAIRED	Healthy	Healthy	48	Male	24.8163	N/A	N/A	N/A	N/A	N/A	N/A	N/A	N/A	N/A	N/A
Nielsen (2014)	Identification and assembly of genomes and genetic elements in complex metagenomic samples without using reference genomes	Nature Biotechnology	PRJEB1220	SAMEA2042444	Illumina Genome Analyzer IIx	PAIRED	Healthy	Healthy	25	Male	23.8751	N/A	N/A	N/A	N/A	N/A	N/A	N/A	N/A	N/A	N/A
Nielsen (2014)	Identification and assembly of genomes and genetic elements in complex metagenomic samples without using reference genomes	Nature Biotechnology	PRJEB1220	SAMEA2042511	Illumina Genome Analyzer IIx	PAIRED	Healthy	Healthy	61	Female	24.5578	N/A	N/A	N/A	N/A	N/A	N/A	N/A	N/A	N/A	N/A
Nielsen (2014)	Identification and assembly of genomes and genetic elements in complex metagenomic samples without using reference genomes	Nature Biotechnology	PRJEB1220	SAMEA2042512	Illumina Genome Analyzer IIx	PAIRED	Healthy	Healthy	46	Male	24.3827	N/A	N/A	N/A	N/A	N/A	N/A	N/A	N/A	N/A	N/A
Nielsen (2014)	Identification and assembly of genomes and genetic elements in complex metagenomic samples without using reference genomes	Nature Biotechnology	PRJEB1220	SAMEA2042516	Illumina Genome Analyzer IIx	PAIRED	Healthy	Healthy	41	Female	23.255	N/A	N/A	N/A	N/A	N/A	N/A	N/A	N/A	N/A	N/A
Nielsen (2014)	Identification and assembly of genomes and genetic elements in complex metagenomic samples without using reference genomes	Nature Biotechnology	PRJEB1220	SAMEA2042570	Illumina Genome Analyzer IIx	PAIRED	Healthy	Healthy	31	Male	23.0518	N/A	N/A	N/A	N/A	N/A	N/A	N/A	N/A	N/A	N/A
Nielsen (2014)	Identification and assembly of genomes and genetic elements in complex metagenomic samples without using reference genomes	Nature Biotechnology	PRJEB1220	SAMEA2042573	Illumina Genome Analyzer IIx	PAIRED	Healthy	Healthy	34	Female	20.4294	N/A	N/A	N/A	N/A	N/A	N/A	N/A	N/A	N/A	N/A
Nielsen (2014)	Identification and assembly of genomes and genetic elements in complex metagenomic samples without using reference genomes	Nature Biotechnology	PRJEB1220	SAMEA2042574	Illumina Genome Analyzer IIx	PAIRED	Healthy	Healthy	19	Male	23.9869	N/A	N/A	N/A	N/A	N/A	N/A	N/A	N/A	N/A	N/A
Nielsen (2014)	Identification and assembly of genomes and genetic elements in complex metagenomic samples without using reference genomes	Nature Biotechnology	PRJEB1220	SAMEA2042580	Illumina Genome Analyzer IIx	PAIRED	Healthy	Healthy	54	Female	23.9188	N/A	N/A	N/A	N/A	N/A	N/A	N/A	N/A	N/A	N/A
Nielsen (2014)	Identification and assembly of genomes and genetic elements in complex metagenomic samples without using reference genomes	Nature Biotechnology	PRJEB1220	SAMEA2042581	Illumina Genome Analyzer IIx	PAIRED	Healthy	Healthy	32	Female	19.563	N/A	N/A	N/A	N/A	N/A	N/A	N/A	N/A	N/A	N/A
Nielsen (2014)	Identification and assembly of genomes and genetic elements in complex metagenomic samples without using reference genomes	Nature Biotechnology	PRJEB1220	SAMEA2042583	Illumina Genome Analyzer IIx	PAIRED	Healthy	Healthy	20	Male	20.2865	N/A	N/A	N/A	N/A	N/A	N/A	N/A	N/A	N/A	N/A
Nielsen (2014)	Identification and assembly of genomes and genetic elements in complex metagenomic samples without using reference genomes	Nature Biotechnology	PRJEB1220	SAMEA2042619	Illumina Genome Analyzer IIx	PAIRED	Healthy	Healthy	26	Male	20.9024	N/A	N/A	N/A	N/A	N/A	N/A	N/A	N/A	N/A	N/A
Nielsen (2014)	Identification and assembly of genomes and genetic elements in complex metagenomic samples without using reference genomes	Nature Biotechnology	PRJEB1220	SAMEA2042661	Illumina Genome Analyzer IIx	PAIRED	Healthy	Healthy	32	Female	19.9792	N/A	N/A	N/A	N/A	N/A	N/A	N/A	N/A	N/A	N/A
Nielsen (2014)	Identification and assembly of genomes and genetic elements in complex metagenomic samples without using reference genomes	Nature Biotechnology	PRJEB1220	SAMEA2042662	Illumina Genome Analyzer IIx	PAIRED	Healthy	Healthy	38	Female	23.1834	N/A	N/A	N/A	N/A	N/A	N/A	N/A	N/A	N/A	N/A
Nielsen (2014)	Identification and assembly of genomes and genetic elements in complex metagenomic samples without using reference genomes	Nature Biotechnology	PRJEB1220	SAMEA1972229	Illumina Genome Analyzer IIx	PAIRED	Healthy	Healthy	37	Female	22.5827	N/A	N/A	N/A	N/A	N/A	N/A	N/A	N/A	N/A	N/A
Obregon-Tito (2015)	Subsistence strategies in traditional societies distinguish gut microbiomes	Nature Communications	PRJNA268964	SAMN03283239	Illumina HiSeq 2500	PAIRED	Healthy	Healthy	13	N/A	18.77	N/A	N/A	N/A	N/A	N/A	N/A	N/A	N/A	N/A	N/A
Obregon-Tito (2015)	Subsistence strategies in traditional societies distinguish gut microbiomes	Nature Communications	PRJNA268964	SAMN03283240	Illumina HiSeq 2500	PAIRED	Healthy	Healthy	36	Male	23.05	N/A	N/A	N/A	N/A	N/A	N/A	N/A	N/A	N/A	N/A
Obregon-Tito (2015)	Subsistence strategies in traditional societies distinguish gut microbiomes	Nature Communications	PRJNA268964	SAMN03283245	Illumina HiSeq 2500	PAIRED	Healthy	Healthy	26	Female	19.53	N/A	N/A	N/A	N/A	N/A	N/A	N/A	N/A	N/A	N/A
Obregon-Tito (2015)	Subsistence strategies in traditional societies distinguish gut microbiomes	Nature Communications	PRJNA268964	SAMN03283250	Illumina HiSeq 2500	PAIRED	Healthy	Healthy	37	Female	20.52	N/A	N/A	N/A	N/A	N/A	N/A	N/A	N/A	N/A	N/A
Obregon-Tito (2015)	Subsistence strategies in traditional societies distinguish gut microbiomes	Nature Communications	PRJNA268964	SAMN03283251	Illumina HiSeq 2500	PAIRED	Healthy	Healthy	40	Male	23.37	N/A	N/A	N/A	N/A	N/A	N/A	N/A	N/A	N/A	N/A
Obregon-Tito (2015)	Subsistence strategies in traditional societies distinguish gut microbiomes	Nature Communications	PRJNA268964	SAMN03283252	Illumina HiSeq 2500	PAIRED	Healthy	Healthy	26	Male	24.16	N/A	N/A	N/A	N/A	N/A	N/A	N/A	N/A	N/A	N/A
Obregon-Tito (2015)	Subsistence strategies in traditional societies distinguish gut microbiomes	Nature Communications	PRJNA268964	SAMN03283253	Illumina HiSeq 2500	PAIRED	Healthy	Healthy	28	Male	22.19	N/A	N/A	N/A	N/A	N/A	N/A	N/A	N/A	N/A	N/A
Obregon-Tito (2015)	Subsistence strategies in traditional societies distinguish gut microbiomes	Nature Communications	PRJNA268964	SAMN03283254	Illumina HiSeq 2500	PAIRED	Healthy	Healthy	28	Male	23.49	N/A	N/A	N/A	N/A	N/A	N/A	N/A	N/A	N/A	N/A
Obregon-Tito (2015)	Subsistence strategies in traditional societies distinguish gut microbiomes	Nature Communications	PRJNA268964	SAMN03283255	Illumina HiSeq 2500	PAIRED	Healthy	Healthy	32	Female	20.01	N/A	N/A	N/A	N/A	N/A	N/A	N/A	N/A	N/A	N/A
Obregon-Tito (2015)	Subsistence strategies in traditional societies distinguish gut microbiomes	Nature Communications	PRJNA268964	SAMN03283256	Illumina HiSeq 2500	PAIRED	Healthy	Healthy	34	Female	23.77	N/A	N/A	N/A	N/A	N/A	N/A	N/A	N/A	N/A	N/A
Obregon-Tito (2015)	Subsistence strategies in traditional societies distinguish gut microbiomes	Nature Communications	PRJNA268964	SAMN03283258	Illumina HiSeq 2500	PAIRED	Healthy	Healthy	26	Male	23.93	N/A	N/A	N/A	N/A	N/A	N/A	N/A	N/A	N/A	N/A
Obregon-Tito (2015)	Subsistence strategies in traditional societies distinguish gut microbiomes	Nature Communications	PRJNA268964	SAMN03283260	Illumina HiSeq 2500	PAIRED	Healthy	Healthy	35	Male	20.34	N/A	N/A	N/A	N/A	N/A	N/A	N/A	N/A	N/A	N/A
Obregon-Tito (2015)	Subsistence strategies in traditional societies distinguish gut microbiomes	Nature Communications	PRJNA268964	SAMN03283266	Illumina HiSeq 2500	PAIRED	Healthy	Healthy	32	Female	19.3	N/A	N/A	N/A	N/A	N/A	N/A	N/A	N/A	N/A	N/A
Obregon-Tito (2015)	Subsistence strategies in traditional societies distinguish gut microbiomes	Nature Communications	PRJNA268964	SAMN03283268	Illumina HiSeq 2500	PAIRED	Healthy	Healthy	23	Male	24.78	N/A	N/A	N/A	N/A	N/A	N/A	N/A	N/A	N/A	N/A
Obregon-Tito (2015)	Subsistence strategies in traditional societies distinguish gut microbiomes	Nature Communications	PRJNA268964	SAMN03283272	Illumina HiSeq 2500	PAIRED	Healthy	Healthy	25	Female	23.95	N/A	N/A	N/A	N/A	N/A	N/A	N/A	N/A	N/A	N/A
Obregon-Tito (2015)	Subsistence strategies in traditional societies distinguish gut microbiomes	Nature Communications	PRJNA268964	SAMN03283277	Illumina HiSeq 2500	PAIRED	Healthy	Healthy	20	Female	21.27	N/A	N/A	N/A	N/A	N/A	N/A	N/A	N/A	N/A	N/A
Obregon-Tito (2015)	Subsistence strategies in traditional societies distinguish gut microbiomes	Nature Communications	PRJNA268964	SAMN03283284	Illumina HiSeq 2500	PAIRED	Healthy	Healthy	30	Male	22.6	N/A	N/A	N/A	N/A	N/A	N/A	N/A	N/A	N/A	N/A
Obregon-Tito (2015)	Subsistence strategies in traditional societies distinguish gut microbiomes	Nature Communications	PRJNA268964	SAMN03283285	Illumina HiSeq 2500	PAIRED	Healthy	Healthy	21	Female	22.14	N/A	N/A	N/A	N/A	N/A	N/A	N/A	N/A	N/A	N/A
Obregon-Tito (2015)	Subsistence strategies in traditional societies distinguish gut microbiomes	Nature Communications	PRJNA268964	SAMN03283288	Illumina HiSeq 2500	PAIRED	Healthy	Healthy	12	Male	19.84	N/A	N/A	N/A	N/A	N/A	N/A	N/A	N/A	N/A	N/A
Obregon-Tito (2015)	Subsistence strategies in traditional societies distinguish gut microbiomes	Nature Communications	PRJNA268964	SAMN03283290	Illumina HiSeq 2500	PAIRED	Healthy	Healthy	18	Female	22.72	N/A	N/A	N/A	N/A	N/A	N/A	N/A	N/A	N/A	N/A
Feng (2015)	Gut microbiome development along the colorectal adenoma–carcinoma sequence	Nature Communications	PRJEB7774	SAMEA3136638	Illumina HiSeq 2000	PAIRED	Healthy	Healthy	60	Female	22.1	5.1	0.6	3.1	N/A	1.5	Yes	No	N/A	Yes	N/A
Feng (2015)	Gut microbiome development along the colorectal adenoma–carcinoma sequence	Nature Communications	PRJEB7774	SAMEA3136670	Illumina HiSeq 2000	PAIRED	Healthy	Healthy	68	Male	23.45	5.1	2.9	5.9	N/A	1	Yes	Yes	N/A	Yes	N/A
Feng (2015)	Gut microbiome development along the colorectal adenoma–carcinoma sequence	Nature Communications	PRJEB7774	SAMEA3136674	Illumina HiSeq 2000	PAIRED	Healthy	Healthy	70	Male	22.64	5.1	0.9	3.9	N/A	1.4	Yes	Yes	N/A	Yes	N/A
Feng (2015)	Gut microbiome development along the colorectal adenoma–carcinoma sequence	Nature Communications	PRJEB7774	SAMEA3136676	Illumina HiSeq 2000	PAIRED	Healthy	Healthy	67	Male	22.79	4.7	1.7	4.3	N/A	1.4	Yes	No	N/A	Yes	N/A
Feng (2015)	Gut microbiome development along the colorectal adenoma–carcinoma sequence	Nature Communications	PRJEB7774	SAMEA3136644	Illumina HiSeq 2000	PAIRED	Healthy	Healthy	68	Female	21.7	4.8	1.1	4.5	N/A	2.2	Yes	No	N/A	Yes	N/A
Feng (2015)	Gut microbiome development along the colorectal adenoma–carcinoma sequence	Nature Communications	PRJEB7774	SAMEA3136673	Illumina HiSeq 2000	PAIRED	Healthy	Healthy	68	Male	22.2	5.8	1	3.3	N/A	1.8	Yes	No	N/A	Yes	N/A
Feng (2015)	Gut microbiome development along the colorectal adenoma–carcinoma sequence	Nature Communications	PRJEB7774	SAMEA3136668	Illumina HiSeq 2000	PAIRED	Healthy	Healthy	67	Male	23.14	4.7	1.8	3.5	N/A	0.9	Yes	Yes	N/A	Yes	N/A
Feng (2015)	Gut microbiome development along the colorectal adenoma–carcinoma sequence	Nature Communications	PRJEB7774	SAMEA3136645	Illumina HiSeq 2000	PAIRED	Healthy	Healthy	66	Female	21.7	5.3	0.9	3.2	N/A	2.3	Yes	Yes	N/A	Yes	N/A
Feng (2015)	Gut microbiome development along the colorectal adenoma–carcinoma sequence	Nature Communications	PRJEB7774	SAMEA3136646	Illumina HiSeq 2000	PAIRED	Healthy	Healthy	69	Female	22.4	5.7	0.8	4.9	N/A	2.3	No	No	N/A	Yes	N/A
Feng (2015)	Gut microbiome development along the colorectal adenoma–carcinoma sequence	Nature Communications	PRJEB7774	SAMEA3136675	Illumina HiSeq 2000	PAIRED	Healthy	Healthy	64	Male	22.78	6.1	1.1	2.2	N/A	1.7	Yes	No	N/A	Yes	N/A
Feng (2015)	Gut microbiome development along the colorectal adenoma–carcinoma sequence	Nature Communications	PRJEB7774	SAMEA3136639	Illumina HiSeq 2000	PAIRED	Healthy	Healthy	68	Female	22.1	5.6	0.7	4	N/A	2.9	Yes	No	N/A	Yes	N/A
Feng (2015)	Gut microbiome development along the colorectal adenoma–carcinoma sequence	Nature Communications	PRJEB7774	SAMEA3136640	Illumina HiSeq 2000	PAIRED	Healthy	Healthy	68	Female	22.4	5.1	0.9	3.2	N/A	1.7	Yes	No	N/A	Yes	N/A
Feng (2015)	Gut microbiome development along the colorectal adenoma–carcinoma sequence	Nature Communications	PRJEB7774	SAMEA3136672	Illumina HiSeq 2000	PAIRED	Healthy	Healthy	65	Male	22.03	4.5	1.3	5	N/A	2	Yes	No	N/A	No	N/A
Feng (2015)	Gut microbiome development along the colorectal adenoma–carcinoma sequence	Nature Communications	PRJEB7774	SAMEA3136642	Illumina HiSeq 2000	PAIRED	Healthy	Healthy	70	Female	22.67	6.7	1.2	3.9	N/A	2	Yes	Yes	N/A	Yes	N/A
Feng (2015)	Gut microbiome development along the colorectal adenoma–carcinoma sequence	Nature Communications	PRJEB7774	SAMEA3136671	Illumina HiSeq 2000	PAIRED	Healthy	Healthy	70	Male	23.67	5.2	1.6	4.1	N/A	1	Yes	Yes	N/A	Yes	N/A
Feng (2015)	Gut microbiome development along the colorectal adenoma–carcinoma sequence	Nature Communications	PRJEB7774	SAMEA3136643	Illumina HiSeq 2000	PAIRED	Healthy	Healthy	70	Female	22.8	4.8	0.8	3.3	N/A	2.3	No	No	N/A	No	N/A
Feng (2015)	Gut microbiome development along the colorectal adenoma–carcinoma sequence	Nature Communications	PRJEB7774	SAMEA3136641	Illumina HiSeq 2000	PAIRED	Healthy	Healthy	67	Female	22.58	5.8	2.9	6.4	N/A	1.3	Yes	No	N/A	Yes	N/A
Feng (2015)	Gut microbiome development along the colorectal adenoma–carcinoma sequence	Nature Communications	PRJEB7774	SAMEA3136637	Illumina HiSeq 2000	PAIRED	Healthy	Healthy	62	Female	22.1	6.4	1	2.8	N/A	1.4	Yes	Yes	N/A	Yes	N/A
Feng (2015)	Gut microbiome development along the colorectal adenoma–carcinoma sequence	Nature Communications	PRJEB7774	SAMEA3136669	Illumina HiSeq 2000	PAIRED	Healthy	Healthy	46	Male	23.15	5.8	0.8	2.5	N/A	1.5	Yes	Yes	N/A	Yes	N/A
Feng (2015)	Gut microbiome development along the colorectal adenoma–carcinoma sequence	Nature Communications	PRJEB7774	SAMEA3178939	Illumina HiSeq 2000	PAIRED	Healthy	Healthy	68	Male	23.5294	5.8	0.9	4.1	N/A	1.7	Yes	No	N/A	Yes	N/A
Feng (2015)	Gut microbiome development along the colorectal adenoma–carcinoma sequence	Nature Communications	PRJEB7774	SAMEA3178943	Illumina HiSeq 2000	PAIRED	Healthy	Healthy	43	Female	22.6474	5.4	0.6	3.4	N/A	2.1	Yes	No	N/A	Yes	N/A
Lim (2014)	Stability of Gut Enterotypes in Korean Monozygotic Twins and Their Association with Biomarkers and Diet	Scientific Reports	PRJEB1690	SAMEA2017457	Illumina HiSeq 2000	PAIRED	Healthy	Healthy	Adult	N/A	N/A	N/A	N/A	N/A	N/A	N/A	N/A	N/A	N/A	N/A	N/A
Lim (2014)	Stability of Gut Enterotypes in Korean Monozygotic Twins and Their Association with Biomarkers and Diet	Scientific Reports	PRJEB1690	SAMEA2017459	Illumina HiSeq 2000	PAIRED	Healthy	Healthy	Adult	N/A	N/A	N/A	N/A	N/A	N/A	N/A	N/A	N/A	N/A	N/A	N/A
Lim (2014)	Stability of Gut Enterotypes in Korean Monozygotic Twins and Their Association with Biomarkers and Diet	Scientific Reports	PRJEB1690	SAMEA2055108	Illumina HiSeq 2000	PAIRED	Healthy	Healthy	Adult	N/A	N/A	N/A	N/A	N/A	N/A	N/A	N/A	N/A	N/A	N/A	N/A
Lim (2014)	Stability of Gut Enterotypes in Korean Monozygotic Twins and Their Association with Biomarkers and Diet	Scientific Reports	PRJEB1690	SAMEA2055266	Illumina HiSeq 2000	PAIRED	Healthy	Healthy	Adult	N/A	N/A	N/A	N/A	N/A	N/A	N/A	N/A	N/A	N/A	N/A	N/A
Lim (2014)	Stability of Gut Enterotypes in Korean Monozygotic Twins and Their Association with Biomarkers and Diet	Scientific Reports	PRJEB1690	SAMEA2055268	Illumina HiSeq 2000	PAIRED	Healthy	Healthy	Adult	N/A	N/A	N/A	N/A	N/A	N/A	N/A	N/A	N/A	N/A	N/A	N/A
Lim (2014)	Stability of Gut Enterotypes in Korean Monozygotic Twins and Their Association with Biomarkers and Diet	Scientific Reports	PRJEB1690	SAMEA2055272	Illumina HiSeq 2000	PAIRED	Healthy	Healthy	Adult	N/A	N/A	N/A	N/A	N/A	N/A	N/A	N/A	N/A	N/A	N/A	N/A
Lim (2014)	Stability of Gut Enterotypes in Korean Monozygotic Twins and Their Association with Biomarkers and Diet	Scientific Reports	PRJEB1690	SAMEA2055274	Illumina HiSeq 2000	PAIRED	Healthy	Healthy	Adult	N/A	N/A	N/A	N/A	N/A	N/A	N/A	N/A	N/A	N/A	N/A	N/A
Lim (2014)	Stability of Gut Enterotypes in Korean Monozygotic Twins and Their Association with Biomarkers and Diet	Scientific Reports	PRJEB1690	SAMEA2055277	Illumina HiSeq 2000	PAIRED	Healthy	Healthy	Adult	N/A	N/A	N/A	N/A	N/A	N/A	N/A	N/A	N/A	N/A	N/A	N/A
Lim (2014)	Stability of Gut Enterotypes in Korean Monozygotic Twins and Their Association with Biomarkers and Diet	Scientific Reports	PRJEB1690	SAMEA2055279	Illumina HiSeq 2000	PAIRED	Healthy	Healthy	Adult	N/A	N/A	N/A	N/A	N/A	N/A	N/A	N/A	N/A	N/A	N/A	N/A
Lim (2014)	Stability of Gut Enterotypes in Korean Monozygotic Twins and Their Association with Biomarkers and Diet	Scientific Reports	PRJEB1690	SAMEA2055281	Illumina HiSeq 2000	PAIRED	Healthy	Healthy	Adult	N/A	N/A	N/A	N/A	N/A	N/A	N/A	N/A	N/A	N/A	N/A	N/A
Lim (2014)	Stability of Gut Enterotypes in Korean Monozygotic Twins and Their Association with Biomarkers and Diet	Scientific Reports	PRJEB1690	SAMEA2055283	Illumina HiSeq 2000	PAIRED	Healthy	Healthy	Adult	N/A	N/A	N/A	N/A	N/A	N/A	N/A	N/A	N/A	N/A	N/A	N/A
Lim (2014)	Stability of Gut Enterotypes in Korean Monozygotic Twins and Their Association with Biomarkers and Diet	Scientific Reports	PRJEB1690	SAMEA2055285	Illumina HiSeq 2000	PAIRED	Healthy	Healthy	Adult	N/A	N/A	N/A	N/A	N/A	N/A	N/A	N/A	N/A	N/A	N/A	N/A
Lim (2014)	Stability of Gut Enterotypes in Korean Monozygotic Twins and Their Association with Biomarkers and Diet	Scientific Reports	PRJEB1690	SAMEA2055287	Illumina HiSeq 2000	PAIRED	Healthy	Healthy	Adult	N/A	N/A	N/A	N/A	N/A	N/A	N/A	N/A	N/A	N/A	N/A	N/A
Lim (2014)	Stability of Gut Enterotypes in Korean Monozygotic Twins and Their Association with Biomarkers and Diet	Scientific Reports	PRJEB1690	SAMEA2055289	Illumina HiSeq 2000	PAIRED	Healthy	Healthy	Adult	N/A	N/A	N/A	N/A	N/A	N/A	N/A	N/A	N/A	N/A	N/A	N/A
Lim (2014)	Stability of Gut Enterotypes in Korean Monozygotic Twins and Their Association with Biomarkers and Diet	Scientific Reports	PRJEB1690	SAMEA2055291	Illumina HiSeq 2000	PAIRED	Healthy	Healthy	Adult	N/A	N/A	N/A	N/A	N/A	N/A	N/A	N/A	N/A	N/A	N/A	N/A
Lim (2014)	Stability of Gut Enterotypes in Korean Monozygotic Twins and Their Association with Biomarkers and Diet	Scientific Reports	PRJEB1690	SAMEA2055293	Illumina HiSeq 2000	PAIRED	Healthy	Healthy	Adult	N/A	N/A	N/A	N/A	N/A	N/A	N/A	N/A	N/A	N/A	N/A	N/A
Schirmer (2016)	Linking the Human Gut Microbiome to Inflammatory Cytokine Production Capacity	Cell	PRJNA319574	SAMN06110334	Illumina HiSeq 2000	PAIRED	Healthy	Healthy	Adult	N/A	N/A	N/A	N/A	N/A	N/A	N/A	N/A	N/A	N/A	N/A	N/A
Schirmer (2016)	Linking the Human Gut Microbiome to Inflammatory Cytokine Production Capacity	Cell	PRJNA319574	SAMN06110224	Illumina HiSeq 2000	PAIRED	Healthy	Healthy	Adult	N/A	N/A	N/A	N/A	N/A	N/A	N/A	N/A	N/A	N/A	N/A	N/A
Schirmer (2016)	Linking the Human Gut Microbiome to Inflammatory Cytokine Production Capacity	Cell	PRJNA319574	SAMN06110062	Illumina HiSeq 2000	PAIRED	Healthy	Healthy	Adult	N/A	N/A	N/A	N/A	N/A	N/A	N/A	N/A	N/A	N/A	N/A	N/A
Schirmer (2016)	Linking the Human Gut Microbiome to Inflammatory Cytokine Production Capacity	Cell	PRJNA319574	SAMN06110175	Illumina HiSeq 2000	PAIRED	Healthy	Healthy	Adult	N/A	N/A	N/A	N/A	N/A	N/A	N/A	N/A	N/A	N/A	N/A	N/A
Schirmer (2016)	Linking the Human Gut Microbiome to Inflammatory Cytokine Production Capacity	Cell	PRJNA319574	SAMN06110167	Illumina HiSeq 2000	PAIRED	Healthy	Healthy	Adult	N/A	N/A	N/A	N/A	N/A	N/A	N/A	N/A	N/A	N/A	N/A	N/A
Schirmer (2016)	Linking the Human Gut Microbiome to Inflammatory Cytokine Production Capacity	Cell	PRJNA319574	SAMN06110376	Illumina HiSeq 2000	PAIRED	Healthy	Healthy	Adult	N/A	N/A	N/A	N/A	N/A	N/A	N/A	N/A	N/A	N/A	N/A	N/A
Schirmer (2016)	Linking the Human Gut Microbiome to Inflammatory Cytokine Production Capacity	Cell	PRJNA319574	SAMN06110010	Illumina HiSeq 2000	PAIRED	Healthy	Healthy	Adult	N/A	N/A	N/A	N/A	N/A	N/A	N/A	N/A	N/A	N/A	N/A	N/A
Schirmer (2016)	Linking the Human Gut Microbiome to Inflammatory Cytokine Production Capacity	Cell	PRJNA319574	SAMN06110221	Illumina HiSeq 2000	PAIRED	Healthy	Healthy	Adult	N/A	N/A	N/A	N/A	N/A	N/A	N/A	N/A	N/A	N/A	N/A	N/A
Schirmer (2016)	Linking the Human Gut Microbiome to Inflammatory Cytokine Production Capacity	Cell	PRJNA319574	SAMN06110008	Illumina HiSeq 2000	PAIRED	Healthy	Healthy	Adult	N/A	N/A	N/A	N/A	N/A	N/A	N/A	N/A	N/A	N/A	N/A	N/A
Schirmer (2016)	Linking the Human Gut Microbiome to Inflammatory Cytokine Production Capacity	Cell	PRJNA319574	SAMN06110254	Illumina HiSeq 2000	PAIRED	Healthy	Healthy	Adult	N/A	N/A	N/A	N/A	N/A	N/A	N/A	N/A	N/A	N/A	N/A	N/A
Schirmer (2016)	Linking the Human Gut Microbiome to Inflammatory Cytokine Production Capacity	Cell	PRJNA319574	SAMN06110105	Illumina HiSeq 2000	PAIRED	Healthy	Healthy	Adult	N/A	N/A	N/A	N/A	N/A	N/A	N/A	N/A	N/A	N/A	N/A	N/A
Schirmer (2016)	Linking the Human Gut Microbiome to Inflammatory Cytokine Production Capacity	Cell	PRJNA319574	SAMN06110346	Illumina HiSeq 2000	PAIRED	Healthy	Healthy	Adult	N/A	N/A	N/A	N/A	N/A	N/A	N/A	N/A	N/A	N/A	N/A	N/A
Schirmer (2016)	Linking the Human Gut Microbiome to Inflammatory Cytokine Production Capacity	Cell	PRJNA319574	SAMN06110218	Illumina HiSeq 2000	PAIRED	Healthy	Healthy	Adult	N/A	N/A	N/A	N/A	N/A	N/A	N/A	N/A	N/A	N/A	N/A	N/A
Schirmer (2016)	Linking the Human Gut Microbiome to Inflammatory Cytokine Production Capacity	Cell	PRJNA319574	SAMN06110266	Illumina HiSeq 2000	PAIRED	Healthy	Healthy	Adult	N/A	N/A	N/A	N/A	N/A	N/A	N/A	N/A	N/A	N/A	N/A	N/A
Schirmer (2016)	Linking the Human Gut Microbiome to Inflammatory Cytokine Production Capacity	Cell	PRJNA319574	SAMN06110233	Illumina HiSeq 2000	PAIRED	Healthy	Healthy	Adult	N/A	N/A	N/A	N/A	N/A	N/A	N/A	N/A	N/A	N/A	N/A	N/A
Schirmer (2016)	Linking the Human Gut Microbiome to Inflammatory Cytokine Production Capacity	Cell	PRJNA319574	SAMN06110353	Illumina HiSeq 2000	PAIRED	Healthy	Healthy	Adult	N/A	N/A	N/A	N/A	N/A	N/A	N/A	N/A	N/A	N/A	N/A	N/A
Schirmer (2016)	Linking the Human Gut Microbiome to Inflammatory Cytokine Production Capacity	Cell	PRJNA319574	SAMN06110381	Illumina HiSeq 2000	PAIRED	Healthy	Healthy	Adult	N/A	N/A	N/A	N/A	N/A	N/A	N/A	N/A	N/A	N/A	N/A	N/A
Schirmer (2016)	Linking the Human Gut Microbiome to Inflammatory Cytokine Production Capacity	Cell	PRJNA319574	SAMN06110136	Illumina HiSeq 2000	PAIRED	Healthy	Healthy	Adult	N/A	N/A	N/A	N/A	N/A	N/A	N/A	N/A	N/A	N/A	N/A	N/A
Schirmer (2016)	Linking the Human Gut Microbiome to Inflammatory Cytokine Production Capacity	Cell	PRJNA319574	SAMN06110467	Illumina HiSeq 2000	PAIRED	Healthy	Healthy	Adult	N/A	N/A	N/A	N/A	N/A	N/A	N/A	N/A	N/A	N/A	N/A	N/A
Schirmer (2016)	Linking the Human Gut Microbiome to Inflammatory Cytokine Production Capacity	Cell	PRJNA319574	SAMN06110342	Illumina HiSeq 2000	PAIRED	Healthy	Healthy	Adult	N/A	N/A	N/A	N/A	N/A	N/A	N/A	N/A	N/A	N/A	N/A	N/A
Schirmer (2016)	Linking the Human Gut Microbiome to Inflammatory Cytokine Production Capacity	Cell	PRJNA319574	SAMN06110131	Illumina HiSeq 2000	PAIRED	Healthy	Healthy	Adult	N/A	N/A	N/A	N/A	N/A	N/A	N/A	N/A	N/A	N/A	N/A	N/A
Schirmer (2016)	Linking the Human Gut Microbiome to Inflammatory Cytokine Production Capacity	Cell	PRJNA319574	SAMN06110435	Illumina HiSeq 2000	PAIRED	Healthy	Healthy	Adult	N/A	N/A	N/A	N/A	N/A	N/A	N/A	N/A	N/A	N/A	N/A	N/A
Schirmer (2016)	Linking the Human Gut Microbiome to Inflammatory Cytokine Production Capacity	Cell	PRJNA319574	SAMN06110411	Illumina HiSeq 2000	PAIRED	Healthy	Healthy	Adult	N/A	N/A	N/A	N/A	N/A	N/A	N/A	N/A	N/A	N/A	N/A	N/A
Schirmer (2016)	Linking the Human Gut Microbiome to Inflammatory Cytokine Production Capacity	Cell	PRJNA319574	SAMN06110301	Illumina HiSeq 2000	PAIRED	Healthy	Healthy	Adult	N/A	N/A	N/A	N/A	N/A	N/A	N/A	N/A	N/A	N/A	N/A	N/A
Schirmer (2016)	Linking the Human Gut Microbiome to Inflammatory Cytokine Production Capacity	Cell	PRJNA319574	SAMN06110012	Illumina HiSeq 2000	PAIRED	Healthy	Healthy	Adult	N/A	N/A	N/A	N/A	N/A	N/A	N/A	N/A	N/A	N/A	N/A	N/A
Schirmer (2016)	Linking the Human Gut Microbiome to Inflammatory Cytokine Production Capacity	Cell	PRJNA319574	SAMN06110307	Illumina HiSeq 2000	PAIRED	Healthy	Healthy	Adult	N/A	N/A	N/A	N/A	N/A	N/A	N/A	N/A	N/A	N/A	N/A	N/A
Schirmer (2016)	Linking the Human Gut Microbiome to Inflammatory Cytokine Production Capacity	Cell	PRJNA319574	SAMN06110401	Illumina HiSeq 2000	PAIRED	Healthy	Healthy	Adult	N/A	N/A	N/A	N/A	N/A	N/A	N/A	N/A	N/A	N/A	N/A	N/A
Schirmer (2016)	Linking the Human Gut Microbiome to Inflammatory Cytokine Production Capacity	Cell	PRJNA319574	SAMN06110178	Illumina HiSeq 2000	PAIRED	Healthy	Healthy	Adult	N/A	N/A	N/A	N/A	N/A	N/A	N/A	N/A	N/A	N/A	N/A	N/A
Schirmer (2016)	Linking the Human Gut Microbiome to Inflammatory Cytokine Production Capacity	Cell	PRJNA319574	SAMN06110150	Illumina HiSeq 2000	PAIRED	Healthy	Healthy	Adult	N/A	N/A	N/A	N/A	N/A	N/A	N/A	N/A	N/A	N/A	N/A	N/A
Schirmer (2016)	Linking the Human Gut Microbiome to Inflammatory Cytokine Production Capacity	Cell	PRJNA319574	SAMN06110252	Illumina HiSeq 2000	PAIRED	Healthy	Healthy	Adult	N/A	N/A	N/A	N/A	N/A	N/A	N/A	N/A	N/A	N/A	N/A	N/A
Schirmer (2016)	Linking the Human Gut Microbiome to Inflammatory Cytokine Production Capacity	Cell	PRJNA319574	SAMN06110367	Illumina HiSeq 2000	PAIRED	Healthy	Healthy	Adult	N/A	N/A	N/A	N/A	N/A	N/A	N/A	N/A	N/A	N/A	N/A	N/A
Schirmer (2016)	Linking the Human Gut Microbiome to Inflammatory Cytokine Production Capacity	Cell	PRJNA319574	SAMN06110317	Illumina HiSeq 2000	PAIRED	Healthy	Healthy	Adult	N/A	N/A	N/A	N/A	N/A	N/A	N/A	N/A	N/A	N/A	N/A	N/A
Schirmer (2016)	Linking the Human Gut Microbiome to Inflammatory Cytokine Production Capacity	Cell	PRJNA319574	SAMN06110273	Illumina HiSeq 2000	PAIRED	Healthy	Healthy	Adult	N/A	N/A	N/A	N/A	N/A	N/A	N/A	N/A	N/A	N/A	N/A	N/A
Schirmer (2016)	Linking the Human Gut Microbiome to Inflammatory Cytokine Production Capacity	Cell	PRJNA319574	SAMN06110227	Illumina HiSeq 2000	PAIRED	Healthy	Healthy	Adult	N/A	N/A	N/A	N/A	N/A	N/A	N/A	N/A	N/A	N/A	N/A	N/A
Schirmer (2016)	Linking the Human Gut Microbiome to Inflammatory Cytokine Production Capacity	Cell	PRJNA319574	SAMN06110104	Illumina HiSeq 2000	PAIRED	Healthy	Healthy	Adult	N/A	N/A	N/A	N/A	N/A	N/A	N/A	N/A	N/A	N/A	N/A	N/A
Schirmer (2016)	Linking the Human Gut Microbiome to Inflammatory Cytokine Production Capacity	Cell	PRJNA319574	SAMN06110219	Illumina HiSeq 2000	PAIRED	Healthy	Healthy	Adult	N/A	N/A	N/A	N/A	N/A	N/A	N/A	N/A	N/A	N/A	N/A	N/A
Schirmer (2016)	Linking the Human Gut Microbiome to Inflammatory Cytokine Production Capacity	Cell	PRJNA319574	SAMN06110449	Illumina HiSeq 2000	PAIRED	Healthy	Healthy	Adult	N/A	N/A	N/A	N/A	N/A	N/A	N/A	N/A	N/A	N/A	N/A	N/A
Schirmer (2016)	Linking the Human Gut Microbiome to Inflammatory Cytokine Production Capacity	Cell	PRJNA319574	SAMN06110109	Illumina HiSeq 2000	PAIRED	Healthy	Healthy	Adult	N/A	N/A	N/A	N/A	N/A	N/A	N/A	N/A	N/A	N/A	N/A	N/A
Schirmer (2016)	Linking the Human Gut Microbiome to Inflammatory Cytokine Production Capacity	Cell	PRJNA319574	SAMN06110091	Illumina HiSeq 2000	PAIRED	Healthy	Healthy	Adult	N/A	N/A	N/A	N/A	N/A	N/A	N/A	N/A	N/A	N/A	N/A	N/A
Schirmer (2016)	Linking the Human Gut Microbiome to Inflammatory Cytokine Production Capacity	Cell	PRJNA319574	SAMN06110020	Illumina HiSeq 2000	PAIRED	Healthy	Healthy	Adult	N/A	N/A	N/A	N/A	N/A	N/A	N/A	N/A	N/A	N/A	N/A	N/A
Schirmer (2016)	Linking the Human Gut Microbiome to Inflammatory Cytokine Production Capacity	Cell	PRJNA319574	SAMN06110297	Illumina HiSeq 2000	PAIRED	Healthy	Healthy	Adult	N/A	N/A	N/A	N/A	N/A	N/A	N/A	N/A	N/A	N/A	N/A	N/A
Schirmer (2016)	Linking the Human Gut Microbiome to Inflammatory Cytokine Production Capacity	Cell	PRJNA319574	SAMN06110351	Illumina HiSeq 2000	PAIRED	Healthy	Healthy	Adult	N/A	N/A	N/A	N/A	N/A	N/A	N/A	N/A	N/A	N/A	N/A	N/A
Schirmer (2016)	Linking the Human Gut Microbiome to Inflammatory Cytokine Production Capacity	Cell	PRJNA319574	SAMN06110303	Illumina HiSeq 2000	PAIRED	Healthy	Healthy	Adult	N/A	N/A	N/A	N/A	N/A	N/A	N/A	N/A	N/A	N/A	N/A	N/A
Schirmer (2016)	Linking the Human Gut Microbiome to Inflammatory Cytokine Production Capacity	Cell	PRJNA319574	SAMN06110261	Illumina HiSeq 2000	PAIRED	Healthy	Healthy	Adult	N/A	N/A	N/A	N/A	N/A	N/A	N/A	N/A	N/A	N/A	N/A	N/A
Schirmer (2016)	Linking the Human Gut Microbiome to Inflammatory Cytokine Production Capacity	Cell	PRJNA319574	SAMN06110225	Illumina HiSeq 2000	PAIRED	Healthy	Healthy	Adult	N/A	N/A	N/A	N/A	N/A	N/A	N/A	N/A	N/A	N/A	N/A	N/A
Schirmer (2016)	Linking the Human Gut Microbiome to Inflammatory Cytokine Production Capacity	Cell	PRJNA319574	SAMN06110076	Illumina HiSeq 2000	PAIRED	Healthy	Healthy	Adult	N/A	N/A	N/A	N/A	N/A	N/A	N/A	N/A	N/A	N/A	N/A	N/A
Schirmer (2016)	Linking the Human Gut Microbiome to Inflammatory Cytokine Production Capacity	Cell	PRJNA319574	SAMN06110236	Illumina HiSeq 2000	PAIRED	Healthy	Healthy	Adult	N/A	N/A	N/A	N/A	N/A	N/A	N/A	N/A	N/A	N/A	N/A	N/A
Schirmer (2016)	Linking the Human Gut Microbiome to Inflammatory Cytokine Production Capacity	Cell	PRJNA319574	SAMN06110321	Illumina HiSeq 2000	PAIRED	Healthy	Healthy	Adult	N/A	N/A	N/A	N/A	N/A	N/A	N/A	N/A	N/A	N/A	N/A	N/A
Schirmer (2016)	Linking the Human Gut Microbiome to Inflammatory Cytokine Production Capacity	Cell	PRJNA319574	SAMN06110391	Illumina HiSeq 2000	PAIRED	Healthy	Healthy	Adult	N/A	N/A	N/A	N/A	N/A	N/A	N/A	N/A	N/A	N/A	N/A	N/A
Schirmer (2016)	Linking the Human Gut Microbiome to Inflammatory Cytokine Production Capacity	Cell	PRJNA319574	SAMN06110323	Illumina HiSeq 2000	PAIRED	Healthy	Healthy	Adult	N/A	N/A	N/A	N/A	N/A	N/A	N/A	N/A	N/A	N/A	N/A	N/A
Schirmer (2016)	Linking the Human Gut Microbiome to Inflammatory Cytokine Production Capacity	Cell	PRJNA319574	SAMN06110422	Illumina HiSeq 2000	PAIRED	Healthy	Healthy	Adult	N/A	N/A	N/A	N/A	N/A	N/A	N/A	N/A	N/A	N/A	N/A	N/A
Schirmer (2016)	Linking the Human Gut Microbiome to Inflammatory Cytokine Production Capacity	Cell	PRJNA319574	SAMN06110147	Illumina HiSeq 2000	PAIRED	Healthy	Healthy	Adult	N/A	N/A	N/A	N/A	N/A	N/A	N/A	N/A	N/A	N/A	N/A	N/A
Schirmer (2016)	Linking the Human Gut Microbiome to Inflammatory Cytokine Production Capacity	Cell	PRJNA319574	SAMN06110419	Illumina HiSeq 2000	PAIRED	Healthy	Healthy	Adult	N/A	N/A	N/A	N/A	N/A	N/A	N/A	N/A	N/A	N/A	N/A	N/A
Schirmer (2016)	Linking the Human Gut Microbiome to Inflammatory Cytokine Production Capacity	Cell	PRJNA319574	SAMN06110325	Illumina HiSeq 2000	PAIRED	Healthy	Healthy	Adult	N/A	N/A	N/A	N/A	N/A	N/A	N/A	N/A	N/A	N/A	N/A	N/A
Schirmer (2016)	Linking the Human Gut Microbiome to Inflammatory Cytokine Production Capacity	Cell	PRJNA319574	SAMN06110123	Illumina HiSeq 2000	PAIRED	Healthy	Healthy	Adult	N/A	N/A	N/A	N/A	N/A	N/A	N/A	N/A	N/A	N/A	N/A	N/A
Schirmer (2016)	Linking the Human Gut Microbiome to Inflammatory Cytokine Production Capacity	Cell	PRJNA319574	SAMN06110024	Illumina HiSeq 2000	PAIRED	Healthy	Healthy	Adult	N/A	N/A	N/A	N/A	N/A	N/A	N/A	N/A	N/A	N/A	N/A	N/A
Schirmer (2016)	Linking the Human Gut Microbiome to Inflammatory Cytokine Production Capacity	Cell	PRJNA319574	SAMN06110215	Illumina HiSeq 2000	PAIRED	Healthy	Healthy	Adult	N/A	N/A	N/A	N/A	N/A	N/A	N/A	N/A	N/A	N/A	N/A	N/A
Schirmer (2016)	Linking the Human Gut Microbiome to Inflammatory Cytokine Production Capacity	Cell	PRJNA319574	SAMN06110210	Illumina HiSeq 2000	PAIRED	Healthy	Healthy	Adult	N/A	N/A	N/A	N/A	N/A	N/A	N/A	N/A	N/A	N/A	N/A	N/A
Schirmer (2016)	Linking the Human Gut Microbiome to Inflammatory Cytokine Production Capacity	Cell	PRJNA319574	SAMN06110165	Illumina HiSeq 2000	PAIRED	Healthy	Healthy	Adult	N/A	N/A	N/A	N/A	N/A	N/A	N/A	N/A	N/A	N/A	N/A	N/A
Schirmer (2016)	Linking the Human Gut Microbiome to Inflammatory Cytokine Production Capacity	Cell	PRJNA319574	SAMN06110439	Illumina HiSeq 2000	PAIRED	Healthy	Healthy	Adult	N/A	N/A	N/A	N/A	N/A	N/A	N/A	N/A	N/A	N/A	N/A	N/A
Schirmer (2016)	Linking the Human Gut Microbiome to Inflammatory Cytokine Production Capacity	Cell	PRJNA319574	SAMN06110457	Illumina HiSeq 2000	PAIRED	Healthy	Healthy	Adult	N/A	N/A	N/A	N/A	N/A	N/A	N/A	N/A	N/A	N/A	N/A	N/A
Schirmer (2016)	Linking the Human Gut Microbiome to Inflammatory Cytokine Production Capacity	Cell	PRJNA319574	SAMN06110440	Illumina HiSeq 2000	PAIRED	Healthy	Healthy	Adult	N/A	N/A	N/A	N/A	N/A	N/A	N/A	N/A	N/A	N/A	N/A	N/A
Schirmer (2016)	Linking the Human Gut Microbiome to Inflammatory Cytokine Production Capacity	Cell	PRJNA319574	SAMN06110153	Illumina HiSeq 2000	PAIRED	Healthy	Healthy	Adult	N/A	N/A	N/A	N/A	N/A	N/A	N/A	N/A	N/A	N/A	N/A	N/A
Schirmer (2016)	Linking the Human Gut Microbiome to Inflammatory Cytokine Production Capacity	Cell	PRJNA319574	SAMN06110299	Illumina HiSeq 2000	PAIRED	Healthy	Healthy	Adult	N/A	N/A	N/A	N/A	N/A	N/A	N/A	N/A	N/A	N/A	N/A	N/A
Schirmer (2016)	Linking the Human Gut Microbiome to Inflammatory Cytokine Production Capacity	Cell	PRJNA319574	SAMN06110408	Illumina HiSeq 2000	PAIRED	Healthy	Healthy	Adult	N/A	N/A	N/A	N/A	N/A	N/A	N/A	N/A	N/A	N/A	N/A	N/A
Schirmer (2016)	Linking the Human Gut Microbiome to Inflammatory Cytokine Production Capacity	Cell	PRJNA319574	SAMN06110272	Illumina HiSeq 2000	PAIRED	Healthy	Healthy	Adult	N/A	N/A	N/A	N/A	N/A	N/A	N/A	N/A	N/A	N/A	N/A	N/A
Schirmer (2016)	Linking the Human Gut Microbiome to Inflammatory Cytokine Production Capacity	Cell	PRJNA319574	SAMN06110027	Illumina HiSeq 2000	PAIRED	Healthy	Healthy	Adult	N/A	N/A	N/A	N/A	N/A	N/A	N/A	N/A	N/A	N/A	N/A	N/A
Schirmer (2016)	Linking the Human Gut Microbiome to Inflammatory Cytokine Production Capacity	Cell	PRJNA319574	SAMN06110050	Illumina HiSeq 2000	PAIRED	Healthy	Healthy	Adult	N/A	N/A	N/A	N/A	N/A	N/A	N/A	N/A	N/A	N/A	N/A	N/A
Schirmer (2016)	Linking the Human Gut Microbiome to Inflammatory Cytokine Production Capacity	Cell	PRJNA319574	SAMN06110246	Illumina HiSeq 2000	PAIRED	Healthy	Healthy	Adult	N/A	N/A	N/A	N/A	N/A	N/A	N/A	N/A	N/A	N/A	N/A	N/A
Schirmer (2016)	Linking the Human Gut Microbiome to Inflammatory Cytokine Production Capacity	Cell	PRJNA319574	SAMN06110090	Illumina HiSeq 2000	PAIRED	Healthy	Healthy	Adult	N/A	N/A	N/A	N/A	N/A	N/A	N/A	N/A	N/A	N/A	N/A	N/A
Schirmer (2016)	Linking the Human Gut Microbiome to Inflammatory Cytokine Production Capacity	Cell	PRJNA319574	SAMN06110177	Illumina HiSeq 2000	PAIRED	Healthy	Healthy	Adult	N/A	N/A	N/A	N/A	N/A	N/A	N/A	N/A	N/A	N/A	N/A	N/A
Schirmer (2016)	Linking the Human Gut Microbiome to Inflammatory Cytokine Production Capacity	Cell	PRJNA319574	SAMN06110458	Illumina HiSeq 2000	PAIRED	Healthy	Healthy	Adult	N/A	N/A	N/A	N/A	N/A	N/A	N/A	N/A	N/A	N/A	N/A	N/A
Schirmer (2016)	Linking the Human Gut Microbiome to Inflammatory Cytokine Production Capacity	Cell	PRJNA319574	SAMN06110333	Illumina HiSeq 2000	PAIRED	Healthy	Healthy	Adult	N/A	N/A	N/A	N/A	N/A	N/A	N/A	N/A	N/A	N/A	N/A	N/A
Schirmer (2016)	Linking the Human Gut Microbiome to Inflammatory Cytokine Production Capacity	Cell	PRJNA319574	SAMN06110418	Illumina HiSeq 2000	PAIRED	Healthy	Healthy	Adult	N/A	N/A	N/A	N/A	N/A	N/A	N/A	N/A	N/A	N/A	N/A	N/A
Schirmer (2016)	Linking the Human Gut Microbiome to Inflammatory Cytokine Production Capacity	Cell	PRJNA319574	SAMN06110327	Illumina HiSeq 2000	PAIRED	Healthy	Healthy	Adult	N/A	N/A	N/A	N/A	N/A	N/A	N/A	N/A	N/A	N/A	N/A	N/A
Schirmer (2016)	Linking the Human Gut Microbiome to Inflammatory Cytokine Production Capacity	Cell	PRJNA319574	SAMN06110157	Illumina HiSeq 2000	PAIRED	Healthy	Healthy	Adult	N/A	N/A	N/A	N/A	N/A	N/A	N/A	N/A	N/A	N/A	N/A	N/A
Schirmer (2016)	Linking the Human Gut Microbiome to Inflammatory Cytokine Production Capacity	Cell	PRJNA319574	SAMN06110360	Illumina HiSeq 2000	PAIRED	Healthy	Healthy	Adult	N/A	N/A	N/A	N/A	N/A	N/A	N/A	N/A	N/A	N/A	N/A	N/A
Schirmer (2016)	Linking the Human Gut Microbiome to Inflammatory Cytokine Production Capacity	Cell	PRJNA319574	SAMN06110400	Illumina HiSeq 2000	PAIRED	Healthy	Healthy	Adult	N/A	N/A	N/A	N/A	N/A	N/A	N/A	N/A	N/A	N/A	N/A	N/A
Schirmer (2016)	Linking the Human Gut Microbiome to Inflammatory Cytokine Production Capacity	Cell	PRJNA319574	SAMN06110379	Illumina HiSeq 2000	PAIRED	Healthy	Healthy	Adult	N/A	N/A	N/A	N/A	N/A	N/A	N/A	N/A	N/A	N/A	N/A	N/A
Schirmer (2016)	Linking the Human Gut Microbiome to Inflammatory Cytokine Production Capacity	Cell	PRJNA319574	SAMN06110164	Illumina HiSeq 2000	PAIRED	Healthy	Healthy	Adult	N/A	N/A	N/A	N/A	N/A	N/A	N/A	N/A	N/A	N/A	N/A	N/A
Schirmer (2016)	Linking the Human Gut Microbiome to Inflammatory Cytokine Production Capacity	Cell	PRJNA319574	SAMN06110416	Illumina HiSeq 2000	PAIRED	Healthy	Healthy	Adult	N/A	N/A	N/A	N/A	N/A	N/A	N/A	N/A	N/A	N/A	N/A	N/A
Schirmer (2016)	Linking the Human Gut Microbiome to Inflammatory Cytokine Production Capacity	Cell	PRJNA319574	SAMN06110277	Illumina HiSeq 2000	PAIRED	Healthy	Healthy	Adult	N/A	N/A	N/A	N/A	N/A	N/A	N/A	N/A	N/A	N/A	N/A	N/A
Schirmer (2016)	Linking the Human Gut Microbiome to Inflammatory Cytokine Production Capacity	Cell	PRJNA319574	SAMN06110015	Illumina HiSeq 2000	PAIRED	Healthy	Healthy	Adult	N/A	N/A	N/A	N/A	N/A	N/A	N/A	N/A	N/A	N/A	N/A	N/A
Schirmer (2016)	Linking the Human Gut Microbiome to Inflammatory Cytokine Production Capacity	Cell	PRJNA319574	SAMN06110417	Illumina HiSeq 2000	PAIRED	Healthy	Healthy	Adult	N/A	N/A	N/A	N/A	N/A	N/A	N/A	N/A	N/A	N/A	N/A	N/A
Schirmer (2016)	Linking the Human Gut Microbiome to Inflammatory Cytokine Production Capacity	Cell	PRJNA319574	SAMN06110060	Illumina HiSeq 2000	PAIRED	Healthy	Healthy	Adult	N/A	N/A	N/A	N/A	N/A	N/A	N/A	N/A	N/A	N/A	N/A	N/A
Schirmer (2016)	Linking the Human Gut Microbiome to Inflammatory Cytokine Production Capacity	Cell	PRJNA319574	SAMN06110378	Illumina HiSeq 2000	PAIRED	Healthy	Healthy	Adult	N/A	N/A	N/A	N/A	N/A	N/A	N/A	N/A	N/A	N/A	N/A	N/A
Schirmer (2016)	Linking the Human Gut Microbiome to Inflammatory Cytokine Production Capacity	Cell	PRJNA319574	SAMN06110208	Illumina HiSeq 2000	PAIRED	Healthy	Healthy	Adult	N/A	N/A	N/A	N/A	N/A	N/A	N/A	N/A	N/A	N/A	N/A	N/A
Schirmer (2016)	Linking the Human Gut Microbiome to Inflammatory Cytokine Production Capacity	Cell	PRJNA319574	SAMN06110285	Illumina HiSeq 2000	PAIRED	Healthy	Healthy	Adult	N/A	N/A	N/A	N/A	N/A	N/A	N/A	N/A	N/A	N/A	N/A	N/A
Schirmer (2016)	Linking the Human Gut Microbiome to Inflammatory Cytokine Production Capacity	Cell	PRJNA319574	SAMN06110371	Illumina HiSeq 2000	PAIRED	Healthy	Healthy	Adult	N/A	N/A	N/A	N/A	N/A	N/A	N/A	N/A	N/A	N/A	N/A	N/A
Schirmer (2016)	Linking the Human Gut Microbiome to Inflammatory Cytokine Production Capacity	Cell	PRJNA319574	SAMN06110035	Illumina HiSeq 2000	PAIRED	Healthy	Healthy	Adult	N/A	N/A	N/A	N/A	N/A	N/A	N/A	N/A	N/A	N/A	N/A	N/A
Schirmer (2016)	Linking the Human Gut Microbiome to Inflammatory Cytokine Production Capacity	Cell	PRJNA319574	SAMN06110117	Illumina HiSeq 2000	PAIRED	Healthy	Healthy	Adult	N/A	N/A	N/A	N/A	N/A	N/A	N/A	N/A	N/A	N/A	N/A	N/A
Schirmer (2016)	Linking the Human Gut Microbiome to Inflammatory Cytokine Production Capacity	Cell	PRJNA319574	SAMN06110203	Illumina HiSeq 2000	PAIRED	Healthy	Healthy	Adult	N/A	N/A	N/A	N/A	N/A	N/A	N/A	N/A	N/A	N/A	N/A	N/A
Schirmer (2016)	Linking the Human Gut Microbiome to Inflammatory Cytokine Production Capacity	Cell	PRJNA319574	SAMN06110156	Illumina HiSeq 2000	PAIRED	Healthy	Healthy	Adult	N/A	N/A	N/A	N/A	N/A	N/A	N/A	N/A	N/A	N/A	N/A	N/A
Schirmer (2016)	Linking the Human Gut Microbiome to Inflammatory Cytokine Production Capacity	Cell	PRJNA319574	SAMN06110216	Illumina HiSeq 2000	PAIRED	Healthy	Healthy	Adult	N/A	N/A	N/A	N/A	N/A	N/A	N/A	N/A	N/A	N/A	N/A	N/A
Schirmer (2016)	Linking the Human Gut Microbiome to Inflammatory Cytokine Production Capacity	Cell	PRJNA319574	SAMN06110001	Illumina HiSeq 2000	PAIRED	Healthy	Healthy	Adult	N/A	N/A	N/A	N/A	N/A	N/A	N/A	N/A	N/A	N/A	N/A	N/A
Schirmer (2016)	Linking the Human Gut Microbiome to Inflammatory Cytokine Production Capacity	Cell	PRJNA319574	SAMN06110155	Illumina HiSeq 2000	PAIRED	Healthy	Healthy	Adult	N/A	N/A	N/A	N/A	N/A	N/A	N/A	N/A	N/A	N/A	N/A	N/A
Schirmer (2016)	Linking the Human Gut Microbiome to Inflammatory Cytokine Production Capacity	Cell	PRJNA319574	SAMN06110269	Illumina HiSeq 2000	PAIRED	Healthy	Healthy	Adult	N/A	N/A	N/A	N/A	N/A	N/A	N/A	N/A	N/A	N/A	N/A	N/A
Schirmer (2016)	Linking the Human Gut Microbiome to Inflammatory Cytokine Production Capacity	Cell	PRJNA319574	SAMN06110369	Illumina HiSeq 2000	PAIRED	Healthy	Healthy	Adult	N/A	N/A	N/A	N/A	N/A	N/A	N/A	N/A	N/A	N/A	N/A	N/A
Schirmer (2016)	Linking the Human Gut Microbiome to Inflammatory Cytokine Production Capacity	Cell	PRJNA319574	SAMN06110337	Illumina HiSeq 2000	PAIRED	Healthy	Healthy	Adult	N/A	N/A	N/A	N/A	N/A	N/A	N/A	N/A	N/A	N/A	N/A	N/A
Schirmer (2016)	Linking the Human Gut Microbiome to Inflammatory Cytokine Production Capacity	Cell	PRJNA319574	SAMN06110056	Illumina HiSeq 2000	PAIRED	Healthy	Healthy	Adult	N/A	N/A	N/A	N/A	N/A	N/A	N/A	N/A	N/A	N/A	N/A	N/A
Schirmer (2016)	Linking the Human Gut Microbiome to Inflammatory Cytokine Production Capacity	Cell	PRJNA319574	SAMN06110037	Illumina HiSeq 2000	PAIRED	Healthy	Healthy	Adult	N/A	N/A	N/A	N/A	N/A	N/A	N/A	N/A	N/A	N/A	N/A	N/A
Schirmer (2016)	Linking the Human Gut Microbiome to Inflammatory Cytokine Production Capacity	Cell	PRJNA319574	SAMN06110018	Illumina HiSeq 2000	PAIRED	Healthy	Healthy	Adult	N/A	N/A	N/A	N/A	N/A	N/A	N/A	N/A	N/A	N/A	N/A	N/A
Schirmer (2016)	Linking the Human Gut Microbiome to Inflammatory Cytokine Production Capacity	Cell	PRJNA319574	SAMN06110049	Illumina HiSeq 2000	PAIRED	Healthy	Healthy	Adult	N/A	N/A	N/A	N/A	N/A	N/A	N/A	N/A	N/A	N/A	N/A	N/A
Schirmer (2016)	Linking the Human Gut Microbiome to Inflammatory Cytokine Production Capacity	Cell	PRJNA319574	SAMN06110124	Illumina HiSeq 2000	PAIRED	Healthy	Healthy	Adult	N/A	N/A	N/A	N/A	N/A	N/A	N/A	N/A	N/A	N/A	N/A	N/A
Schirmer (2016)	Linking the Human Gut Microbiome to Inflammatory Cytokine Production Capacity	Cell	PRJNA319574	SAMN06110188	Illumina HiSeq 2000	PAIRED	Healthy	Healthy	Adult	N/A	N/A	N/A	N/A	N/A	N/A	N/A	N/A	N/A	N/A	N/A	N/A
Schirmer (2016)	Linking the Human Gut Microbiome to Inflammatory Cytokine Production Capacity	Cell	PRJNA319574	SAMN06110239	Illumina HiSeq 2000	PAIRED	Healthy	Healthy	Adult	N/A	N/A	N/A	N/A	N/A	N/A	N/A	N/A	N/A	N/A	N/A	N/A
Schirmer (2016)	Linking the Human Gut Microbiome to Inflammatory Cytokine Production Capacity	Cell	PRJNA319574	SAMN06110238	Illumina HiSeq 2000	PAIRED	Healthy	Healthy	Adult	N/A	N/A	N/A	N/A	N/A	N/A	N/A	N/A	N/A	N/A	N/A	N/A
Schirmer (2016)	Linking the Human Gut Microbiome to Inflammatory Cytokine Production Capacity	Cell	PRJNA319574	SAMN06110319	Illumina HiSeq 2000	PAIRED	Healthy	Healthy	Adult	N/A	N/A	N/A	N/A	N/A	N/A	N/A	N/A	N/A	N/A	N/A	N/A
Schirmer (2016)	Linking the Human Gut Microbiome to Inflammatory Cytokine Production Capacity	Cell	PRJNA319574	SAMN06110220	Illumina HiSeq 2000	PAIRED	Healthy	Healthy	Adult	N/A	N/A	N/A	N/A	N/A	N/A	N/A	N/A	N/A	N/A	N/A	N/A
Schirmer (2016)	Linking the Human Gut Microbiome to Inflammatory Cytokine Production Capacity	Cell	PRJNA319574	SAMN06110308	Illumina HiSeq 2000	PAIRED	Healthy	Healthy	Adult	N/A	N/A	N/A	N/A	N/A	N/A	N/A	N/A	N/A	N/A	N/A	N/A
Schirmer (2016)	Linking the Human Gut Microbiome to Inflammatory Cytokine Production Capacity	Cell	PRJNA319574	SAMN06110181	Illumina HiSeq 2000	PAIRED	Healthy	Healthy	Adult	N/A	N/A	N/A	N/A	N/A	N/A	N/A	N/A	N/A	N/A	N/A	N/A
Schirmer (2016)	Linking the Human Gut Microbiome to Inflammatory Cytokine Production Capacity	Cell	PRJNA319574	SAMN06110253	Illumina HiSeq 2000	PAIRED	Healthy	Healthy	Adult	N/A	N/A	N/A	N/A	N/A	N/A	N/A	N/A	N/A	N/A	N/A	N/A
Schirmer (2016)	Linking the Human Gut Microbiome to Inflammatory Cytokine Production Capacity	Cell	PRJNA319574	SAMN06110028	Illumina HiSeq 2000	PAIRED	Healthy	Healthy	Adult	N/A	N/A	N/A	N/A	N/A	N/A	N/A	N/A	N/A	N/A	N/A	N/A
Schirmer (2016)	Linking the Human Gut Microbiome to Inflammatory Cytokine Production Capacity	Cell	PRJNA319574	SAMN06110374	Illumina HiSeq 2000	PAIRED	Healthy	Healthy	Adult	N/A	N/A	N/A	N/A	N/A	N/A	N/A	N/A	N/A	N/A	N/A	N/A
Schirmer (2016)	Linking the Human Gut Microbiome to Inflammatory Cytokine Production Capacity	Cell	PRJNA319574	SAMN06110259	Illumina HiSeq 2000	PAIRED	Healthy	Healthy	Adult	N/A	N/A	N/A	N/A	N/A	N/A	N/A	N/A	N/A	N/A	N/A	N/A
Schirmer (2016)	Linking the Human Gut Microbiome to Inflammatory Cytokine Production Capacity	Cell	PRJNA319574	SAMN06110393	Illumina HiSeq 2000	PAIRED	Healthy	Healthy	Adult	N/A	N/A	N/A	N/A	N/A	N/A	N/A	N/A	N/A	N/A	N/A	N/A
Schirmer (2016)	Linking the Human Gut Microbiome to Inflammatory Cytokine Production Capacity	Cell	PRJNA319574	SAMN06110189	Illumina HiSeq 2000	PAIRED	Healthy	Healthy	Adult	N/A	N/A	N/A	N/A	N/A	N/A	N/A	N/A	N/A	N/A	N/A	N/A
Schirmer (2016)	Linking the Human Gut Microbiome to Inflammatory Cytokine Production Capacity	Cell	PRJNA319574	SAMN06110271	Illumina HiSeq 2000	PAIRED	Healthy	Healthy	Adult	N/A	N/A	N/A	N/A	N/A	N/A	N/A	N/A	N/A	N/A	N/A	N/A
Schirmer (2016)	Linking the Human Gut Microbiome to Inflammatory Cytokine Production Capacity	Cell	PRJNA319574	SAMN06110025	Illumina HiSeq 2000	PAIRED	Healthy	Healthy	Adult	N/A	N/A	N/A	N/A	N/A	N/A	N/A	N/A	N/A	N/A	N/A	N/A
Schirmer (2016)	Linking the Human Gut Microbiome to Inflammatory Cytokine Production Capacity	Cell	PRJNA319574	SAMN06110302	Illumina HiSeq 2000	PAIRED	Healthy	Healthy	Adult	N/A	N/A	N/A	N/A	N/A	N/A	N/A	N/A	N/A	N/A	N/A	N/A
Schirmer (2016)	Linking the Human Gut Microbiome to Inflammatory Cytokine Production Capacity	Cell	PRJNA319574	SAMN06110230	Illumina HiSeq 2000	PAIRED	Healthy	Healthy	Adult	N/A	N/A	N/A	N/A	N/A	N/A	N/A	N/A	N/A	N/A	N/A	N/A
Schirmer (2016)	Linking the Human Gut Microbiome to Inflammatory Cytokine Production Capacity	Cell	PRJNA319574	SAMN06110183	Illumina HiSeq 2000	PAIRED	Healthy	Healthy	Adult	N/A	N/A	N/A	N/A	N/A	N/A	N/A	N/A	N/A	N/A	N/A	N/A
Schirmer (2016)	Linking the Human Gut Microbiome to Inflammatory Cytokine Production Capacity	Cell	PRJNA319574	SAMN06110108	Illumina HiSeq 2000	PAIRED	Healthy	Healthy	Adult	N/A	N/A	N/A	N/A	N/A	N/A	N/A	N/A	N/A	N/A	N/A	N/A
Schirmer (2016)	Linking the Human Gut Microbiome to Inflammatory Cytokine Production Capacity	Cell	PRJNA319574	SAMN06110069	Illumina HiSeq 2000	PAIRED	Healthy	Healthy	Adult	N/A	N/A	N/A	N/A	N/A	N/A	N/A	N/A	N/A	N/A	N/A	N/A
Schirmer (2016)	Linking the Human Gut Microbiome to Inflammatory Cytokine Production Capacity	Cell	PRJNA319574	SAMN06110329	Illumina HiSeq 2000	PAIRED	Healthy	Healthy	Adult	N/A	N/A	N/A	N/A	N/A	N/A	N/A	N/A	N/A	N/A	N/A	N/A
Schirmer (2016)	Linking the Human Gut Microbiome to Inflammatory Cytokine Production Capacity	Cell	PRJNA319574	SAMN06110169	Illumina HiSeq 2000	PAIRED	Healthy	Healthy	Adult	N/A	N/A	N/A	N/A	N/A	N/A	N/A	N/A	N/A	N/A	N/A	N/A
Schirmer (2016)	Linking the Human Gut Microbiome to Inflammatory Cytokine Production Capacity	Cell	PRJNA319574	SAMN06110298	Illumina HiSeq 2000	PAIRED	Healthy	Healthy	Adult	N/A	N/A	N/A	N/A	N/A	N/A	N/A	N/A	N/A	N/A	N/A	N/A
Schirmer (2016)	Linking the Human Gut Microbiome to Inflammatory Cytokine Production Capacity	Cell	PRJNA319574	SAMN06110128	Illumina HiSeq 2000	PAIRED	Healthy	Healthy	Adult	N/A	N/A	N/A	N/A	N/A	N/A	N/A	N/A	N/A	N/A	N/A	N/A
Schirmer (2016)	Linking the Human Gut Microbiome to Inflammatory Cytokine Production Capacity	Cell	PRJNA319574	SAMN06110464	Illumina HiSeq 2000	PAIRED	Healthy	Healthy	Adult	N/A	N/A	N/A	N/A	N/A	N/A	N/A	N/A	N/A	N/A	N/A	N/A
Schirmer (2016)	Linking the Human Gut Microbiome to Inflammatory Cytokine Production Capacity	Cell	PRJNA319574	SAMN06110073	Illumina HiSeq 2000	PAIRED	Healthy	Healthy	Adult	N/A	N/A	N/A	N/A	N/A	N/A	N/A	N/A	N/A	N/A	N/A	N/A
Schirmer (2016)	Linking the Human Gut Microbiome to Inflammatory Cytokine Production Capacity	Cell	PRJNA319574	SAMN06110462	Illumina HiSeq 2000	PAIRED	Healthy	Healthy	Adult	N/A	N/A	N/A	N/A	N/A	N/A	N/A	N/A	N/A	N/A	N/A	N/A
Schirmer (2016)	Linking the Human Gut Microbiome to Inflammatory Cytokine Production Capacity	Cell	PRJNA319574	SAMN06110075	Illumina HiSeq 2000	PAIRED	Healthy	Healthy	Adult	N/A	N/A	N/A	N/A	N/A	N/A	N/A	N/A	N/A	N/A	N/A	N/A
Schirmer (2016)	Linking the Human Gut Microbiome to Inflammatory Cytokine Production Capacity	Cell	PRJNA319574	SAMN06110240	Illumina HiSeq 2000	PAIRED	Healthy	Healthy	Adult	N/A	N/A	N/A	N/A	N/A	N/A	N/A	N/A	N/A	N/A	N/A	N/A
Schirmer (2016)	Linking the Human Gut Microbiome to Inflammatory Cytokine Production Capacity	Cell	PRJNA319574	SAMN06110172	Illumina HiSeq 2000	PAIRED	Healthy	Healthy	Adult	N/A	N/A	N/A	N/A	N/A	N/A	N/A	N/A	N/A	N/A	N/A	N/A
Schirmer (2016)	Linking the Human Gut Microbiome to Inflammatory Cytokine Production Capacity	Cell	PRJNA319574	SAMN06110139	Illumina HiSeq 2000	PAIRED	Healthy	Healthy	Adult	N/A	N/A	N/A	N/A	N/A	N/A	N/A	N/A	N/A	N/A	N/A	N/A
Schirmer (2016)	Linking the Human Gut Microbiome to Inflammatory Cytokine Production Capacity	Cell	PRJNA319574	SAMN06110380	Illumina HiSeq 2000	PAIRED	Healthy	Healthy	Adult	N/A	N/A	N/A	N/A	N/A	N/A	N/A	N/A	N/A	N/A	N/A	N/A
Schirmer (2016)	Linking the Human Gut Microbiome to Inflammatory Cytokine Production Capacity	Cell	PRJNA319574	SAMN06110286	Illumina HiSeq 2000	PAIRED	Healthy	Healthy	Adult	N/A	N/A	N/A	N/A	N/A	N/A	N/A	N/A	N/A	N/A	N/A	N/A
Schirmer (2016)	Linking the Human Gut Microbiome to Inflammatory Cytokine Production Capacity	Cell	PRJNA319574	SAMN06110016	Illumina HiSeq 2000	PAIRED	Healthy	Healthy	Adult	N/A	N/A	N/A	N/A	N/A	N/A	N/A	N/A	N/A	N/A	N/A	N/A
Schirmer (2016)	Linking the Human Gut Microbiome to Inflammatory Cytokine Production Capacity	Cell	PRJNA319574	SAMN06110324	Illumina HiSeq 2000	PAIRED	Healthy	Healthy	Adult	N/A	N/A	N/A	N/A	N/A	N/A	N/A	N/A	N/A	N/A	N/A	N/A
Schirmer (2016)	Linking the Human Gut Microbiome to Inflammatory Cytokine Production Capacity	Cell	PRJNA319574	SAMN06110068	Illumina HiSeq 2000	PAIRED	Healthy	Healthy	Adult	N/A	N/A	N/A	N/A	N/A	N/A	N/A	N/A	N/A	N/A	N/A	N/A
Schirmer (2016)	Linking the Human Gut Microbiome to Inflammatory Cytokine Production Capacity	Cell	PRJNA319574	SAMN06110340	Illumina HiSeq 2000	PAIRED	Healthy	Healthy	Adult	N/A	N/A	N/A	N/A	N/A	N/A	N/A	N/A	N/A	N/A	N/A	N/A
Schirmer (2016)	Linking the Human Gut Microbiome to Inflammatory Cytokine Production Capacity	Cell	PRJNA319574	SAMN06110386	Illumina HiSeq 2000	PAIRED	Healthy	Healthy	Adult	N/A	N/A	N/A	N/A	N/A	N/A	N/A	N/A	N/A	N/A	N/A	N/A
Schirmer (2016)	Linking the Human Gut Microbiome to Inflammatory Cytokine Production Capacity	Cell	PRJNA319574	SAMN06110370	Illumina HiSeq 2000	PAIRED	Healthy	Healthy	Adult	N/A	N/A	N/A	N/A	N/A	N/A	N/A	N/A	N/A	N/A	N/A	N/A
Schirmer (2016)	Linking the Human Gut Microbiome to Inflammatory Cytokine Production Capacity	Cell	PRJNA319574	SAMN06110402	Illumina HiSeq 2000	PAIRED	Healthy	Healthy	Adult	N/A	N/A	N/A	N/A	N/A	N/A	N/A	N/A	N/A	N/A	N/A	N/A
Schirmer (2016)	Linking the Human Gut Microbiome to Inflammatory Cytokine Production Capacity	Cell	PRJNA319574	SAMN06110019	Illumina HiSeq 2000	PAIRED	Healthy	Healthy	Adult	N/A	N/A	N/A	N/A	N/A	N/A	N/A	N/A	N/A	N/A	N/A	N/A
Schirmer (2016)	Linking the Human Gut Microbiome to Inflammatory Cytokine Production Capacity	Cell	PRJNA319574	SAMN06110003	Illumina HiSeq 2000	PAIRED	Healthy	Healthy	Adult	N/A	N/A	N/A	N/A	N/A	N/A	N/A	N/A	N/A	N/A	N/A	N/A
Schirmer (2016)	Linking the Human Gut Microbiome to Inflammatory Cytokine Production Capacity	Cell	PRJNA319574	SAMN06110241	Illumina HiSeq 2000	PAIRED	Healthy	Healthy	Adult	N/A	N/A	N/A	N/A	N/A	N/A	N/A	N/A	N/A	N/A	N/A	N/A
Schirmer (2016)	Linking the Human Gut Microbiome to Inflammatory Cytokine Production Capacity	Cell	PRJNA319574	SAMN06110366	Illumina HiSeq 2000	PAIRED	Healthy	Healthy	Adult	N/A	N/A	N/A	N/A	N/A	N/A	N/A	N/A	N/A	N/A	N/A	N/A
Schirmer (2016)	Linking the Human Gut Microbiome to Inflammatory Cytokine Production Capacity	Cell	PRJNA319574	SAMN06110022	Illumina HiSeq 2000	PAIRED	Healthy	Healthy	Adult	N/A	N/A	N/A	N/A	N/A	N/A	N/A	N/A	N/A	N/A	N/A	N/A
Schirmer (2016)	Linking the Human Gut Microbiome to Inflammatory Cytokine Production Capacity	Cell	PRJNA319574	SAMN06110448	Illumina HiSeq 2000	PAIRED	Healthy	Healthy	Adult	N/A	N/A	N/A	N/A	N/A	N/A	N/A	N/A	N/A	N/A	N/A	N/A
Schirmer (2016)	Linking the Human Gut Microbiome to Inflammatory Cytokine Production Capacity	Cell	PRJNA319574	SAMN06110375	Illumina HiSeq 2000	PAIRED	Healthy	Healthy	Adult	N/A	N/A	N/A	N/A	N/A	N/A	N/A	N/A	N/A	N/A	N/A	N/A
Schirmer (2016)	Linking the Human Gut Microbiome to Inflammatory Cytokine Production Capacity	Cell	PRJNA319574	SAMN06110373	Illumina HiSeq 2000	PAIRED	Healthy	Healthy	Adult	N/A	N/A	N/A	N/A	N/A	N/A	N/A	N/A	N/A	N/A	N/A	N/A
Schirmer (2016)	Linking the Human Gut Microbiome to Inflammatory Cytokine Production Capacity	Cell	PRJNA319574	SAMN06110260	Illumina HiSeq 2000	PAIRED	Healthy	Healthy	Adult	N/A	N/A	N/A	N/A	N/A	N/A	N/A	N/A	N/A	N/A	N/A	N/A
Schirmer (2016)	Linking the Human Gut Microbiome to Inflammatory Cytokine Production Capacity	Cell	PRJNA319574	SAMN06110429	Illumina HiSeq 2000	PAIRED	Healthy	Healthy	Adult	N/A	N/A	N/A	N/A	N/A	N/A	N/A	N/A	N/A	N/A	N/A	N/A
Schirmer (2016)	Linking the Human Gut Microbiome to Inflammatory Cytokine Production Capacity	Cell	PRJNA319574	SAMN06110431	Illumina HiSeq 2000	PAIRED	Healthy	Healthy	Adult	N/A	N/A	N/A	N/A	N/A	N/A	N/A	N/A	N/A	N/A	N/A	N/A
Schirmer (2016)	Linking the Human Gut Microbiome to Inflammatory Cytokine Production Capacity	Cell	PRJNA319574	SAMN06110144	Illumina HiSeq 2000	PAIRED	Healthy	Healthy	Adult	N/A	N/A	N/A	N/A	N/A	N/A	N/A	N/A	N/A	N/A	N/A	N/A
Schirmer (2016)	Linking the Human Gut Microbiome to Inflammatory Cytokine Production Capacity	Cell	PRJNA319574	SAMN06110043	Illumina HiSeq 2000	PAIRED	Healthy	Healthy	Adult	N/A	N/A	N/A	N/A	N/A	N/A	N/A	N/A	N/A	N/A	N/A	N/A
Schirmer (2016)	Linking the Human Gut Microbiome to Inflammatory Cytokine Production Capacity	Cell	PRJNA319574	SAMN06110118	Illumina HiSeq 2000	PAIRED	Healthy	Healthy	Adult	N/A	N/A	N/A	N/A	N/A	N/A	N/A	N/A	N/A	N/A	N/A	N/A
Schirmer (2016)	Linking the Human Gut Microbiome to Inflammatory Cytokine Production Capacity	Cell	PRJNA319574	SAMN06110097	Illumina HiSeq 2000	PAIRED	Healthy	Healthy	Adult	N/A	N/A	N/A	N/A	N/A	N/A	N/A	N/A	N/A	N/A	N/A	N/A
Schirmer (2016)	Linking the Human Gut Microbiome to Inflammatory Cytokine Production Capacity	Cell	PRJNA319574	SAMN06110134	Illumina HiSeq 2000	PAIRED	Healthy	Healthy	Adult	N/A	N/A	N/A	N/A	N/A	N/A	N/A	N/A	N/A	N/A	N/A	N/A
Schirmer (2016)	Linking the Human Gut Microbiome to Inflammatory Cytokine Production Capacity	Cell	PRJNA319574	SAMN06110170	Illumina HiSeq 2000	PAIRED	Healthy	Healthy	Adult	N/A	N/A	N/A	N/A	N/A	N/A	N/A	N/A	N/A	N/A	N/A	N/A
Schirmer (2016)	Linking the Human Gut Microbiome to Inflammatory Cytokine Production Capacity	Cell	PRJNA319574	SAMN06110447	Illumina HiSeq 2000	PAIRED	Healthy	Healthy	Adult	N/A	N/A	N/A	N/A	N/A	N/A	N/A	N/A	N/A	N/A	N/A	N/A
Schirmer (2016)	Linking the Human Gut Microbiome to Inflammatory Cytokine Production Capacity	Cell	PRJNA319574	SAMN06110096	Illumina HiSeq 2000	PAIRED	Healthy	Healthy	Adult	N/A	N/A	N/A	N/A	N/A	N/A	N/A	N/A	N/A	N/A	N/A	N/A
Schirmer (2016)	Linking the Human Gut Microbiome to Inflammatory Cytokine Production Capacity	Cell	PRJNA319574	SAMN06110250	Illumina HiSeq 2000	PAIRED	Healthy	Healthy	Adult	N/A	N/A	N/A	N/A	N/A	N/A	N/A	N/A	N/A	N/A	N/A	N/A
Schirmer (2016)	Linking the Human Gut Microbiome to Inflammatory Cytokine Production Capacity	Cell	PRJNA319574	SAMN06110063	Illumina HiSeq 2000	PAIRED	Healthy	Healthy	Adult	N/A	N/A	N/A	N/A	N/A	N/A	N/A	N/A	N/A	N/A	N/A	N/A
Schirmer (2016)	Linking the Human Gut Microbiome to Inflammatory Cytokine Production Capacity	Cell	PRJNA319574	SAMN06110186	Illumina HiSeq 2000	PAIRED	Healthy	Healthy	Adult	N/A	N/A	N/A	N/A	N/A	N/A	N/A	N/A	N/A	N/A	N/A	N/A
Schirmer (2016)	Linking the Human Gut Microbiome to Inflammatory Cytokine Production Capacity	Cell	PRJNA319574	SAMN06110138	Illumina HiSeq 2000	PAIRED	Healthy	Healthy	Adult	N/A	N/A	N/A	N/A	N/A	N/A	N/A	N/A	N/A	N/A	N/A	N/A
Schirmer (2016)	Linking the Human Gut Microbiome to Inflammatory Cytokine Production Capacity	Cell	PRJNA319574	SAMN06110331	Illumina HiSeq 2000	PAIRED	Healthy	Healthy	Adult	N/A	N/A	N/A	N/A	N/A	N/A	N/A	N/A	N/A	N/A	N/A	N/A
Schirmer (2016)	Linking the Human Gut Microbiome to Inflammatory Cytokine Production Capacity	Cell	PRJNA319574	SAMN06110356	Illumina HiSeq 2000	PAIRED	Healthy	Healthy	Adult	N/A	N/A	N/A	N/A	N/A	N/A	N/A	N/A	N/A	N/A	N/A	N/A
Schirmer (2016)	Linking the Human Gut Microbiome to Inflammatory Cytokine Production Capacity	Cell	PRJNA319574	SAMN06110087	Illumina HiSeq 2000	PAIRED	Healthy	Healthy	Adult	N/A	N/A	N/A	N/A	N/A	N/A	N/A	N/A	N/A	N/A	N/A	N/A
Schirmer (2016)	Linking the Human Gut Microbiome to Inflammatory Cytokine Production Capacity	Cell	PRJNA319574	SAMN06110362	Illumina HiSeq 2000	PAIRED	Healthy	Healthy	Adult	N/A	N/A	N/A	N/A	N/A	N/A	N/A	N/A	N/A	N/A	N/A	N/A
Schirmer (2016)	Linking the Human Gut Microbiome to Inflammatory Cytokine Production Capacity	Cell	PRJNA319574	SAMN06110202	Illumina HiSeq 2000	PAIRED	Healthy	Healthy	Adult	N/A	N/A	N/A	N/A	N/A	N/A	N/A	N/A	N/A	N/A	N/A	N/A
Schirmer (2016)	Linking the Human Gut Microbiome to Inflammatory Cytokine Production Capacity	Cell	PRJNA319574	SAMN06110234	Illumina HiSeq 2000	PAIRED	Healthy	Healthy	Adult	N/A	N/A	N/A	N/A	N/A	N/A	N/A	N/A	N/A	N/A	N/A	N/A
Schirmer (2016)	Linking the Human Gut Microbiome to Inflammatory Cytokine Production Capacity	Cell	PRJNA319574	SAMN06110057	Illumina HiSeq 2000	PAIRED	Healthy	Healthy	Adult	N/A	N/A	N/A	N/A	N/A	N/A	N/A	N/A	N/A	N/A	N/A	N/A
Schirmer (2016)	Linking the Human Gut Microbiome to Inflammatory Cytokine Production Capacity	Cell	PRJNA319574	SAMN06110443	Illumina HiSeq 2000	PAIRED	Healthy	Healthy	Adult	N/A	N/A	N/A	N/A	N/A	N/A	N/A	N/A	N/A	N/A	N/A	N/A
Schirmer (2016)	Linking the Human Gut Microbiome to Inflammatory Cytokine Production Capacity	Cell	PRJNA319574	SAMN06110082	Illumina HiSeq 2000	PAIRED	Healthy	Healthy	Adult	N/A	N/A	N/A	N/A	N/A	N/A	N/A	N/A	N/A	N/A	N/A	N/A
Schirmer (2016)	Linking the Human Gut Microbiome to Inflammatory Cytokine Production Capacity	Cell	PRJNA319574	SAMN06110412	Illumina HiSeq 2000	PAIRED	Healthy	Healthy	Adult	N/A	N/A	N/A	N/A	N/A	N/A	N/A	N/A	N/A	N/A	N/A	N/A
Schirmer (2016)	Linking the Human Gut Microbiome to Inflammatory Cytokine Production Capacity	Cell	PRJNA319574	SAMN06110437	Illumina HiSeq 2000	PAIRED	Healthy	Healthy	Adult	N/A	N/A	N/A	N/A	N/A	N/A	N/A	N/A	N/A	N/A	N/A	N/A
Schirmer (2016)	Linking the Human Gut Microbiome to Inflammatory Cytokine Production Capacity	Cell	PRJNA319574	SAMN06110201	Illumina HiSeq 2000	PAIRED	Healthy	Healthy	Adult	N/A	N/A	N/A	N/A	N/A	N/A	N/A	N/A	N/A	N/A	N/A	N/A
Schirmer (2016)	Linking the Human Gut Microbiome to Inflammatory Cytokine Production Capacity	Cell	PRJNA319574	SAMN06110320	Illumina HiSeq 2000	PAIRED	Healthy	Healthy	Adult	N/A	N/A	N/A	N/A	N/A	N/A	N/A	N/A	N/A	N/A	N/A	N/A
Schirmer (2016)	Linking the Human Gut Microbiome to Inflammatory Cytokine Production Capacity	Cell	PRJNA319574	SAMN06110099	Illumina HiSeq 2000	PAIRED	Healthy	Healthy	Adult	N/A	N/A	N/A	N/A	N/A	N/A	N/A	N/A	N/A	N/A	N/A	N/A
Schirmer (2016)	Linking the Human Gut Microbiome to Inflammatory Cytokine Production Capacity	Cell	PRJNA319574	SAMN06110151	Illumina HiSeq 2000	PAIRED	Healthy	Healthy	Adult	N/A	N/A	N/A	N/A	N/A	N/A	N/A	N/A	N/A	N/A	N/A	N/A
Schirmer (2016)	Linking the Human Gut Microbiome to Inflammatory Cytokine Production Capacity	Cell	PRJNA319574	SAMN06110142	Illumina HiSeq 2000	PAIRED	Healthy	Healthy	Adult	N/A	N/A	N/A	N/A	N/A	N/A	N/A	N/A	N/A	N/A	N/A	N/A
Schirmer (2016)	Linking the Human Gut Microbiome to Inflammatory Cytokine Production Capacity	Cell	PRJNA319574	SAMN06110205	Illumina HiSeq 2000	PAIRED	Healthy	Healthy	Adult	N/A	N/A	N/A	N/A	N/A	N/A	N/A	N/A	N/A	N/A	N/A	N/A
Schirmer (2016)	Linking the Human Gut Microbiome to Inflammatory Cytokine Production Capacity	Cell	PRJNA319574	SAMN06110059	Illumina HiSeq 2000	PAIRED	Healthy	Healthy	Adult	N/A	N/A	N/A	N/A	N/A	N/A	N/A	N/A	N/A	N/A	N/A	N/A
Schirmer (2016)	Linking the Human Gut Microbiome to Inflammatory Cytokine Production Capacity	Cell	PRJNA319574	SAMN06110148	Illumina HiSeq 2000	PAIRED	Healthy	Healthy	Adult	N/A	N/A	N/A	N/A	N/A	N/A	N/A	N/A	N/A	N/A	N/A	N/A
Schirmer (2016)	Linking the Human Gut Microbiome to Inflammatory Cytokine Production Capacity	Cell	PRJNA319574	SAMN06110338	Illumina HiSeq 2000	PAIRED	Healthy	Healthy	Adult	N/A	N/A	N/A	N/A	N/A	N/A	N/A	N/A	N/A	N/A	N/A	N/A
Schirmer (2016)	Linking the Human Gut Microbiome to Inflammatory Cytokine Production Capacity	Cell	PRJNA319574	SAMN06110410	Illumina HiSeq 2000	PAIRED	Healthy	Healthy	Adult	N/A	N/A	N/A	N/A	N/A	N/A	N/A	N/A	N/A	N/A	N/A	N/A
Schirmer (2016)	Linking the Human Gut Microbiome to Inflammatory Cytokine Production Capacity	Cell	PRJNA319574	SAMN06110140	Illumina HiSeq 2000	PAIRED	Healthy	Healthy	Adult	N/A	N/A	N/A	N/A	N/A	N/A	N/A	N/A	N/A	N/A	N/A	N/A
Schirmer (2016)	Linking the Human Gut Microbiome to Inflammatory Cytokine Production Capacity	Cell	PRJNA319574	SAMN06110398	Illumina HiSeq 2000	PAIRED	Healthy	Healthy	Adult	N/A	N/A	N/A	N/A	N/A	N/A	N/A	N/A	N/A	N/A	N/A	N/A
Schirmer (2016)	Linking the Human Gut Microbiome to Inflammatory Cytokine Production Capacity	Cell	PRJNA319574	SAMN06110434	Illumina HiSeq 2000	PAIRED	Healthy	Healthy	Adult	N/A	N/A	N/A	N/A	N/A	N/A	N/A	N/A	N/A	N/A	N/A	N/A
Schirmer (2016)	Linking the Human Gut Microbiome to Inflammatory Cytokine Production Capacity	Cell	PRJNA319574	SAMN06110430	Illumina HiSeq 2000	PAIRED	Healthy	Healthy	Adult	N/A	N/A	N/A	N/A	N/A	N/A	N/A	N/A	N/A	N/A	N/A	N/A
Schirmer (2016)	Linking the Human Gut Microbiome to Inflammatory Cytokine Production Capacity	Cell	PRJNA319574	SAMN06110044	Illumina HiSeq 2000	PAIRED	Healthy	Healthy	Adult	N/A	N/A	N/A	N/A	N/A	N/A	N/A	N/A	N/A	N/A	N/A	N/A
Schirmer (2016)	Linking the Human Gut Microbiome to Inflammatory Cytokine Production Capacity	Cell	PRJNA319574	SAMN06110258	Illumina HiSeq 2000	PAIRED	Healthy	Healthy	Adult	N/A	N/A	N/A	N/A	N/A	N/A	N/A	N/A	N/A	N/A	N/A	N/A
Schirmer (2016)	Linking the Human Gut Microbiome to Inflammatory Cytokine Production Capacity	Cell	PRJNA319574	SAMN06110242	Illumina HiSeq 2000	PAIRED	Healthy	Healthy	Adult	N/A	N/A	N/A	N/A	N/A	N/A	N/A	N/A	N/A	N/A	N/A	N/A
Schirmer (2016)	Linking the Human Gut Microbiome to Inflammatory Cytokine Production Capacity	Cell	PRJNA319574	SAMN06110406	Illumina HiSeq 2000	PAIRED	Healthy	Healthy	Adult	N/A	N/A	N/A	N/A	N/A	N/A	N/A	N/A	N/A	N/A	N/A	N/A
Schirmer (2016)	Linking the Human Gut Microbiome to Inflammatory Cytokine Production Capacity	Cell	PRJNA319574	SAMN06110154	Illumina HiSeq 2000	PAIRED	Healthy	Healthy	Adult	N/A	N/A	N/A	N/A	N/A	N/A	N/A	N/A	N/A	N/A	N/A	N/A
Schirmer (2016)	Linking the Human Gut Microbiome to Inflammatory Cytokine Production Capacity	Cell	PRJNA319574	SAMN06110316	Illumina HiSeq 2000	PAIRED	Healthy	Healthy	Adult	N/A	N/A	N/A	N/A	N/A	N/A	N/A	N/A	N/A	N/A	N/A	N/A
Schirmer (2016)	Linking the Human Gut Microbiome to Inflammatory Cytokine Production Capacity	Cell	PRJNA319574	SAMN06110315	Illumina HiSeq 2000	PAIRED	Healthy	Healthy	Adult	N/A	N/A	N/A	N/A	N/A	N/A	N/A	N/A	N/A	N/A	N/A	N/A
Schirmer (2016)	Linking the Human Gut Microbiome to Inflammatory Cytokine Production Capacity	Cell	PRJNA319574	SAMN06110270	Illumina HiSeq 2000	PAIRED	Healthy	Healthy	Adult	N/A	N/A	N/A	N/A	N/A	N/A	N/A	N/A	N/A	N/A	N/A	N/A
Schirmer (2016)	Linking the Human Gut Microbiome to Inflammatory Cytokine Production Capacity	Cell	PRJNA319574	SAMN06110088	Illumina HiSeq 2000	PAIRED	Healthy	Healthy	Adult	N/A	N/A	N/A	N/A	N/A	N/A	N/A	N/A	N/A	N/A	N/A	N/A
Schirmer (2016)	Linking the Human Gut Microbiome to Inflammatory Cytokine Production Capacity	Cell	PRJNA319574	SAMN06110137	Illumina HiSeq 2000	PAIRED	Healthy	Healthy	Adult	N/A	N/A	N/A	N/A	N/A	N/A	N/A	N/A	N/A	N/A	N/A	N/A
Schirmer (2016)	Linking the Human Gut Microbiome to Inflammatory Cytokine Production Capacity	Cell	PRJNA319574	SAMN06110278	Illumina HiSeq 2000	PAIRED	Healthy	Healthy	Adult	N/A	N/A	N/A	N/A	N/A	N/A	N/A	N/A	N/A	N/A	N/A	N/A
Schirmer (2016)	Linking the Human Gut Microbiome to Inflammatory Cytokine Production Capacity	Cell	PRJNA319574	SAMN06110235	Illumina HiSeq 2000	PAIRED	Healthy	Healthy	Adult	N/A	N/A	N/A	N/A	N/A	N/A	N/A	N/A	N/A	N/A	N/A	N/A
Schirmer (2016)	Linking the Human Gut Microbiome to Inflammatory Cytokine Production Capacity	Cell	PRJNA319574	SAMN06110427	Illumina HiSeq 2000	PAIRED	Healthy	Healthy	Adult	N/A	N/A	N/A	N/A	N/A	N/A	N/A	N/A	N/A	N/A	N/A	N/A
Schirmer (2016)	Linking the Human Gut Microbiome to Inflammatory Cytokine Production Capacity	Cell	PRJNA319574	SAMN06110405	Illumina HiSeq 2000	PAIRED	Healthy	Healthy	Adult	N/A	N/A	N/A	N/A	N/A	N/A	N/A	N/A	N/A	N/A	N/A	N/A
Schirmer (2016)	Linking the Human Gut Microbiome to Inflammatory Cytokine Production Capacity	Cell	PRJNA319574	SAMN06110197	Illumina HiSeq 2000	PAIRED	Healthy	Healthy	Adult	N/A	N/A	N/A	N/A	N/A	N/A	N/A	N/A	N/A	N/A	N/A	N/A
Schirmer (2016)	Linking the Human Gut Microbiome to Inflammatory Cytokine Production Capacity	Cell	PRJNA319574	SAMN06110047	Illumina HiSeq 2000	PAIRED	Healthy	Healthy	Adult	N/A	N/A	N/A	N/A	N/A	N/A	N/A	N/A	N/A	N/A	N/A	N/A
Schirmer (2016)	Linking the Human Gut Microbiome to Inflammatory Cytokine Production Capacity	Cell	PRJNA319574	SAMN06110195	Illumina HiSeq 2000	PAIRED	Healthy	Healthy	Adult	N/A	N/A	N/A	N/A	N/A	N/A	N/A	N/A	N/A	N/A	N/A	N/A
Schirmer (2016)	Linking the Human Gut Microbiome to Inflammatory Cytokine Production Capacity	Cell	PRJNA319574	SAMN06110113	Illumina HiSeq 2000	PAIRED	Healthy	Healthy	Adult	N/A	N/A	N/A	N/A	N/A	N/A	N/A	N/A	N/A	N/A	N/A	N/A
Schirmer (2016)	Linking the Human Gut Microbiome to Inflammatory Cytokine Production Capacity	Cell	PRJNA319574	SAMN06110127	Illumina HiSeq 2000	PAIRED	Healthy	Healthy	Adult	N/A	N/A	N/A	N/A	N/A	N/A	N/A	N/A	N/A	N/A	N/A	N/A
Schirmer (2016)	Linking the Human Gut Microbiome to Inflammatory Cytokine Production Capacity	Cell	PRJNA319574	SAMN06110176	Illumina HiSeq 2000	PAIRED	Healthy	Healthy	Adult	N/A	N/A	N/A	N/A	N/A	N/A	N/A	N/A	N/A	N/A	N/A	N/A
Schirmer (2016)	Linking the Human Gut Microbiome to Inflammatory Cytokine Production Capacity	Cell	PRJNA319574	SAMN06110389	Illumina HiSeq 2000	PAIRED	Healthy	Healthy	Adult	N/A	N/A	N/A	N/A	N/A	N/A	N/A	N/A	N/A	N/A	N/A	N/A
Schirmer (2016)	Linking the Human Gut Microbiome to Inflammatory Cytokine Production Capacity	Cell	PRJNA319574	SAMN06110026	Illumina HiSeq 2000	PAIRED	Healthy	Healthy	Adult	N/A	N/A	N/A	N/A	N/A	N/A	N/A	N/A	N/A	N/A	N/A	N/A
Schirmer (2016)	Linking the Human Gut Microbiome to Inflammatory Cytokine Production Capacity	Cell	PRJNA319574	SAMN06110114	Illumina HiSeq 2000	PAIRED	Healthy	Healthy	Adult	N/A	N/A	N/A	N/A	N/A	N/A	N/A	N/A	N/A	N/A	N/A	N/A
Schirmer (2016)	Linking the Human Gut Microbiome to Inflammatory Cytokine Production Capacity	Cell	PRJNA319574	SAMN06110085	Illumina HiSeq 2000	PAIRED	Healthy	Healthy	Adult	N/A	N/A	N/A	N/A	N/A	N/A	N/A	N/A	N/A	N/A	N/A	N/A
Schirmer (2016)	Linking the Human Gut Microbiome to Inflammatory Cytokine Production Capacity	Cell	PRJNA319574	SAMN06110064	Illumina HiSeq 2000	PAIRED	Healthy	Healthy	Adult	N/A	N/A	N/A	N/A	N/A	N/A	N/A	N/A	N/A	N/A	N/A	N/A
Schirmer (2016)	Linking the Human Gut Microbiome to Inflammatory Cytokine Production Capacity	Cell	PRJNA319574	SAMN06110244	Illumina HiSeq 2000	PAIRED	Healthy	Healthy	Adult	N/A	N/A	N/A	N/A	N/A	N/A	N/A	N/A	N/A	N/A	N/A	N/A
Schirmer (2016)	Linking the Human Gut Microbiome to Inflammatory Cytokine Production Capacity	Cell	PRJNA319574	SAMN06110122	Illumina HiSeq 2000	PAIRED	Healthy	Healthy	Adult	N/A	N/A	N/A	N/A	N/A	N/A	N/A	N/A	N/A	N/A	N/A	N/A
Schirmer (2016)	Linking the Human Gut Microbiome to Inflammatory Cytokine Production Capacity	Cell	PRJNA319574	SAMN06110249	Illumina HiSeq 2000	PAIRED	Healthy	Healthy	Adult	N/A	N/A	N/A	N/A	N/A	N/A	N/A	N/A	N/A	N/A	N/A	N/A
Schirmer (2016)	Linking the Human Gut Microbiome to Inflammatory Cytokine Production Capacity	Cell	PRJNA319574	SAMN06110222	Illumina HiSeq 2000	PAIRED	Healthy	Healthy	Adult	N/A	N/A	N/A	N/A	N/A	N/A	N/A	N/A	N/A	N/A	N/A	N/A
Schirmer (2016)	Linking the Human Gut Microbiome to Inflammatory Cytokine Production Capacity	Cell	PRJNA319574	SAMN06110053	Illumina HiSeq 2000	PAIRED	Healthy	Healthy	Adult	N/A	N/A	N/A	N/A	N/A	N/A	N/A	N/A	N/A	N/A	N/A	N/A
Schirmer (2016)	Linking the Human Gut Microbiome to Inflammatory Cytokine Production Capacity	Cell	PRJNA319574	SAMN06110007	Illumina HiSeq 2000	PAIRED	Healthy	Healthy	Adult	N/A	N/A	N/A	N/A	N/A	N/A	N/A	N/A	N/A	N/A	N/A	N/A
Schirmer (2016)	Linking the Human Gut Microbiome to Inflammatory Cytokine Production Capacity	Cell	PRJNA319574	SAMN06110158	Illumina HiSeq 2000	PAIRED	Healthy	Healthy	Adult	N/A	N/A	N/A	N/A	N/A	N/A	N/A	N/A	N/A	N/A	N/A	N/A
Schirmer (2016)	Linking the Human Gut Microbiome to Inflammatory Cytokine Production Capacity	Cell	PRJNA319574	SAMN06110453	Illumina HiSeq 2000	PAIRED	Healthy	Healthy	Adult	N/A	N/A	N/A	N/A	N/A	N/A	N/A	N/A	N/A	N/A	N/A	N/A
Schirmer (2016)	Linking the Human Gut Microbiome to Inflammatory Cytokine Production Capacity	Cell	PRJNA319574	SAMN06110125	Illumina HiSeq 2000	PAIRED	Healthy	Healthy	Adult	N/A	N/A	N/A	N/A	N/A	N/A	N/A	N/A	N/A	N/A	N/A	N/A
Schirmer (2016)	Linking the Human Gut Microbiome to Inflammatory Cytokine Production Capacity	Cell	PRJNA319574	SAMN06110456	Illumina HiSeq 2000	PAIRED	Healthy	Healthy	Adult	N/A	N/A	N/A	N/A	N/A	N/A	N/A	N/A	N/A	N/A	N/A	N/A
Schirmer (2016)	Linking the Human Gut Microbiome to Inflammatory Cytokine Production Capacity	Cell	PRJNA319574	SAMN06110304	Illumina HiSeq 2000	PAIRED	Healthy	Healthy	Adult	N/A	N/A	N/A	N/A	N/A	N/A	N/A	N/A	N/A	N/A	N/A	N/A
Schirmer (2016)	Linking the Human Gut Microbiome to Inflammatory Cytokine Production Capacity	Cell	PRJNA319574	SAMN06110173	Illumina HiSeq 2000	PAIRED	Healthy	Healthy	Adult	N/A	N/A	N/A	N/A	N/A	N/A	N/A	N/A	N/A	N/A	N/A	N/A
Schirmer (2016)	Linking the Human Gut Microbiome to Inflammatory Cytokine Production Capacity	Cell	PRJNA319574	SAMN06110194	Illumina HiSeq 2000	PAIRED	Healthy	Healthy	Adult	N/A	N/A	N/A	N/A	N/A	N/A	N/A	N/A	N/A	N/A	N/A	N/A
Schirmer (2016)	Linking the Human Gut Microbiome to Inflammatory Cytokine Production Capacity	Cell	PRJNA319574	SAMN06110313	Illumina HiSeq 2000	PAIRED	Healthy	Healthy	Adult	N/A	N/A	N/A	N/A	N/A	N/A	N/A	N/A	N/A	N/A	N/A	N/A
Schirmer (2016)	Linking the Human Gut Microbiome to Inflammatory Cytokine Production Capacity	Cell	PRJNA319574	SAMN06110382	Illumina HiSeq 2000	PAIRED	Healthy	Healthy	Adult	N/A	N/A	N/A	N/A	N/A	N/A	N/A	N/A	N/A	N/A	N/A	N/A
Schirmer (2016)	Linking the Human Gut Microbiome to Inflammatory Cytokine Production Capacity	Cell	PRJNA319574	SAMN06110343	Illumina HiSeq 2000	PAIRED	Healthy	Healthy	Adult	N/A	N/A	N/A	N/A	N/A	N/A	N/A	N/A	N/A	N/A	N/A	N/A
Schirmer (2016)	Linking the Human Gut Microbiome to Inflammatory Cytokine Production Capacity	Cell	PRJNA319574	SAMN06110420	Illumina HiSeq 2000	PAIRED	Healthy	Healthy	Adult	N/A	N/A	N/A	N/A	N/A	N/A	N/A	N/A	N/A	N/A	N/A	N/A
Schirmer (2016)	Linking the Human Gut Microbiome to Inflammatory Cytokine Production Capacity	Cell	PRJNA319574	SAMN06110461	Illumina HiSeq 2000	PAIRED	Healthy	Healthy	Adult	N/A	N/A	N/A	N/A	N/A	N/A	N/A	N/A	N/A	N/A	N/A	N/A
Schirmer (2016)	Linking the Human Gut Microbiome to Inflammatory Cytokine Production Capacity	Cell	PRJNA319574	SAMN06110344	Illumina HiSeq 2000	PAIRED	Healthy	Healthy	Adult	N/A	N/A	N/A	N/A	N/A	N/A	N/A	N/A	N/A	N/A	N/A	N/A
Schirmer (2016)	Linking the Human Gut Microbiome to Inflammatory Cytokine Production Capacity	Cell	PRJNA319574	SAMN06110199	Illumina HiSeq 2000	PAIRED	Healthy	Healthy	Adult	N/A	N/A	N/A	N/A	N/A	N/A	N/A	N/A	N/A	N/A	N/A	N/A
Schirmer (2016)	Linking the Human Gut Microbiome to Inflammatory Cytokine Production Capacity	Cell	PRJNA319574	SAMN06110126	Illumina HiSeq 2000	PAIRED	Healthy	Healthy	Adult	N/A	N/A	N/A	N/A	N/A	N/A	N/A	N/A	N/A	N/A	N/A	N/A
Schirmer (2016)	Linking the Human Gut Microbiome to Inflammatory Cytokine Production Capacity	Cell	PRJNA319574	SAMN06110206	Illumina HiSeq 2000	PAIRED	Healthy	Healthy	Adult	N/A	N/A	N/A	N/A	N/A	N/A	N/A	N/A	N/A	N/A	N/A	N/A
Schirmer (2016)	Linking the Human Gut Microbiome to Inflammatory Cytokine Production Capacity	Cell	PRJNA319574	SAMN06110171	Illumina HiSeq 2000	PAIRED	Healthy	Healthy	Adult	N/A	N/A	N/A	N/A	N/A	N/A	N/A	N/A	N/A	N/A	N/A	N/A
Schirmer (2016)	Linking the Human Gut Microbiome to Inflammatory Cytokine Production Capacity	Cell	PRJNA319574	SAMN06110146	Illumina HiSeq 2000	PAIRED	Healthy	Healthy	Adult	N/A	N/A	N/A	N/A	N/A	N/A	N/A	N/A	N/A	N/A	N/A	N/A
Schirmer (2016)	Linking the Human Gut Microbiome to Inflammatory Cytokine Production Capacity	Cell	PRJNA319574	SAMN06110223	Illumina HiSeq 2000	PAIRED	Healthy	Healthy	Adult	N/A	N/A	N/A	N/A	N/A	N/A	N/A	N/A	N/A	N/A	N/A	N/A
Schirmer (2016)	Linking the Human Gut Microbiome to Inflammatory Cytokine Production Capacity	Cell	PRJNA319574	SAMN06110403	Illumina HiSeq 2000	PAIRED	Healthy	Healthy	Adult	N/A	N/A	N/A	N/A	N/A	N/A	N/A	N/A	N/A	N/A	N/A	N/A
Schirmer (2016)	Linking the Human Gut Microbiome to Inflammatory Cytokine Production Capacity	Cell	PRJNA319574	SAMN06110318	Illumina HiSeq 2000	PAIRED	Healthy	Healthy	Adult	N/A	N/A	N/A	N/A	N/A	N/A	N/A	N/A	N/A	N/A	N/A	N/A
Schirmer (2016)	Linking the Human Gut Microbiome to Inflammatory Cytokine Production Capacity	Cell	PRJNA319574	SAMN06110045	Illumina HiSeq 2000	PAIRED	Healthy	Healthy	Adult	N/A	N/A	N/A	N/A	N/A	N/A	N/A	N/A	N/A	N/A	N/A	N/A
Schirmer (2016)	Linking the Human Gut Microbiome to Inflammatory Cytokine Production Capacity	Cell	PRJNA319574	SAMN06110432	Illumina HiSeq 2000	PAIRED	Healthy	Healthy	Adult	N/A	N/A	N/A	N/A	N/A	N/A	N/A	N/A	N/A	N/A	N/A	N/A
Schirmer (2016)	Linking the Human Gut Microbiome to Inflammatory Cytokine Production Capacity	Cell	PRJNA319574	SAMN06110180	Illumina HiSeq 2000	PAIRED	Healthy	Healthy	Adult	N/A	N/A	N/A	N/A	N/A	N/A	N/A	N/A	N/A	N/A	N/A	N/A
Schirmer (2016)	Linking the Human Gut Microbiome to Inflammatory Cytokine Production Capacity	Cell	PRJNA319574	SAMN06110454	Illumina HiSeq 2000	PAIRED	Healthy	Healthy	Adult	N/A	N/A	N/A	N/A	N/A	N/A	N/A	N/A	N/A	N/A	N/A	N/A
Schirmer (2016)	Linking the Human Gut Microbiome to Inflammatory Cytokine Production Capacity	Cell	PRJNA319574	SAMN06110162	Illumina HiSeq 2000	PAIRED	Healthy	Healthy	Adult	N/A	N/A	N/A	N/A	N/A	N/A	N/A	N/A	N/A	N/A	N/A	N/A
Schirmer (2016)	Linking the Human Gut Microbiome to Inflammatory Cytokine Production Capacity	Cell	PRJNA319574	SAMN06109999	Illumina HiSeq 2000	PAIRED	Healthy	Healthy	Adult	N/A	N/A	N/A	N/A	N/A	N/A	N/A	N/A	N/A	N/A	N/A	N/A
Schirmer (2016)	Linking the Human Gut Microbiome to Inflammatory Cytokine Production Capacity	Cell	PRJNA319574	SAMN06110102	Illumina HiSeq 2000	PAIRED	Healthy	Healthy	Adult	N/A	N/A	N/A	N/A	N/A	N/A	N/A	N/A	N/A	N/A	N/A	N/A
Schirmer (2016)	Linking the Human Gut Microbiome to Inflammatory Cytokine Production Capacity	Cell	PRJNA319574	SAMN06110314	Illumina HiSeq 2000	PAIRED	Healthy	Healthy	Adult	N/A	N/A	N/A	N/A	N/A	N/A	N/A	N/A	N/A	N/A	N/A	N/A
Schirmer (2016)	Linking the Human Gut Microbiome to Inflammatory Cytokine Production Capacity	Cell	PRJNA319574	SAMN06110289	Illumina HiSeq 2000	PAIRED	Healthy	Healthy	Adult	N/A	N/A	N/A	N/A	N/A	N/A	N/A	N/A	N/A	N/A	N/A	N/A
Schirmer (2016)	Linking the Human Gut Microbiome to Inflammatory Cytokine Production Capacity	Cell	PRJNA319574	SAMN06110445	Illumina HiSeq 2000	PAIRED	Healthy	Healthy	Adult	N/A	N/A	N/A	N/A	N/A	N/A	N/A	N/A	N/A	N/A	N/A	N/A
Schirmer (2016)	Linking the Human Gut Microbiome to Inflammatory Cytokine Production Capacity	Cell	PRJNA319574	SAMN06110328	Illumina HiSeq 2000	PAIRED	Healthy	Healthy	Adult	N/A	N/A	N/A	N/A	N/A	N/A	N/A	N/A	N/A	N/A	N/A	N/A
Schirmer (2016)	Linking the Human Gut Microbiome to Inflammatory Cytokine Production Capacity	Cell	PRJNA319574	SAMN06110428	Illumina HiSeq 2000	PAIRED	Healthy	Healthy	Adult	N/A	N/A	N/A	N/A	N/A	N/A	N/A	N/A	N/A	N/A	N/A	N/A
Schirmer (2016)	Linking the Human Gut Microbiome to Inflammatory Cytokine Production Capacity	Cell	PRJNA319574	SAMN06110200	Illumina HiSeq 2000	PAIRED	Healthy	Healthy	Adult	N/A	N/A	N/A	N/A	N/A	N/A	N/A	N/A	N/A	N/A	N/A	N/A
Schirmer (2016)	Linking the Human Gut Microbiome to Inflammatory Cytokine Production Capacity	Cell	PRJNA319574	SAMN06110213	Illumina HiSeq 2000	PAIRED	Healthy	Healthy	Adult	N/A	N/A	N/A	N/A	N/A	N/A	N/A	N/A	N/A	N/A	N/A	N/A
Schirmer (2016)	Linking the Human Gut Microbiome to Inflammatory Cytokine Production Capacity	Cell	PRJNA319574	SAMN06110145	Illumina HiSeq 2000	PAIRED	Healthy	Healthy	Adult	N/A	N/A	N/A	N/A	N/A	N/A	N/A	N/A	N/A	N/A	N/A	N/A
Schirmer (2016)	Linking the Human Gut Microbiome to Inflammatory Cytokine Production Capacity	Cell	PRJNA319574	SAMN06110196	Illumina HiSeq 2000	PAIRED	Healthy	Healthy	Adult	N/A	N/A	N/A	N/A	N/A	N/A	N/A	N/A	N/A	N/A	N/A	N/A
Schirmer (2016)	Linking the Human Gut Microbiome to Inflammatory Cytokine Production Capacity	Cell	PRJNA319574	SAMN06110179	Illumina HiSeq 2000	PAIRED	Healthy	Healthy	Adult	N/A	N/A	N/A	N/A	N/A	N/A	N/A	N/A	N/A	N/A	N/A	N/A
Schirmer (2016)	Linking the Human Gut Microbiome to Inflammatory Cytokine Production Capacity	Cell	PRJNA319574	SAMN06110322	Illumina HiSeq 2000	PAIRED	Healthy	Healthy	Adult	N/A	N/A	N/A	N/A	N/A	N/A	N/A	N/A	N/A	N/A	N/A	N/A
Schirmer (2016)	Linking the Human Gut Microbiome to Inflammatory Cytokine Production Capacity	Cell	PRJNA319574	SAMN06110247	Illumina HiSeq 2000	PAIRED	Healthy	Healthy	Adult	N/A	N/A	N/A	N/A	N/A	N/A	N/A	N/A	N/A	N/A	N/A	N/A
Schirmer (2016)	Linking the Human Gut Microbiome to Inflammatory Cytokine Production Capacity	Cell	PRJNA319574	SAMN06110459	Illumina HiSeq 2000	PAIRED	Healthy	Healthy	Adult	N/A	N/A	N/A	N/A	N/A	N/A	N/A	N/A	N/A	N/A	N/A	N/A
Schirmer (2016)	Linking the Human Gut Microbiome to Inflammatory Cytokine Production Capacity	Cell	PRJNA319574	SAMN06110207	Illumina HiSeq 2000	PAIRED	Healthy	Healthy	Adult	N/A	N/A	N/A	N/A	N/A	N/A	N/A	N/A	N/A	N/A	N/A	N/A
Schirmer (2016)	Linking the Human Gut Microbiome to Inflammatory Cytokine Production Capacity	Cell	PRJNA319574	SAMN06110110	Illumina HiSeq 2000	PAIRED	Healthy	Healthy	Adult	N/A	N/A	N/A	N/A	N/A	N/A	N/A	N/A	N/A	N/A	N/A	N/A
Schirmer (2016)	Linking the Human Gut Microbiome to Inflammatory Cytokine Production Capacity	Cell	PRJNA319574	SAMN06110339	Illumina HiSeq 2000	PAIRED	Healthy	Healthy	Adult	N/A	N/A	N/A	N/A	N/A	N/A	N/A	N/A	N/A	N/A	N/A	N/A
Schirmer (2016)	Linking the Human Gut Microbiome to Inflammatory Cytokine Production Capacity	Cell	PRJNA319574	SAMN06110276	Illumina HiSeq 2000	PAIRED	Healthy	Healthy	Adult	N/A	N/A	N/A	N/A	N/A	N/A	N/A	N/A	N/A	N/A	N/A	N/A
Schirmer (2016)	Linking the Human Gut Microbiome to Inflammatory Cytokine Production Capacity	Cell	PRJNA319574	SAMN06110029	Illumina HiSeq 2000	PAIRED	Healthy	Healthy	Adult	N/A	N/A	N/A	N/A	N/A	N/A	N/A	N/A	N/A	N/A	N/A	N/A
Schirmer (2016)	Linking the Human Gut Microbiome to Inflammatory Cytokine Production Capacity	Cell	PRJNA319574	SAMN06110265	Illumina HiSeq 2000	PAIRED	Healthy	Healthy	Adult	N/A	N/A	N/A	N/A	N/A	N/A	N/A	N/A	N/A	N/A	N/A	N/A
Schirmer (2016)	Linking the Human Gut Microbiome to Inflammatory Cytokine Production Capacity	Cell	PRJNA319574	SAMN06110041	Illumina HiSeq 2000	PAIRED	Healthy	Healthy	Adult	N/A	N/A	N/A	N/A	N/A	N/A	N/A	N/A	N/A	N/A	N/A	N/A
Schirmer (2016)	Linking the Human Gut Microbiome to Inflammatory Cytokine Production Capacity	Cell	PRJNA319574	SAMN06110407	Illumina HiSeq 2000	PAIRED	Healthy	Healthy	Adult	N/A	N/A	N/A	N/A	N/A	N/A	N/A	N/A	N/A	N/A	N/A	N/A
Schirmer (2016)	Linking the Human Gut Microbiome to Inflammatory Cytokine Production Capacity	Cell	PRJNA319574	SAMN06110002	Illumina HiSeq 2000	PAIRED	Healthy	Healthy	Adult	N/A	N/A	N/A	N/A	N/A	N/A	N/A	N/A	N/A	N/A	N/A	N/A
Schirmer (2016)	Linking the Human Gut Microbiome to Inflammatory Cytokine Production Capacity	Cell	PRJNA319574	SAMN06110284	Illumina HiSeq 2000	PAIRED	Healthy	Healthy	Adult	N/A	N/A	N/A	N/A	N/A	N/A	N/A	N/A	N/A	N/A	N/A	N/A
Schirmer (2016)	Linking the Human Gut Microbiome to Inflammatory Cytokine Production Capacity	Cell	PRJNA319574	SAMN06110463	Illumina HiSeq 2000	PAIRED	Healthy	Healthy	Adult	N/A	N/A	N/A	N/A	N/A	N/A	N/A	N/A	N/A	N/A	N/A	N/A
Schirmer (2016)	Linking the Human Gut Microbiome to Inflammatory Cytokine Production Capacity	Cell	PRJNA319574	SAMN06110466	Illumina HiSeq 2000	PAIRED	Healthy	Healthy	Adult	N/A	N/A	N/A	N/A	N/A	N/A	N/A	N/A	N/A	N/A	N/A	N/A
Schirmer (2016)	Linking the Human Gut Microbiome to Inflammatory Cytokine Production Capacity	Cell	PRJNA319574	SAMN06110112	Illumina HiSeq 2000	PAIRED	Healthy	Healthy	Adult	N/A	N/A	N/A	N/A	N/A	N/A	N/A	N/A	N/A	N/A	N/A	N/A
Schirmer (2016)	Linking the Human Gut Microbiome to Inflammatory Cytokine Production Capacity	Cell	PRJNA319574	SAMN06110039	Illumina HiSeq 2000	PAIRED	Healthy	Healthy	Adult	N/A	N/A	N/A	N/A	N/A	N/A	N/A	N/A	N/A	N/A	N/A	N/A
Schirmer (2016)	Linking the Human Gut Microbiome to Inflammatory Cytokine Production Capacity	Cell	PRJNA319574	SAMN06110067	Illumina HiSeq 2000	PAIRED	Healthy	Healthy	Adult	N/A	N/A	N/A	N/A	N/A	N/A	N/A	N/A	N/A	N/A	N/A	N/A
Schirmer (2016)	Linking the Human Gut Microbiome to Inflammatory Cytokine Production Capacity	Cell	PRJNA319574	SAMN06110341	Illumina HiSeq 2000	PAIRED	Healthy	Healthy	Adult	N/A	N/A	N/A	N/A	N/A	N/A	N/A	N/A	N/A	N/A	N/A	N/A
Schirmer (2016)	Linking the Human Gut Microbiome to Inflammatory Cytokine Production Capacity	Cell	PRJNA319574	SAMN06110248	Illumina HiSeq 2000	PAIRED	Healthy	Healthy	Adult	N/A	N/A	N/A	N/A	N/A	N/A	N/A	N/A	N/A	N/A	N/A	N/A
Schirmer (2016)	Linking the Human Gut Microbiome to Inflammatory Cytokine Production Capacity	Cell	PRJNA319574	SAMN06110065	Illumina HiSeq 2000	PAIRED	Healthy	Healthy	Adult	N/A	N/A	N/A	N/A	N/A	N/A	N/A	N/A	N/A	N/A	N/A	N/A
Schirmer (2016)	Linking the Human Gut Microbiome to Inflammatory Cytokine Production Capacity	Cell	PRJNA319574	SAMN06110385	Illumina HiSeq 2000	PAIRED	Healthy	Healthy	Adult	N/A	N/A	N/A	N/A	N/A	N/A	N/A	N/A	N/A	N/A	N/A	N/A
Schirmer (2016)	Linking the Human Gut Microbiome to Inflammatory Cytokine Production Capacity	Cell	PRJNA319574	SAMN06110388	Illumina HiSeq 2000	PAIRED	Healthy	Healthy	Adult	N/A	N/A	N/A	N/A	N/A	N/A	N/A	N/A	N/A	N/A	N/A	N/A
Schirmer (2016)	Linking the Human Gut Microbiome to Inflammatory Cytokine Production Capacity	Cell	PRJNA319574	SAMN06110135	Illumina HiSeq 2000	PAIRED	Healthy	Healthy	Adult	N/A	N/A	N/A	N/A	N/A	N/A	N/A	N/A	N/A	N/A	N/A	N/A
Schirmer (2016)	Linking the Human Gut Microbiome to Inflammatory Cytokine Production Capacity	Cell	PRJNA319574	SAMN06110425	Illumina HiSeq 2000	PAIRED	Healthy	Healthy	Adult	N/A	N/A	N/A	N/A	N/A	N/A	N/A	N/A	N/A	N/A	N/A	N/A
Schirmer (2016)	Linking the Human Gut Microbiome to Inflammatory Cytokine Production Capacity	Cell	PRJNA319574	SAMN06110335	Illumina HiSeq 2000	PAIRED	Healthy	Healthy	Adult	N/A	N/A	N/A	N/A	N/A	N/A	N/A	N/A	N/A	N/A	N/A	N/A
Schirmer (2016)	Linking the Human Gut Microbiome to Inflammatory Cytokine Production Capacity	Cell	PRJNA319574	SAMN06110309	Illumina HiSeq 2000	PAIRED	Healthy	Healthy	Adult	N/A	N/A	N/A	N/A	N/A	N/A	N/A	N/A	N/A	N/A	N/A	N/A
Schirmer (2016)	Linking the Human Gut Microbiome to Inflammatory Cytokine Production Capacity	Cell	PRJNA319574	SAMN06110282	Illumina HiSeq 2000	PAIRED	Healthy	Healthy	Adult	N/A	N/A	N/A	N/A	N/A	N/A	N/A	N/A	N/A	N/A	N/A	N/A
Schirmer (2016)	Linking the Human Gut Microbiome to Inflammatory Cytokine Production Capacity	Cell	PRJNA319574	SAMN06110358	Illumina HiSeq 2000	PAIRED	Healthy	Healthy	Adult	N/A	N/A	N/A	N/A	N/A	N/A	N/A	N/A	N/A	N/A	N/A	N/A
Schirmer (2016)	Linking the Human Gut Microbiome to Inflammatory Cytokine Production Capacity	Cell	PRJNA319574	SAMN06110310	Illumina HiSeq 2000	PAIRED	Healthy	Healthy	Adult	N/A	N/A	N/A	N/A	N/A	N/A	N/A	N/A	N/A	N/A	N/A	N/A
Schirmer (2016)	Linking the Human Gut Microbiome to Inflammatory Cytokine Production Capacity	Cell	PRJNA319574	SAMN06110455	Illumina HiSeq 2000	PAIRED	Healthy	Healthy	Adult	N/A	N/A	N/A	N/A	N/A	N/A	N/A	N/A	N/A	N/A	N/A	N/A
Schirmer (2016)	Linking the Human Gut Microbiome to Inflammatory Cytokine Production Capacity	Cell	PRJNA319574	SAMN06110377	Illumina HiSeq 2000	PAIRED	Healthy	Healthy	Adult	N/A	N/A	N/A	N/A	N/A	N/A	N/A	N/A	N/A	N/A	N/A	N/A
Schirmer (2016)	Linking the Human Gut Microbiome to Inflammatory Cytokine Production Capacity	Cell	PRJNA319574	SAMN06110182	Illumina HiSeq 2000	PAIRED	Healthy	Healthy	Adult	N/A	N/A	N/A	N/A	N/A	N/A	N/A	N/A	N/A	N/A	N/A	N/A
Schirmer (2016)	Linking the Human Gut Microbiome to Inflammatory Cytokine Production Capacity	Cell	PRJNA319574	SAMN06110368	Illumina HiSeq 2000	PAIRED	Healthy	Healthy	Adult	N/A	N/A	N/A	N/A	N/A	N/A	N/A	N/A	N/A	N/A	N/A	N/A
Schirmer (2016)	Linking the Human Gut Microbiome to Inflammatory Cytokine Production Capacity	Cell	PRJNA319574	SAMN06110106	Illumina HiSeq 2000	PAIRED	Healthy	Healthy	Adult	N/A	N/A	N/A	N/A	N/A	N/A	N/A	N/A	N/A	N/A	N/A	N/A
Schirmer (2016)	Linking the Human Gut Microbiome to Inflammatory Cytokine Production Capacity	Cell	PRJNA319574	SAMN06110292	Illumina HiSeq 2000	PAIRED	Healthy	Healthy	Adult	N/A	N/A	N/A	N/A	N/A	N/A	N/A	N/A	N/A	N/A	N/A	N/A
Schirmer (2016)	Linking the Human Gut Microbiome to Inflammatory Cytokine Production Capacity	Cell	PRJNA319574	SAMN06110033	Illumina HiSeq 2000	PAIRED	Healthy	Healthy	Adult	N/A	N/A	N/A	N/A	N/A	N/A	N/A	N/A	N/A	N/A	N/A	N/A
Schirmer (2016)	Linking the Human Gut Microbiome to Inflammatory Cytokine Production Capacity	Cell	PRJNA319574	SAMN06110296	Illumina HiSeq 2000	PAIRED	Healthy	Healthy	Adult	N/A	N/A	N/A	N/A	N/A	N/A	N/A	N/A	N/A	N/A	N/A	N/A
Schirmer (2016)	Linking the Human Gut Microbiome to Inflammatory Cytokine Production Capacity	Cell	PRJNA319574	SAMN06110442	Illumina HiSeq 2000	PAIRED	Healthy	Healthy	Adult	N/A	N/A	N/A	N/A	N/A	N/A	N/A	N/A	N/A	N/A	N/A	N/A
Schirmer (2016)	Linking the Human Gut Microbiome to Inflammatory Cytokine Production Capacity	Cell	PRJNA319574	SAMN06110263	Illumina HiSeq 2000	PAIRED	Healthy	Healthy	Adult	N/A	N/A	N/A	N/A	N/A	N/A	N/A	N/A	N/A	N/A	N/A	N/A
Schirmer (2016)	Linking the Human Gut Microbiome to Inflammatory Cytokine Production Capacity	Cell	PRJNA319574	SAMN06110300	Illumina HiSeq 2000	PAIRED	Healthy	Healthy	Adult	N/A	N/A	N/A	N/A	N/A	N/A	N/A	N/A	N/A	N/A	N/A	N/A
Schirmer (2016)	Linking the Human Gut Microbiome to Inflammatory Cytokine Production Capacity	Cell	PRJNA319574	SAMN06110372	Illumina HiSeq 2000	PAIRED	Healthy	Healthy	Adult	N/A	N/A	N/A	N/A	N/A	N/A	N/A	N/A	N/A	N/A	N/A	N/A
Schirmer (2016)	Linking the Human Gut Microbiome to Inflammatory Cytokine Production Capacity	Cell	PRJNA319574	SAMN06110129	Illumina HiSeq 2000	PAIRED	Healthy	Healthy	Adult	N/A	N/A	N/A	N/A	N/A	N/A	N/A	N/A	N/A	N/A	N/A	N/A
Schirmer (2016)	Linking the Human Gut Microbiome to Inflammatory Cytokine Production Capacity	Cell	PRJNA319574	SAMN06110038	Illumina HiSeq 2000	PAIRED	Healthy	Healthy	Adult	N/A	N/A	N/A	N/A	N/A	N/A	N/A	N/A	N/A	N/A	N/A	N/A
Schirmer (2016)	Linking the Human Gut Microbiome to Inflammatory Cytokine Production Capacity	Cell	PRJNA319574	SAMN06110009	Illumina HiSeq 2000	PAIRED	Healthy	Healthy	Adult	N/A	N/A	N/A	N/A	N/A	N/A	N/A	N/A	N/A	N/A	N/A	N/A
Schirmer (2016)	Linking the Human Gut Microbiome to Inflammatory Cytokine Production Capacity	Cell	PRJNA319574	SAMN06110357	Illumina HiSeq 2000	PAIRED	Healthy	Healthy	Adult	N/A	N/A	N/A	N/A	N/A	N/A	N/A	N/A	N/A	N/A	N/A	N/A
Schirmer (2016)	Linking the Human Gut Microbiome to Inflammatory Cytokine Production Capacity	Cell	PRJNA319574	SAMN06110132	Illumina HiSeq 2000	PAIRED	Healthy	Healthy	Adult	N/A	N/A	N/A	N/A	N/A	N/A	N/A	N/A	N/A	N/A	N/A	N/A
Schirmer (2016)	Linking the Human Gut Microbiome to Inflammatory Cytokine Production Capacity	Cell	PRJNA319574	SAMN06110275	Illumina HiSeq 2000	PAIRED	Healthy	Healthy	Adult	N/A	N/A	N/A	N/A	N/A	N/A	N/A	N/A	N/A	N/A	N/A	N/A
Schirmer (2016)	Linking the Human Gut Microbiome to Inflammatory Cytokine Production Capacity	Cell	PRJNA319574	SAMN06110290	Illumina HiSeq 2000	PAIRED	Healthy	Healthy	Adult	N/A	N/A	N/A	N/A	N/A	N/A	N/A	N/A	N/A	N/A	N/A	N/A
Schirmer (2016)	Linking the Human Gut Microbiome to Inflammatory Cytokine Production Capacity	Cell	PRJNA319574	SAMN06110081	Illumina HiSeq 2000	PAIRED	Healthy	Healthy	Adult	N/A	N/A	N/A	N/A	N/A	N/A	N/A	N/A	N/A	N/A	N/A	N/A
Schirmer (2016)	Linking the Human Gut Microbiome to Inflammatory Cytokine Production Capacity	Cell	PRJNA319574	SAMN06110143	Illumina HiSeq 2000	PAIRED	Healthy	Healthy	Adult	N/A	N/A	N/A	N/A	N/A	N/A	N/A	N/A	N/A	N/A	N/A	N/A
Schirmer (2016)	Linking the Human Gut Microbiome to Inflammatory Cytokine Production Capacity	Cell	PRJNA319574	SAMN06110100	Illumina HiSeq 2000	PAIRED	Healthy	Healthy	Adult	N/A	N/A	N/A	N/A	N/A	N/A	N/A	N/A	N/A	N/A	N/A	N/A
Schirmer (2016)	Linking the Human Gut Microbiome to Inflammatory Cytokine Production Capacity	Cell	PRJNA319574	SAMN06110174	Illumina HiSeq 2000	PAIRED	Healthy	Healthy	Adult	N/A	N/A	N/A	N/A	N/A	N/A	N/A	N/A	N/A	N/A	N/A	N/A
Schirmer (2016)	Linking the Human Gut Microbiome to Inflammatory Cytokine Production Capacity	Cell	PRJNA319574	SAMN06110191	Illumina HiSeq 2000	PAIRED	Healthy	Healthy	Adult	N/A	N/A	N/A	N/A	N/A	N/A	N/A	N/A	N/A	N/A	N/A	N/A
Schirmer (2016)	Linking the Human Gut Microbiome to Inflammatory Cytokine Production Capacity	Cell	PRJNA319574	SAMN06110214	Illumina HiSeq 2000	PAIRED	Healthy	Healthy	Adult	N/A	N/A	N/A	N/A	N/A	N/A	N/A	N/A	N/A	N/A	N/A	N/A
Schirmer (2016)	Linking the Human Gut Microbiome to Inflammatory Cytokine Production Capacity	Cell	PRJNA319574	SAMN06110217	Illumina HiSeq 2000	PAIRED	Healthy	Healthy	Adult	N/A	N/A	N/A	N/A	N/A	N/A	N/A	N/A	N/A	N/A	N/A	N/A
Schirmer (2016)	Linking the Human Gut Microbiome to Inflammatory Cytokine Production Capacity	Cell	PRJNA319574	SAMN06110141	Illumina HiSeq 2000	PAIRED	Healthy	Healthy	Adult	N/A	N/A	N/A	N/A	N/A	N/A	N/A	N/A	N/A	N/A	N/A	N/A
Schirmer (2016)	Linking the Human Gut Microbiome to Inflammatory Cytokine Production Capacity	Cell	PRJNA319574	SAMN06110336	Illumina HiSeq 2000	PAIRED	Healthy	Healthy	Adult	N/A	N/A	N/A	N/A	N/A	N/A	N/A	N/A	N/A	N/A	N/A	N/A
Schirmer (2016)	Linking the Human Gut Microbiome to Inflammatory Cytokine Production Capacity	Cell	PRJNA319574	SAMN06110232	Illumina HiSeq 2000	PAIRED	Healthy	Healthy	Adult	N/A	N/A	N/A	N/A	N/A	N/A	N/A	N/A	N/A	N/A	N/A	N/A
Schirmer (2016)	Linking the Human Gut Microbiome to Inflammatory Cytokine Production Capacity	Cell	PRJNA319574	SAMN06110187	Illumina HiSeq 2000	PAIRED	Healthy	Healthy	Adult	N/A	N/A	N/A	N/A	N/A	N/A	N/A	N/A	N/A	N/A	N/A	N/A
Schirmer (2016)	Linking the Human Gut Microbiome to Inflammatory Cytokine Production Capacity	Cell	PRJNA319574	SAMN06110034	Illumina HiSeq 2000	PAIRED	Healthy	Healthy	Adult	N/A	N/A	N/A	N/A	N/A	N/A	N/A	N/A	N/A	N/A	N/A	N/A
Schirmer (2016)	Linking the Human Gut Microbiome to Inflammatory Cytokine Production Capacity	Cell	PRJNA319574	SAMN06110071	Illumina HiSeq 2000	PAIRED	Healthy	Healthy	Adult	N/A	N/A	N/A	N/A	N/A	N/A	N/A	N/A	N/A	N/A	N/A	N/A
Schirmer (2016)	Linking the Human Gut Microbiome to Inflammatory Cytokine Production Capacity	Cell	PRJNA319574	SAMN06110349	Illumina HiSeq 2000	PAIRED	Healthy	Healthy	Adult	N/A	N/A	N/A	N/A	N/A	N/A	N/A	N/A	N/A	N/A	N/A	N/A
Schirmer (2016)	Linking the Human Gut Microbiome to Inflammatory Cytokine Production Capacity	Cell	PRJNA319574	SAMN06110116	Illumina HiSeq 2000	PAIRED	Healthy	Healthy	Adult	N/A	N/A	N/A	N/A	N/A	N/A	N/A	N/A	N/A	N/A	N/A	N/A
Schirmer (2016)	Linking the Human Gut Microbiome to Inflammatory Cytokine Production Capacity	Cell	PRJNA319574	SAMN06110212	Illumina HiSeq 2000	PAIRED	Healthy	Healthy	Adult	N/A	N/A	N/A	N/A	N/A	N/A	N/A	N/A	N/A	N/A	N/A	N/A
Schirmer (2016)	Linking the Human Gut Microbiome to Inflammatory Cytokine Production Capacity	Cell	PRJNA319574	SAMN06110399	Illumina HiSeq 2000	PAIRED	Healthy	Healthy	Adult	N/A	N/A	N/A	N/A	N/A	N/A	N/A	N/A	N/A	N/A	N/A	N/A
Schirmer (2016)	Linking the Human Gut Microbiome to Inflammatory Cytokine Production Capacity	Cell	PRJNA319574	SAMN06110245	Illumina HiSeq 2000	PAIRED	Healthy	Healthy	Adult	N/A	N/A	N/A	N/A	N/A	N/A	N/A	N/A	N/A	N/A	N/A	N/A
Schirmer (2016)	Linking the Human Gut Microbiome to Inflammatory Cytokine Production Capacity	Cell	PRJNA319574	SAMN06110281	Illumina HiSeq 2000	PAIRED	Healthy	Healthy	Adult	N/A	N/A	N/A	N/A	N/A	N/A	N/A	N/A	N/A	N/A	N/A	N/A
Schirmer (2016)	Linking the Human Gut Microbiome to Inflammatory Cytokine Production Capacity	Cell	PRJNA319574	SAMN06110211	Illumina HiSeq 2000	PAIRED	Healthy	Healthy	Adult	N/A	N/A	N/A	N/A	N/A	N/A	N/A	N/A	N/A	N/A	N/A	N/A
Schirmer (2016)	Linking the Human Gut Microbiome to Inflammatory Cytokine Production Capacity	Cell	PRJNA319574	SAMN06110013	Illumina HiSeq 2000	PAIRED	Healthy	Healthy	Adult	N/A	N/A	N/A	N/A	N/A	N/A	N/A	N/A	N/A	N/A	N/A	N/A
Schirmer (2016)	Linking the Human Gut Microbiome to Inflammatory Cytokine Production Capacity	Cell	PRJNA319574	SAMN06110084	Illumina HiSeq 2000	PAIRED	Healthy	Healthy	Adult	N/A	N/A	N/A	N/A	N/A	N/A	N/A	N/A	N/A	N/A	N/A	N/A
Schirmer (2016)	Linking the Human Gut Microbiome to Inflammatory Cytokine Production Capacity	Cell	PRJNA319574	SAMN06110426	Illumina HiSeq 2000	PAIRED	Healthy	Healthy	Adult	N/A	N/A	N/A	N/A	N/A	N/A	N/A	N/A	N/A	N/A	N/A	N/A
Schirmer (2016)	Linking the Human Gut Microbiome to Inflammatory Cytokine Production Capacity	Cell	PRJNA319574	SAMN06110423	Illumina HiSeq 2000	PAIRED	Healthy	Healthy	Adult	N/A	N/A	N/A	N/A	N/A	N/A	N/A	N/A	N/A	N/A	N/A	N/A
Schirmer (2016)	Linking the Human Gut Microbiome to Inflammatory Cytokine Production Capacity	Cell	PRJNA319574	SAMN06110163	Illumina HiSeq 2000	PAIRED	Healthy	Healthy	Adult	N/A	N/A	N/A	N/A	N/A	N/A	N/A	N/A	N/A	N/A	N/A	N/A
Schirmer (2016)	Linking the Human Gut Microbiome to Inflammatory Cytokine Production Capacity	Cell	PRJNA319574	SAMN06110395	Illumina HiSeq 2000	PAIRED	Healthy	Healthy	Adult	N/A	N/A	N/A	N/A	N/A	N/A	N/A	N/A	N/A	N/A	N/A	N/A
Schirmer (2016)	Linking the Human Gut Microbiome to Inflammatory Cytokine Production Capacity	Cell	PRJNA319574	SAMN06110264	Illumina HiSeq 2000	PAIRED	Healthy	Healthy	Adult	N/A	N/A	N/A	N/A	N/A	N/A	N/A	N/A	N/A	N/A	N/A	N/A
Schirmer (2016)	Linking the Human Gut Microbiome to Inflammatory Cytokine Production Capacity	Cell	PRJNA319574	SAMN06110133	Illumina HiSeq 2000	PAIRED	Healthy	Healthy	Adult	N/A	N/A	N/A	N/A	N/A	N/A	N/A	N/A	N/A	N/A	N/A	N/A
Schirmer (2016)	Linking the Human Gut Microbiome to Inflammatory Cytokine Production Capacity	Cell	PRJNA319574	SAMN06110046	Illumina HiSeq 2000	PAIRED	Healthy	Healthy	Adult	N/A	N/A	N/A	N/A	N/A	N/A	N/A	N/A	N/A	N/A	N/A	N/A
Schirmer (2016)	Linking the Human Gut Microbiome to Inflammatory Cytokine Production Capacity	Cell	PRJNA319574	SAMN06110152	Illumina HiSeq 2000	PAIRED	Healthy	Healthy	Adult	N/A	N/A	N/A	N/A	N/A	N/A	N/A	N/A	N/A	N/A	N/A	N/A
Schirmer (2016)	Linking the Human Gut Microbiome to Inflammatory Cytokine Production Capacity	Cell	PRJNA319574	SAMN06110115	Illumina HiSeq 2000	PAIRED	Healthy	Healthy	Adult	N/A	N/A	N/A	N/A	N/A	N/A	N/A	N/A	N/A	N/A	N/A	N/A
Schirmer (2016)	Linking the Human Gut Microbiome to Inflammatory Cytokine Production Capacity	Cell	PRJNA319574	SAMN06110293	Illumina HiSeq 2000	PAIRED	Healthy	Healthy	Adult	N/A	N/A	N/A	N/A	N/A	N/A	N/A	N/A	N/A	N/A	N/A	N/A
Schirmer (2016)	Linking the Human Gut Microbiome to Inflammatory Cytokine Production Capacity	Cell	PRJNA319574	SAMN06110130	Illumina HiSeq 2000	PAIRED	Healthy	Healthy	Adult	N/A	N/A	N/A	N/A	N/A	N/A	N/A	N/A	N/A	N/A	N/A	N/A
Schirmer (2016)	Linking the Human Gut Microbiome to Inflammatory Cytokine Production Capacity	Cell	PRJNA319574	SAMN06110444	Illumina HiSeq 2000	PAIRED	Healthy	Healthy	Adult	N/A	N/A	N/A	N/A	N/A	N/A	N/A	N/A	N/A	N/A	N/A	N/A
Schirmer (2016)	Linking the Human Gut Microbiome to Inflammatory Cytokine Production Capacity	Cell	PRJNA319574	SAMN06110287	Illumina HiSeq 2000	PAIRED	Healthy	Healthy	Adult	N/A	N/A	N/A	N/A	N/A	N/A	N/A	N/A	N/A	N/A	N/A	N/A
Schirmer (2016)	Linking the Human Gut Microbiome to Inflammatory Cytokine Production Capacity	Cell	PRJNA319574	SAMN06110257	Illumina HiSeq 2000	PAIRED	Healthy	Healthy	Adult	N/A	N/A	N/A	N/A	N/A	N/A	N/A	N/A	N/A	N/A	N/A	N/A
Schirmer (2016)	Linking the Human Gut Microbiome to Inflammatory Cytokine Production Capacity	Cell	PRJNA319574	SAMN06110460	Illumina HiSeq 2000	PAIRED	Healthy	Healthy	Adult	N/A	N/A	N/A	N/A	N/A	N/A	N/A	N/A	N/A	N/A	N/A	N/A
Schirmer (2016)	Linking the Human Gut Microbiome to Inflammatory Cytokine Production Capacity	Cell	PRJNA319574	SAMN06110394	Illumina HiSeq 2000	PAIRED	Healthy	Healthy	Adult	N/A	N/A	N/A	N/A	N/A	N/A	N/A	N/A	N/A	N/A	N/A	N/A
Schirmer (2016)	Linking the Human Gut Microbiome to Inflammatory Cytokine Production Capacity	Cell	PRJNA319574	SAMN06110288	Illumina HiSeq 2000	PAIRED	Healthy	Healthy	Adult	N/A	N/A	N/A	N/A	N/A	N/A	N/A	N/A	N/A	N/A	N/A	N/A
Schirmer (2016)	Linking the Human Gut Microbiome to Inflammatory Cytokine Production Capacity	Cell	PRJNA319574	SAMN06110469	Illumina HiSeq 2000	PAIRED	Healthy	Healthy	Adult	N/A	N/A	N/A	N/A	N/A	N/A	N/A	N/A	N/A	N/A	N/A	N/A
Schirmer (2016)	Linking the Human Gut Microbiome to Inflammatory Cytokine Production Capacity	Cell	PRJNA319574	SAMN06110229	Illumina HiSeq 2000	PAIRED	Healthy	Healthy	Adult	N/A	N/A	N/A	N/A	N/A	N/A	N/A	N/A	N/A	N/A	N/A	N/A
Schirmer (2016)	Linking the Human Gut Microbiome to Inflammatory Cytokine Production Capacity	Cell	PRJNA319574	SAMN06110404	Illumina HiSeq 2000	PAIRED	Healthy	Healthy	Adult	N/A	N/A	N/A	N/A	N/A	N/A	N/A	N/A	N/A	N/A	N/A	N/A
Schirmer (2016)	Linking the Human Gut Microbiome to Inflammatory Cytokine Production Capacity	Cell	PRJNA319574	SAMN06110149	Illumina HiSeq 2000	PAIRED	Healthy	Healthy	Adult	N/A	N/A	N/A	N/A	N/A	N/A	N/A	N/A	N/A	N/A	N/A	N/A
Schirmer (2016)	Linking the Human Gut Microbiome to Inflammatory Cytokine Production Capacity	Cell	PRJNA319574	SAMN06110190	Illumina HiSeq 2000	PAIRED	Healthy	Healthy	Adult	N/A	N/A	N/A	N/A	N/A	N/A	N/A	N/A	N/A	N/A	N/A	N/A
Schirmer (2016)	Linking the Human Gut Microbiome to Inflammatory Cytokine Production Capacity	Cell	PRJNA319574	SAMN06110305	Illumina HiSeq 2000	PAIRED	Healthy	Healthy	Adult	N/A	N/A	N/A	N/A	N/A	N/A	N/A	N/A	N/A	N/A	N/A	N/A
Schirmer (2016)	Linking the Human Gut Microbiome to Inflammatory Cytokine Production Capacity	Cell	PRJNA319574	SAMN06110092	Illumina HiSeq 2000	PAIRED	Healthy	Healthy	Adult	N/A	N/A	N/A	N/A	N/A	N/A	N/A	N/A	N/A	N/A	N/A	N/A
Schirmer (2016)	Linking the Human Gut Microbiome to Inflammatory Cytokine Production Capacity	Cell	PRJNA319574	SAMN06110359	Illumina HiSeq 2000	PAIRED	Healthy	Healthy	Adult	N/A	N/A	N/A	N/A	N/A	N/A	N/A	N/A	N/A	N/A	N/A	N/A
Schirmer (2016)	Linking the Human Gut Microbiome to Inflammatory Cytokine Production Capacity	Cell	PRJNA319574	SAMN06110433	Illumina HiSeq 2000	PAIRED	Healthy	Healthy	Adult	N/A	N/A	N/A	N/A	N/A	N/A	N/A	N/A	N/A	N/A	N/A	N/A
Schirmer (2016)	Linking the Human Gut Microbiome to Inflammatory Cytokine Production Capacity	Cell	PRJNA319574	SAMN06110355	Illumina HiSeq 2000	PAIRED	Healthy	Healthy	Adult	N/A	N/A	N/A	N/A	N/A	N/A	N/A	N/A	N/A	N/A	N/A	N/A
Schirmer (2016)	Linking the Human Gut Microbiome to Inflammatory Cytokine Production Capacity	Cell	PRJNA319574	SAMN06110330	Illumina HiSeq 2000	PAIRED	Healthy	Healthy	Adult	N/A	N/A	N/A	N/A	N/A	N/A	N/A	N/A	N/A	N/A	N/A	N/A
Schirmer (2016)	Linking the Human Gut Microbiome to Inflammatory Cytokine Production Capacity	Cell	PRJNA319574	SAMN06110413	Illumina HiSeq 2000	PAIRED	Healthy	Healthy	Adult	N/A	N/A	N/A	N/A	N/A	N/A	N/A	N/A	N/A	N/A	N/A	N/A
Schirmer (2016)	Linking the Human Gut Microbiome to Inflammatory Cytokine Production Capacity	Cell	PRJNA319574	SAMN06110054	Illumina HiSeq 2000	PAIRED	Healthy	Healthy	Adult	N/A	N/A	N/A	N/A	N/A	N/A	N/A	N/A	N/A	N/A	N/A	N/A
Schirmer (2016)	Linking the Human Gut Microbiome to Inflammatory Cytokine Production Capacity	Cell	PRJNA319574	SAMN06110168	Illumina HiSeq 2000	PAIRED	Healthy	Healthy	Adult	N/A	N/A	N/A	N/A	N/A	N/A	N/A	N/A	N/A	N/A	N/A	N/A
Schirmer (2016)	Linking the Human Gut Microbiome to Inflammatory Cytokine Production Capacity	Cell	PRJNA319574	SAMN06110311	Illumina HiSeq 2000	PAIRED	Healthy	Healthy	Adult	N/A	N/A	N/A	N/A	N/A	N/A	N/A	N/A	N/A	N/A	N/A	N/A
Schirmer (2016)	Linking the Human Gut Microbiome to Inflammatory Cytokine Production Capacity	Cell	PRJNA319574	SAMN06110226	Illumina HiSeq 2000	PAIRED	Healthy	Healthy	Adult	N/A	N/A	N/A	N/A	N/A	N/A	N/A	N/A	N/A	N/A	N/A	N/A
Schirmer (2016)	Linking the Human Gut Microbiome to Inflammatory Cytokine Production Capacity	Cell	PRJNA319574	SAMN06110048	Illumina HiSeq 2000	PAIRED	Healthy	Healthy	Adult	N/A	N/A	N/A	N/A	N/A	N/A	N/A	N/A	N/A	N/A	N/A	N/A
Schirmer (2016)	Linking the Human Gut Microbiome to Inflammatory Cytokine Production Capacity	Cell	PRJNA319574	SAMN06110159	Illumina HiSeq 2000	PAIRED	Healthy	Healthy	Adult	N/A	N/A	N/A	N/A	N/A	N/A	N/A	N/A	N/A	N/A	N/A	N/A
Schirmer (2016)	Linking the Human Gut Microbiome to Inflammatory Cytokine Production Capacity	Cell	PRJNA319574	SAMN06110295	Illumina HiSeq 2000	PAIRED	Healthy	Healthy	Adult	N/A	N/A	N/A	N/A	N/A	N/A	N/A	N/A	N/A	N/A	N/A	N/A
Schirmer (2016)	Linking the Human Gut Microbiome to Inflammatory Cytokine Production Capacity	Cell	PRJNA319574	SAMN06110185	Illumina HiSeq 2000	PAIRED	Healthy	Healthy	Adult	N/A	N/A	N/A	N/A	N/A	N/A	N/A	N/A	N/A	N/A	N/A	N/A
Schirmer (2016)	Linking the Human Gut Microbiome to Inflammatory Cytokine Production Capacity	Cell	PRJNA319574	SAMN06110031	Illumina HiSeq 2000	PAIRED	Healthy	Healthy	Adult	N/A	N/A	N/A	N/A	N/A	N/A	N/A	N/A	N/A	N/A	N/A	N/A
Schirmer (2016)	Linking the Human Gut Microbiome to Inflammatory Cytokine Production Capacity	Cell	PRJNA319574	SAMN06110465	Illumina HiSeq 2000	PAIRED	Healthy	Healthy	Adult	N/A	N/A	N/A	N/A	N/A	N/A	N/A	N/A	N/A	N/A	N/A	N/A
Schirmer (2016)	Linking the Human Gut Microbiome to Inflammatory Cytokine Production Capacity	Cell	PRJNA319574	SAMN06110086	Illumina HiSeq 2000	PAIRED	Healthy	Healthy	Adult	N/A	N/A	N/A	N/A	N/A	N/A	N/A	N/A	N/A	N/A	N/A	N/A
Schirmer (2016)	Linking the Human Gut Microbiome to Inflammatory Cytokine Production Capacity	Cell	PRJNA319574	SAMN06110390	Illumina HiSeq 2000	PAIRED	Healthy	Healthy	Adult	N/A	N/A	N/A	N/A	N/A	N/A	N/A	N/A	N/A	N/A	N/A	N/A
Schirmer (2016)	Linking the Human Gut Microbiome to Inflammatory Cytokine Production Capacity	Cell	PRJNA319574	SAMN06110365	Illumina HiSeq 2000	PAIRED	Healthy	Healthy	Adult	N/A	N/A	N/A	N/A	N/A	N/A	N/A	N/A	N/A	N/A	N/A	N/A
Schirmer (2016)	Linking the Human Gut Microbiome to Inflammatory Cytokine Production Capacity	Cell	PRJNA319574	SAMN06110243	Illumina HiSeq 2000	PAIRED	Healthy	Healthy	Adult	N/A	N/A	N/A	N/A	N/A	N/A	N/A	N/A	N/A	N/A	N/A	N/A
Schirmer (2016)	Linking the Human Gut Microbiome to Inflammatory Cytokine Production Capacity	Cell	PRJNA319574	SAMN06110468	Illumina HiSeq 2000	PAIRED	Healthy	Healthy	Adult	N/A	N/A	N/A	N/A	N/A	N/A	N/A	N/A	N/A	N/A	N/A	N/A
Schirmer (2016)	Linking the Human Gut Microbiome to Inflammatory Cytokine Production Capacity	Cell	PRJNA319574	SAMN06110011	Illumina HiSeq 2000	PAIRED	Healthy	Healthy	Adult	N/A	N/A	N/A	N/A	N/A	N/A	N/A	N/A	N/A	N/A	N/A	N/A
Schirmer (2016)	Linking the Human Gut Microbiome to Inflammatory Cytokine Production Capacity	Cell	PRJNA319574	SAMN06110042	Illumina HiSeq 2000	PAIRED	Healthy	Healthy	Adult	N/A	N/A	N/A	N/A	N/A	N/A	N/A	N/A	N/A	N/A	N/A	N/A
Schirmer (2016)	Linking the Human Gut Microbiome to Inflammatory Cytokine Production Capacity	Cell	PRJNA319574	SAMN06110326	Illumina HiSeq 2000	PAIRED	Healthy	Healthy	Adult	N/A	N/A	N/A	N/A	N/A	N/A	N/A	N/A	N/A	N/A	N/A	N/A
Schirmer (2016)	Linking the Human Gut Microbiome to Inflammatory Cytokine Production Capacity	Cell	PRJNA319574	SAMN06110348	Illumina HiSeq 2000	PAIRED	Healthy	Healthy	Adult	N/A	N/A	N/A	N/A	N/A	N/A	N/A	N/A	N/A	N/A	N/A	N/A
Schirmer (2016)	Linking the Human Gut Microbiome to Inflammatory Cytokine Production Capacity	Cell	PRJNA319574	SAMN06110083	Illumina HiSeq 2000	PAIRED	Healthy	Healthy	Adult	N/A	N/A	N/A	N/A	N/A	N/A	N/A	N/A	N/A	N/A	N/A	N/A
Schirmer (2016)	Linking the Human Gut Microbiome to Inflammatory Cytokine Production Capacity	Cell	PRJNA319574	SAMN06110079	Illumina HiSeq 2000	PAIRED	Healthy	Healthy	Adult	N/A	N/A	N/A	N/A	N/A	N/A	N/A	N/A	N/A	N/A	N/A	N/A
Schirmer (2016)	Linking the Human Gut Microbiome to Inflammatory Cytokine Production Capacity	Cell	PRJNA319574	SAMN06110080	Illumina HiSeq 2000	PAIRED	Healthy	Healthy	Adult	N/A	N/A	N/A	N/A	N/A	N/A	N/A	N/A	N/A	N/A	N/A	N/A
Schirmer (2016)	Linking the Human Gut Microbiome to Inflammatory Cytokine Production Capacity	Cell	PRJNA319574	SAMN06110017	Illumina HiSeq 2000	PAIRED	Healthy	Healthy	Adult	N/A	N/A	N/A	N/A	N/A	N/A	N/A	N/A	N/A	N/A	N/A	N/A
Schirmer (2016)	Linking the Human Gut Microbiome to Inflammatory Cytokine Production Capacity	Cell	PRJNA319574	SAMN06110093	Illumina HiSeq 2000	PAIRED	Healthy	Healthy	Adult	N/A	N/A	N/A	N/A	N/A	N/A	N/A	N/A	N/A	N/A	N/A	N/A
Schirmer (2016)	Linking the Human Gut Microbiome to Inflammatory Cytokine Production Capacity	Cell	PRJNA319574	SAMN06110415	Illumina HiSeq 2000	PAIRED	Healthy	Healthy	Adult	N/A	N/A	N/A	N/A	N/A	N/A	N/A	N/A	N/A	N/A	N/A	N/A
Schirmer (2016)	Linking the Human Gut Microbiome to Inflammatory Cytokine Production Capacity	Cell	PRJNA319574	SAMN06110409	Illumina HiSeq 2000	PAIRED	Healthy	Healthy	Adult	N/A	N/A	N/A	N/A	N/A	N/A	N/A	N/A	N/A	N/A	N/A	N/A
Schirmer (2016)	Linking the Human Gut Microbiome to Inflammatory Cytokine Production Capacity	Cell	PRJNA319574	SAMN06110383	Illumina HiSeq 2000	PAIRED	Healthy	Healthy	Adult	N/A	N/A	N/A	N/A	N/A	N/A	N/A	N/A	N/A	N/A	N/A	N/A
Schirmer (2016)	Linking the Human Gut Microbiome to Inflammatory Cytokine Production Capacity	Cell	PRJNA319574	SAMN06110121	Illumina HiSeq 2000	PAIRED	Healthy	Healthy	Adult	N/A	N/A	N/A	N/A	N/A	N/A	N/A	N/A	N/A	N/A	N/A	N/A
Schirmer (2016)	Linking the Human Gut Microbiome to Inflammatory Cytokine Production Capacity	Cell	PRJNA319574	SAMN06110392	Illumina HiSeq 2000	PAIRED	Healthy	Healthy	Adult	N/A	N/A	N/A	N/A	N/A	N/A	N/A	N/A	N/A	N/A	N/A	N/A
Schirmer (2016)	Linking the Human Gut Microbiome to Inflammatory Cytokine Production Capacity	Cell	PRJNA319574	SAMN06110040	Illumina HiSeq 2000	PAIRED	Healthy	Healthy	Adult	N/A	N/A	N/A	N/A	N/A	N/A	N/A	N/A	N/A	N/A	N/A	N/A
Schirmer (2016)	Linking the Human Gut Microbiome to Inflammatory Cytokine Production Capacity	Cell	PRJNA319574	SAMN06110280	Illumina HiSeq 2000	PAIRED	Healthy	Healthy	Adult	N/A	N/A	N/A	N/A	N/A	N/A	N/A	N/A	N/A	N/A	N/A	N/A
Schirmer (2016)	Linking the Human Gut Microbiome to Inflammatory Cytokine Production Capacity	Cell	PRJNA319574	SAMN06110058	Illumina HiSeq 2000	PAIRED	Healthy	Healthy	Adult	N/A	N/A	N/A	N/A	N/A	N/A	N/A	N/A	N/A	N/A	N/A	N/A
Schirmer (2016)	Linking the Human Gut Microbiome to Inflammatory Cytokine Production Capacity	Cell	PRJNA319574	SAMN06110306	Illumina HiSeq 2000	PAIRED	Healthy	Healthy	Adult	N/A	N/A	N/A	N/A	N/A	N/A	N/A	N/A	N/A	N/A	N/A	N/A
Schirmer (2016)	Linking the Human Gut Microbiome to Inflammatory Cytokine Production Capacity	Cell	PRJNA319574	SAMN06110070	Illumina HiSeq 2000	PAIRED	Healthy	Healthy	Adult	N/A	N/A	N/A	N/A	N/A	N/A	N/A	N/A	N/A	N/A	N/A	N/A
Schirmer (2016)	Linking the Human Gut Microbiome to Inflammatory Cytokine Production Capacity	Cell	PRJNA319574	SAMN06110023	Illumina HiSeq 2000	PAIRED	Healthy	Healthy	Adult	N/A	N/A	N/A	N/A	N/A	N/A	N/A	N/A	N/A	N/A	N/A	N/A
Schirmer (2016)	Linking the Human Gut Microbiome to Inflammatory Cytokine Production Capacity	Cell	PRJNA319574	SAMN06110204	Illumina HiSeq 2000	PAIRED	Healthy	Healthy	Adult	N/A	N/A	N/A	N/A	N/A	N/A	N/A	N/A	N/A	N/A	N/A	N/A
Schirmer (2016)	Linking the Human Gut Microbiome to Inflammatory Cytokine Production Capacity	Cell	PRJNA319574	SAMN06110274	Illumina HiSeq 2000	PAIRED	Healthy	Healthy	Adult	N/A	N/A	N/A	N/A	N/A	N/A	N/A	N/A	N/A	N/A	N/A	N/A
Schirmer (2016)	Linking the Human Gut Microbiome to Inflammatory Cytokine Production Capacity	Cell	PRJNA319574	SAMN06110231	Illumina HiSeq 2000	PAIRED	Healthy	Healthy	Adult	N/A	N/A	N/A	N/A	N/A	N/A	N/A	N/A	N/A	N/A	N/A	N/A
Schirmer (2016)	Linking the Human Gut Microbiome to Inflammatory Cytokine Production Capacity	Cell	PRJNA319574	SAMN06110209	Illumina HiSeq 2000	PAIRED	Healthy	Healthy	Adult	N/A	N/A	N/A	N/A	N/A	N/A	N/A	N/A	N/A	N/A	N/A	N/A
Schirmer (2016)	Linking the Human Gut Microbiome to Inflammatory Cytokine Production Capacity	Cell	PRJNA319574	SAMN06110078	Illumina HiSeq 2000	PAIRED	Healthy	Healthy	Adult	N/A	N/A	N/A	N/A	N/A	N/A	N/A	N/A	N/A	N/A	N/A	N/A
Schirmer (2016)	Linking the Human Gut Microbiome to Inflammatory Cytokine Production Capacity	Cell	PRJNA319574	SAMN06110283	Illumina HiSeq 2000	PAIRED	Healthy	Healthy	Adult	N/A	N/A	N/A	N/A	N/A	N/A	N/A	N/A	N/A	N/A	N/A	N/A
Schirmer (2016)	Linking the Human Gut Microbiome to Inflammatory Cytokine Production Capacity	Cell	PRJNA319574	SAMN06110363	Illumina HiSeq 2000	PAIRED	Healthy	Healthy	Adult	N/A	N/A	N/A	N/A	N/A	N/A	N/A	N/A	N/A	N/A	N/A	N/A
Schirmer (2016)	Linking the Human Gut Microbiome to Inflammatory Cytokine Production Capacity	Cell	PRJNA319574	SAMN06110347	Illumina HiSeq 2000	PAIRED	Healthy	Healthy	Adult	N/A	N/A	N/A	N/A	N/A	N/A	N/A	N/A	N/A	N/A	N/A	N/A
Schirmer (2016)	Linking the Human Gut Microbiome to Inflammatory Cytokine Production Capacity	Cell	PRJNA319574	SAMN06110061	Illumina HiSeq 2000	PAIRED	Healthy	Healthy	Adult	N/A	N/A	N/A	N/A	N/A	N/A	N/A	N/A	N/A	N/A	N/A	N/A
Schirmer (2016)	Linking the Human Gut Microbiome to Inflammatory Cytokine Production Capacity	Cell	PRJNA319574	SAMN06110446	Illumina HiSeq 2000	PAIRED	Healthy	Healthy	Adult	N/A	N/A	N/A	N/A	N/A	N/A	N/A	N/A	N/A	N/A	N/A	N/A
Schirmer (2016)	Linking the Human Gut Microbiome to Inflammatory Cytokine Production Capacity	Cell	PRJNA319574	SAMN06110262	Illumina HiSeq 2000	PAIRED	Healthy	Healthy	Adult	N/A	N/A	N/A	N/A	N/A	N/A	N/A	N/A	N/A	N/A	N/A	N/A
Schirmer (2016)	Linking the Human Gut Microbiome to Inflammatory Cytokine Production Capacity	Cell	PRJNA319574	SAMN06110354	Illumina HiSeq 2000	PAIRED	Healthy	Healthy	Adult	N/A	N/A	N/A	N/A	N/A	N/A	N/A	N/A	N/A	N/A	N/A	N/A
Schirmer (2016)	Linking the Human Gut Microbiome to Inflammatory Cytokine Production Capacity	Cell	PRJNA319574	SAMN06110000	Illumina HiSeq 2000	PAIRED	Healthy	Healthy	Adult	N/A	N/A	N/A	N/A	N/A	N/A	N/A	N/A	N/A	N/A	N/A	N/A
Schirmer (2016)	Linking the Human Gut Microbiome to Inflammatory Cytokine Production Capacity	Cell	PRJNA319574	SAMN06110051	Illumina HiSeq 2000	PAIRED	Healthy	Healthy	Adult	N/A	N/A	N/A	N/A	N/A	N/A	N/A	N/A	N/A	N/A	N/A	N/A
Schirmer (2016)	Linking the Human Gut Microbiome to Inflammatory Cytokine Production Capacity	Cell	PRJNA319574	SAMN06110072	Illumina HiSeq 2000	PAIRED	Healthy	Healthy	Adult	N/A	N/A	N/A	N/A	N/A	N/A	N/A	N/A	N/A	N/A	N/A	N/A
Schirmer (2016)	Linking the Human Gut Microbiome to Inflammatory Cytokine Production Capacity	Cell	PRJNA319574	SAMN06110255	Illumina HiSeq 2000	PAIRED	Healthy	Healthy	Adult	N/A	N/A	N/A	N/A	N/A	N/A	N/A	N/A	N/A	N/A	N/A	N/A
Schirmer (2016)	Linking the Human Gut Microbiome to Inflammatory Cytokine Production Capacity	Cell	PRJNA319574	SAMN06110256	Illumina HiSeq 2000	PAIRED	Healthy	Healthy	Adult	N/A	N/A	N/A	N/A	N/A	N/A	N/A	N/A	N/A	N/A	N/A	N/A
Schirmer (2016)	Linking the Human Gut Microbiome to Inflammatory Cytokine Production Capacity	Cell	PRJNA319574	SAMN06110294	Illumina HiSeq 2000	PAIRED	Healthy	Healthy	Adult	N/A	N/A	N/A	N/A	N/A	N/A	N/A	N/A	N/A	N/A	N/A	N/A
Schirmer (2016)	Linking the Human Gut Microbiome to Inflammatory Cytokine Production Capacity	Cell	PRJNA319574	SAMN06110014	Illumina HiSeq 2000	PAIRED	Healthy	Healthy	Adult	N/A	N/A	N/A	N/A	N/A	N/A	N/A	N/A	N/A	N/A	N/A	N/A
Schirmer (2016)	Linking the Human Gut Microbiome to Inflammatory Cytokine Production Capacity	Cell	PRJNA319574	SAMN06110094	Illumina HiSeq 2000	PAIRED	Healthy	Healthy	Adult	N/A	N/A	N/A	N/A	N/A	N/A	N/A	N/A	N/A	N/A	N/A	N/A
Schirmer (2016)	Linking the Human Gut Microbiome to Inflammatory Cytokine Production Capacity	Cell	PRJNA319574	SAMN06110352	Illumina HiSeq 2000	PAIRED	Healthy	Healthy	Adult	N/A	N/A	N/A	N/A	N/A	N/A	N/A	N/A	N/A	N/A	N/A	N/A
Schirmer (2016)	Linking the Human Gut Microbiome to Inflammatory Cytokine Production Capacity	Cell	PRJNA319574	SAMN06110291	Illumina HiSeq 2000	PAIRED	Healthy	Healthy	Adult	N/A	N/A	N/A	N/A	N/A	N/A	N/A	N/A	N/A	N/A	N/A	N/A
Schirmer (2016)	Linking the Human Gut Microbiome to Inflammatory Cytokine Production Capacity	Cell	PRJNA319574	SAMN06110160	Illumina HiSeq 2000	PAIRED	Healthy	Healthy	Adult	N/A	N/A	N/A	N/A	N/A	N/A	N/A	N/A	N/A	N/A	N/A	N/A
Schirmer (2016)	Linking the Human Gut Microbiome to Inflammatory Cytokine Production Capacity	Cell	PRJNA319574	SAMN06110032	Illumina HiSeq 2000	PAIRED	Healthy	Healthy	Adult	N/A	N/A	N/A	N/A	N/A	N/A	N/A	N/A	N/A	N/A	N/A	N/A
Schirmer (2016)	Linking the Human Gut Microbiome to Inflammatory Cytokine Production Capacity	Cell	PRJNA319574	SAMN06110364	Illumina HiSeq 2000	PAIRED	Healthy	Healthy	Adult	N/A	N/A	N/A	N/A	N/A	N/A	N/A	N/A	N/A	N/A	N/A	N/A
Schirmer (2016)	Linking the Human Gut Microbiome to Inflammatory Cytokine Production Capacity	Cell	PRJNA319574	SAMN06110424	Illumina HiSeq 2000	PAIRED	Healthy	Healthy	Adult	N/A	N/A	N/A	N/A	N/A	N/A	N/A	N/A	N/A	N/A	N/A	N/A
Schirmer (2016)	Linking the Human Gut Microbiome to Inflammatory Cytokine Production Capacity	Cell	PRJNA319574	SAMN06110101	Illumina HiSeq 2000	PAIRED	Healthy	Healthy	Adult	N/A	N/A	N/A	N/A	N/A	N/A	N/A	N/A	N/A	N/A	N/A	N/A
Schirmer (2016)	Linking the Human Gut Microbiome to Inflammatory Cytokine Production Capacity	Cell	PRJNA319574	SAMN06110095	Illumina HiSeq 2000	PAIRED	Healthy	Healthy	Adult	N/A	N/A	N/A	N/A	N/A	N/A	N/A	N/A	N/A	N/A	N/A	N/A
Schirmer (2016)	Linking the Human Gut Microbiome to Inflammatory Cytokine Production Capacity	Cell	PRJNA319574	SAMN06110237	Illumina HiSeq 2000	PAIRED	Healthy	Healthy	Adult	N/A	N/A	N/A	N/A	N/A	N/A	N/A	N/A	N/A	N/A	N/A	N/A
Schirmer (2016)	Linking the Human Gut Microbiome to Inflammatory Cytokine Production Capacity	Cell	PRJNA319574	SAMN06110192	Illumina HiSeq 2000	PAIRED	Healthy	Healthy	Adult	N/A	N/A	N/A	N/A	N/A	N/A	N/A	N/A	N/A	N/A	N/A	N/A
Schirmer (2016)	Linking the Human Gut Microbiome to Inflammatory Cytokine Production Capacity	Cell	PRJNA319574	SAMN06110251	Illumina HiSeq 2000	PAIRED	Healthy	Healthy	Adult	N/A	N/A	N/A	N/A	N/A	N/A	N/A	N/A	N/A	N/A	N/A	N/A
Schirmer (2016)	Linking the Human Gut Microbiome to Inflammatory Cytokine Production Capacity	Cell	PRJNA319574	SAMN06110036	Illumina HiSeq 2000	PAIRED	Healthy	Healthy	Adult	N/A	N/A	N/A	N/A	N/A	N/A	N/A	N/A	N/A	N/A	N/A	N/A
Schirmer (2016)	Linking the Human Gut Microbiome to Inflammatory Cytokine Production Capacity	Cell	PRJNA319574	SAMN06110268	Illumina HiSeq 2000	PAIRED	Healthy	Healthy	Adult	N/A	N/A	N/A	N/A	N/A	N/A	N/A	N/A	N/A	N/A	N/A	N/A
Schirmer (2016)	Linking the Human Gut Microbiome to Inflammatory Cytokine Production Capacity	Cell	PRJNA319574	SAMN06110350	Illumina HiSeq 2000	PAIRED	Healthy	Healthy	Adult	N/A	N/A	N/A	N/A	N/A	N/A	N/A	N/A	N/A	N/A	N/A	N/A
Schirmer (2016)	Linking the Human Gut Microbiome to Inflammatory Cytokine Production Capacity	Cell	PRJNA319574	SAMN06110387	Illumina HiSeq 2000	PAIRED	Healthy	Healthy	Adult	N/A	N/A	N/A	N/A	N/A	N/A	N/A	N/A	N/A	N/A	N/A	N/A
Schirmer (2016)	Linking the Human Gut Microbiome to Inflammatory Cytokine Production Capacity	Cell	PRJNA319574	SAMN06110414	Illumina HiSeq 2000	PAIRED	Healthy	Healthy	Adult	N/A	N/A	N/A	N/A	N/A	N/A	N/A	N/A	N/A	N/A	N/A	N/A
Schirmer (2016)	Linking the Human Gut Microbiome to Inflammatory Cytokine Production Capacity	Cell	PRJNA319574	SAMN06110450	Illumina HiSeq 2000	PAIRED	Healthy	Healthy	Adult	N/A	N/A	N/A	N/A	N/A	N/A	N/A	N/A	N/A	N/A	N/A	N/A
Schirmer (2016)	Linking the Human Gut Microbiome to Inflammatory Cytokine Production Capacity	Cell	PRJNA319574	SAMN06110397	Illumina HiSeq 2000	PAIRED	Healthy	Healthy	Adult	N/A	N/A	N/A	N/A	N/A	N/A	N/A	N/A	N/A	N/A	N/A	N/A
Schirmer (2016)	Linking the Human Gut Microbiome to Inflammatory Cytokine Production Capacity	Cell	PRJNA319574	SAMN06110006	Illumina HiSeq 2000	PAIRED	Healthy	Healthy	Adult	N/A	N/A	N/A	N/A	N/A	N/A	N/A	N/A	N/A	N/A	N/A	N/A
Schirmer (2016)	Linking the Human Gut Microbiome to Inflammatory Cytokine Production Capacity	Cell	PRJNA319574	SAMN06110077	Illumina HiSeq 2000	PAIRED	Healthy	Healthy	Adult	N/A	N/A	N/A	N/A	N/A	N/A	N/A	N/A	N/A	N/A	N/A	N/A
Schirmer (2016)	Linking the Human Gut Microbiome to Inflammatory Cytokine Production Capacity	Cell	PRJNA319574	SAMN06110166	Illumina HiSeq 2000	PAIRED	Healthy	Healthy	Adult	N/A	N/A	N/A	N/A	N/A	N/A	N/A	N/A	N/A	N/A	N/A	N/A
Schirmer (2016)	Linking the Human Gut Microbiome to Inflammatory Cytokine Production Capacity	Cell	PRJNA319574	SAMN06110184	Illumina HiSeq 2000	PAIRED	Healthy	Healthy	Adult	N/A	N/A	N/A	N/A	N/A	N/A	N/A	N/A	N/A	N/A	N/A	N/A
Schirmer (2016)	Linking the Human Gut Microbiome to Inflammatory Cytokine Production Capacity	Cell	PRJNA319574	SAMN06110107	Illumina HiSeq 2000	PAIRED	Healthy	Healthy	Adult	N/A	N/A	N/A	N/A	N/A	N/A	N/A	N/A	N/A	N/A	N/A	N/A
Schirmer (2016)	Linking the Human Gut Microbiome to Inflammatory Cytokine Production Capacity	Cell	PRJNA319574	SAMN06110384	Illumina HiSeq 2000	PAIRED	Healthy	Healthy	Adult	N/A	N/A	N/A	N/A	N/A	N/A	N/A	N/A	N/A	N/A	N/A	N/A
Schirmer (2016)	Linking the Human Gut Microbiome to Inflammatory Cytokine Production Capacity	Cell	PRJNA319574	SAMN06110361	Illumina HiSeq 2000	PAIRED	Healthy	Healthy	Adult	N/A	N/A	N/A	N/A	N/A	N/A	N/A	N/A	N/A	N/A	N/A	N/A
Schirmer (2016)	Linking the Human Gut Microbiome to Inflammatory Cytokine Production Capacity	Cell	PRJNA319574	SAMN06110120	Illumina HiSeq 2000	PAIRED	Healthy	Healthy	Adult	N/A	N/A	N/A	N/A	N/A	N/A	N/A	N/A	N/A	N/A	N/A	N/A
Schirmer (2016)	Linking the Human Gut Microbiome to Inflammatory Cytokine Production Capacity	Cell	PRJNA319574	SAMN06110004	Illumina HiSeq 2000	PAIRED	Healthy	Healthy	Adult	N/A	N/A	N/A	N/A	N/A	N/A	N/A	N/A	N/A	N/A	N/A	N/A
Schirmer (2016)	Linking the Human Gut Microbiome to Inflammatory Cytokine Production Capacity	Cell	PRJNA319574	SAMN06110198	Illumina HiSeq 2000	PAIRED	Healthy	Healthy	Adult	N/A	N/A	N/A	N/A	N/A	N/A	N/A	N/A	N/A	N/A	N/A	N/A
Schirmer (2016)	Linking the Human Gut Microbiome to Inflammatory Cytokine Production Capacity	Cell	PRJNA319574	SAMN06110267	Illumina HiSeq 2000	PAIRED	Healthy	Healthy	Adult	N/A	N/A	N/A	N/A	N/A	N/A	N/A	N/A	N/A	N/A	N/A	N/A
Schirmer (2016)	Linking the Human Gut Microbiome to Inflammatory Cytokine Production Capacity	Cell	PRJNA319574	SAMN06110452	Illumina HiSeq 2000	PAIRED	Healthy	Healthy	Adult	N/A	N/A	N/A	N/A	N/A	N/A	N/A	N/A	N/A	N/A	N/A	N/A
Schirmer (2016)	Linking the Human Gut Microbiome to Inflammatory Cytokine Production Capacity	Cell	PRJNA319574	SAMN06110074	Illumina HiSeq 2000	PAIRED	Healthy	Healthy	Adult	N/A	N/A	N/A	N/A	N/A	N/A	N/A	N/A	N/A	N/A	N/A	N/A
Schirmer (2016)	Linking the Human Gut Microbiome to Inflammatory Cytokine Production Capacity	Cell	PRJNA319574	SAMN06110451	Illumina HiSeq 2000	PAIRED	Healthy	Healthy	Adult	N/A	N/A	N/A	N/A	N/A	N/A	N/A	N/A	N/A	N/A	N/A	N/A
Schirmer (2016)	Linking the Human Gut Microbiome to Inflammatory Cytokine Production Capacity	Cell	PRJNA319574	SAMN06110396	Illumina HiSeq 2000	PAIRED	Healthy	Healthy	Adult	N/A	N/A	N/A	N/A	N/A	N/A	N/A	N/A	N/A	N/A	N/A	N/A
Schirmer (2016)	Linking the Human Gut Microbiome to Inflammatory Cytokine Production Capacity	Cell	PRJNA319574	SAMN06110421	Illumina HiSeq 2000	PAIRED	Healthy	Healthy	Adult	N/A	N/A	N/A	N/A	N/A	N/A	N/A	N/A	N/A	N/A	N/A	N/A
Schirmer (2016)	Linking the Human Gut Microbiome to Inflammatory Cytokine Production Capacity	Cell	PRJNA319574	SAMN06110119	Illumina HiSeq 2000	PAIRED	Healthy	Healthy	Adult	N/A	N/A	N/A	N/A	N/A	N/A	N/A	N/A	N/A	N/A	N/A	N/A
Schirmer (2016)	Linking the Human Gut Microbiome to Inflammatory Cytokine Production Capacity	Cell	PRJNA319574	SAMN06110021	Illumina HiSeq 2000	PAIRED	Healthy	Healthy	Adult	N/A	N/A	N/A	N/A	N/A	N/A	N/A	N/A	N/A	N/A	N/A	N/A
Schirmer (2016)	Linking the Human Gut Microbiome to Inflammatory Cytokine Production Capacity	Cell	PRJNA319574	SAMN06110193	Illumina HiSeq 2000	PAIRED	Healthy	Healthy	Adult	N/A	N/A	N/A	N/A	N/A	N/A	N/A	N/A	N/A	N/A	N/A	N/A
Schirmer (2016)	Linking the Human Gut Microbiome to Inflammatory Cytokine Production Capacity	Cell	PRJNA319574	SAMN06110438	Illumina HiSeq 2000	PAIRED	Healthy	Healthy	Adult	N/A	N/A	N/A	N/A	N/A	N/A	N/A	N/A	N/A	N/A	N/A	N/A
Schirmer (2016)	Linking the Human Gut Microbiome to Inflammatory Cytokine Production Capacity	Cell	PRJNA319574	SAMN06110436	Illumina HiSeq 2000	PAIRED	Healthy	Healthy	Adult	N/A	N/A	N/A	N/A	N/A	N/A	N/A	N/A	N/A	N/A	N/A	N/A
Schirmer (2016)	Linking the Human Gut Microbiome to Inflammatory Cytokine Production Capacity	Cell	PRJNA319574	SAMN06110111	Illumina HiSeq 2000	PAIRED	Healthy	Healthy	Adult	N/A	N/A	N/A	N/A	N/A	N/A	N/A	N/A	N/A	N/A	N/A	N/A
Schirmer (2016)	Linking the Human Gut Microbiome to Inflammatory Cytokine Production Capacity	Cell	PRJNA319574	SAMN06110089	Illumina HiSeq 2000	PAIRED	Healthy	Healthy	Adult	N/A	N/A	N/A	N/A	N/A	N/A	N/A	N/A	N/A	N/A	N/A	N/A
Schirmer (2016)	Linking the Human Gut Microbiome to Inflammatory Cytokine Production Capacity	Cell	PRJNA319574	SAMN06110103	Illumina HiSeq 2000	PAIRED	Healthy	Healthy	Adult	N/A	N/A	N/A	N/A	N/A	N/A	N/A	N/A	N/A	N/A	N/A	N/A
Schirmer (2016)	Linking the Human Gut Microbiome to Inflammatory Cytokine Production Capacity	Cell	PRJNA319574	SAMN06110441	Illumina HiSeq 2000	PAIRED	Healthy	Healthy	Adult	N/A	N/A	N/A	N/A	N/A	N/A	N/A	N/A	N/A	N/A	N/A	N/A
Schirmer (2016)	Linking the Human Gut Microbiome to Inflammatory Cytokine Production Capacity	Cell	PRJNA319574	SAMN06110312	Illumina HiSeq 2000	PAIRED	Healthy	Healthy	Adult	N/A	N/A	N/A	N/A	N/A	N/A	N/A	N/A	N/A	N/A	N/A	N/A
Schirmer (2016)	Linking the Human Gut Microbiome to Inflammatory Cytokine Production Capacity	Cell	PRJNA319574	SAMN06110055	Illumina HiSeq 2000	PAIRED	Healthy	Healthy	Adult	N/A	N/A	N/A	N/A	N/A	N/A	N/A	N/A	N/A	N/A	N/A	N/A
Schirmer (2016)	Linking the Human Gut Microbiome to Inflammatory Cytokine Production Capacity	Cell	PRJNA319574	SAMN06110052	Illumina HiSeq 2000	PAIRED	Healthy	Healthy	Adult	N/A	N/A	N/A	N/A	N/A	N/A	N/A	N/A	N/A	N/A	N/A	N/A
Schirmer (2016)	Linking the Human Gut Microbiome to Inflammatory Cytokine Production Capacity	Cell	PRJNA319574	SAMN06110228	Illumina HiSeq 2000	PAIRED	Healthy	Healthy	Adult	N/A	N/A	N/A	N/A	N/A	N/A	N/A	N/A	N/A	N/A	N/A	N/A
Schirmer (2016)	Linking the Human Gut Microbiome to Inflammatory Cytokine Production Capacity	Cell	PRJNA319574	SAMN06110332	Illumina HiSeq 2000	PAIRED	Healthy	Healthy	Adult	N/A	N/A	N/A	N/A	N/A	N/A	N/A	N/A	N/A	N/A	N/A	N/A
Schirmer (2016)	Linking the Human Gut Microbiome to Inflammatory Cytokine Production Capacity	Cell	PRJNA319574	SAMN06110098	Illumina HiSeq 2000	PAIRED	Healthy	Healthy	Adult	N/A	N/A	N/A	N/A	N/A	N/A	N/A	N/A	N/A	N/A	N/A	N/A
Schirmer (2016)	Linking the Human Gut Microbiome to Inflammatory Cytokine Production Capacity	Cell	PRJNA319574	SAMN06110005	Illumina HiSeq 2000	PAIRED	Healthy	Healthy	Adult	N/A	N/A	N/A	N/A	N/A	N/A	N/A	N/A	N/A	N/A	N/A	N/A
Schirmer (2016)	Linking the Human Gut Microbiome to Inflammatory Cytokine Production Capacity	Cell	PRJNA319574	SAMN06110030	Illumina HiSeq 2000	PAIRED	Healthy	Healthy	Adult	N/A	N/A	N/A	N/A	N/A	N/A	N/A	N/A	N/A	N/A	N/A	N/A
Zeevi (2015)	Personalized Nutrition by Prediction of Glycemic Responses	Cell	PRJEB11532	SAMEA3646671	NextSeq 500	PAIRED	Healthy	Healthy	Adult	N/A	N/A	N/A	N/A	N/A	N/A	N/A	N/A	N/A	N/A	N/A	N/A
Zeevi (2015)	Personalized Nutrition by Prediction of Glycemic Responses	Cell	PRJEB11532	SAMEA3646674	NextSeq 500	PAIRED	Healthy	Healthy	Adult	N/A	N/A	N/A	N/A	N/A	N/A	N/A	N/A	N/A	N/A	N/A	N/A
Zeevi (2015)	Personalized Nutrition by Prediction of Glycemic Responses	Cell	PRJEB11532	SAMEA3646676	NextSeq 500	PAIRED	Healthy	Healthy	Adult	N/A	N/A	N/A	N/A	N/A	N/A	N/A	N/A	N/A	N/A	N/A	N/A
Zeevi (2015)	Personalized Nutrition by Prediction of Glycemic Responses	Cell	PRJEB11532	SAMEA3646678	NextSeq 500	PAIRED	Healthy	Healthy	Adult	N/A	N/A	N/A	N/A	N/A	N/A	N/A	N/A	N/A	N/A	N/A	N/A
Zeevi (2015)	Personalized Nutrition by Prediction of Glycemic Responses	Cell	PRJEB11532	SAMEA3646679	NextSeq 500	PAIRED	Healthy	Healthy	Adult	N/A	N/A	N/A	N/A	N/A	N/A	N/A	N/A	N/A	N/A	N/A	N/A
Zeevi (2015)	Personalized Nutrition by Prediction of Glycemic Responses	Cell	PRJEB11532	SAMEA3646680	NextSeq 500	PAIRED	Healthy	Healthy	Adult	N/A	N/A	N/A	N/A	N/A	N/A	N/A	N/A	N/A	N/A	N/A	N/A
Zeevi (2015)	Personalized Nutrition by Prediction of Glycemic Responses	Cell	PRJEB11532	SAMEA3646681	NextSeq 500	PAIRED	Healthy	Healthy	Adult	N/A	N/A	N/A	N/A	N/A	N/A	N/A	N/A	N/A	N/A	N/A	N/A
Zeevi (2015)	Personalized Nutrition by Prediction of Glycemic Responses	Cell	PRJEB11532	SAMEA3646683	NextSeq 500	PAIRED	Healthy	Healthy	Adult	N/A	N/A	N/A	N/A	N/A	N/A	N/A	N/A	N/A	N/A	N/A	N/A
Zeevi (2015)	Personalized Nutrition by Prediction of Glycemic Responses	Cell	PRJEB11532	SAMEA3646684	NextSeq 500	PAIRED	Healthy	Healthy	Adult	N/A	N/A	N/A	N/A	N/A	N/A	N/A	N/A	N/A	N/A	N/A	N/A
Zeevi (2015)	Personalized Nutrition by Prediction of Glycemic Responses	Cell	PRJEB11532	SAMEA3646685	NextSeq 500	PAIRED	Healthy	Healthy	Adult	N/A	N/A	N/A	N/A	N/A	N/A	N/A	N/A	N/A	N/A	N/A	N/A
Zeevi (2015)	Personalized Nutrition by Prediction of Glycemic Responses	Cell	PRJEB11532	SAMEA3646686	NextSeq 500	PAIRED	Healthy	Healthy	Adult	N/A	N/A	N/A	N/A	N/A	N/A	N/A	N/A	N/A	N/A	N/A	N/A
Zeevi (2015)	Personalized Nutrition by Prediction of Glycemic Responses	Cell	PRJEB11532	SAMEA3646689	NextSeq 500	PAIRED	Healthy	Healthy	Adult	N/A	N/A	N/A	N/A	N/A	N/A	N/A	N/A	N/A	N/A	N/A	N/A
Zeevi (2015)	Personalized Nutrition by Prediction of Glycemic Responses	Cell	PRJEB11532	SAMEA3646690	NextSeq 500	PAIRED	Healthy	Healthy	Adult	N/A	N/A	N/A	N/A	N/A	N/A	N/A	N/A	N/A	N/A	N/A	N/A
Zeevi (2015)	Personalized Nutrition by Prediction of Glycemic Responses	Cell	PRJEB11532	SAMEA3646693	NextSeq 500	PAIRED	Healthy	Healthy	Adult	N/A	N/A	N/A	N/A	N/A	N/A	N/A	N/A	N/A	N/A	N/A	N/A
Zeevi (2015)	Personalized Nutrition by Prediction of Glycemic Responses	Cell	PRJEB11532	SAMEA3646694	NextSeq 500	PAIRED	Healthy	Healthy	Adult	N/A	N/A	N/A	N/A	N/A	N/A	N/A	N/A	N/A	N/A	N/A	N/A
Zeevi (2015)	Personalized Nutrition by Prediction of Glycemic Responses	Cell	PRJEB11532	SAMEA3646695	NextSeq 500	PAIRED	Healthy	Healthy	Adult	N/A	N/A	N/A	N/A	N/A	N/A	N/A	N/A	N/A	N/A	N/A	N/A
Zeevi (2015)	Personalized Nutrition by Prediction of Glycemic Responses	Cell	PRJEB11532	SAMEA3646696	NextSeq 500	PAIRED	Healthy	Healthy	Adult	N/A	N/A	N/A	N/A	N/A	N/A	N/A	N/A	N/A	N/A	N/A	N/A
Zeevi (2015)	Personalized Nutrition by Prediction of Glycemic Responses	Cell	PRJEB11532	SAMEA3646698	NextSeq 500	PAIRED	Healthy	Healthy	Adult	N/A	N/A	N/A	N/A	N/A	N/A	N/A	N/A	N/A	N/A	N/A	N/A
Zeevi (2015)	Personalized Nutrition by Prediction of Glycemic Responses	Cell	PRJEB11532	SAMEA3646699	NextSeq 500	PAIRED	Healthy	Healthy	Adult	N/A	N/A	N/A	N/A	N/A	N/A	N/A	N/A	N/A	N/A	N/A	N/A
Zeevi (2015)	Personalized Nutrition by Prediction of Glycemic Responses	Cell	PRJEB11532	SAMEA3646700	NextSeq 500	PAIRED	Healthy	Healthy	Adult	N/A	N/A	N/A	N/A	N/A	N/A	N/A	N/A	N/A	N/A	N/A	N/A
Zeevi (2015)	Personalized Nutrition by Prediction of Glycemic Responses	Cell	PRJEB11532	SAMEA3646701	NextSeq 500	PAIRED	Healthy	Healthy	Adult	N/A	N/A	N/A	N/A	N/A	N/A	N/A	N/A	N/A	N/A	N/A	N/A
Zeevi (2015)	Personalized Nutrition by Prediction of Glycemic Responses	Cell	PRJEB11532	SAMEA3646702	NextSeq 500	PAIRED	Healthy	Healthy	Adult	N/A	N/A	N/A	N/A	N/A	N/A	N/A	N/A	N/A	N/A	N/A	N/A
Zeevi (2015)	Personalized Nutrition by Prediction of Glycemic Responses	Cell	PRJEB11532	SAMEA3646703	NextSeq 500	PAIRED	Healthy	Healthy	Adult	N/A	N/A	N/A	N/A	N/A	N/A	N/A	N/A	N/A	N/A	N/A	N/A
Zeevi (2015)	Personalized Nutrition by Prediction of Glycemic Responses	Cell	PRJEB11532	SAMEA3646706	NextSeq 500	PAIRED	Healthy	Healthy	Adult	N/A	N/A	N/A	N/A	N/A	N/A	N/A	N/A	N/A	N/A	N/A	N/A
Zeevi (2015)	Personalized Nutrition by Prediction of Glycemic Responses	Cell	PRJEB11532	SAMEA3646707	NextSeq 500	PAIRED	Healthy	Healthy	Adult	N/A	N/A	N/A	N/A	N/A	N/A	N/A	N/A	N/A	N/A	N/A	N/A
Zeevi (2015)	Personalized Nutrition by Prediction of Glycemic Responses	Cell	PRJEB11532	SAMEA3646708	NextSeq 500	PAIRED	Healthy	Healthy	Adult	N/A	N/A	N/A	N/A	N/A	N/A	N/A	N/A	N/A	N/A	N/A	N/A
Zeevi (2015)	Personalized Nutrition by Prediction of Glycemic Responses	Cell	PRJEB11532	SAMEA3646709	NextSeq 500	PAIRED	Healthy	Healthy	Adult	N/A	N/A	N/A	N/A	N/A	N/A	N/A	N/A	N/A	N/A	N/A	N/A
Zeevi (2015)	Personalized Nutrition by Prediction of Glycemic Responses	Cell	PRJEB11532	SAMEA3646710	NextSeq 500	PAIRED	Healthy	Healthy	Adult	N/A	N/A	N/A	N/A	N/A	N/A	N/A	N/A	N/A	N/A	N/A	N/A
Zeevi (2015)	Personalized Nutrition by Prediction of Glycemic Responses	Cell	PRJEB11532	SAMEA3646711	NextSeq 500	PAIRED	Healthy	Healthy	Adult	N/A	N/A	N/A	N/A	N/A	N/A	N/A	N/A	N/A	N/A	N/A	N/A
Zeevi (2015)	Personalized Nutrition by Prediction of Glycemic Responses	Cell	PRJEB11532	SAMEA3646712	NextSeq 500	PAIRED	Healthy	Healthy	Adult	N/A	N/A	N/A	N/A	N/A	N/A	N/A	N/A	N/A	N/A	N/A	N/A
Zeevi (2015)	Personalized Nutrition by Prediction of Glycemic Responses	Cell	PRJEB11532	SAMEA3646713	NextSeq 500	PAIRED	Healthy	Healthy	Adult	N/A	N/A	N/A	N/A	N/A	N/A	N/A	N/A	N/A	N/A	N/A	N/A
Zeevi (2015)	Personalized Nutrition by Prediction of Glycemic Responses	Cell	PRJEB11532	SAMEA3646714	NextSeq 500	PAIRED	Healthy	Healthy	Adult	N/A	N/A	N/A	N/A	N/A	N/A	N/A	N/A	N/A	N/A	N/A	N/A
Zeevi (2015)	Personalized Nutrition by Prediction of Glycemic Responses	Cell	PRJEB11532	SAMEA3646715	NextSeq 500	PAIRED	Healthy	Healthy	Adult	N/A	N/A	N/A	N/A	N/A	N/A	N/A	N/A	N/A	N/A	N/A	N/A
Zeevi (2015)	Personalized Nutrition by Prediction of Glycemic Responses	Cell	PRJEB11532	SAMEA3646716	NextSeq 500	PAIRED	Healthy	Healthy	Adult	N/A	N/A	N/A	N/A	N/A	N/A	N/A	N/A	N/A	N/A	N/A	N/A
Zeevi (2015)	Personalized Nutrition by Prediction of Glycemic Responses	Cell	PRJEB11532	SAMEA3646672	NextSeq 500	PAIRED	Healthy	Healthy	Adult	N/A	N/A	N/A	N/A	N/A	N/A	N/A	N/A	N/A	N/A	N/A	N/A
Zeevi (2015)	Personalized Nutrition by Prediction of Glycemic Responses	Cell	PRJEB11532	SAMEA3646673	NextSeq 500	PAIRED	Healthy	Healthy	Adult	N/A	N/A	N/A	N/A	N/A	N/A	N/A	N/A	N/A	N/A	N/A	N/A
Zeevi (2015)	Personalized Nutrition by Prediction of Glycemic Responses	Cell	PRJEB11532	SAMEA3646677	NextSeq 500	PAIRED	Healthy	Healthy	Adult	N/A	N/A	N/A	N/A	N/A	N/A	N/A	N/A	N/A	N/A	N/A	N/A
Zeevi (2015)	Personalized Nutrition by Prediction of Glycemic Responses	Cell	PRJEB11532	SAMEA3646682	NextSeq 500	PAIRED	Healthy	Healthy	Adult	N/A	N/A	N/A	N/A	N/A	N/A	N/A	N/A	N/A	N/A	N/A	N/A
Zeevi (2015)	Personalized Nutrition by Prediction of Glycemic Responses	Cell	PRJEB11532	SAMEA3646687	NextSeq 500	PAIRED	Healthy	Healthy	Adult	N/A	N/A	N/A	N/A	N/A	N/A	N/A	N/A	N/A	N/A	N/A	N/A
Zeevi (2015)	Personalized Nutrition by Prediction of Glycemic Responses	Cell	PRJEB11532	SAMEA3646688	NextSeq 500	PAIRED	Healthy	Healthy	Adult	N/A	N/A	N/A	N/A	N/A	N/A	N/A	N/A	N/A	N/A	N/A	N/A
Zeevi (2015)	Personalized Nutrition by Prediction of Glycemic Responses	Cell	PRJEB11532	SAMEA3646691	NextSeq 500	PAIRED	Healthy	Healthy	Adult	N/A	N/A	N/A	N/A	N/A	N/A	N/A	N/A	N/A	N/A	N/A	N/A
Zeevi (2015)	Personalized Nutrition by Prediction of Glycemic Responses	Cell	PRJEB11532	SAMEA3646692	NextSeq 500	PAIRED	Healthy	Healthy	Adult	N/A	N/A	N/A	N/A	N/A	N/A	N/A	N/A	N/A	N/A	N/A	N/A
Zeevi (2015)	Personalized Nutrition by Prediction of Glycemic Responses	Cell	PRJEB11532	SAMEA3646697	NextSeq 500	PAIRED	Healthy	Healthy	Adult	N/A	N/A	N/A	N/A	N/A	N/A	N/A	N/A	N/A	N/A	N/A	N/A
Zeevi (2015)	Personalized Nutrition by Prediction of Glycemic Responses	Cell	PRJEB11532	SAMEA3646704	NextSeq 500	PAIRED	Healthy	Healthy	Adult	N/A	N/A	N/A	N/A	N/A	N/A	N/A	N/A	N/A	N/A	N/A	N/A
Zeevi (2015)	Personalized Nutrition by Prediction of Glycemic Responses	Cell	PRJEB11532	SAMEA3646705	NextSeq 500	PAIRED	Healthy	Healthy	Adult	N/A	N/A	N/A	N/A	N/A	N/A	N/A	N/A	N/A	N/A	N/A	N/A
Zeevi (2015)	Personalized Nutrition by Prediction of Glycemic Responses	Cell	PRJEB11532	SAMEA3646717	NextSeq 500	PAIRED	Healthy	Healthy	Adult	N/A	N/A	N/A	N/A	N/A	N/A	N/A	N/A	N/A	N/A	N/A	N/A
Zeevi (2015)	Personalized Nutrition by Prediction of Glycemic Responses	Cell	PRJEB11532	SAMEA3646723	NextSeq 500	PAIRED	Healthy	Healthy	Adult	N/A	N/A	N/A	N/A	N/A	N/A	N/A	N/A	N/A	N/A	N/A	N/A
Zeevi (2015)	Personalized Nutrition by Prediction of Glycemic Responses	Cell	PRJEB11532	SAMEA3646724	NextSeq 500	PAIRED	Healthy	Healthy	Adult	N/A	N/A	N/A	N/A	N/A	N/A	N/A	N/A	N/A	N/A	N/A	N/A
Zeevi (2015)	Personalized Nutrition by Prediction of Glycemic Responses	Cell	PRJEB11532	SAMEA3646728	NextSeq 500	PAIRED	Healthy	Healthy	Adult	N/A	N/A	N/A	N/A	N/A	N/A	N/A	N/A	N/A	N/A	N/A	N/A
Zeevi (2015)	Personalized Nutrition by Prediction of Glycemic Responses	Cell	PRJEB11532	SAMEA3646729	NextSeq 500	PAIRED	Healthy	Healthy	Adult	N/A	N/A	N/A	N/A	N/A	N/A	N/A	N/A	N/A	N/A	N/A	N/A
Zeevi (2015)	Personalized Nutrition by Prediction of Glycemic Responses	Cell	PRJEB11532	SAMEA3646730	NextSeq 500	PAIRED	Healthy	Healthy	Adult	N/A	N/A	N/A	N/A	N/A	N/A	N/A	N/A	N/A	N/A	N/A	N/A
Zeevi (2015)	Personalized Nutrition by Prediction of Glycemic Responses	Cell	PRJEB11532	SAMEA3646734	NextSeq 500	PAIRED	Healthy	Healthy	Adult	N/A	N/A	N/A	N/A	N/A	N/A	N/A	N/A	N/A	N/A	N/A	N/A
Zeevi (2015)	Personalized Nutrition by Prediction of Glycemic Responses	Cell	PRJEB11532	SAMEA3646735	NextSeq 500	PAIRED	Healthy	Healthy	Adult	N/A	N/A	N/A	N/A	N/A	N/A	N/A	N/A	N/A	N/A	N/A	N/A
Zeevi (2015)	Personalized Nutrition by Prediction of Glycemic Responses	Cell	PRJEB11532	SAMEA3646736	NextSeq 500	PAIRED	Healthy	Healthy	Adult	N/A	N/A	N/A	N/A	N/A	N/A	N/A	N/A	N/A	N/A	N/A	N/A
Zeevi (2015)	Personalized Nutrition by Prediction of Glycemic Responses	Cell	PRJEB11532	SAMEA3646738	NextSeq 500	PAIRED	Healthy	Healthy	Adult	N/A	N/A	N/A	N/A	N/A	N/A	N/A	N/A	N/A	N/A	N/A	N/A
Zeevi (2015)	Personalized Nutrition by Prediction of Glycemic Responses	Cell	PRJEB11532	SAMEA3646718	NextSeq 500	PAIRED	Healthy	Healthy	Adult	N/A	N/A	N/A	N/A	N/A	N/A	N/A	N/A	N/A	N/A	N/A	N/A
Zeevi (2015)	Personalized Nutrition by Prediction of Glycemic Responses	Cell	PRJEB11532	SAMEA3646722	NextSeq 500	PAIRED	Healthy	Healthy	Adult	N/A	N/A	N/A	N/A	N/A	N/A	N/A	N/A	N/A	N/A	N/A	N/A
Zeevi (2015)	Personalized Nutrition by Prediction of Glycemic Responses	Cell	PRJEB11532	SAMEA3646726	NextSeq 500	PAIRED	Healthy	Healthy	Adult	N/A	N/A	N/A	N/A	N/A	N/A	N/A	N/A	N/A	N/A	N/A	N/A
Zeevi (2015)	Personalized Nutrition by Prediction of Glycemic Responses	Cell	PRJEB11532	SAMEA3646727	NextSeq 500	PAIRED	Healthy	Healthy	Adult	N/A	N/A	N/A	N/A	N/A	N/A	N/A	N/A	N/A	N/A	N/A	N/A
Zeevi (2015)	Personalized Nutrition by Prediction of Glycemic Responses	Cell	PRJEB11532	SAMEA3646731	NextSeq 500	PAIRED	Healthy	Healthy	Adult	N/A	N/A	N/A	N/A	N/A	N/A	N/A	N/A	N/A	N/A	N/A	N/A
[truncated: 2,641 more rows]

## Sheet: Table S2
Data	JADBIO version	Number of tested features	Number of signifficant features	preprocessing	feature selection	predictive alghorithm	AUC	Mean Average Precision	Accuracy	F1 Score	Matthews correlation	Precision	True Positive Rate	Specificity	True Positives (Out-of-sample TP rate)	True Negatives (Out-of-sample TN rate)	False Positives (Out-of-sample FP rate)	False Negatives (Out-of-sample FN rate)
[truncated: 8 more rows]
